# Supplementary material for: Curettage vs. cryosurgery for superficial basal cell carcinoma: a prospective, randomised and controlled trial
Source: PubMed Central journal article supplement — J Eur Acad Dermatol Venereol. 2022 May 21;36(10):1758–65. doi: 10.1111/jdv.18209 (PMC9544261; doi:10.1111/jdv.18209), 2022-05-21
Supplement: JDV-36-1758-s001.pdf [file JDV-36-1758-s001.pdf]

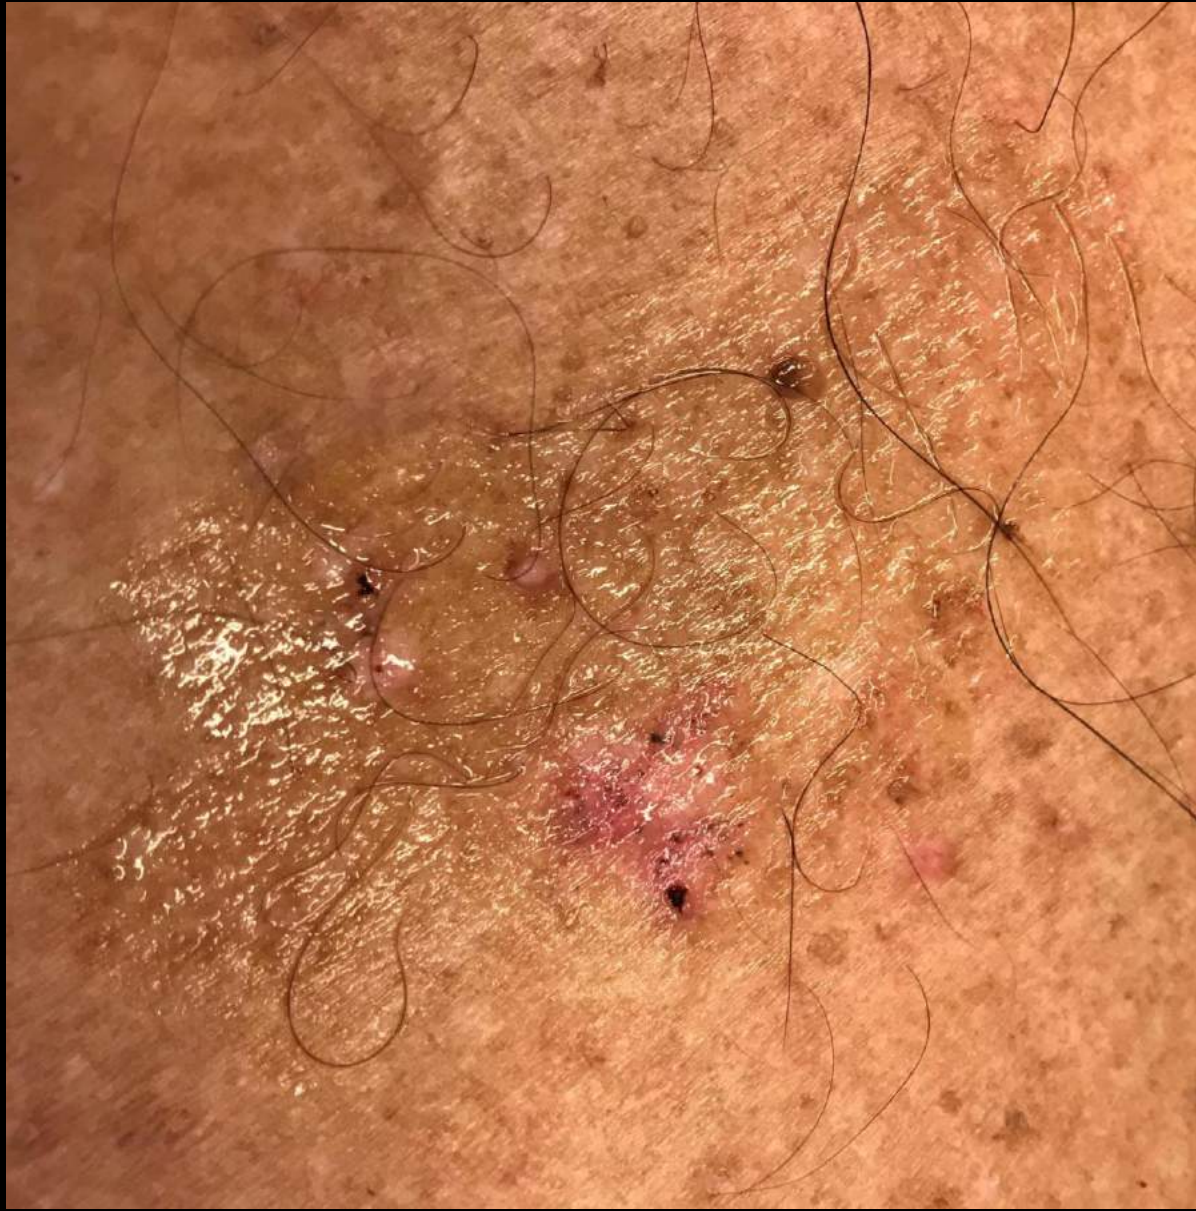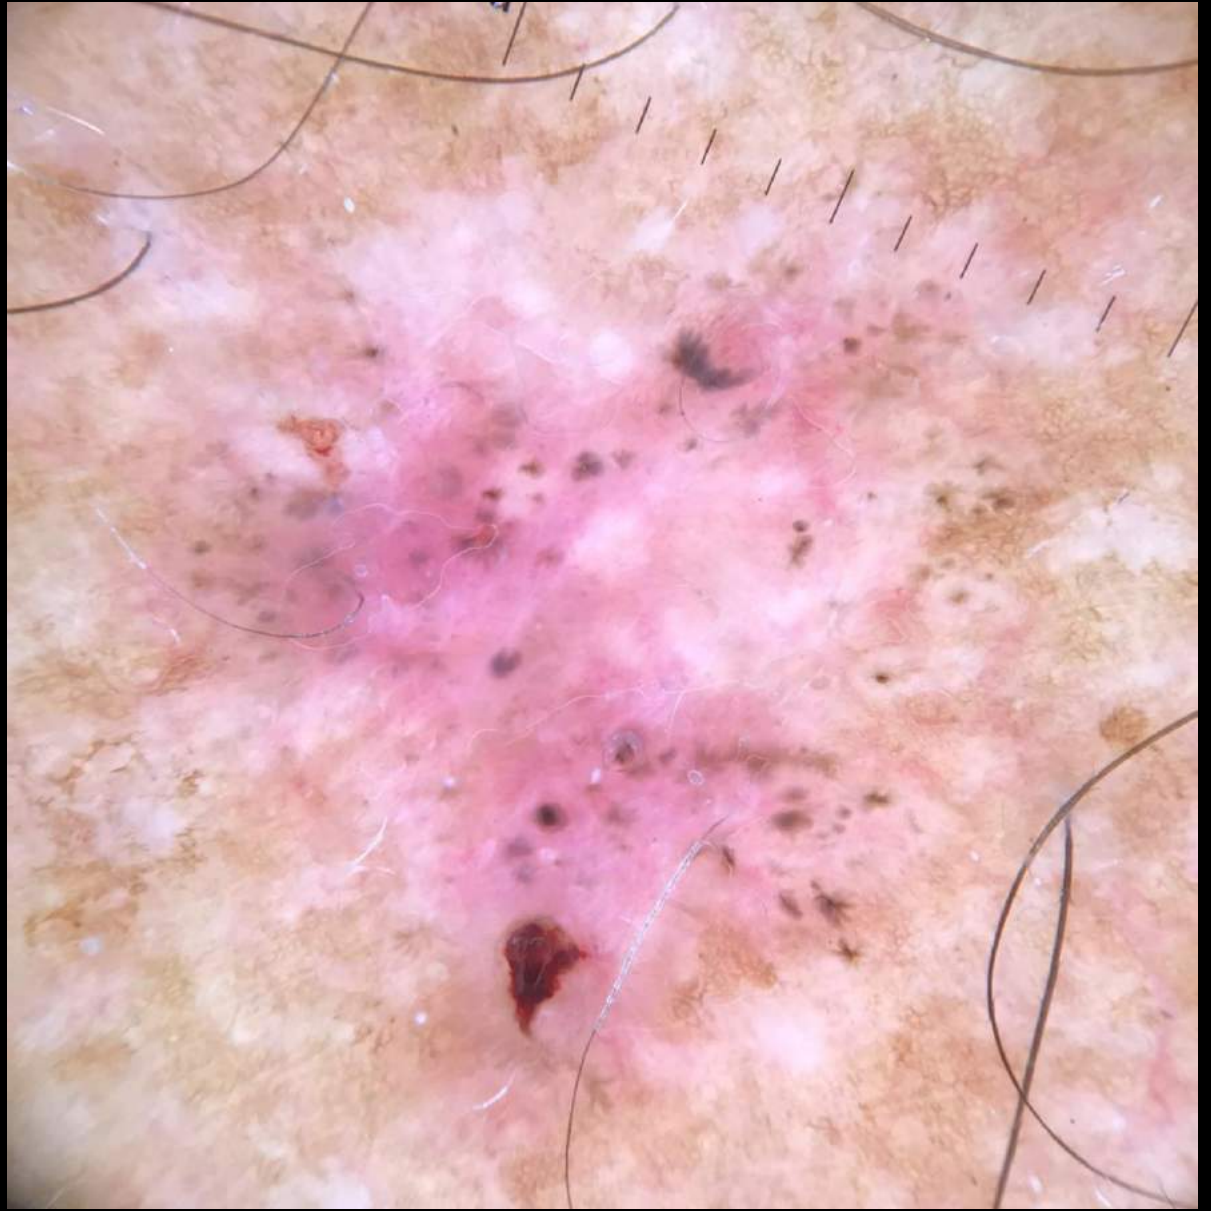

Case number 1



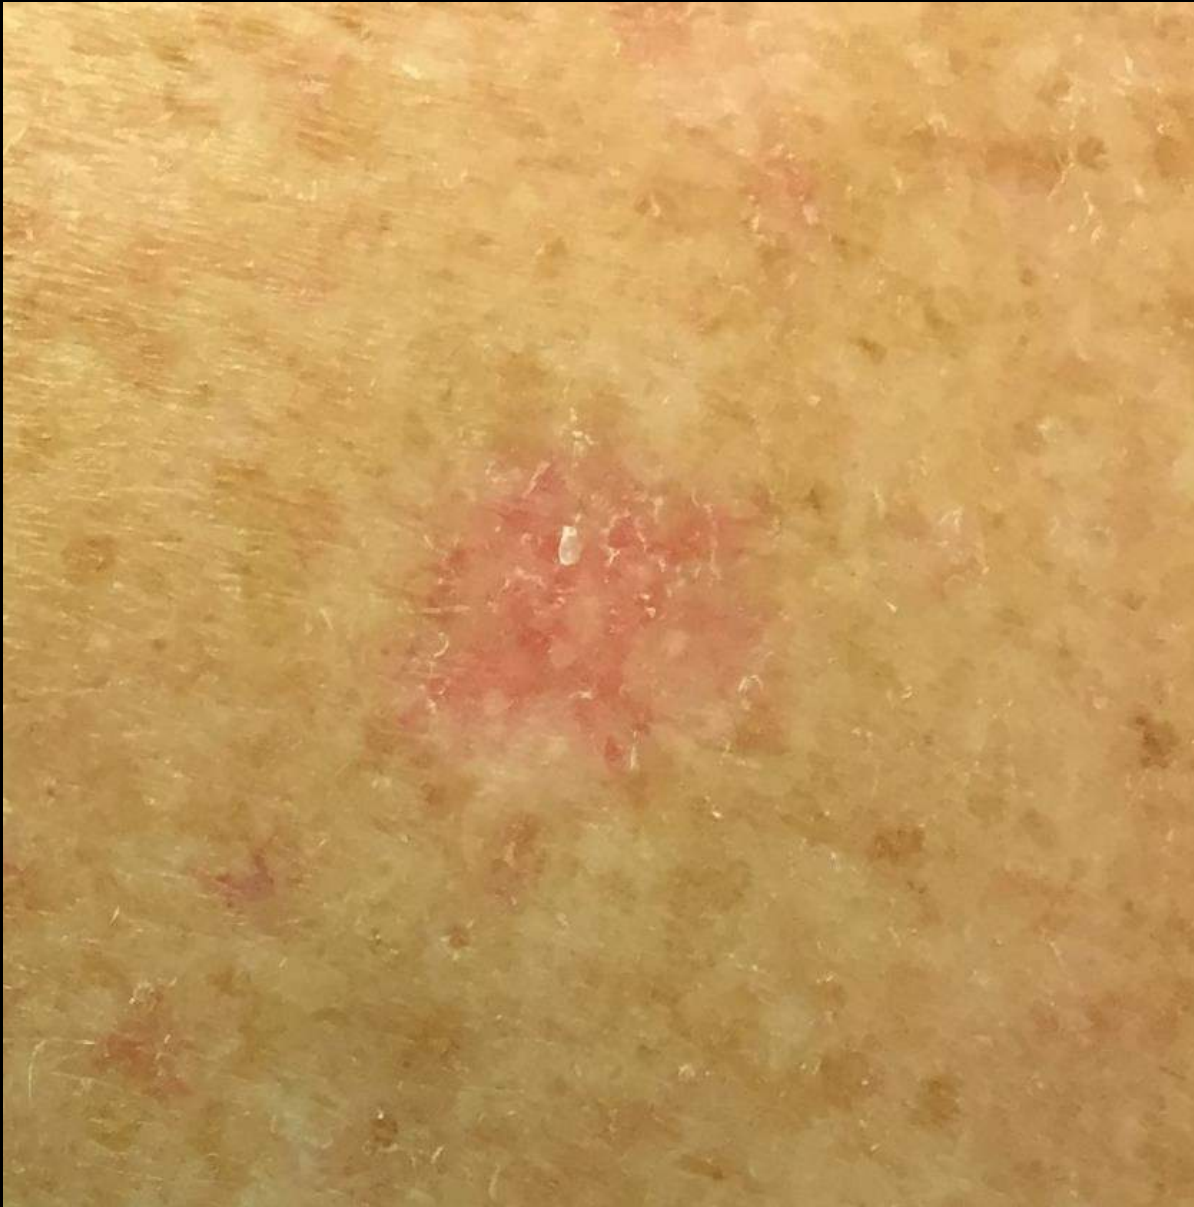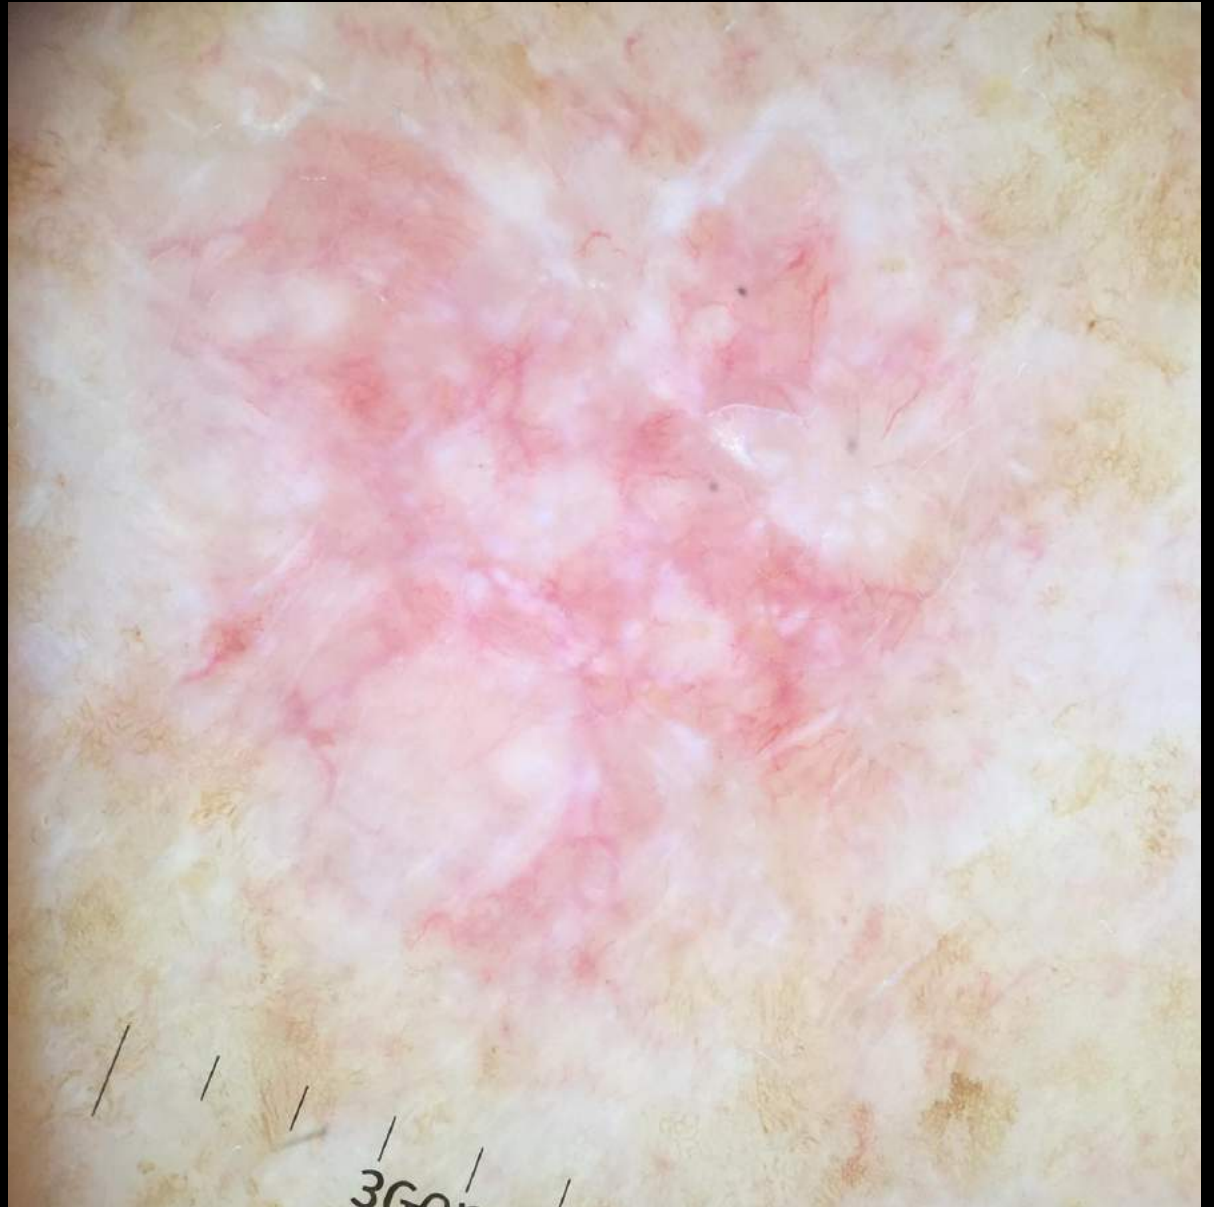

Case number 2



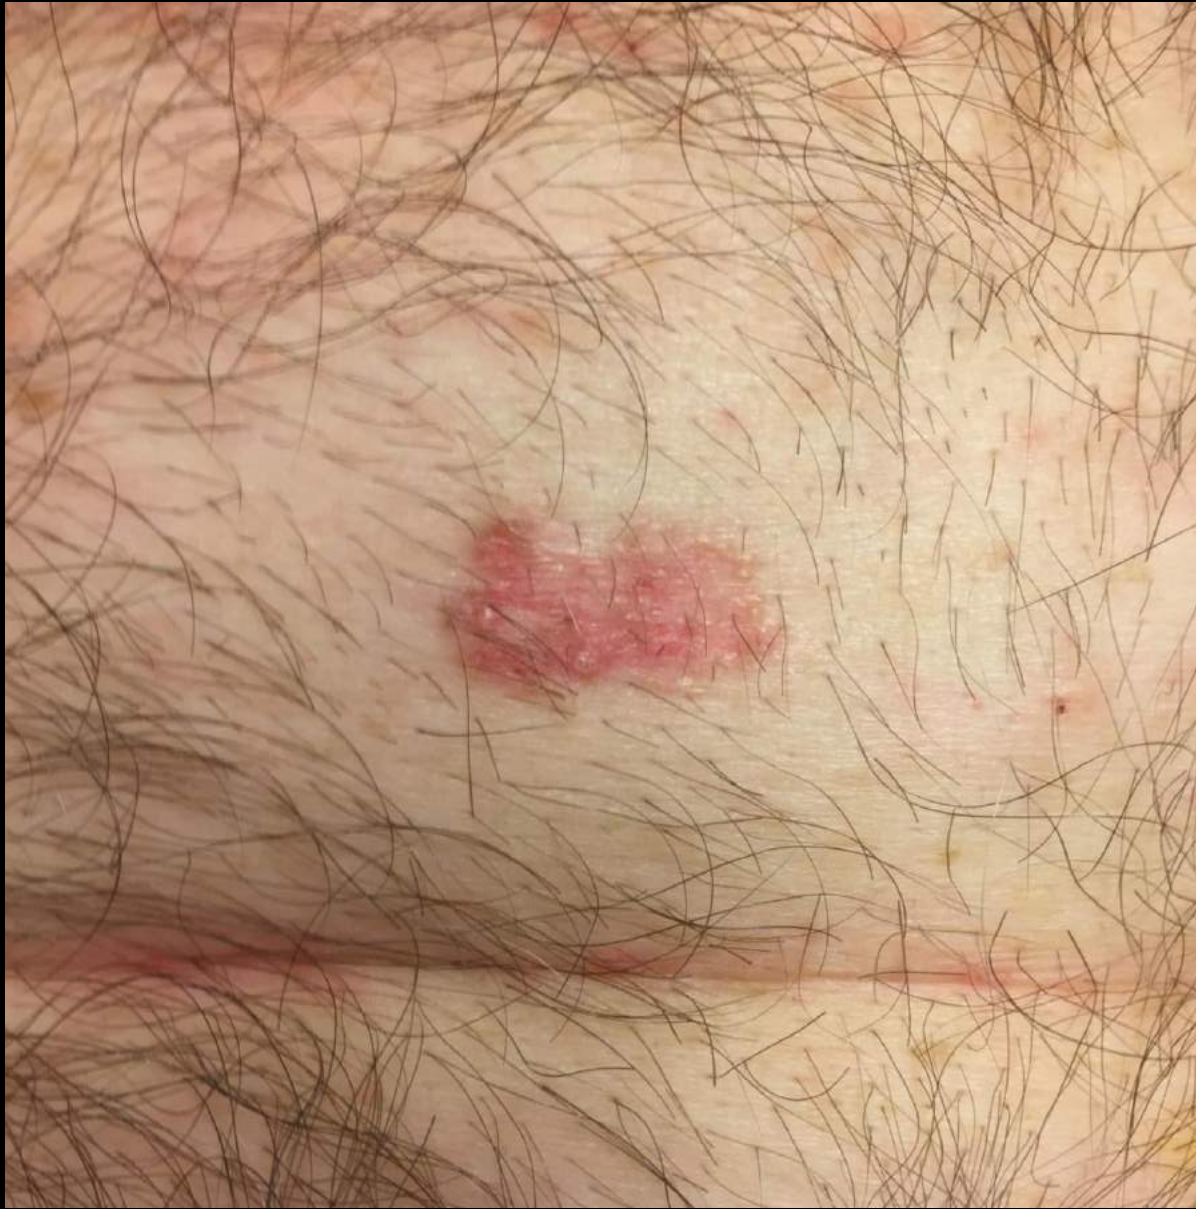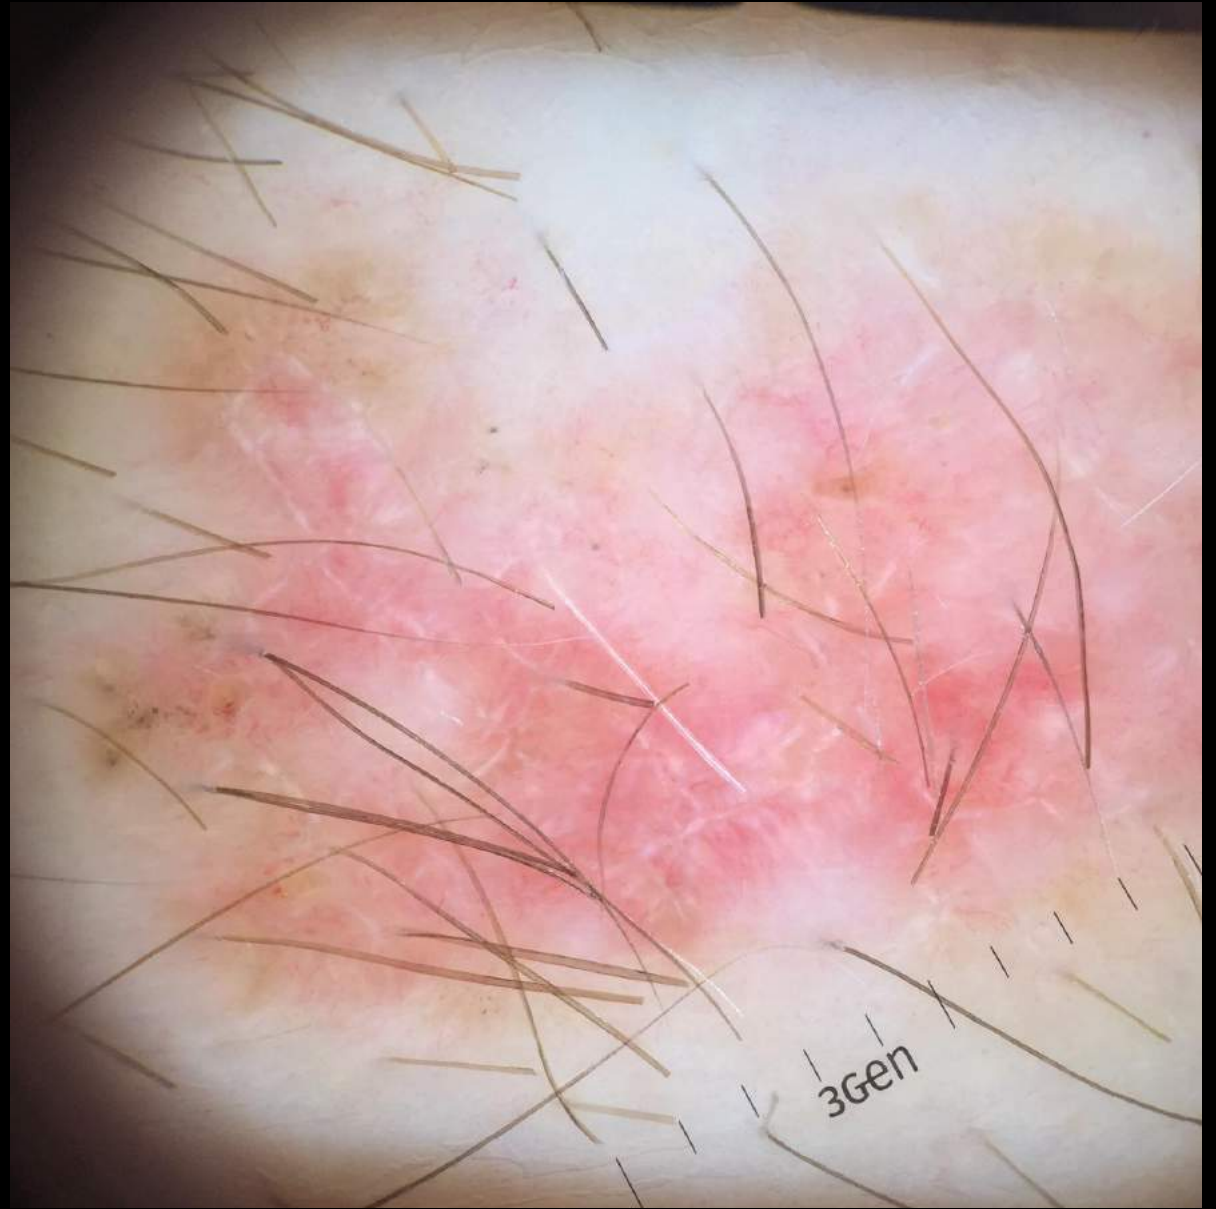

Case number 3



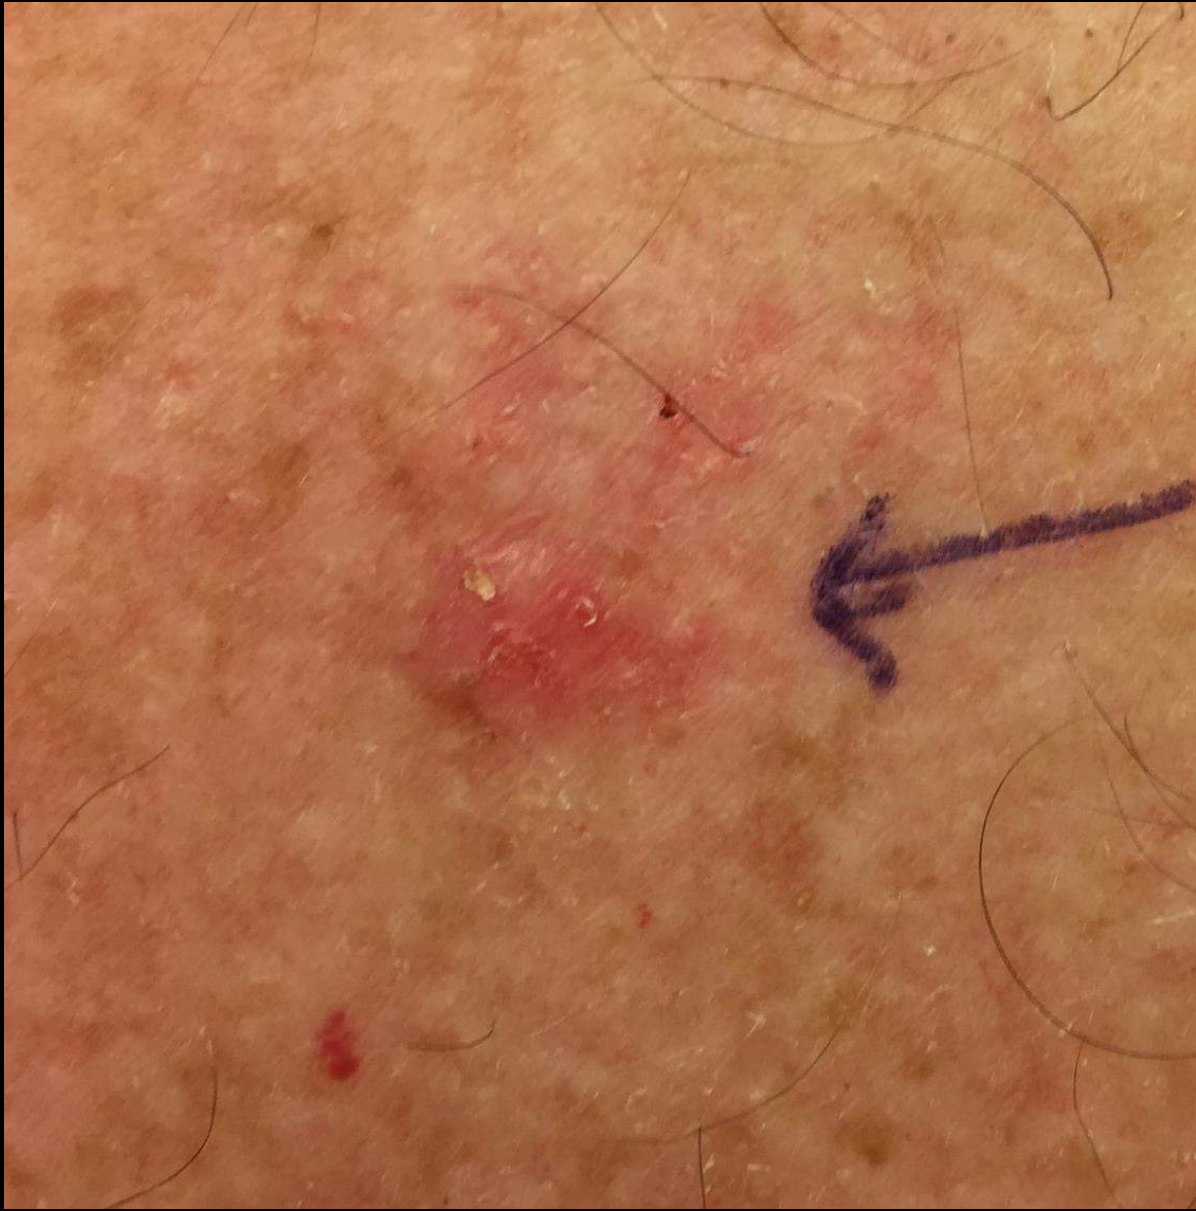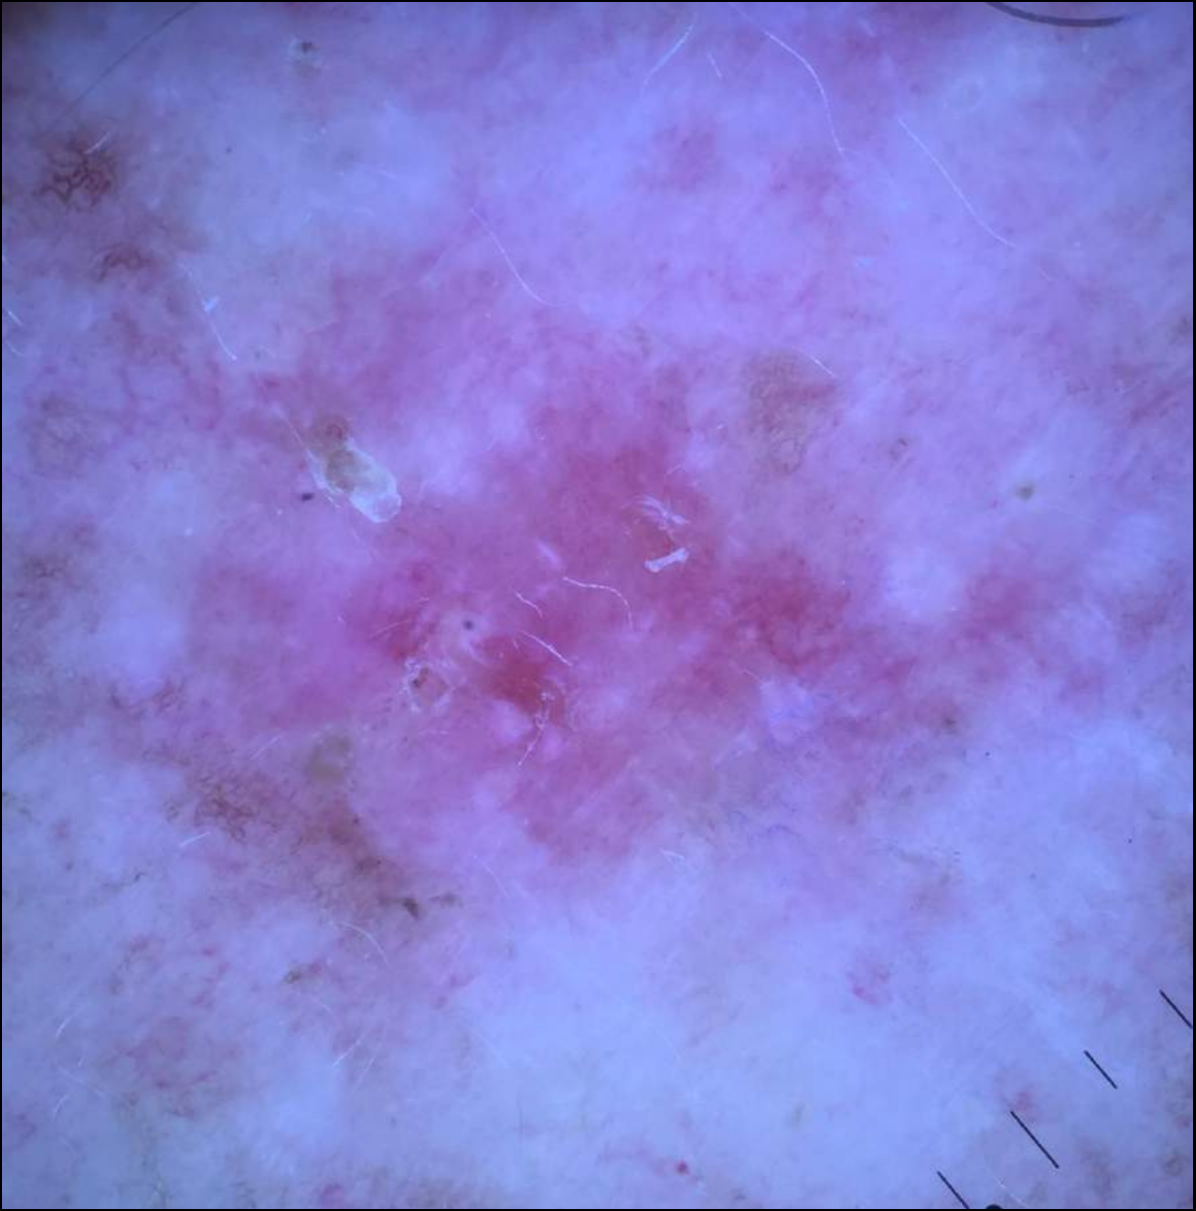

Case number 4



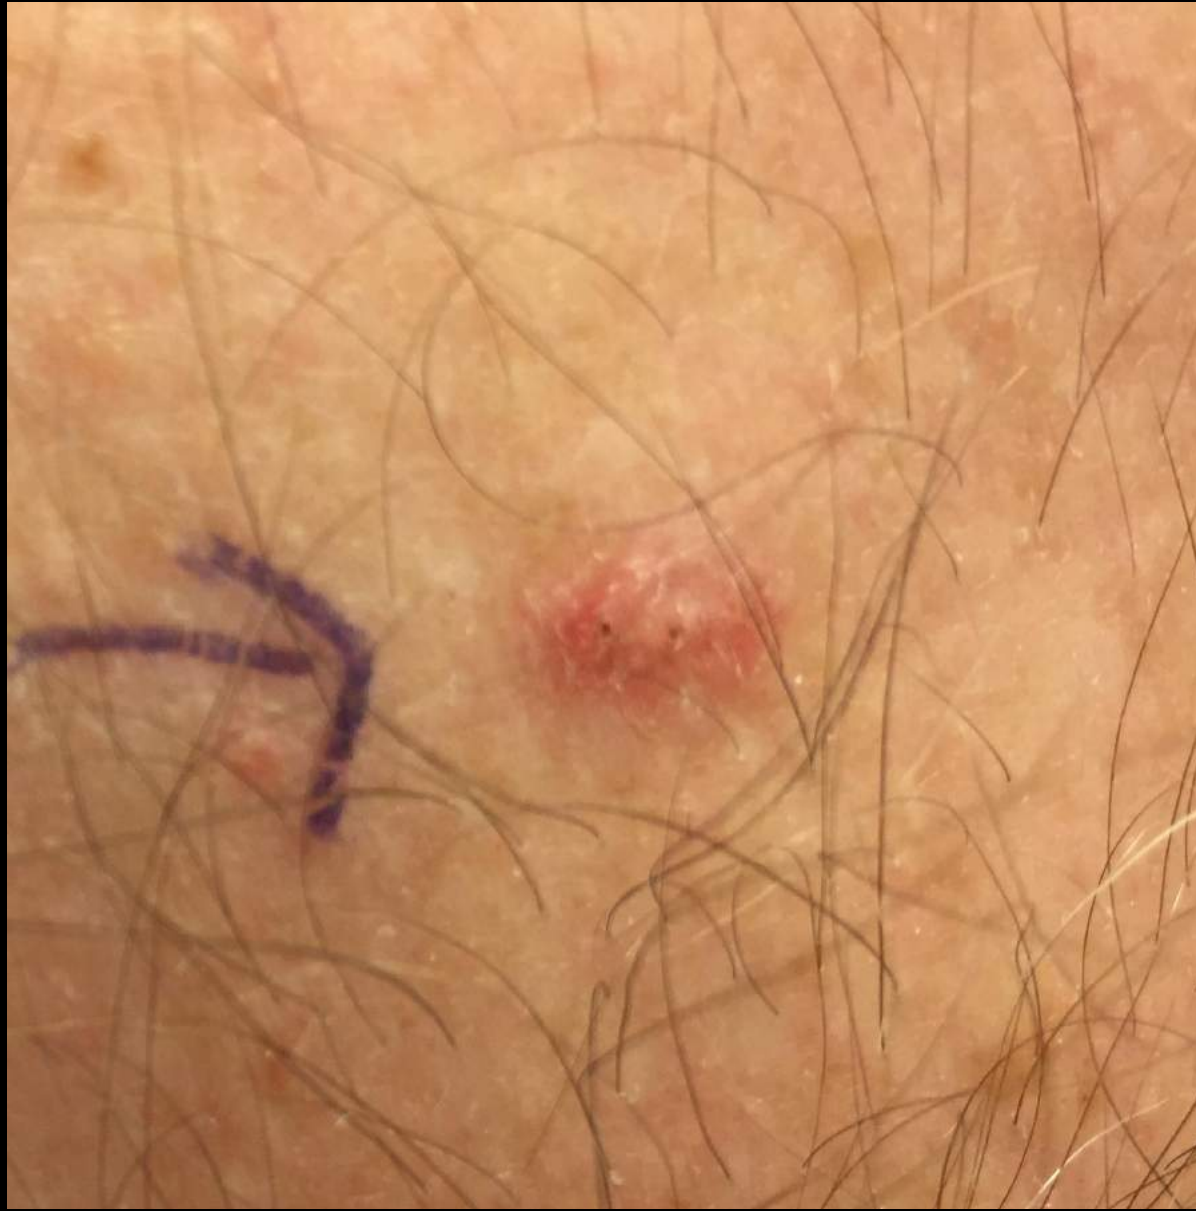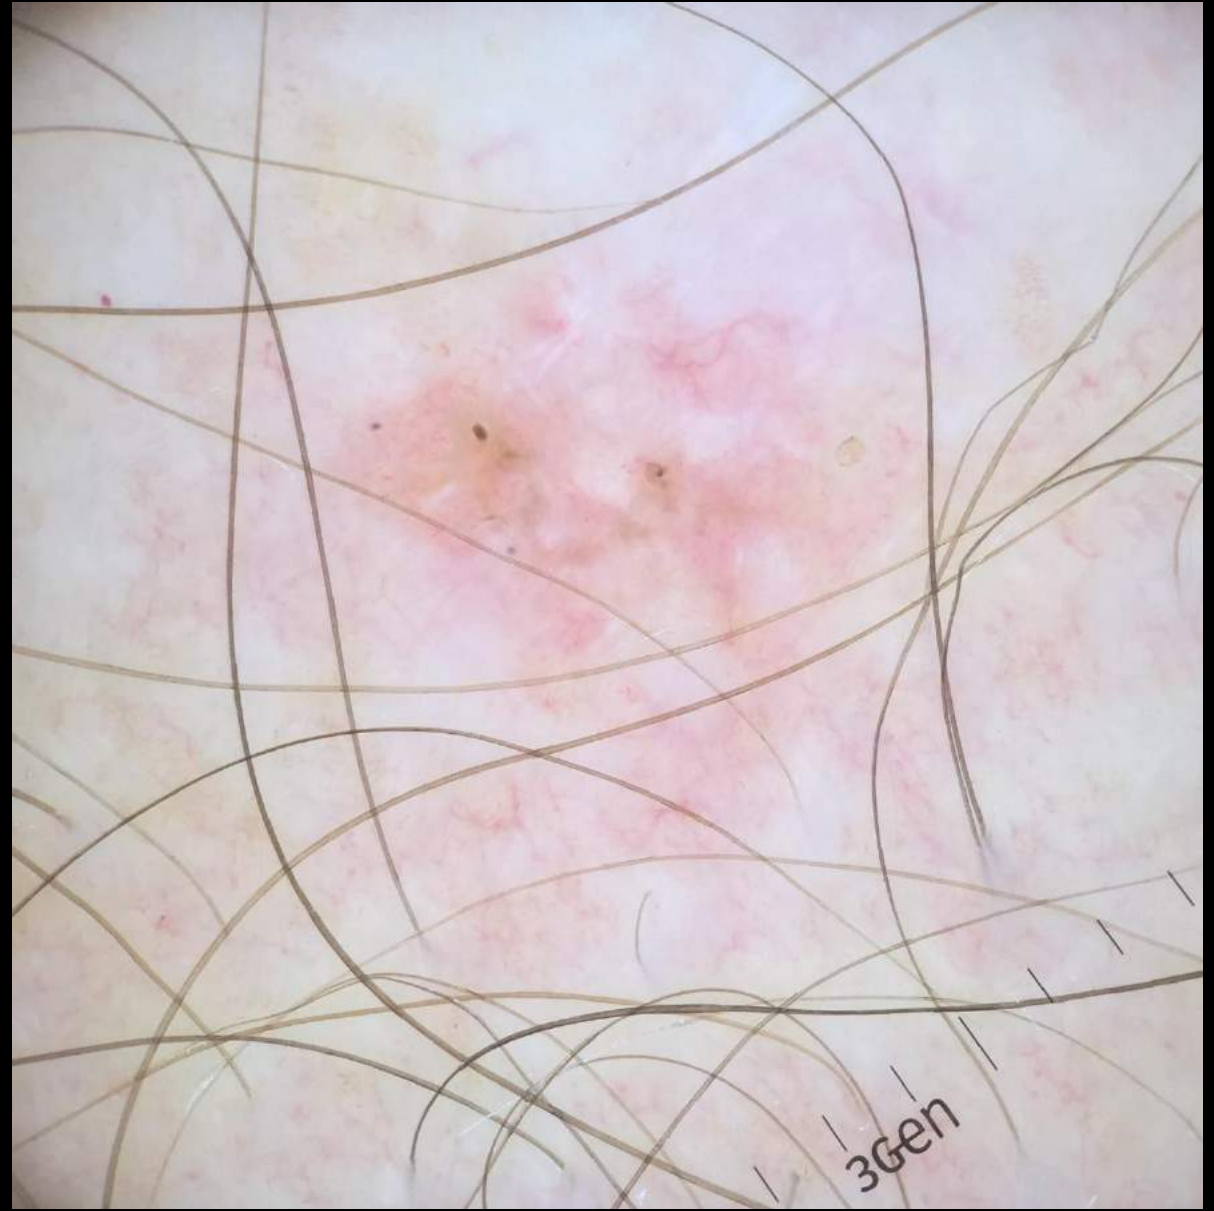

Case number 5



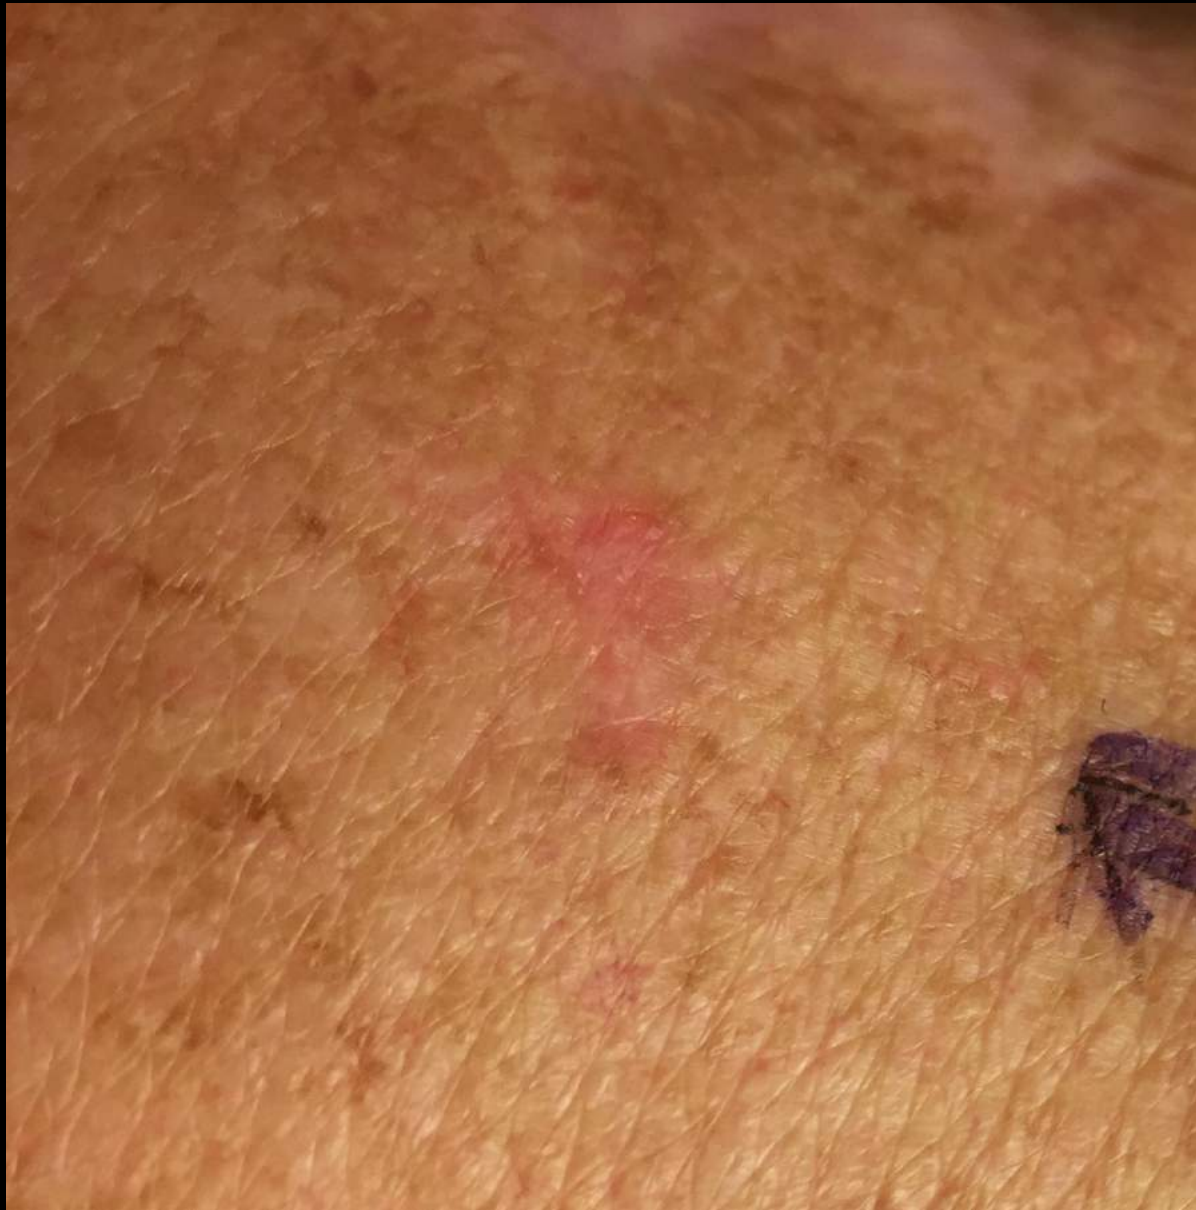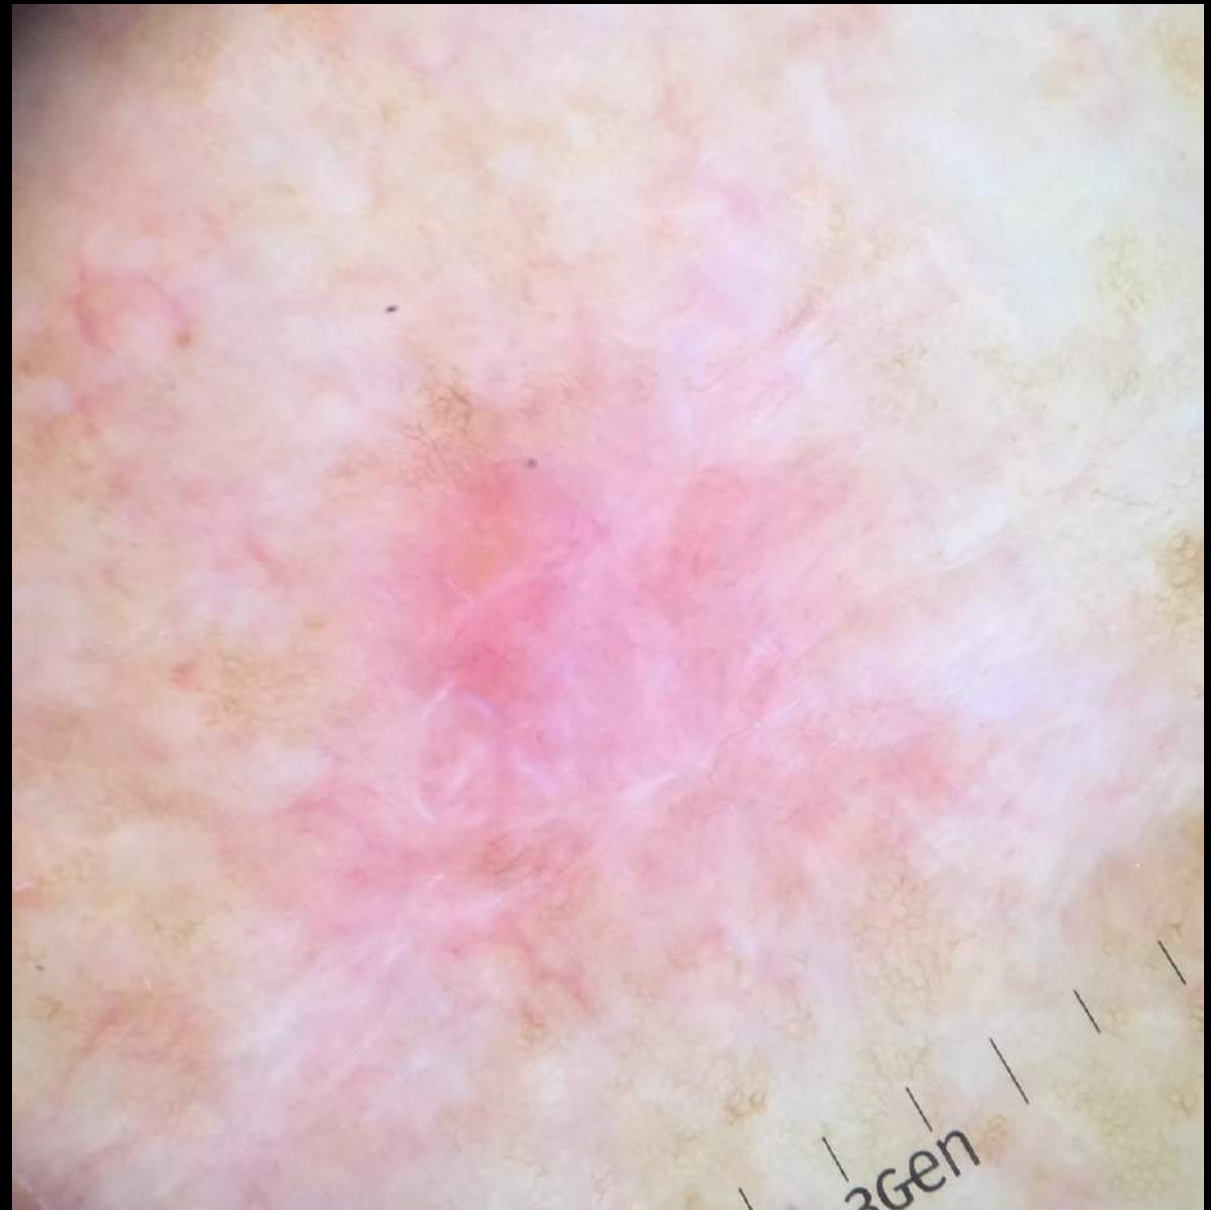

Case number 6



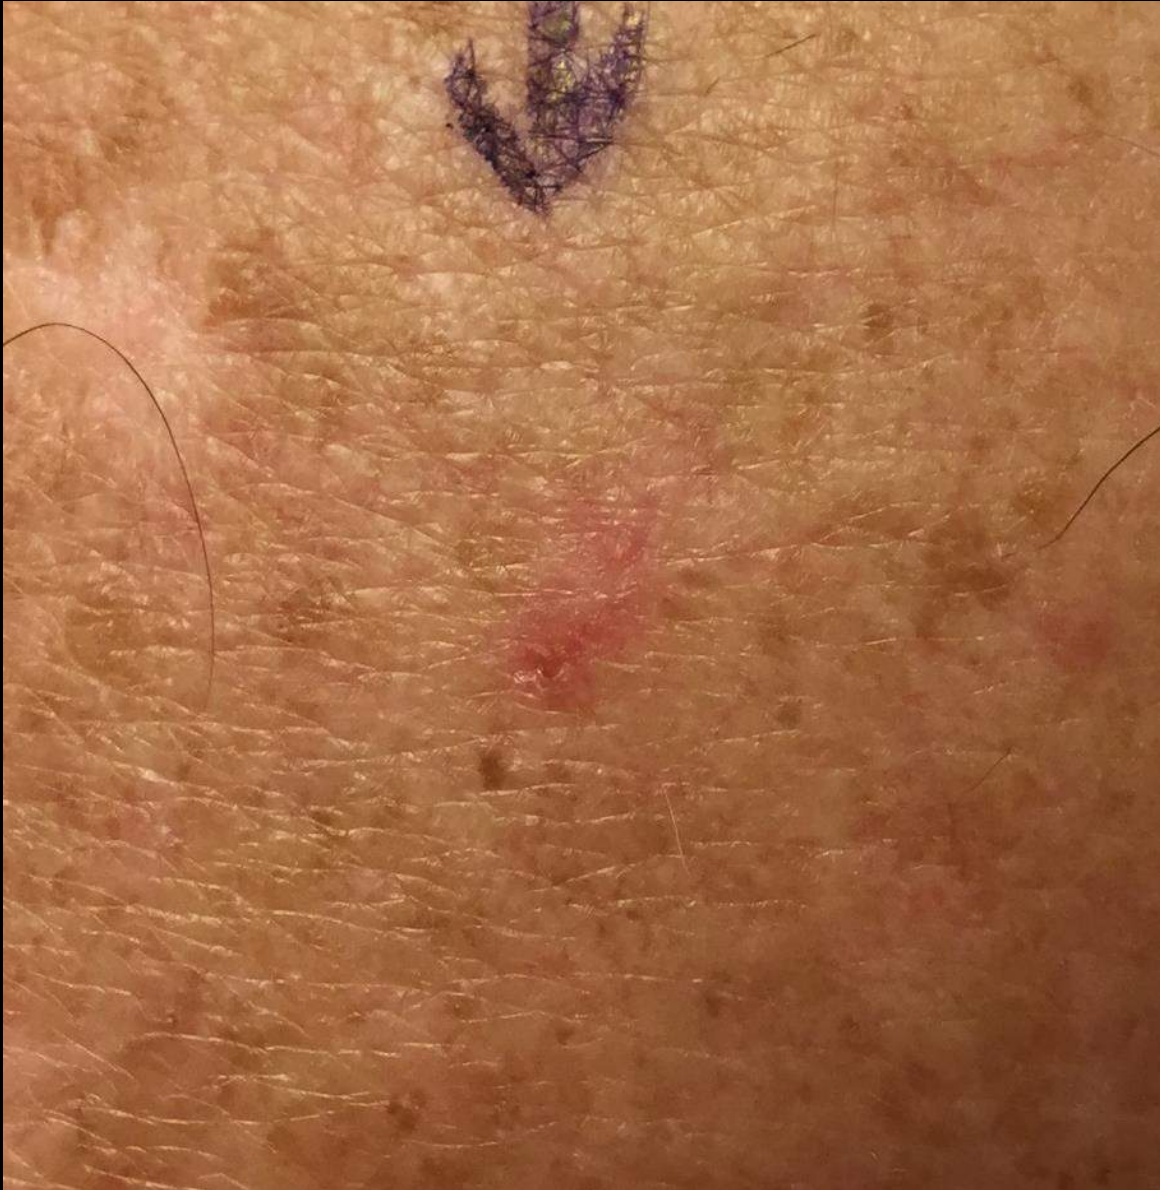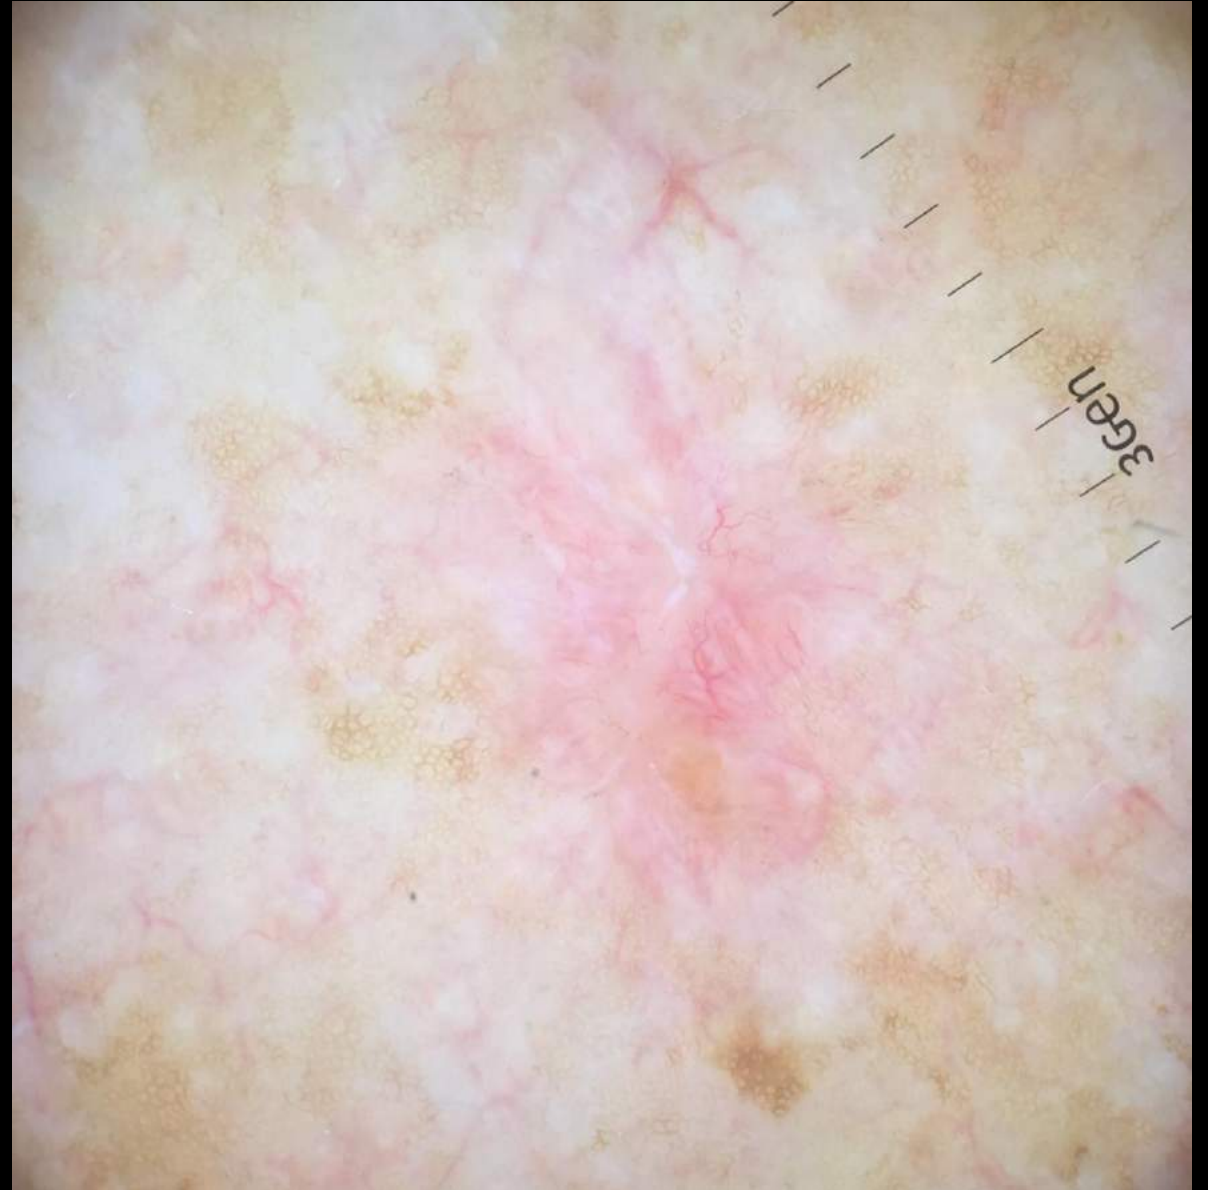

Case number 7



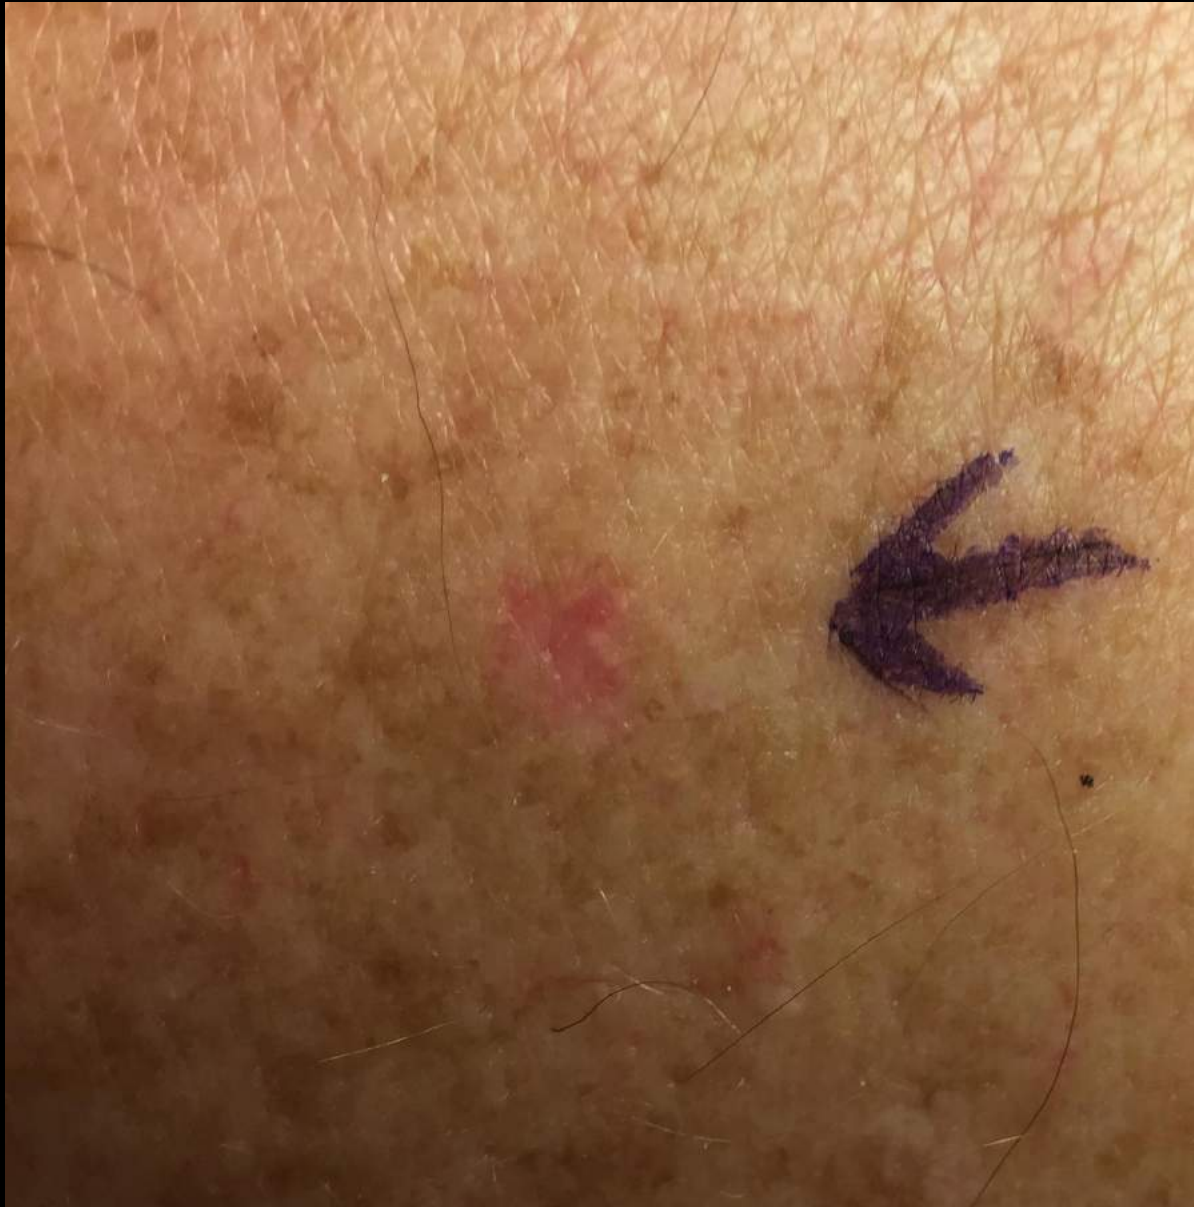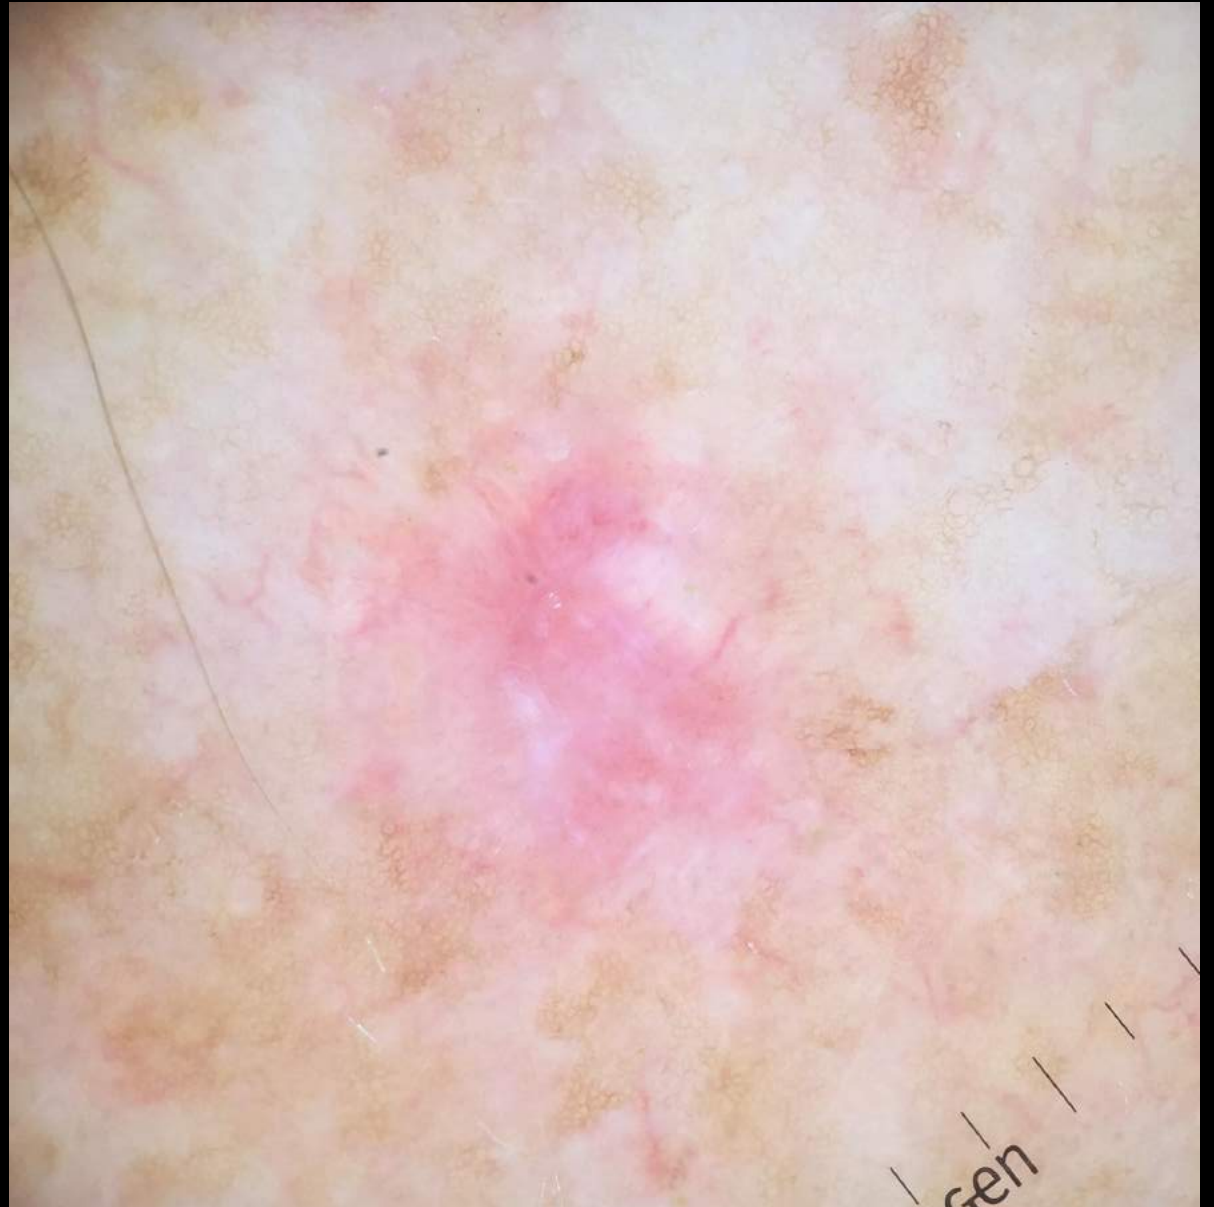

Case number 8



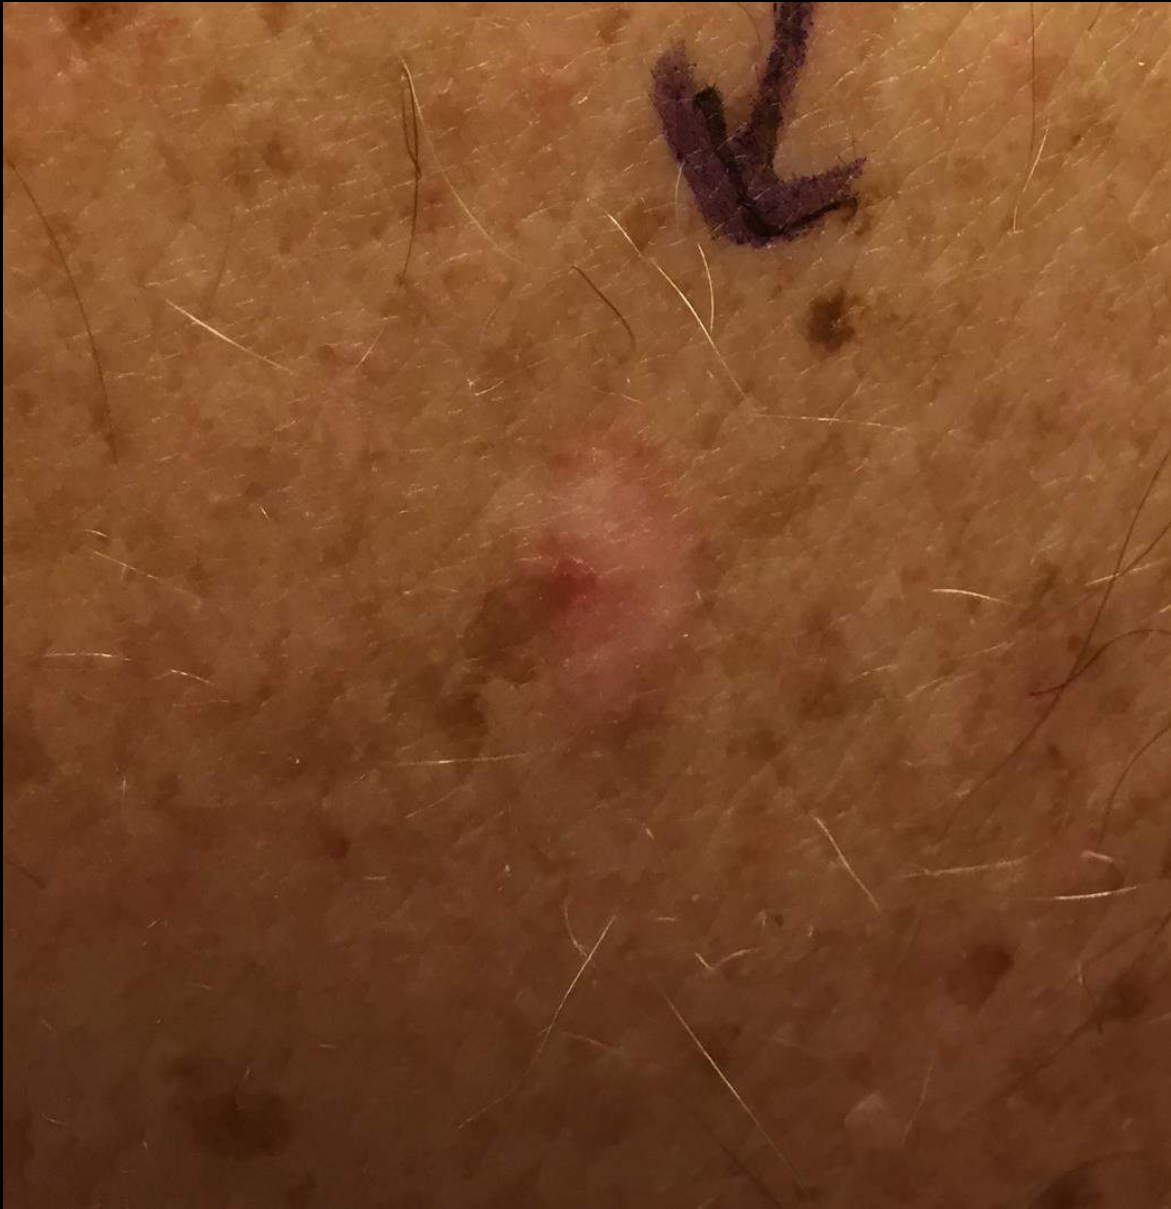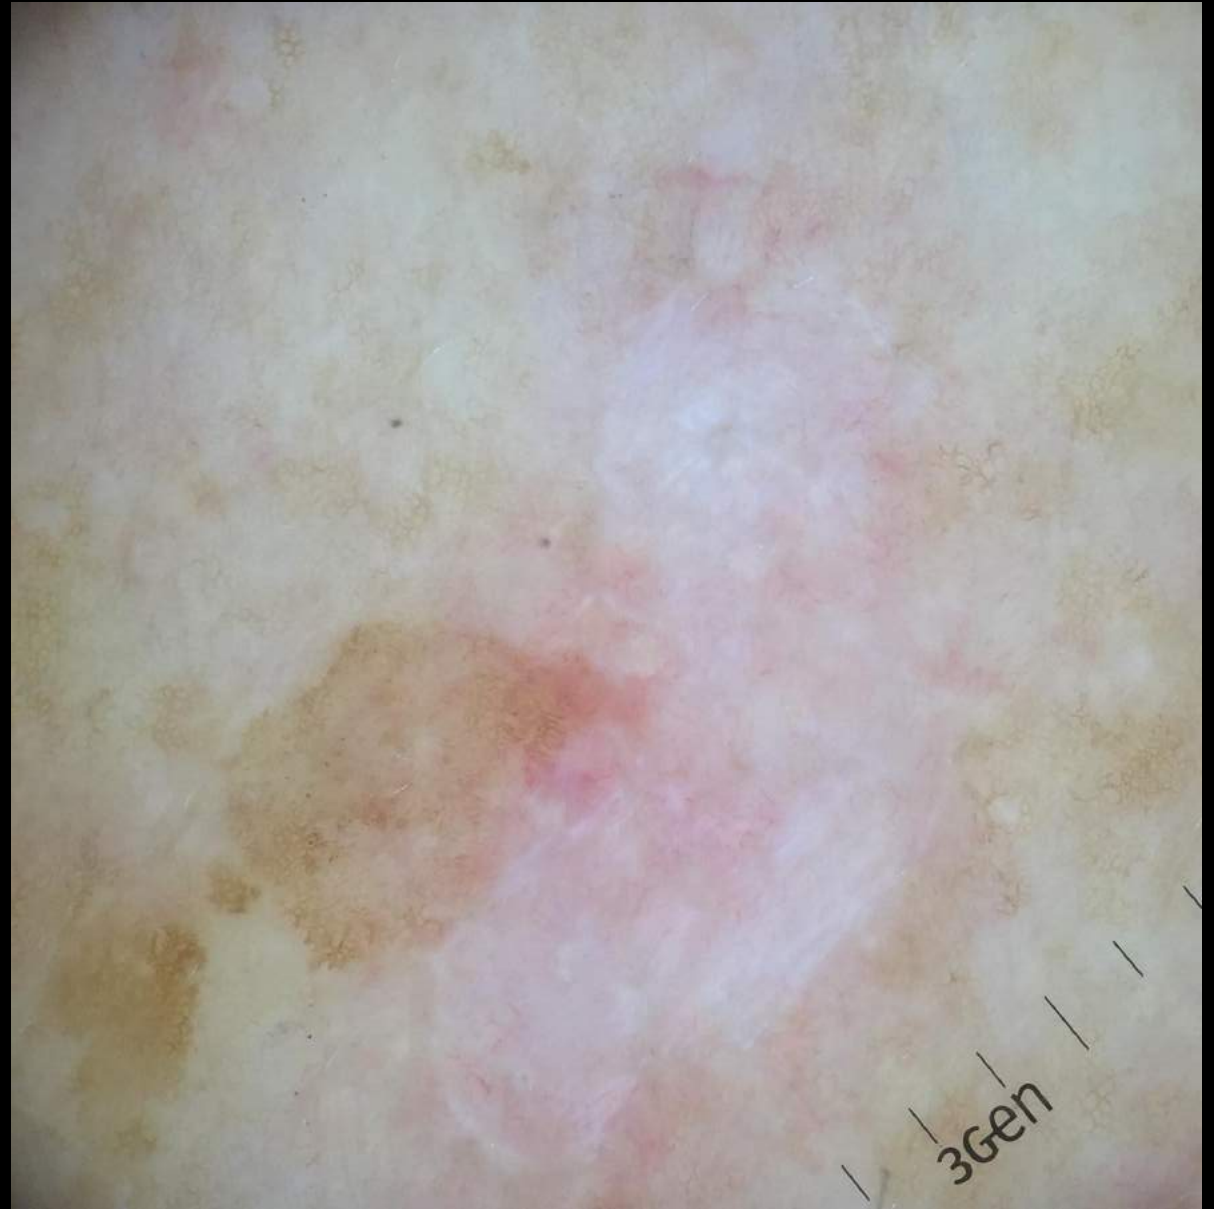

Case number 9



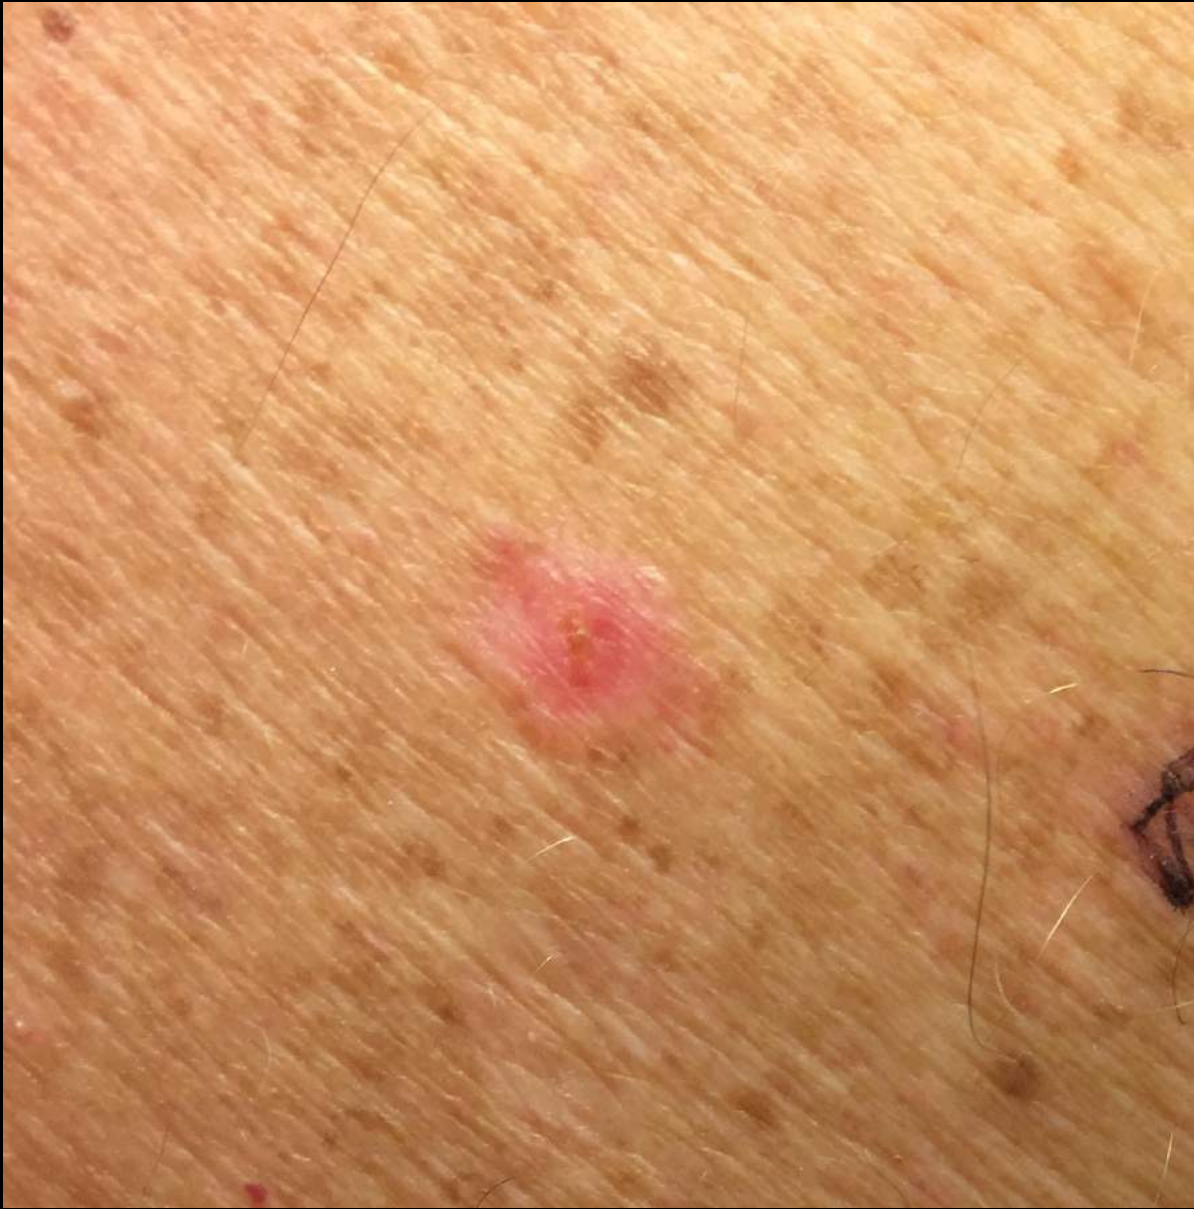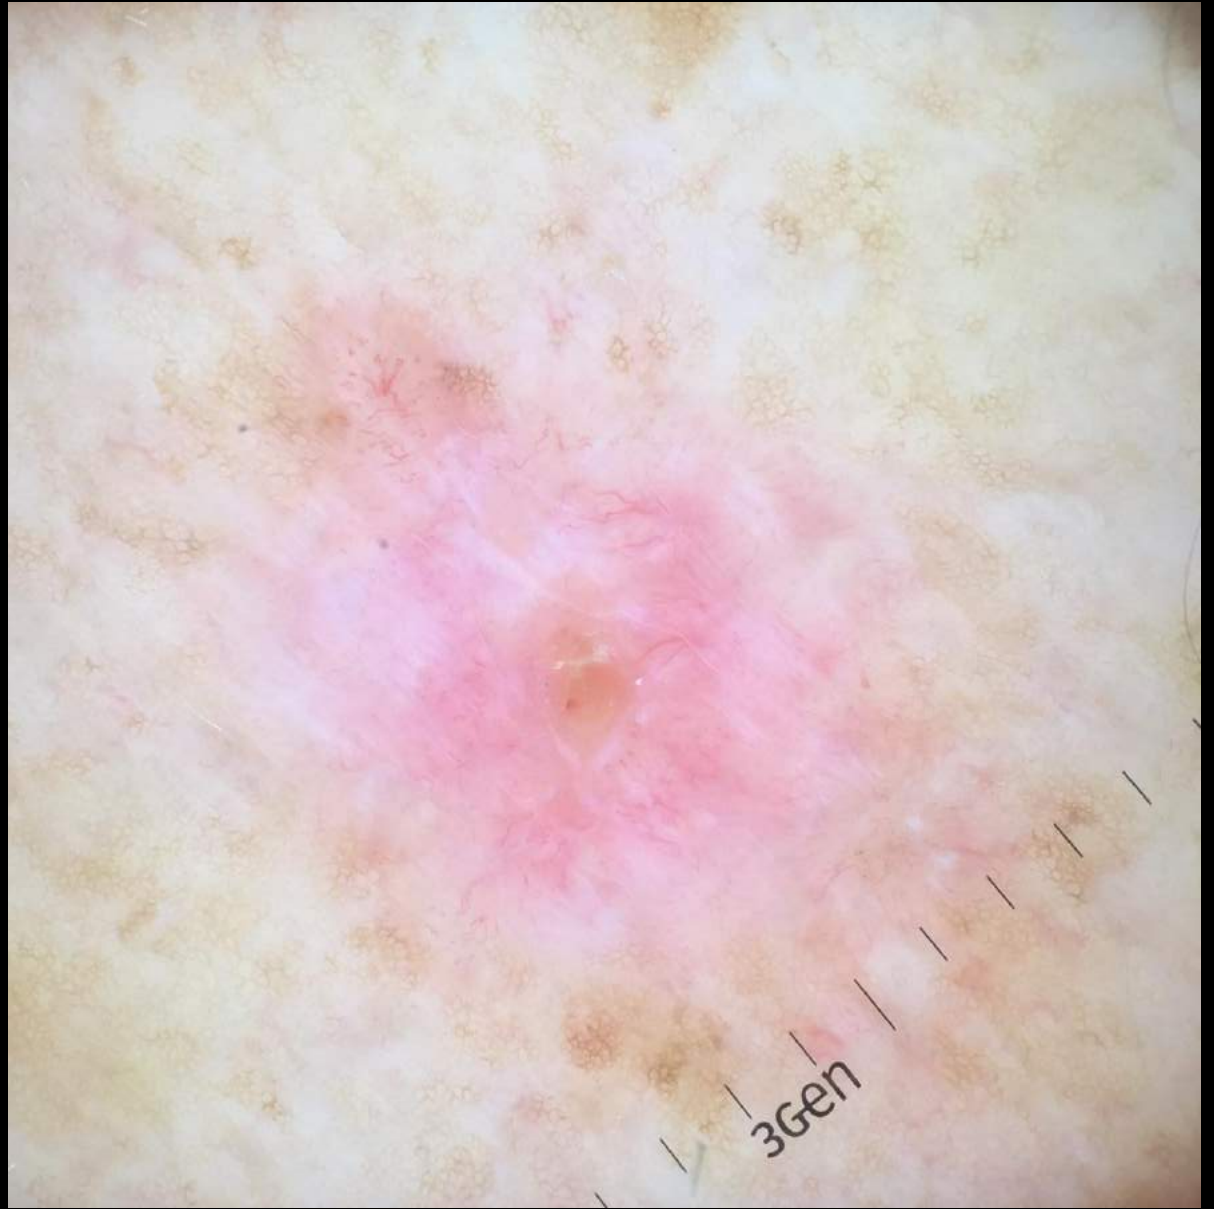

Case number 10



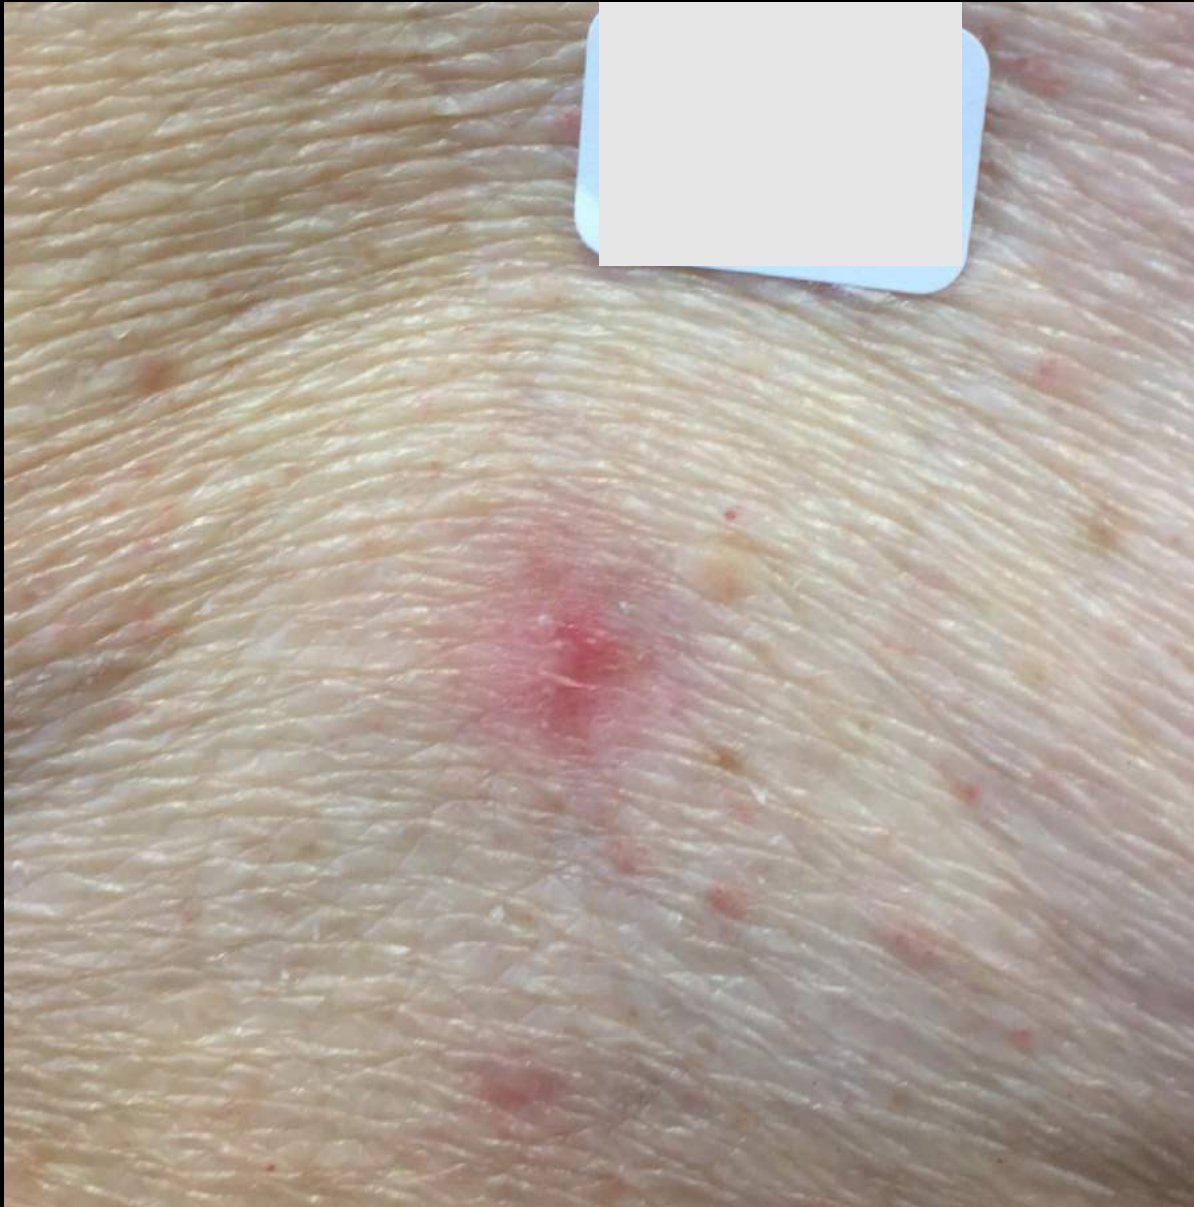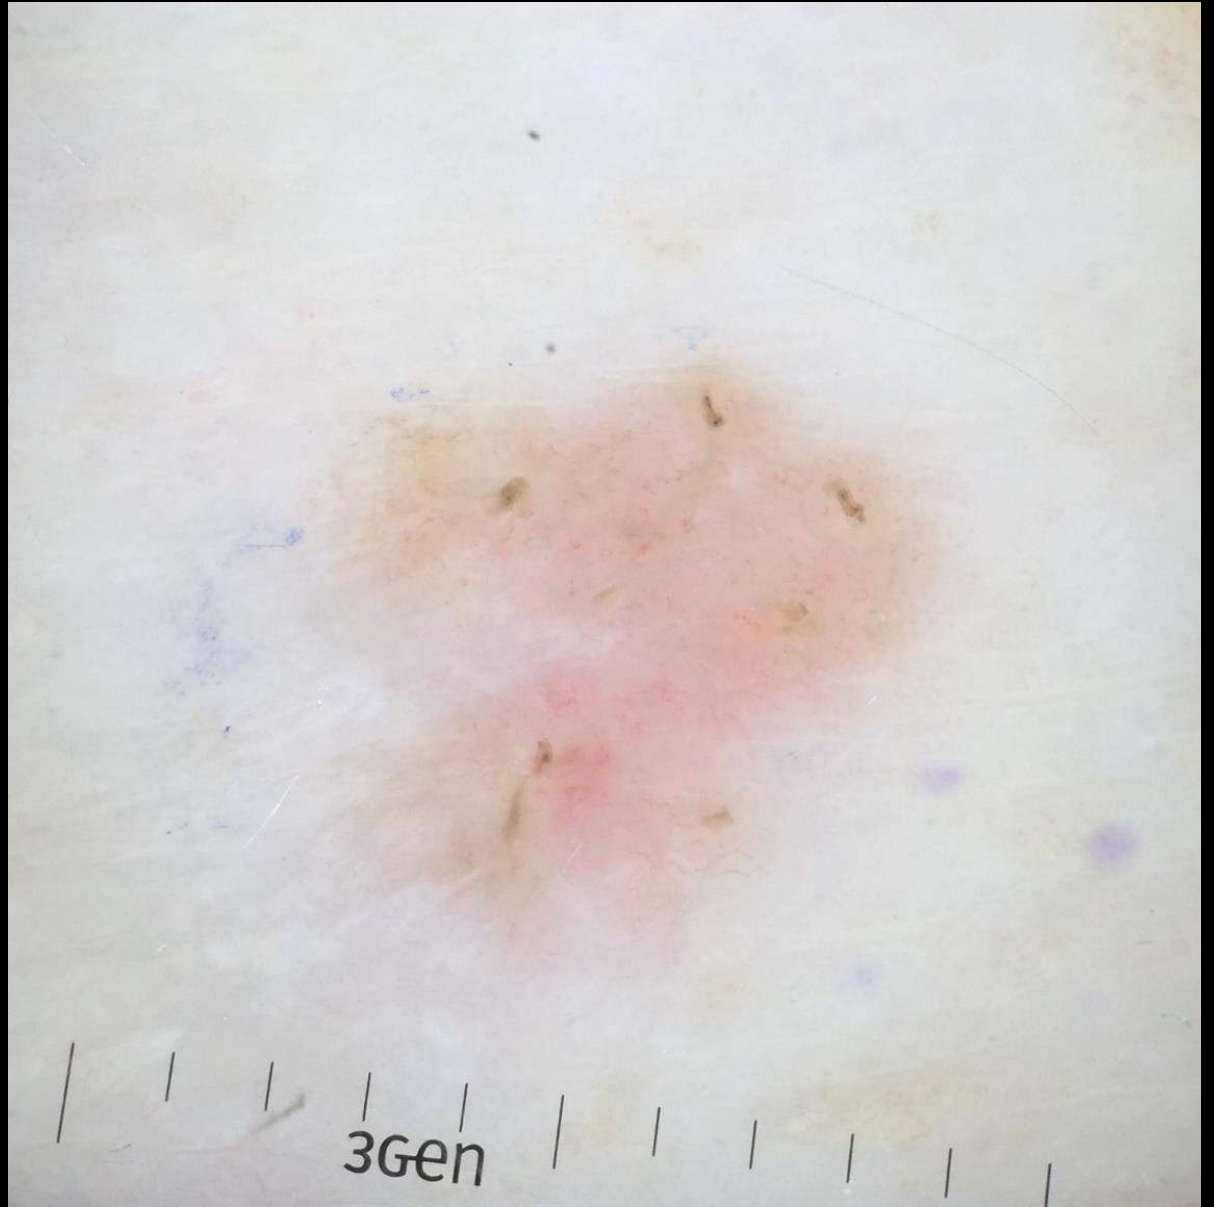

Case number 11



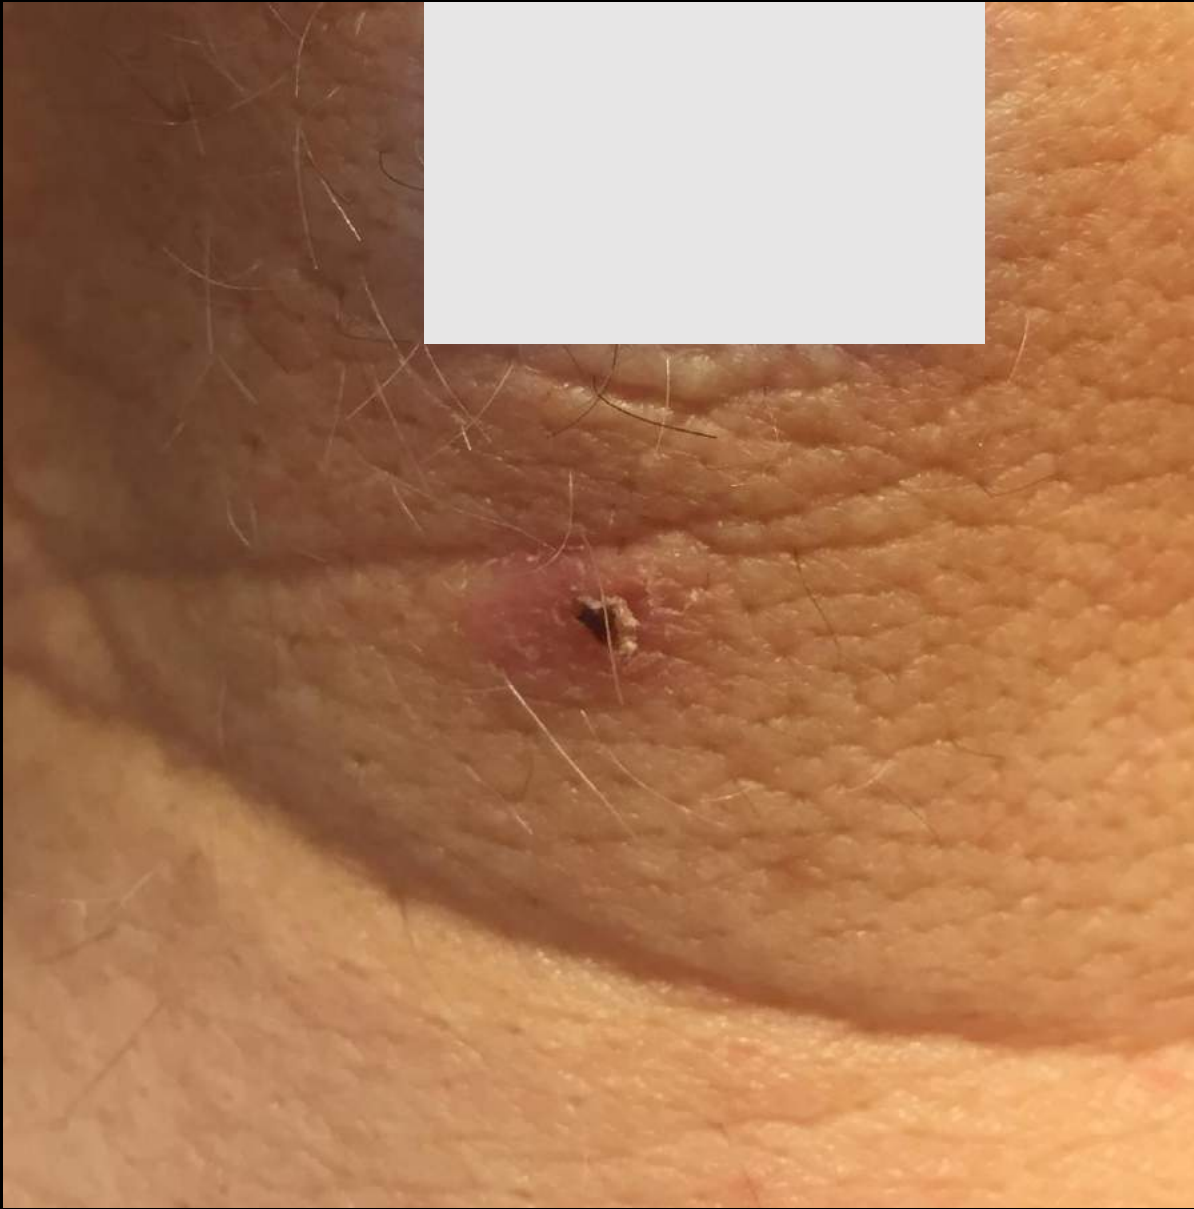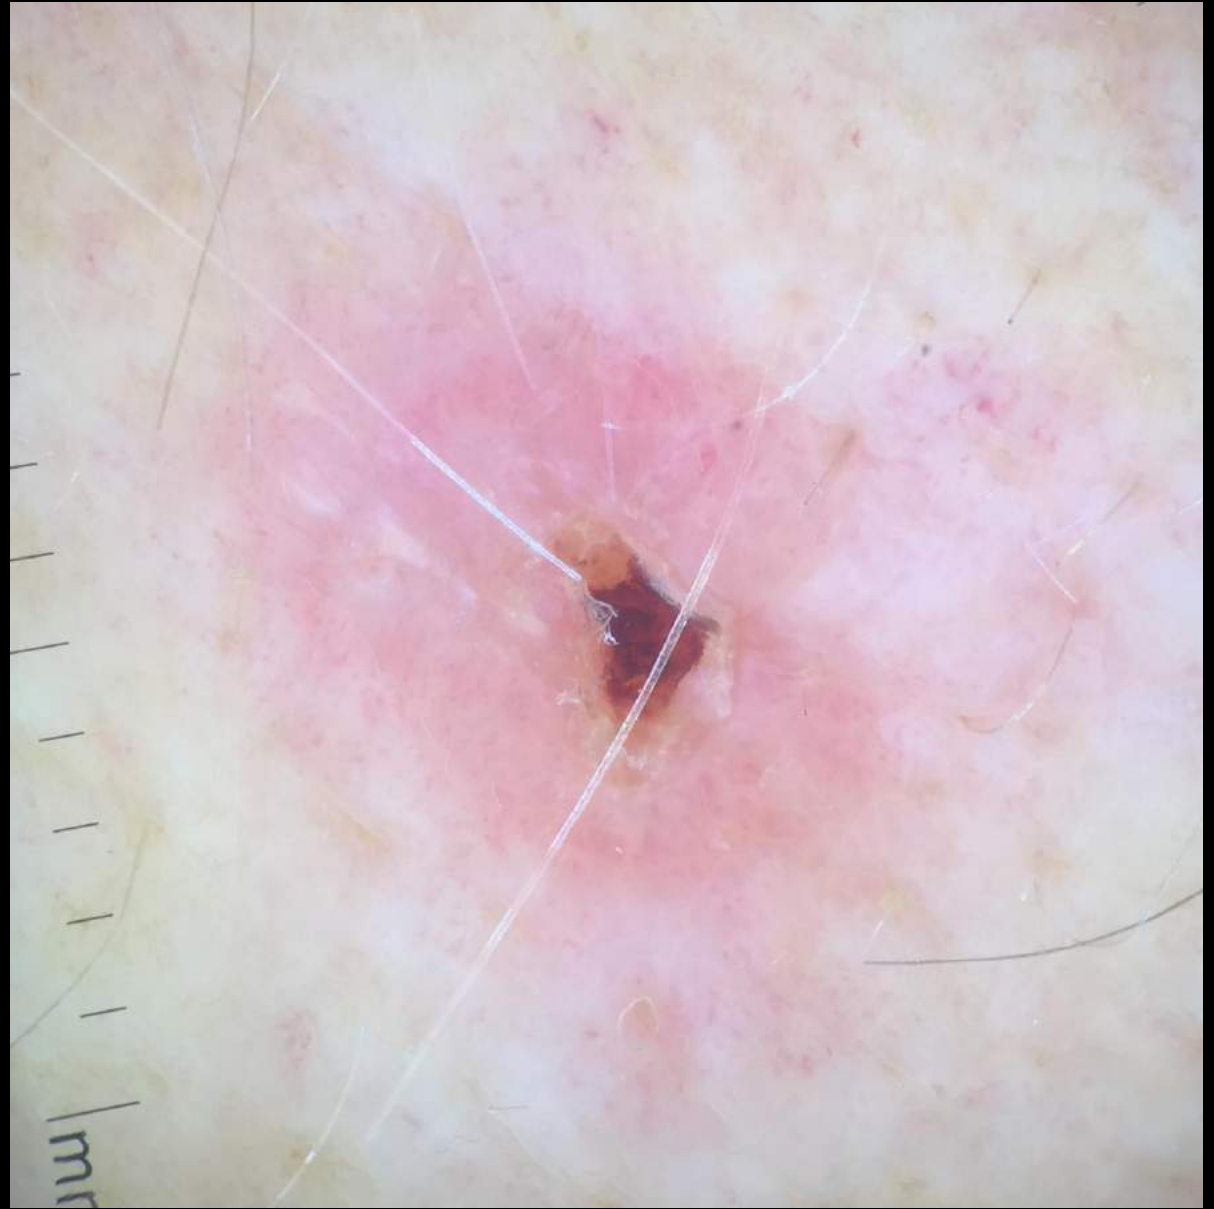

Case number 12



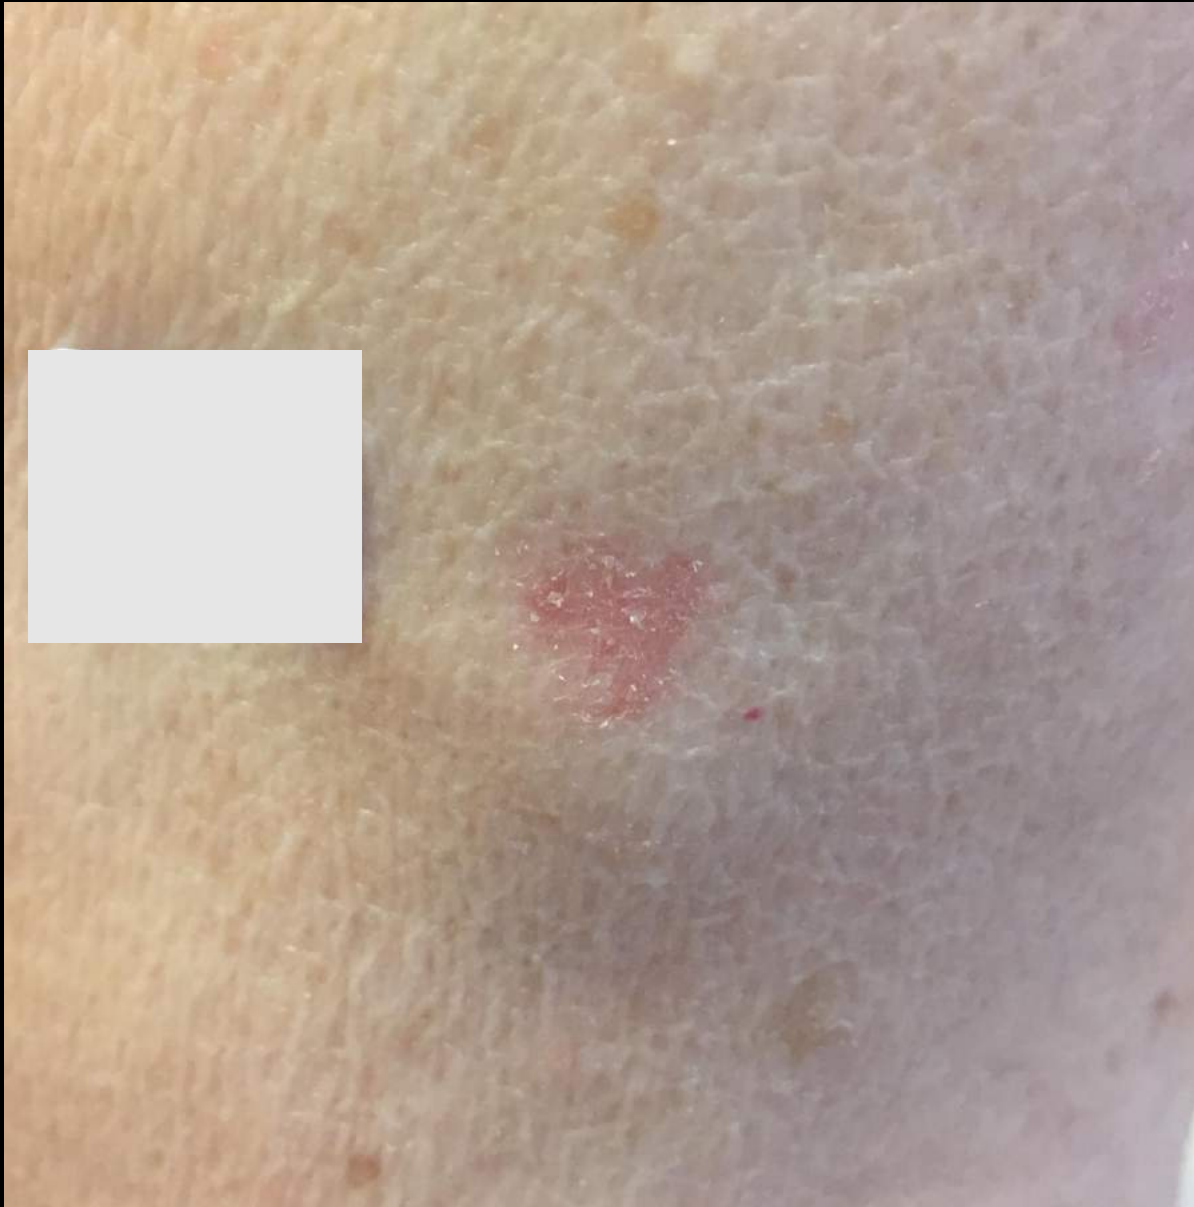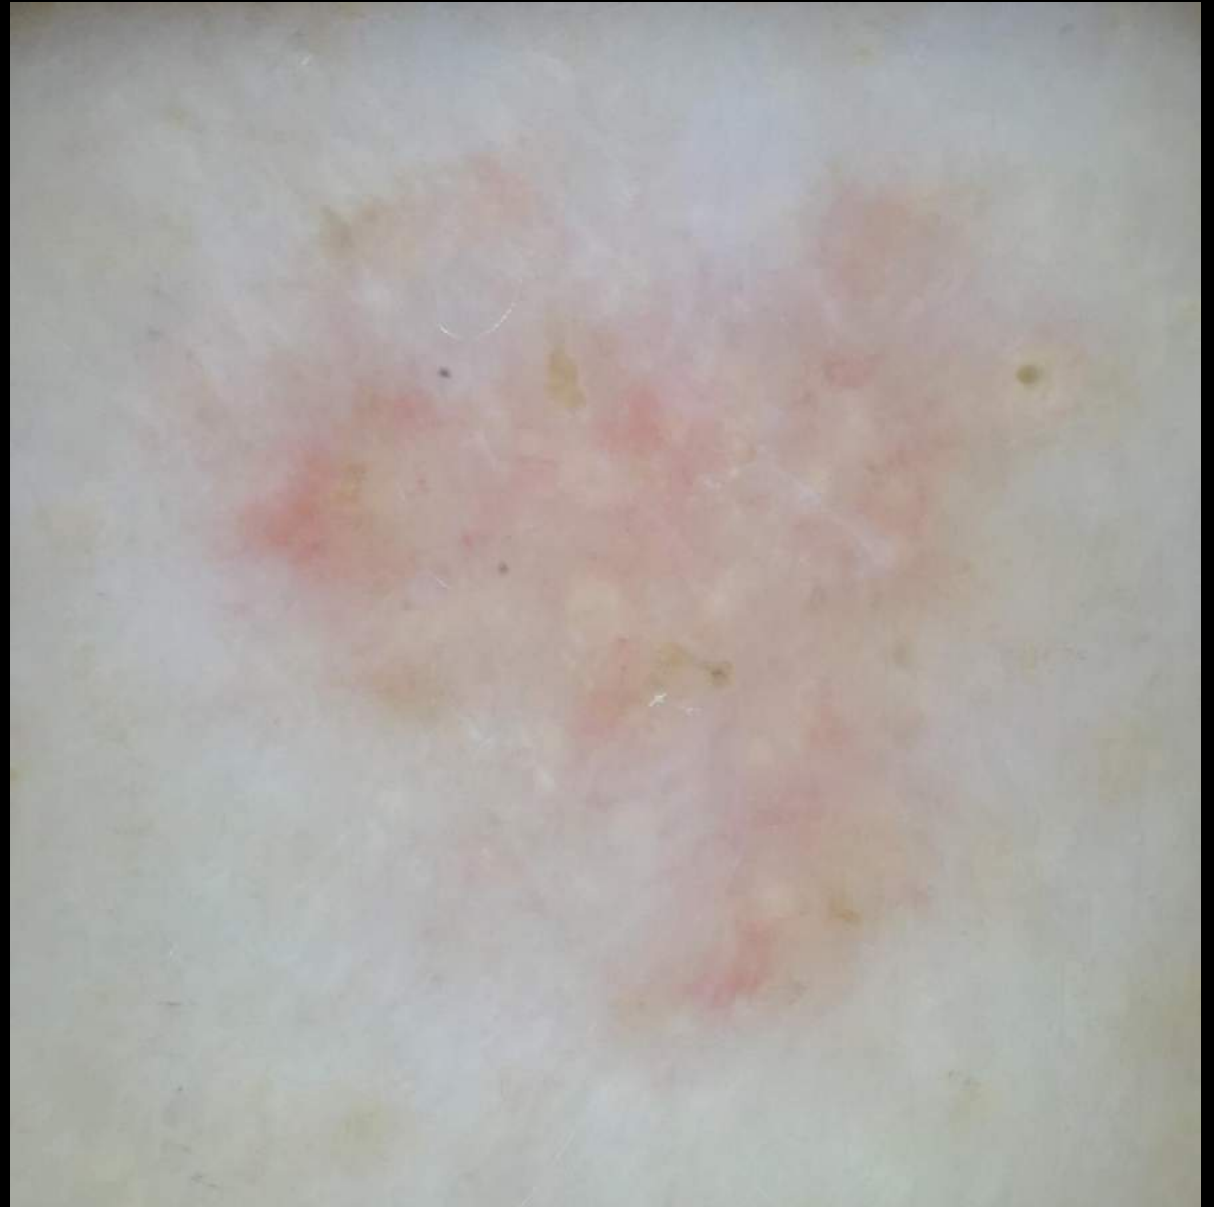

Case number 13



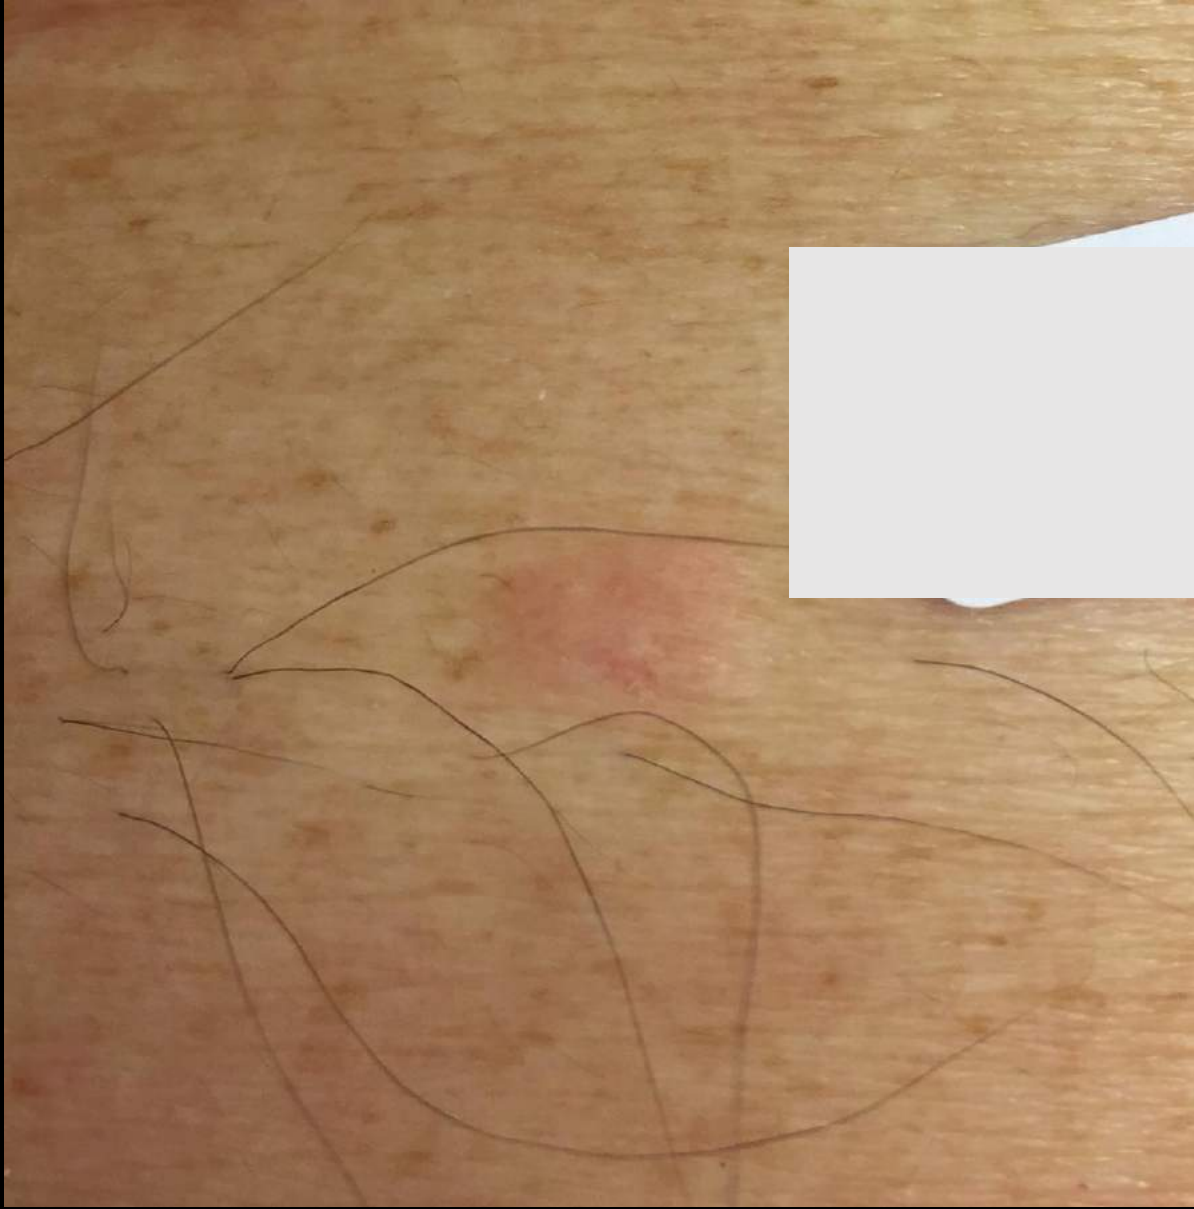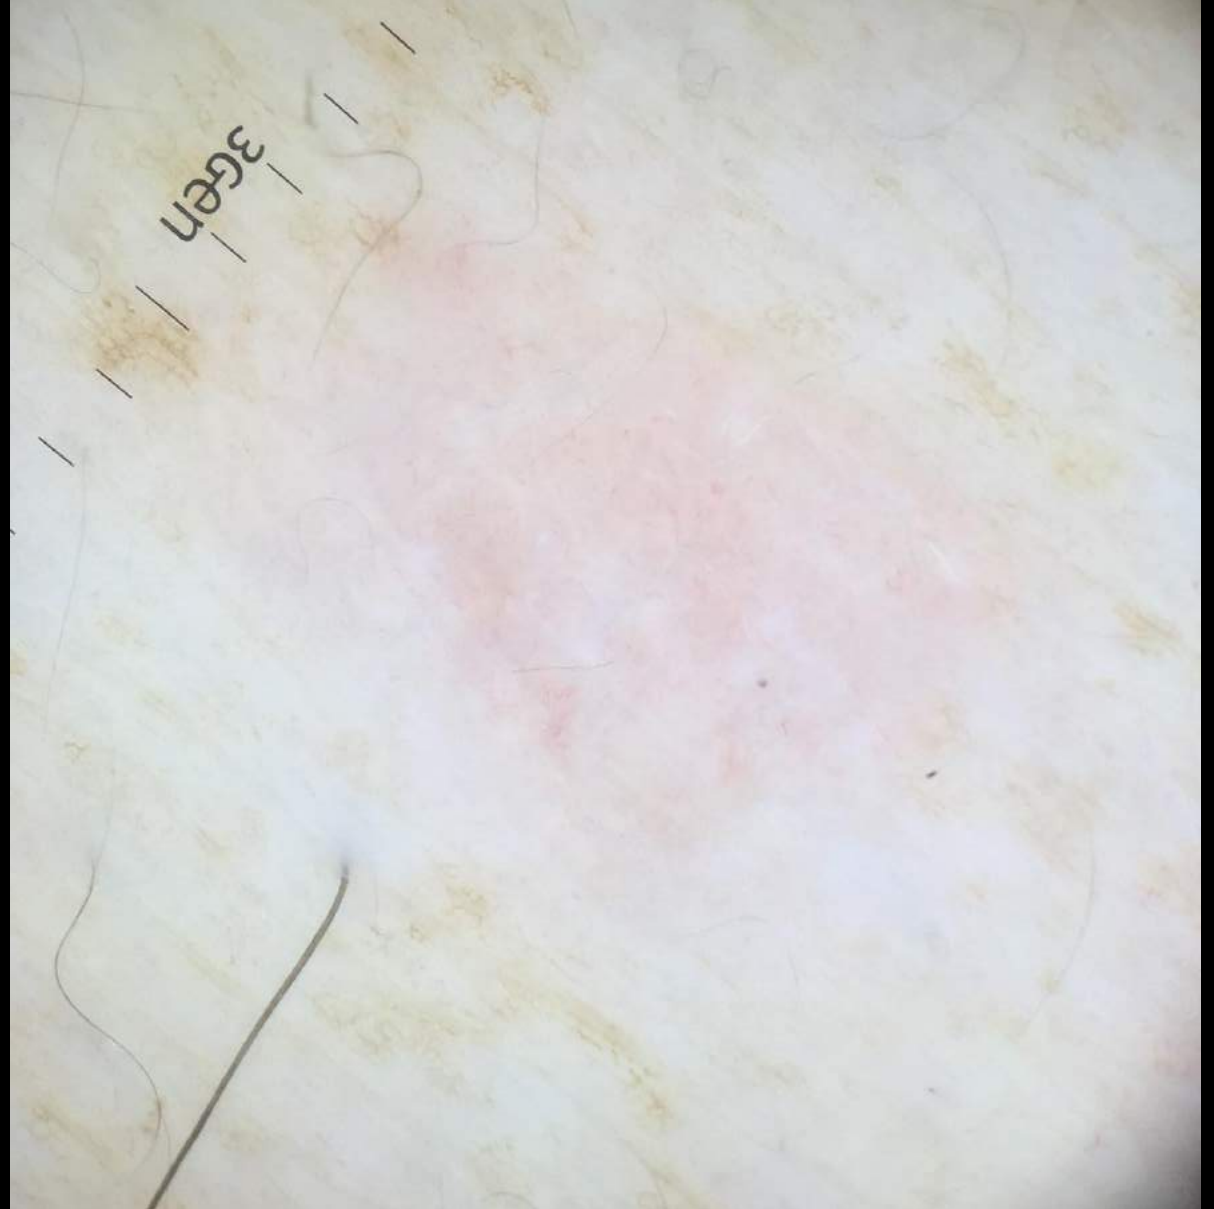

Case number 14

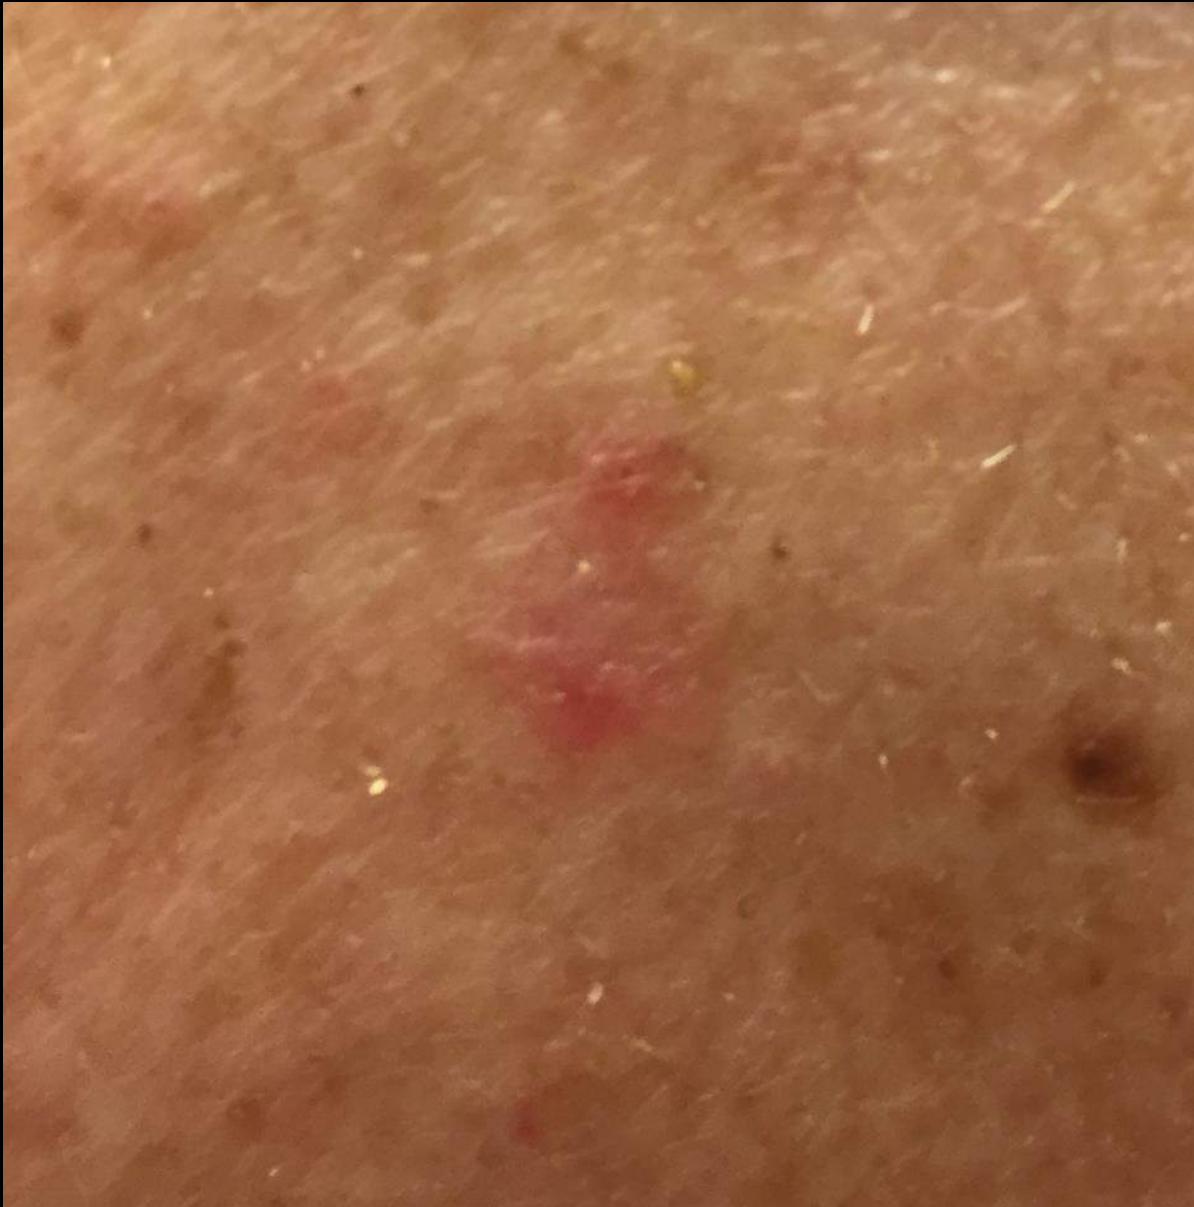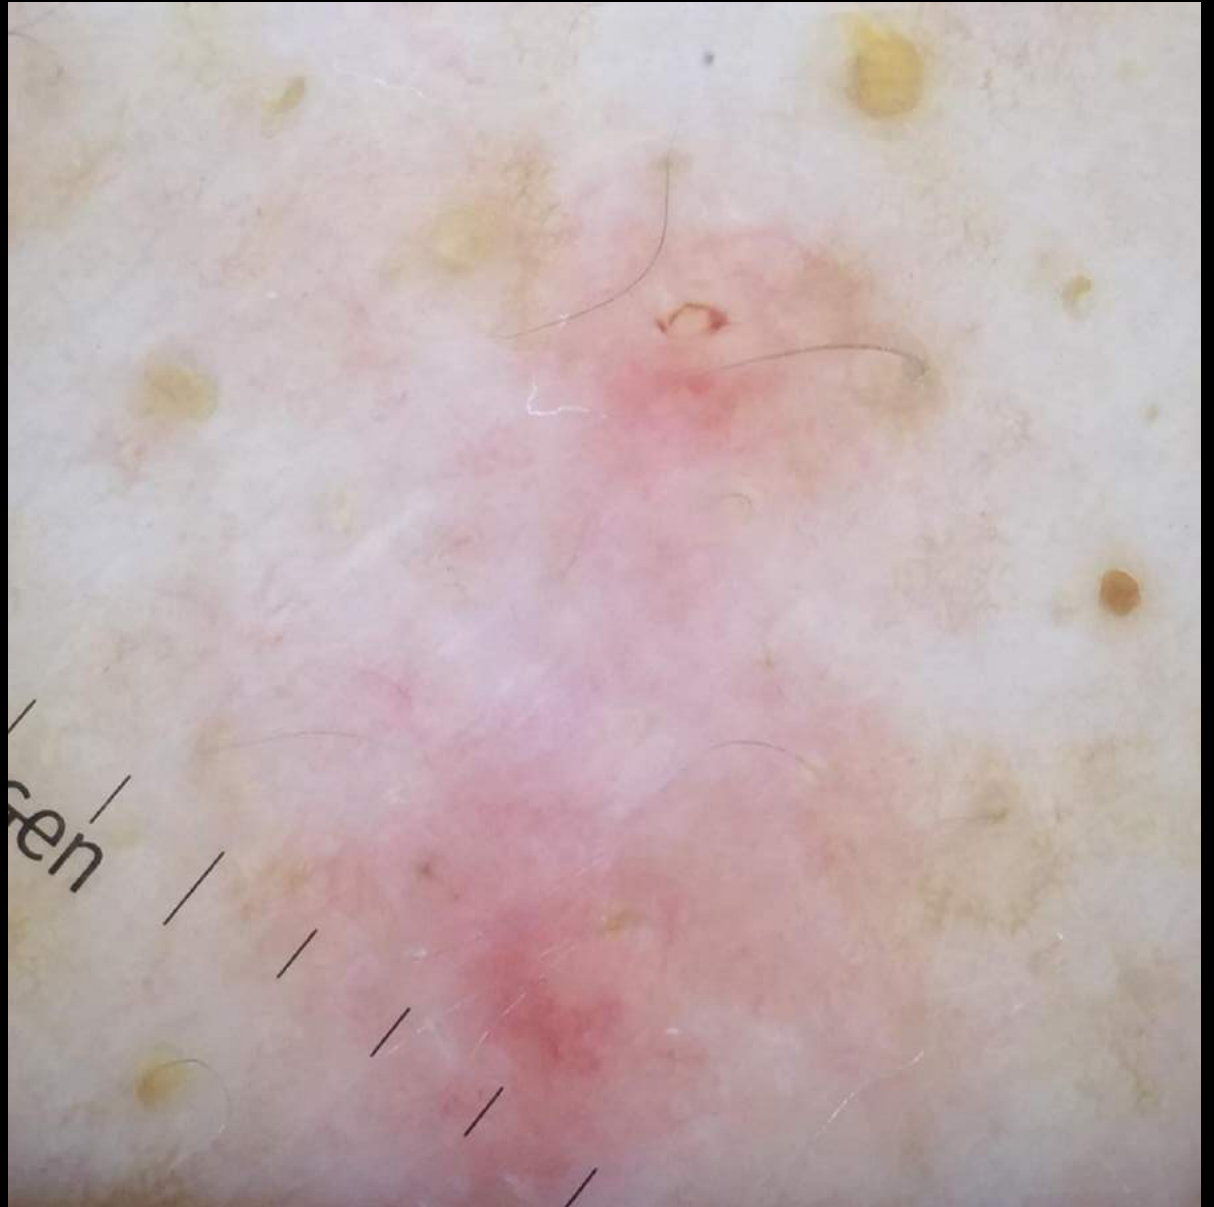

Case number 15



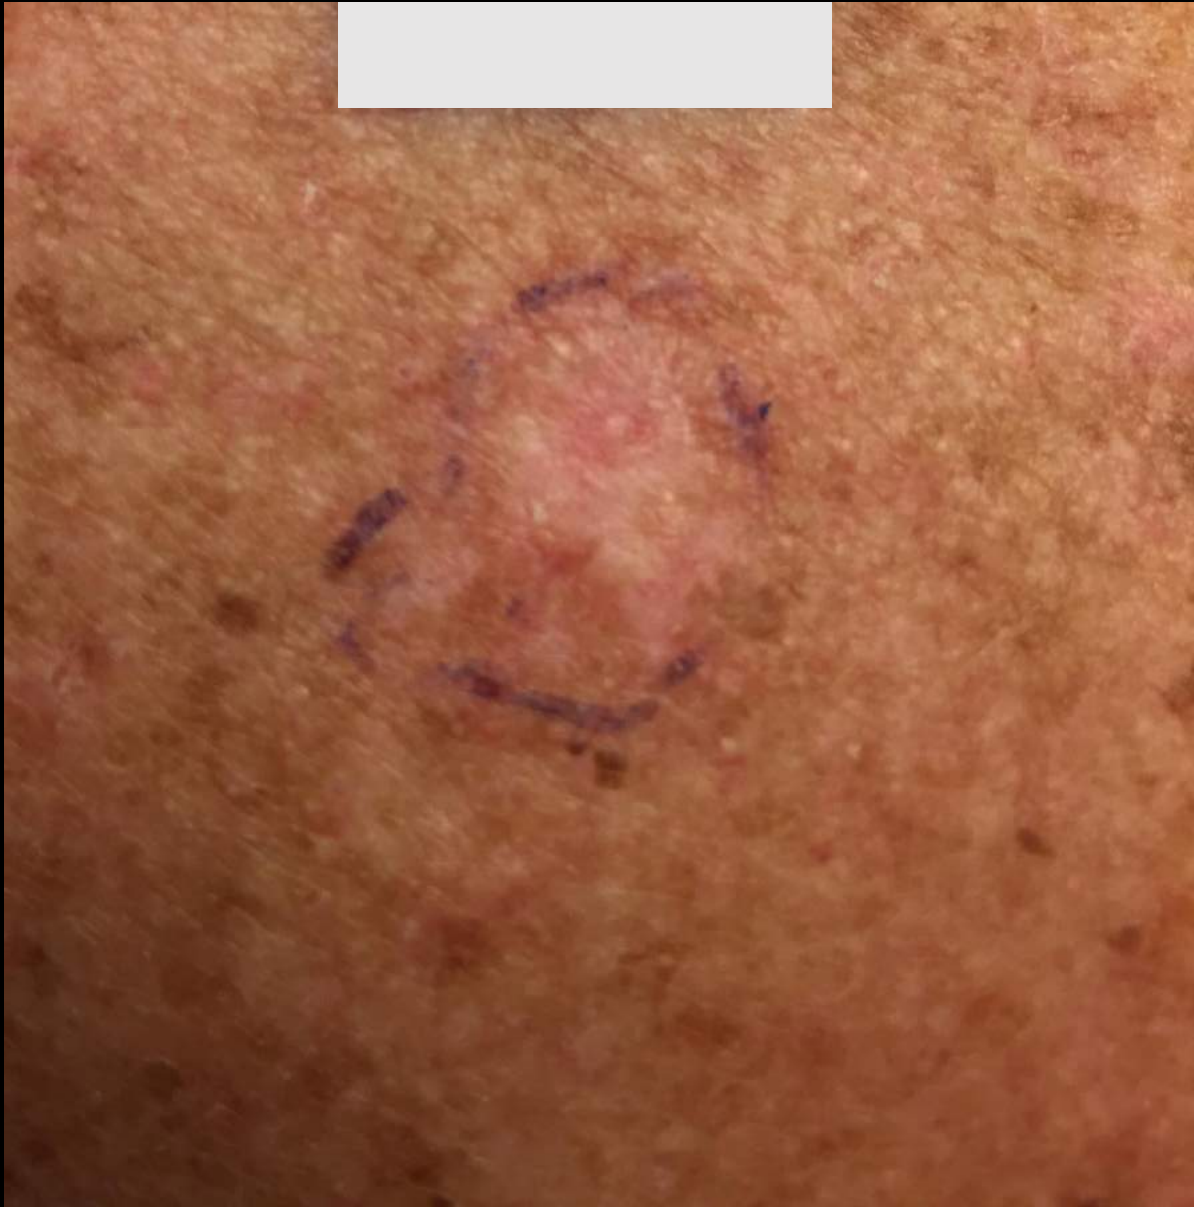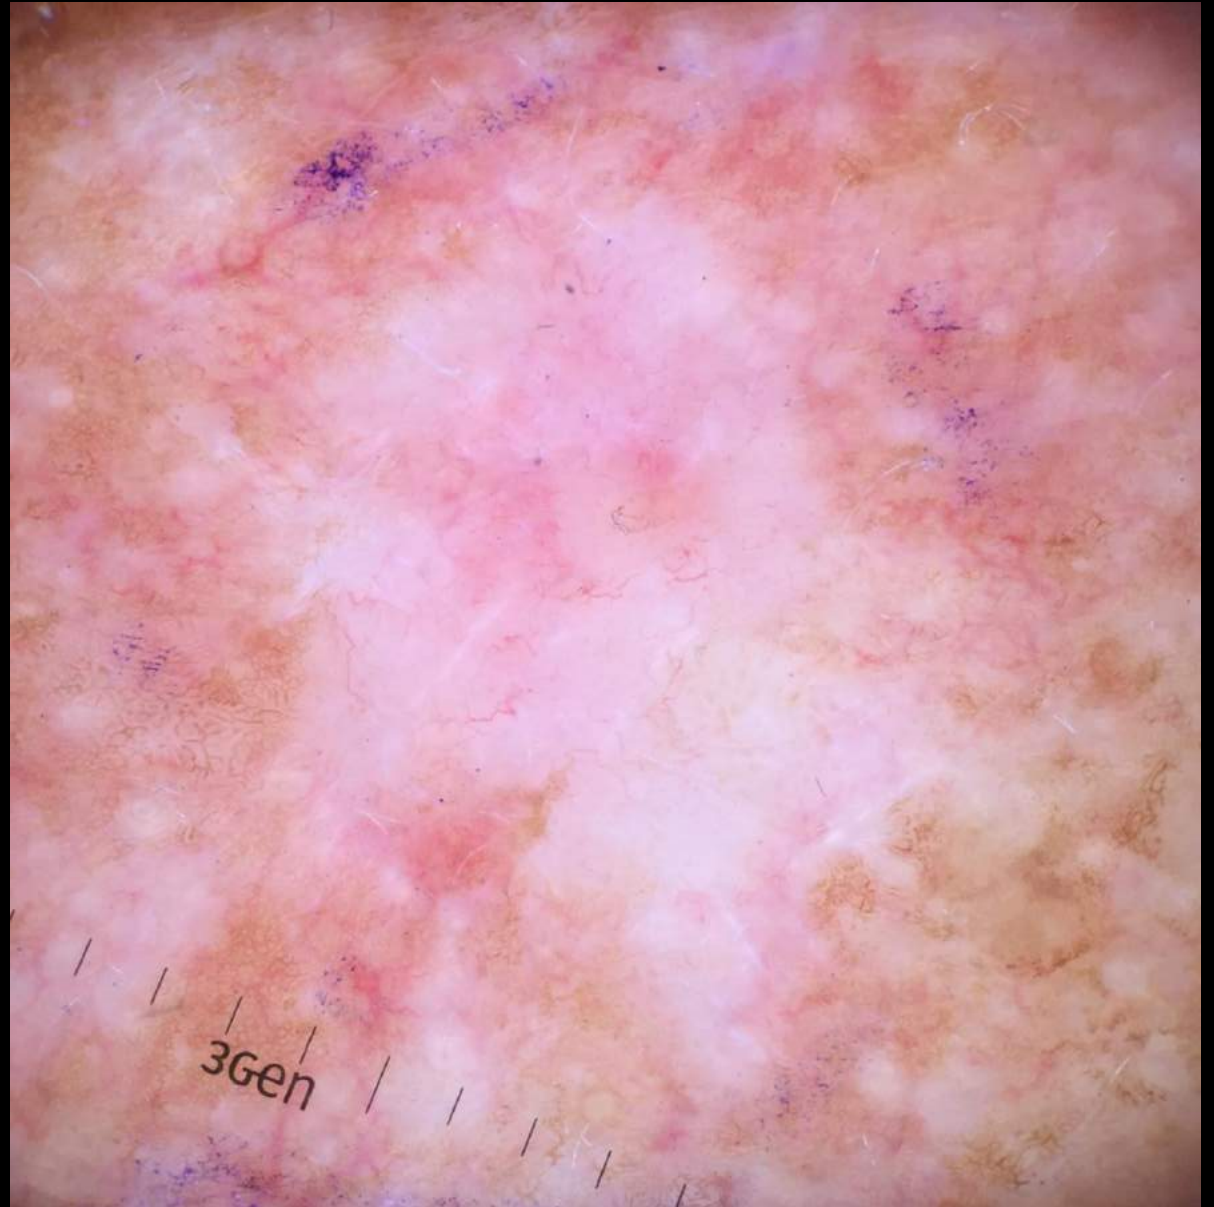

Case number 16



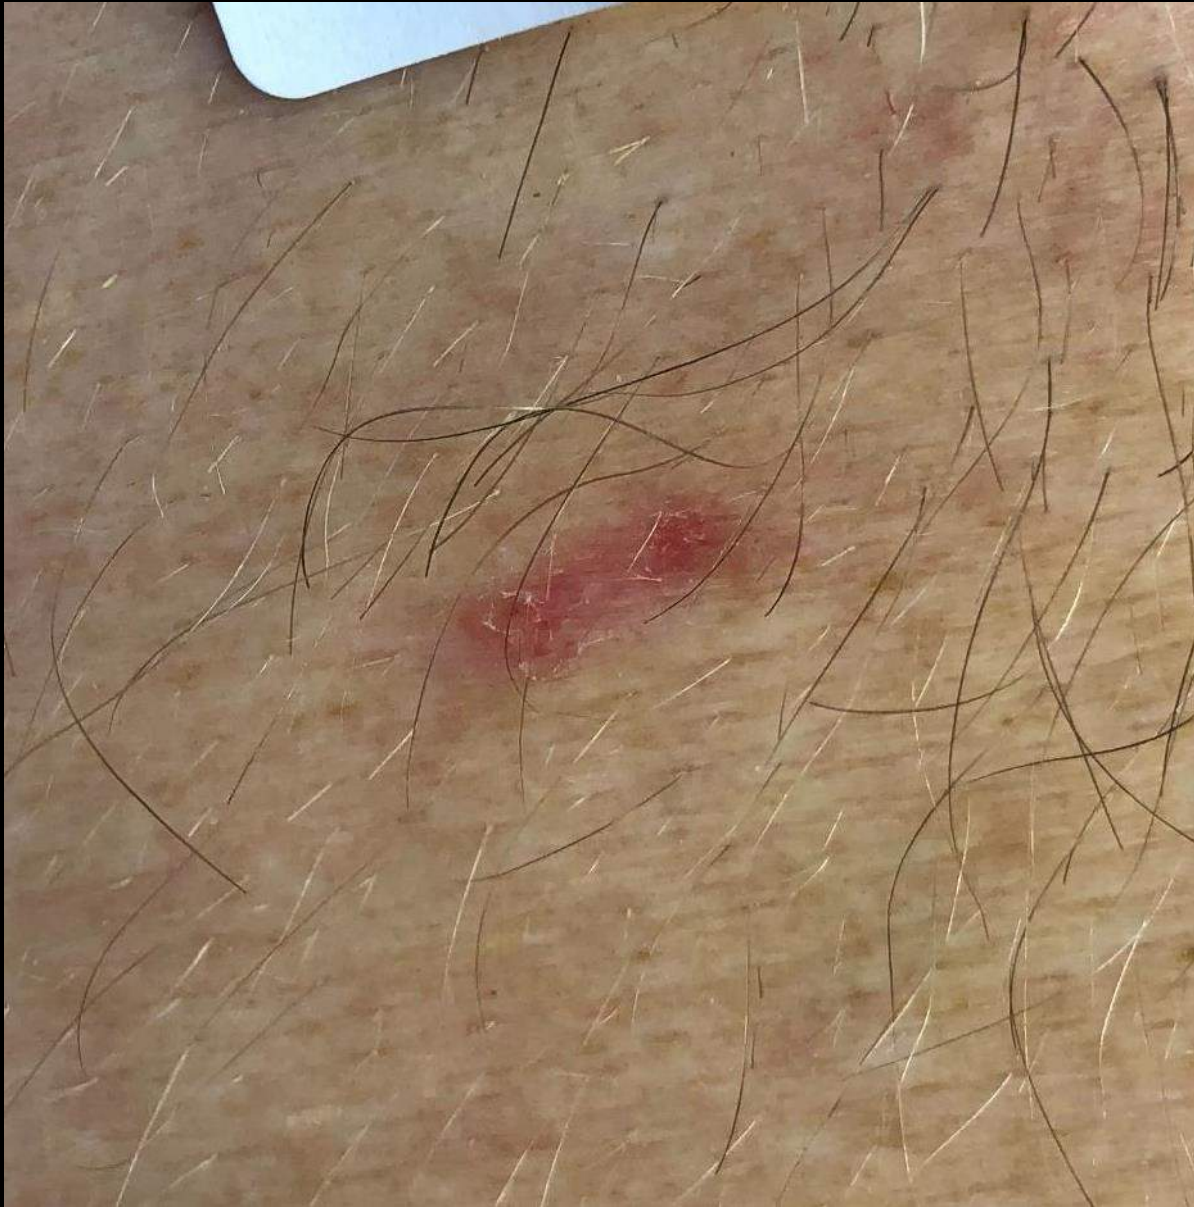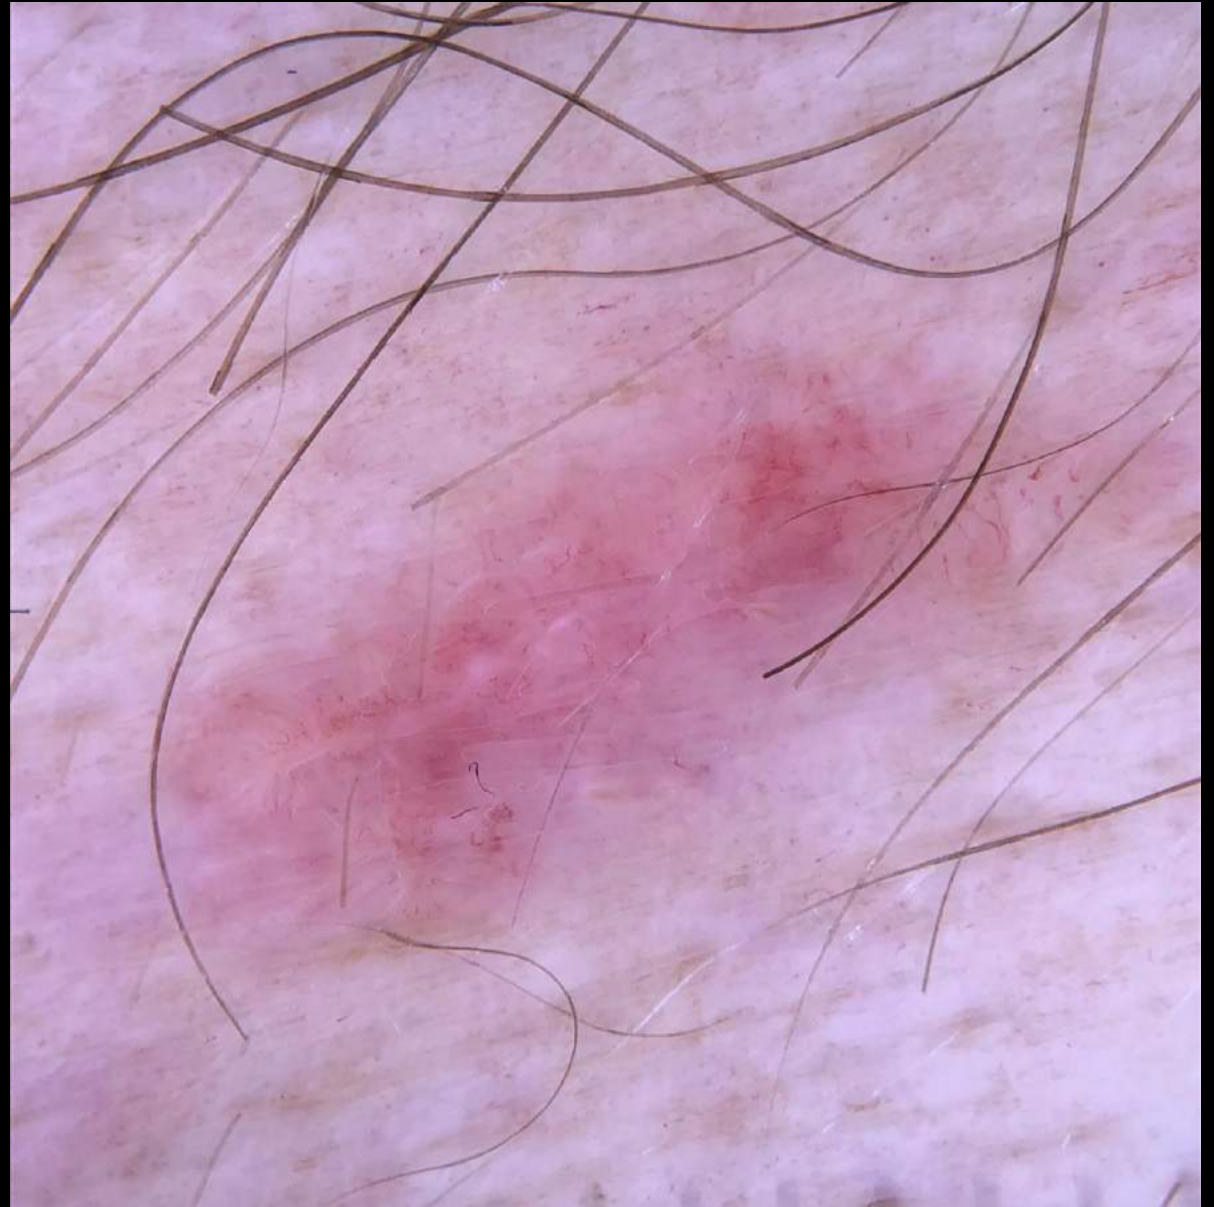

Case number 17



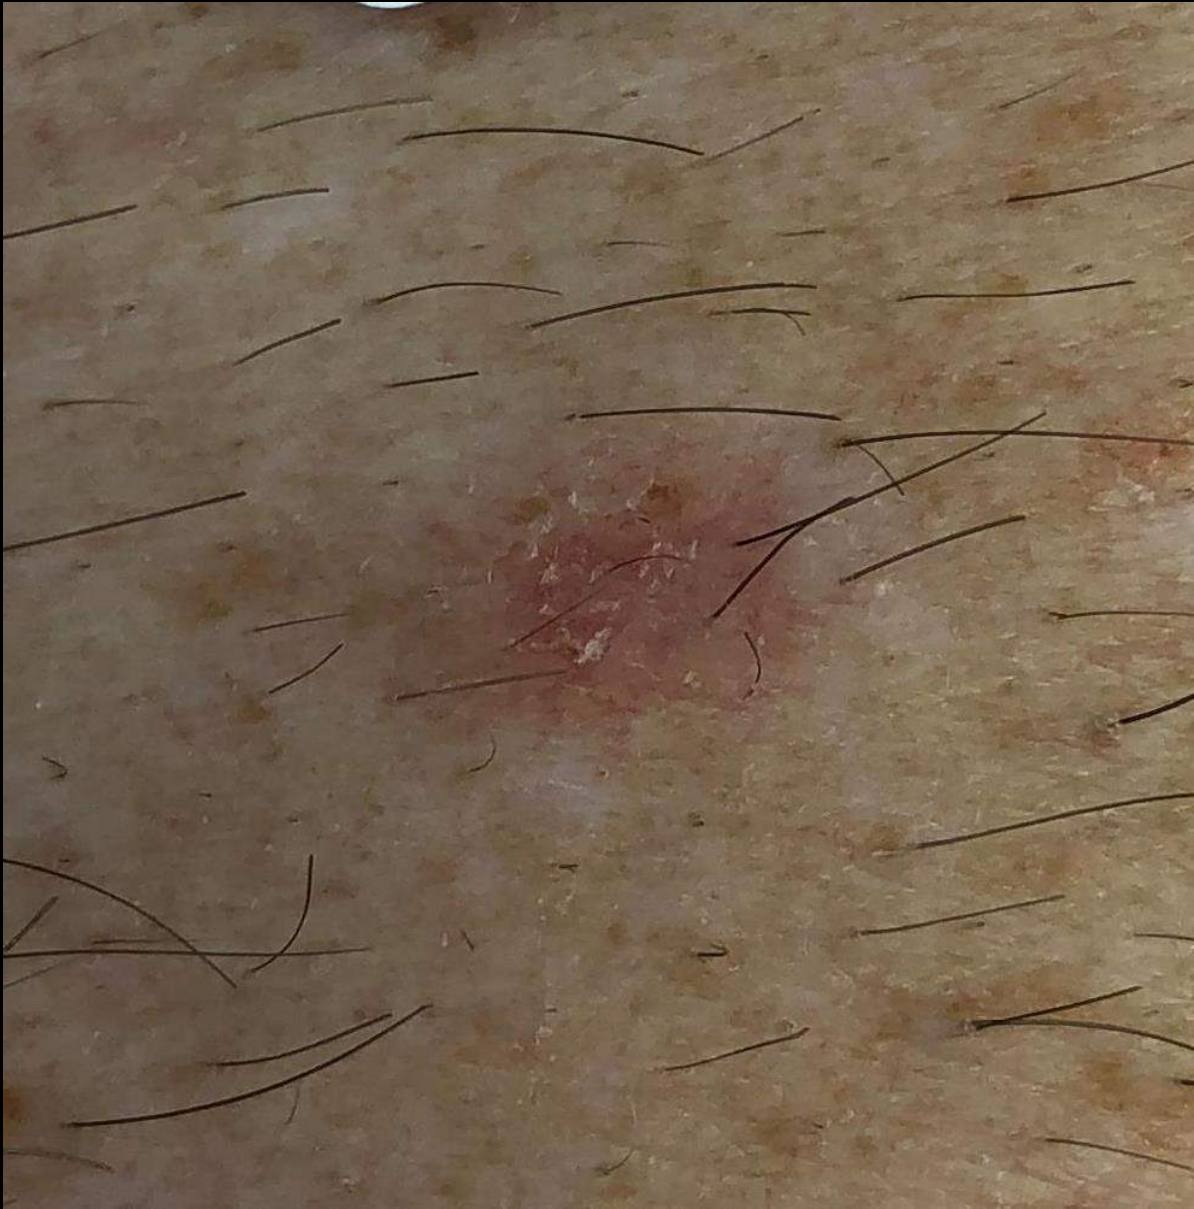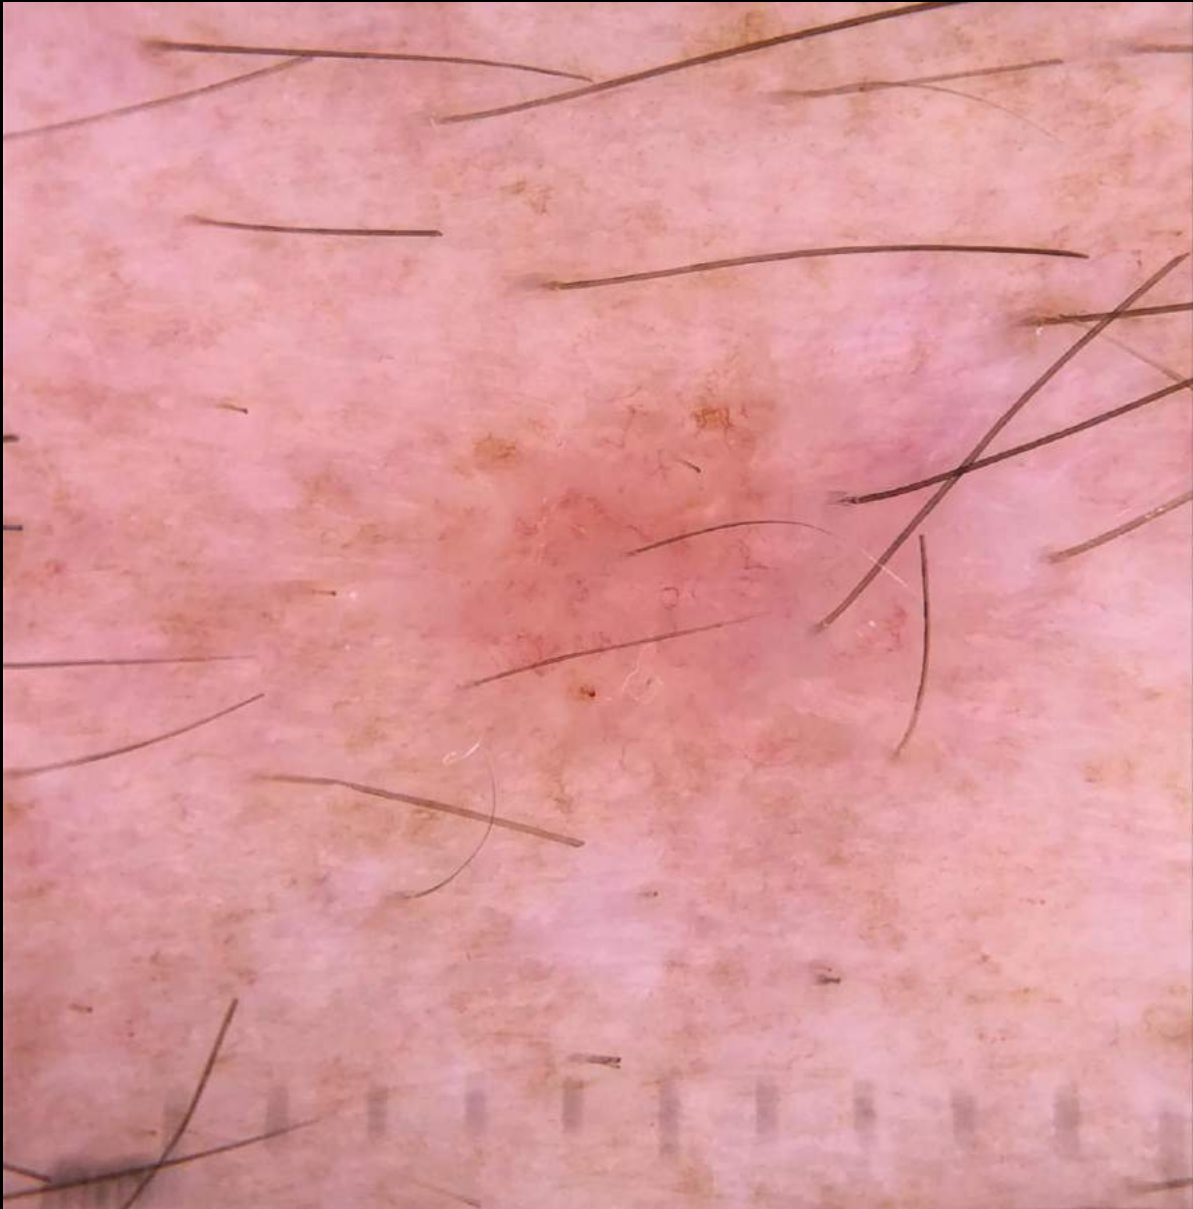

Case number 18



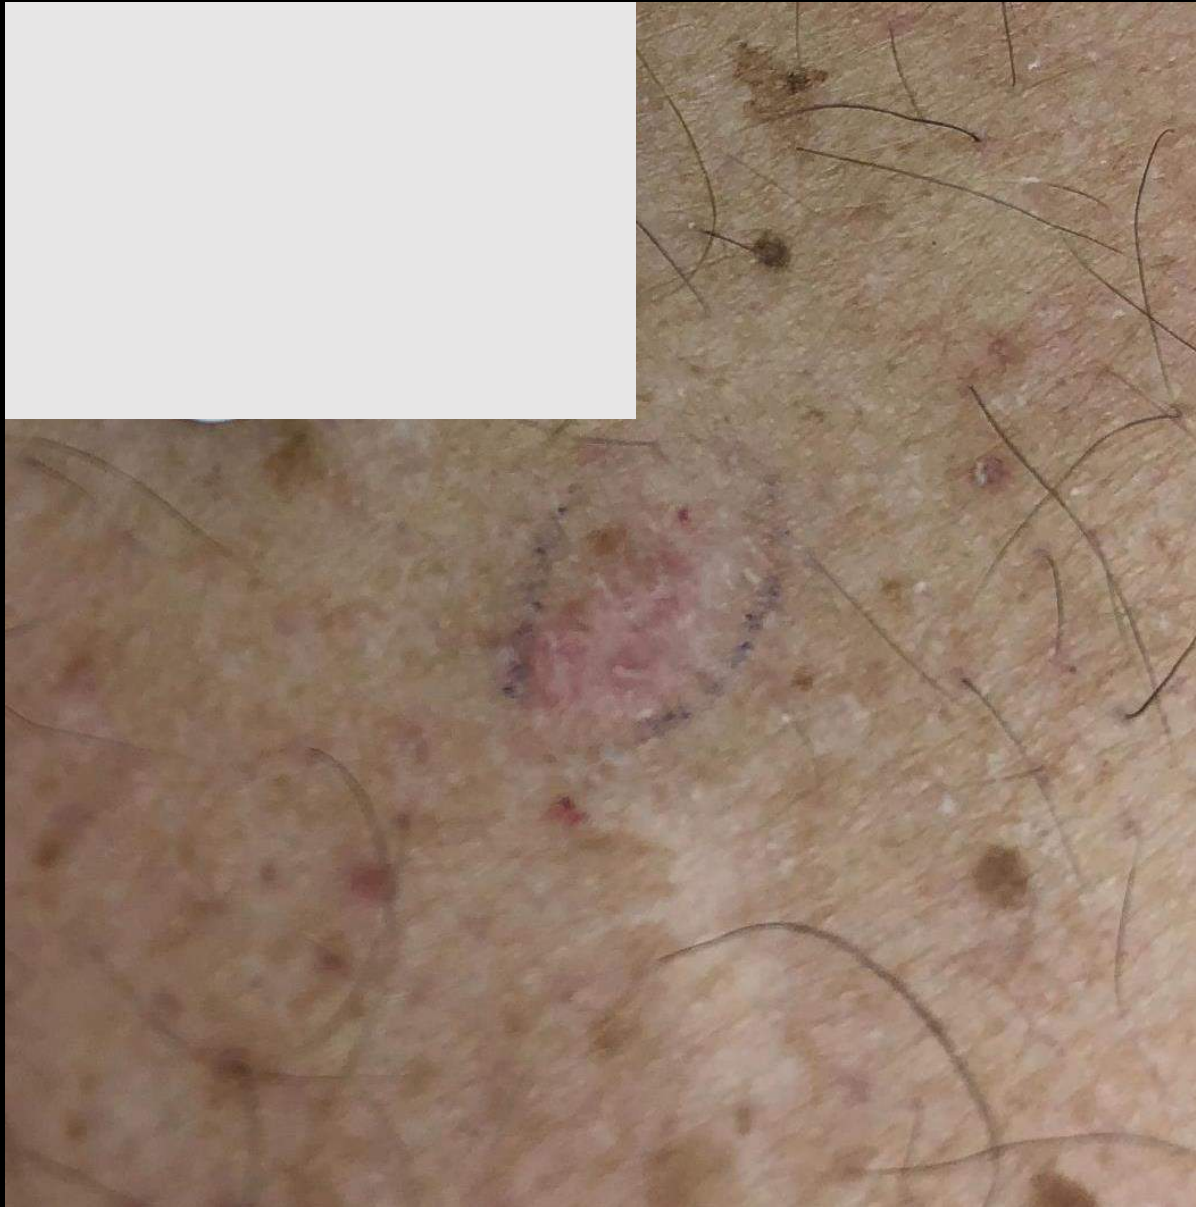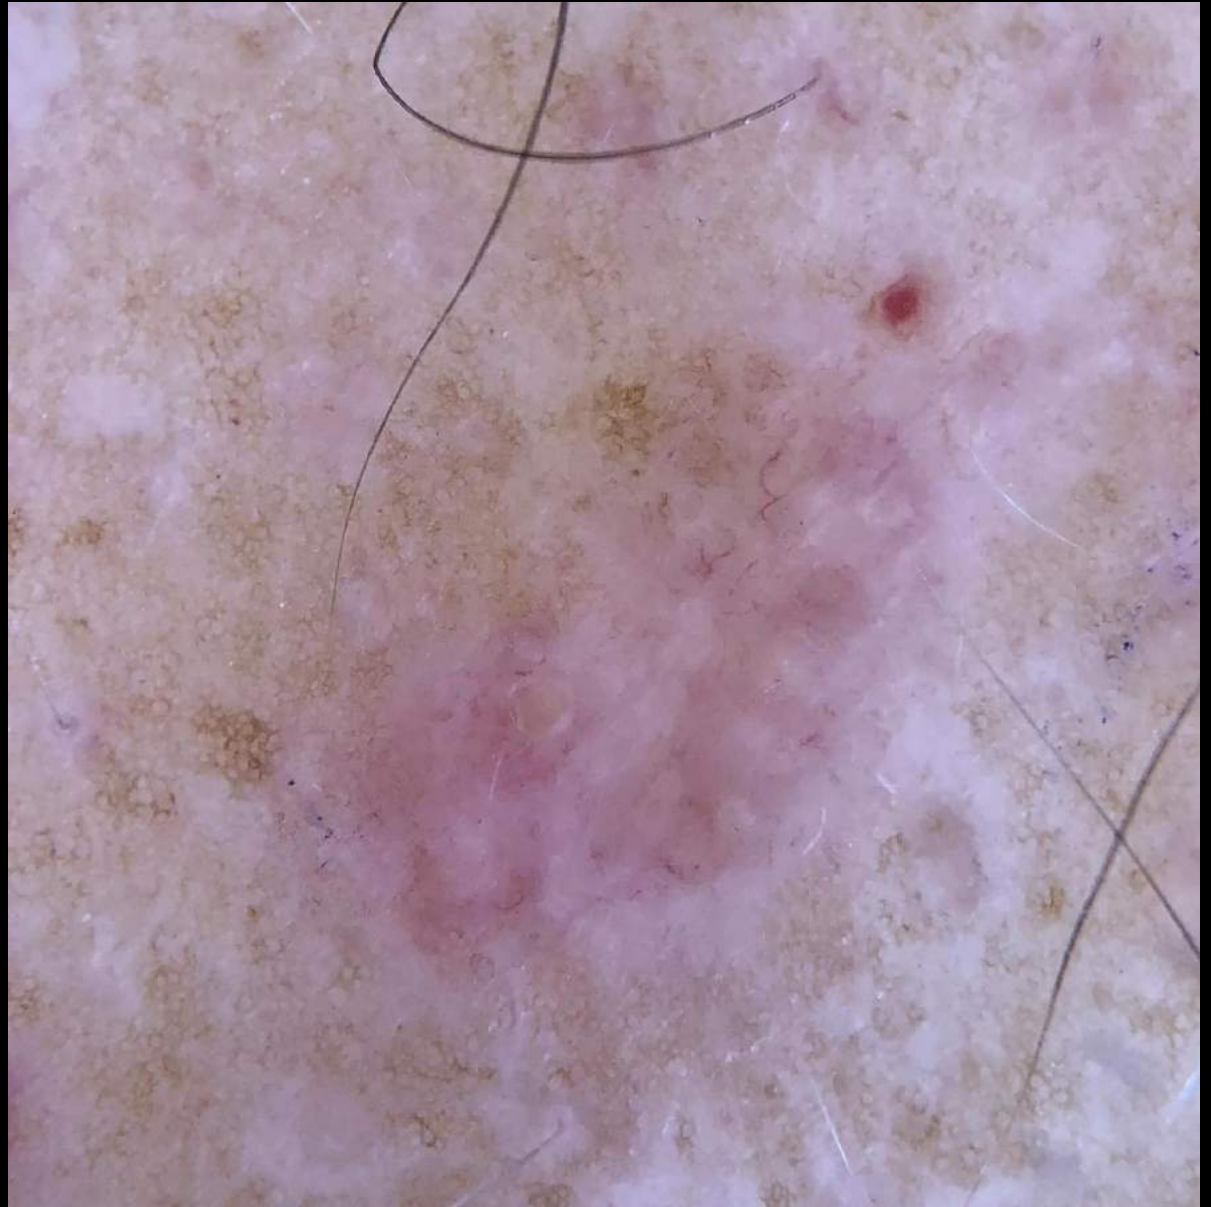

Case number 19



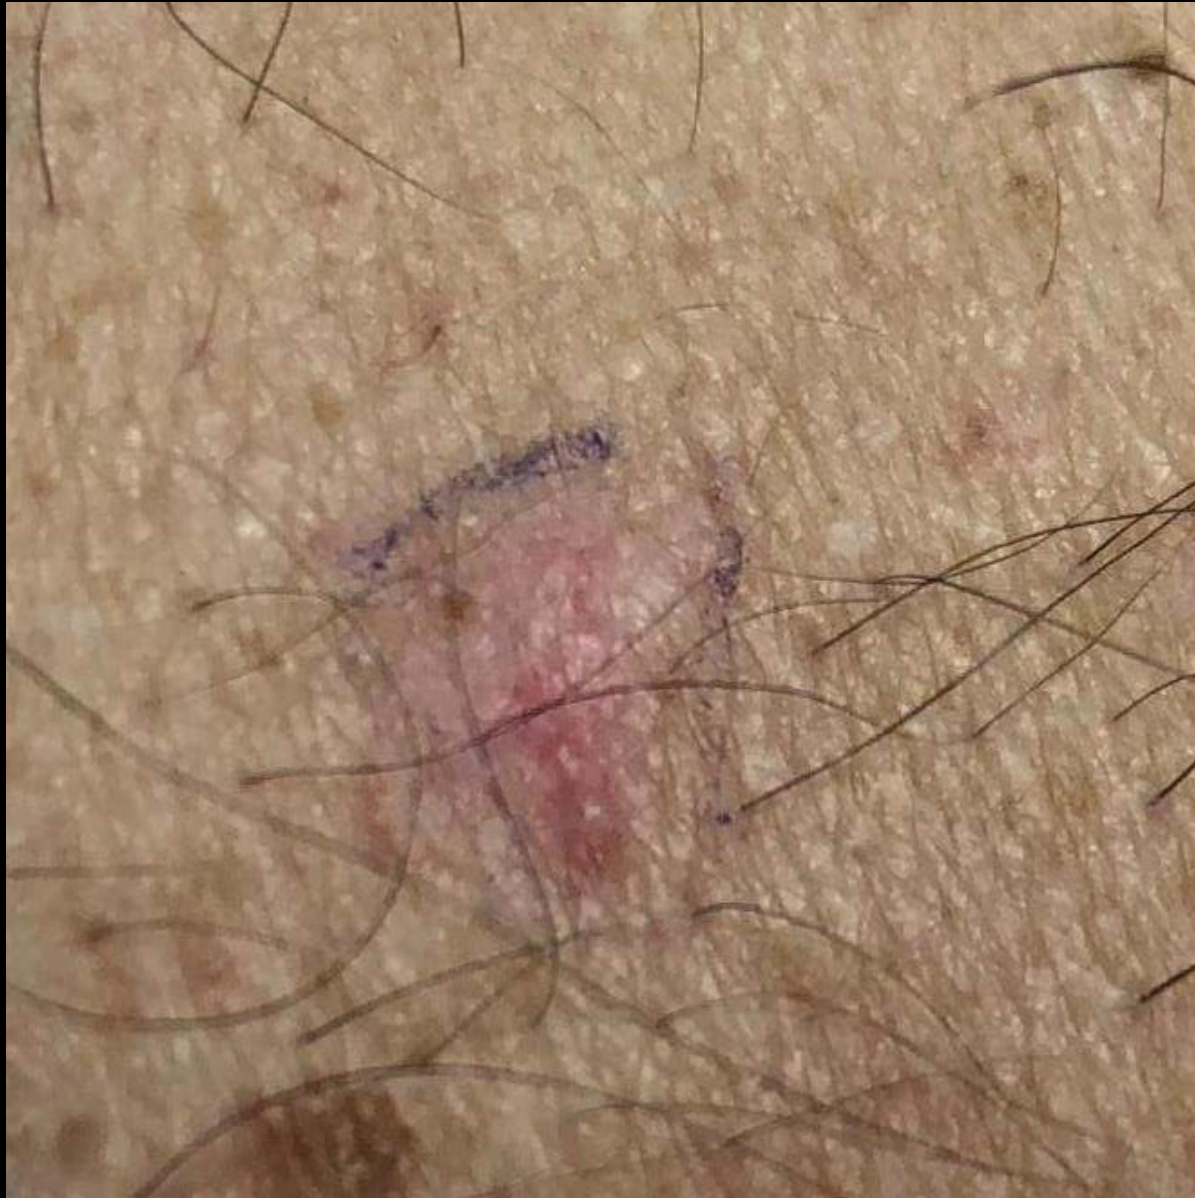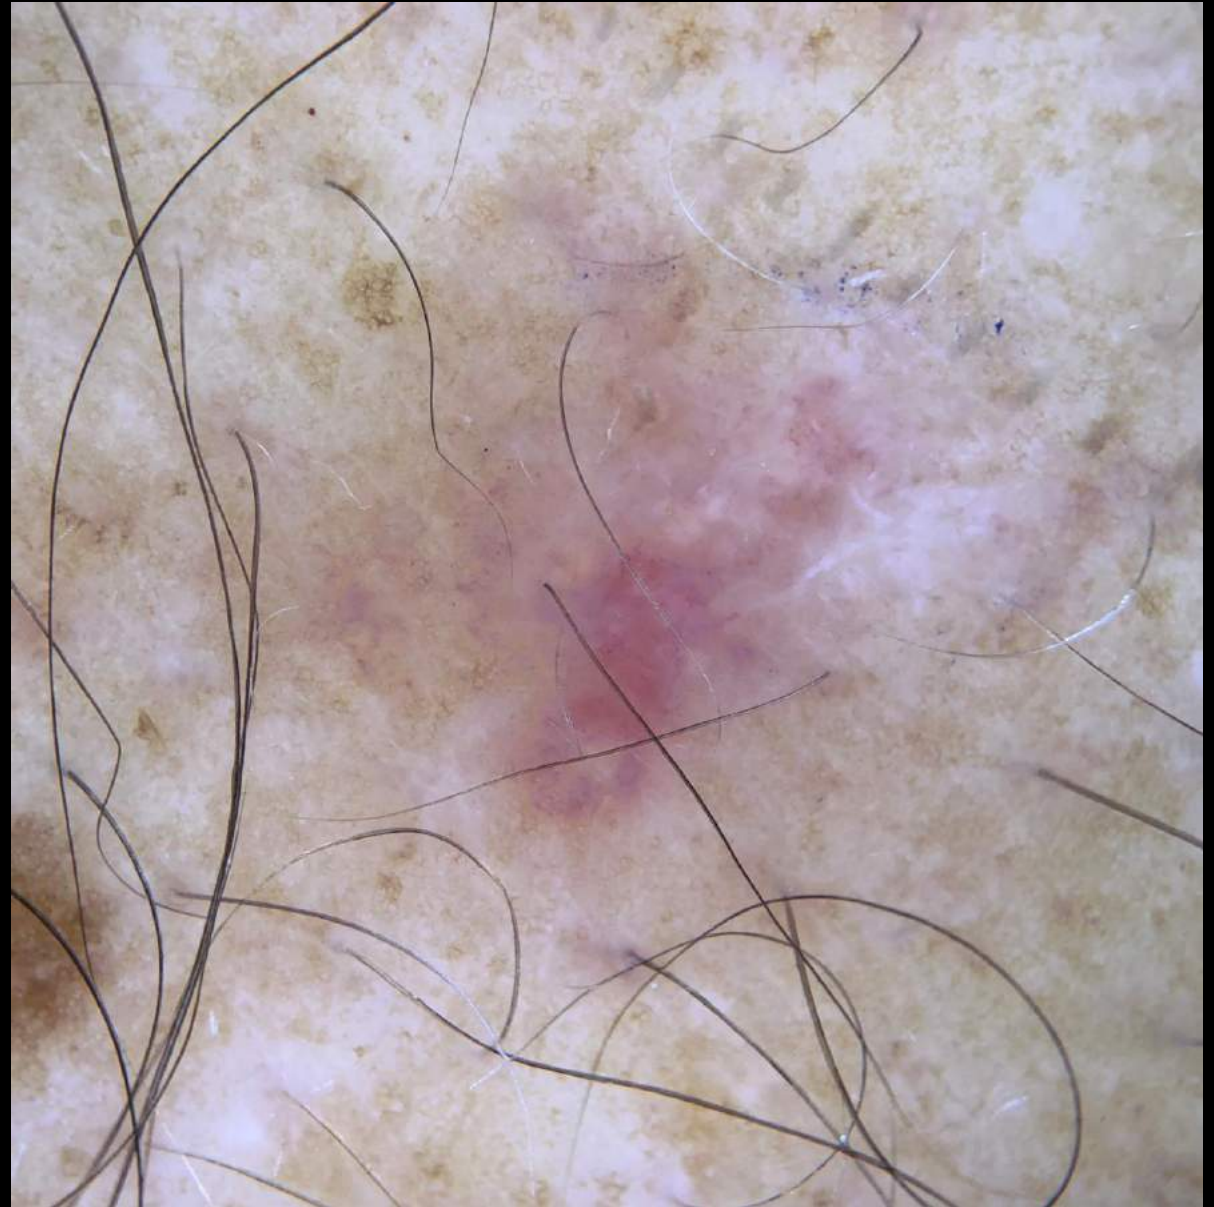

Case number 20



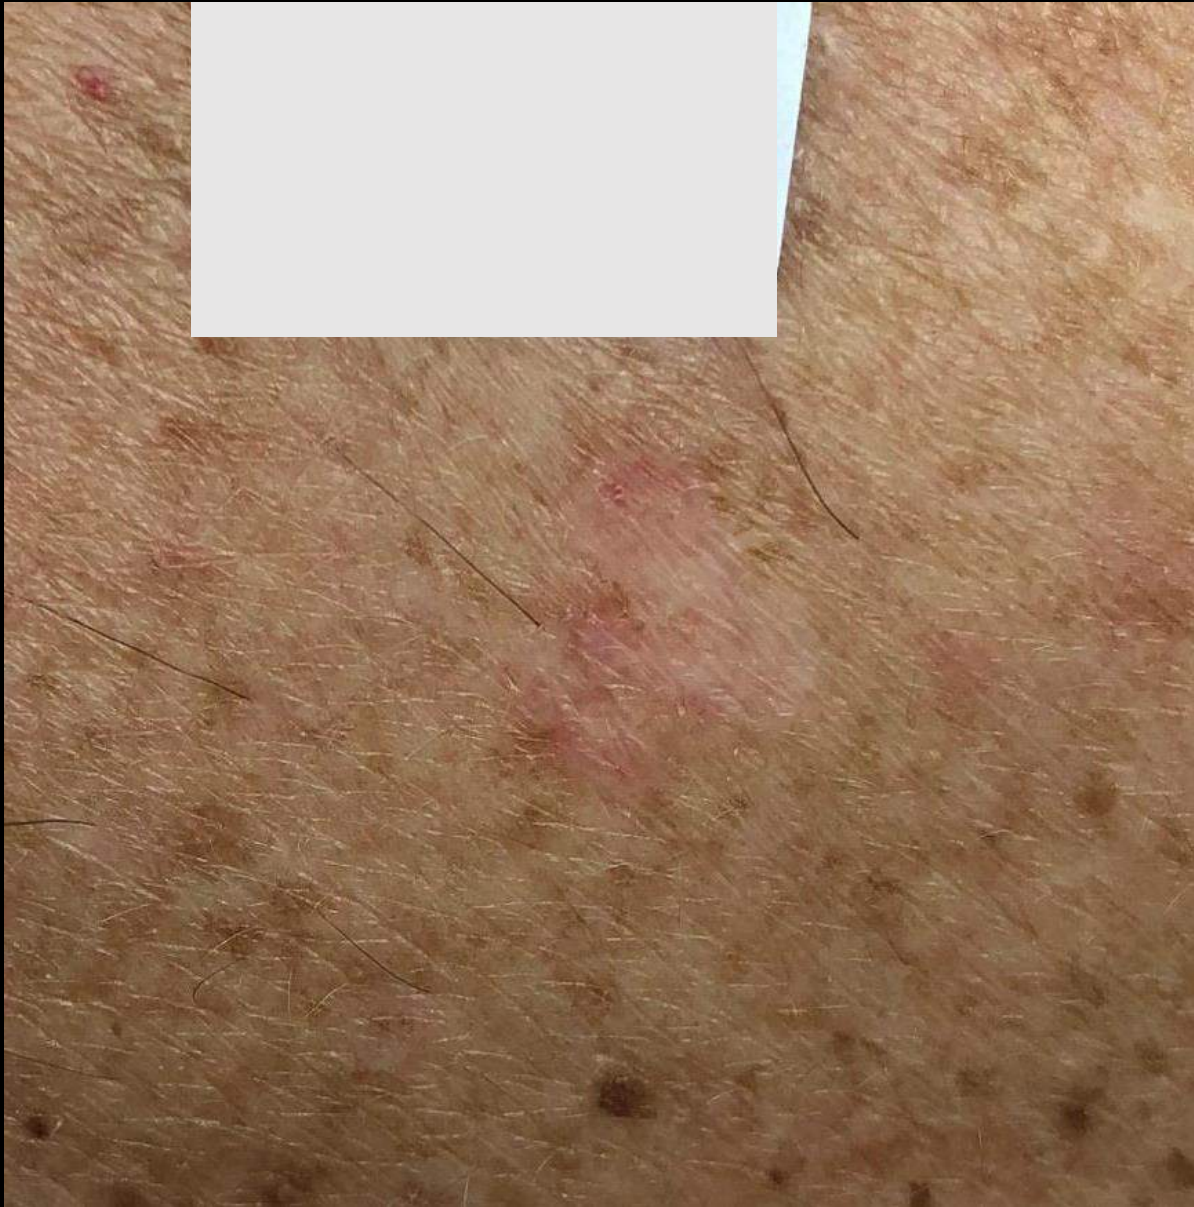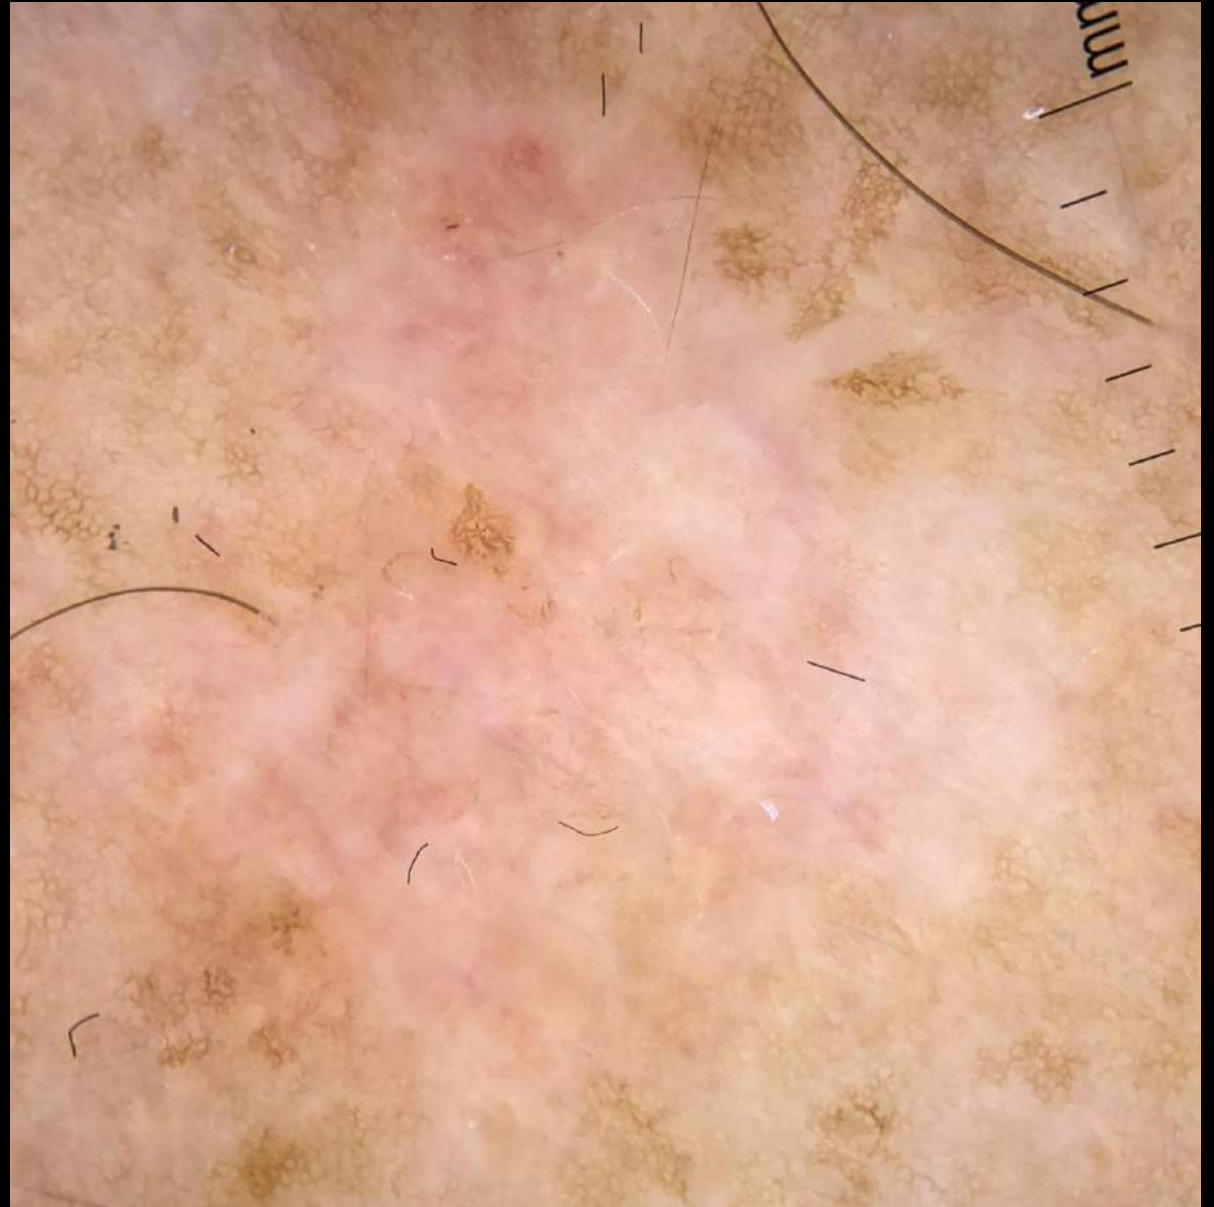

Case number 21



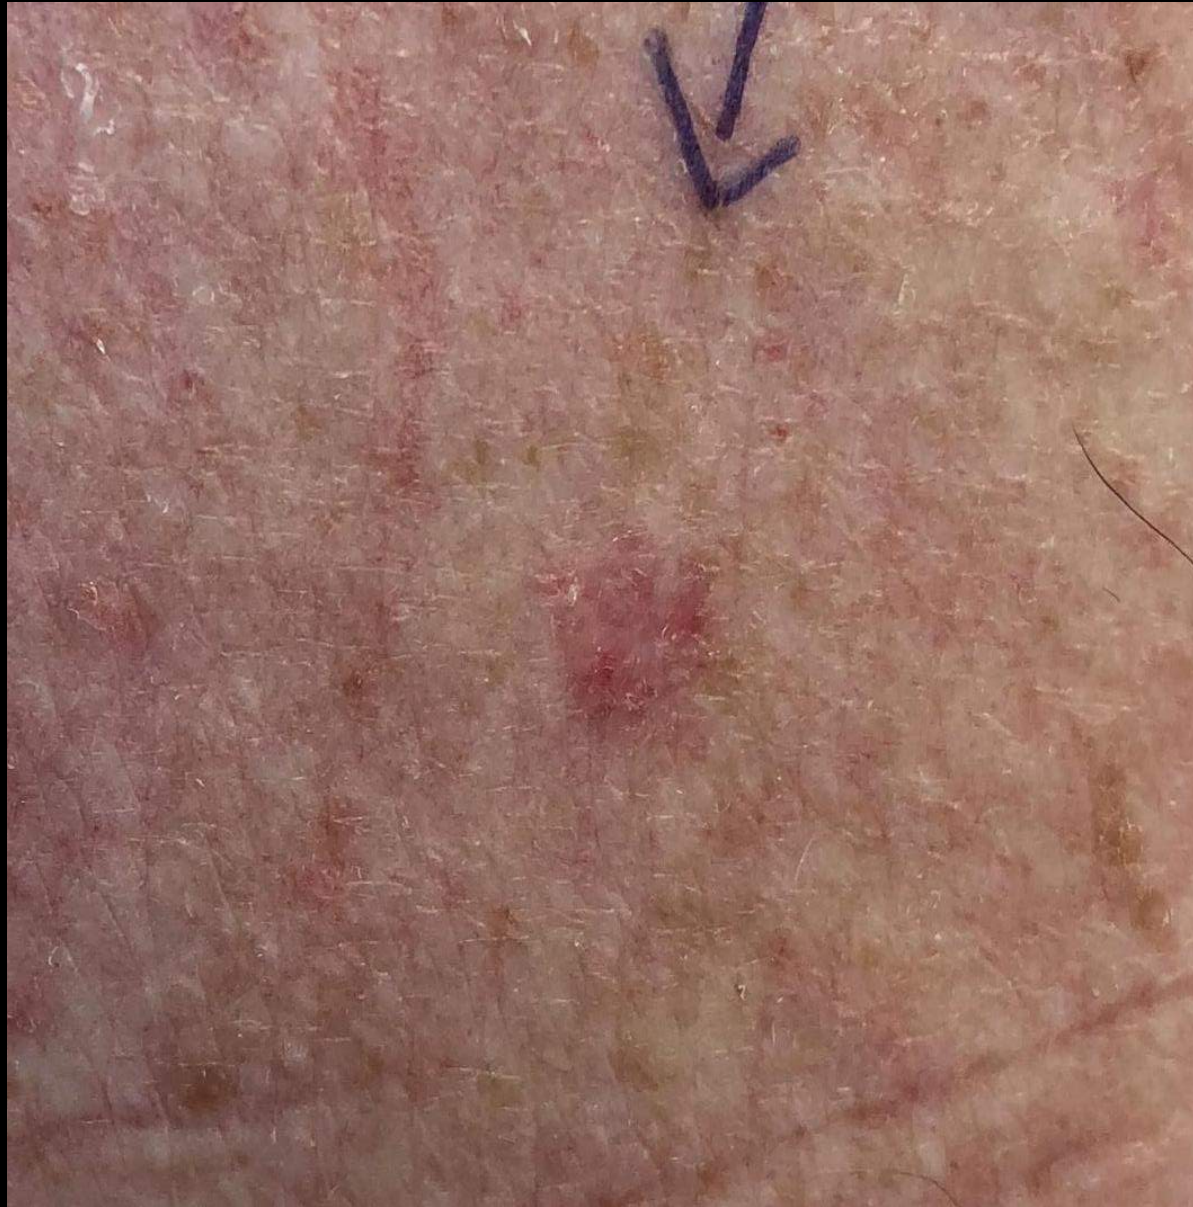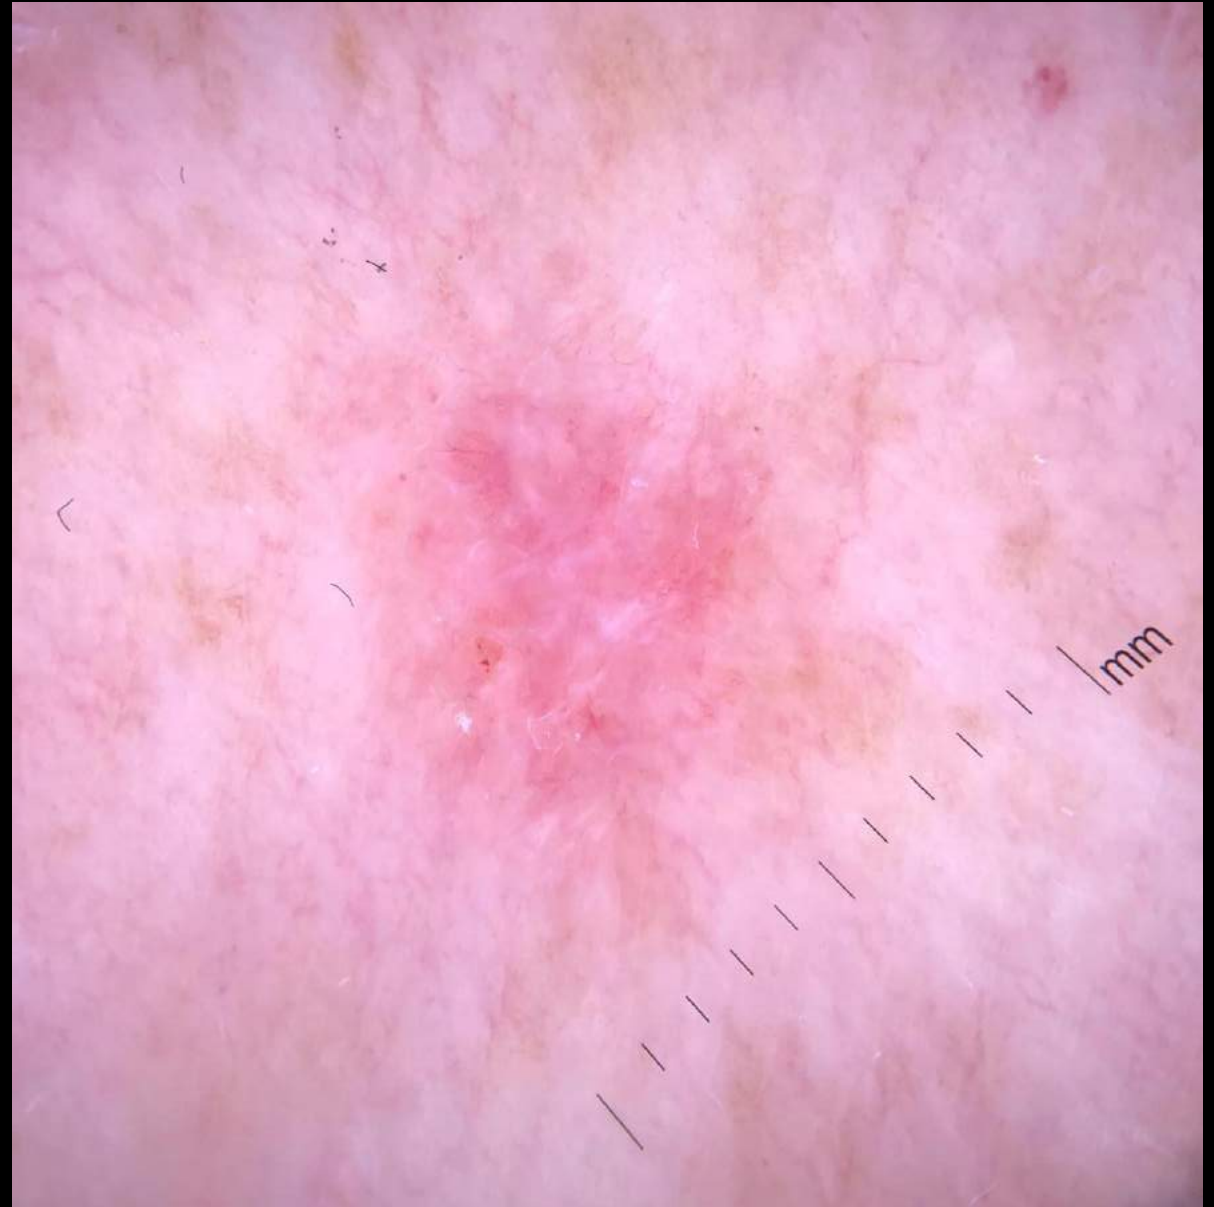

Case number 22



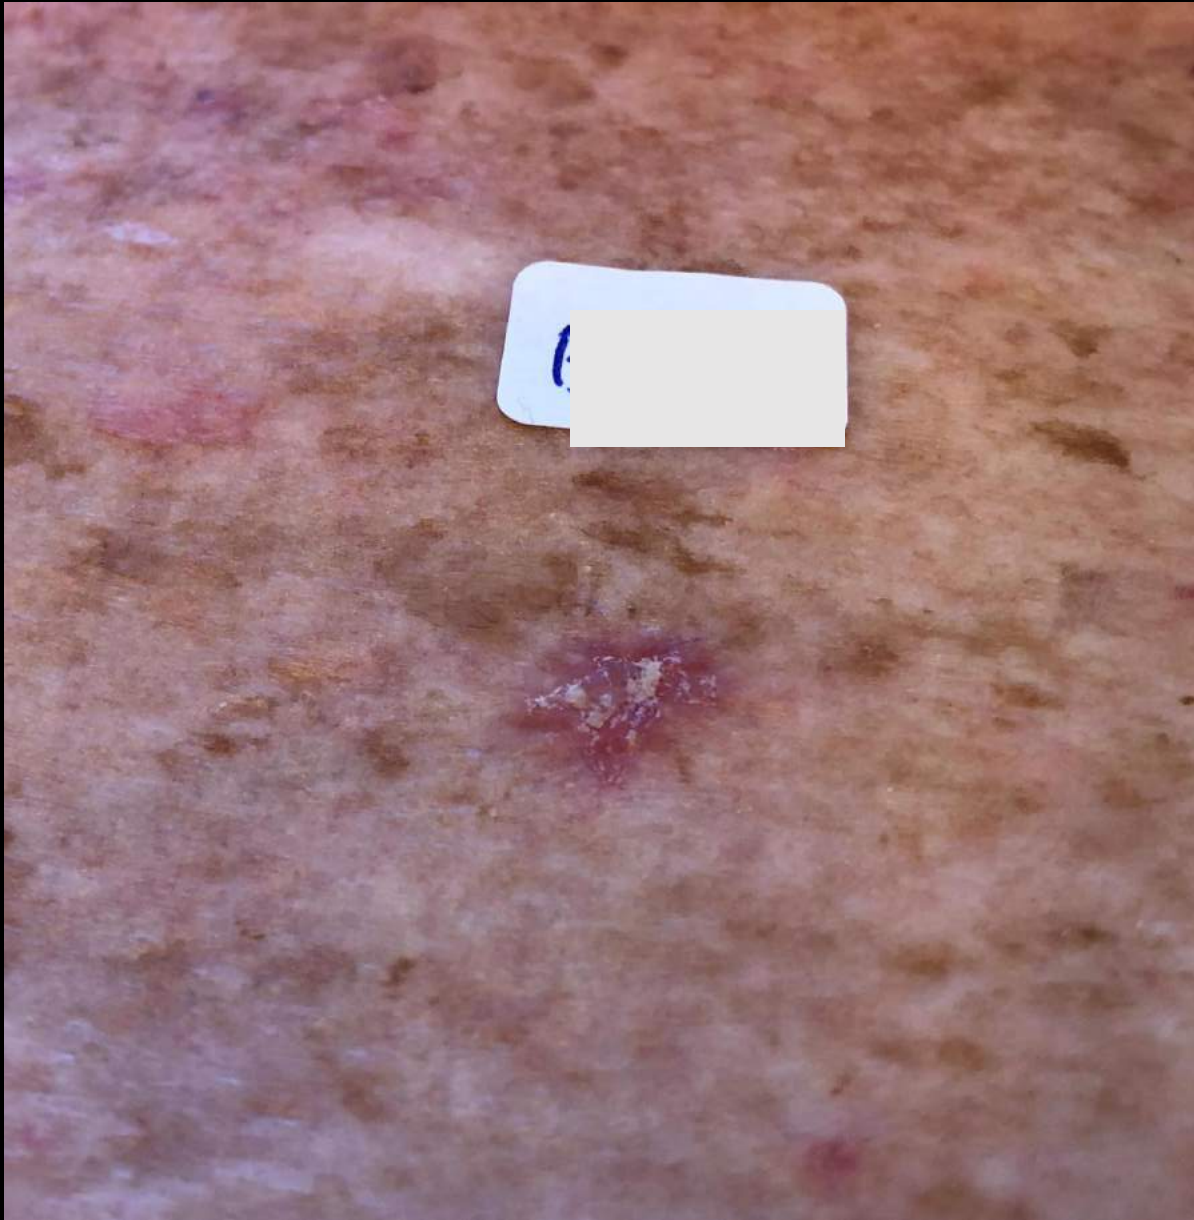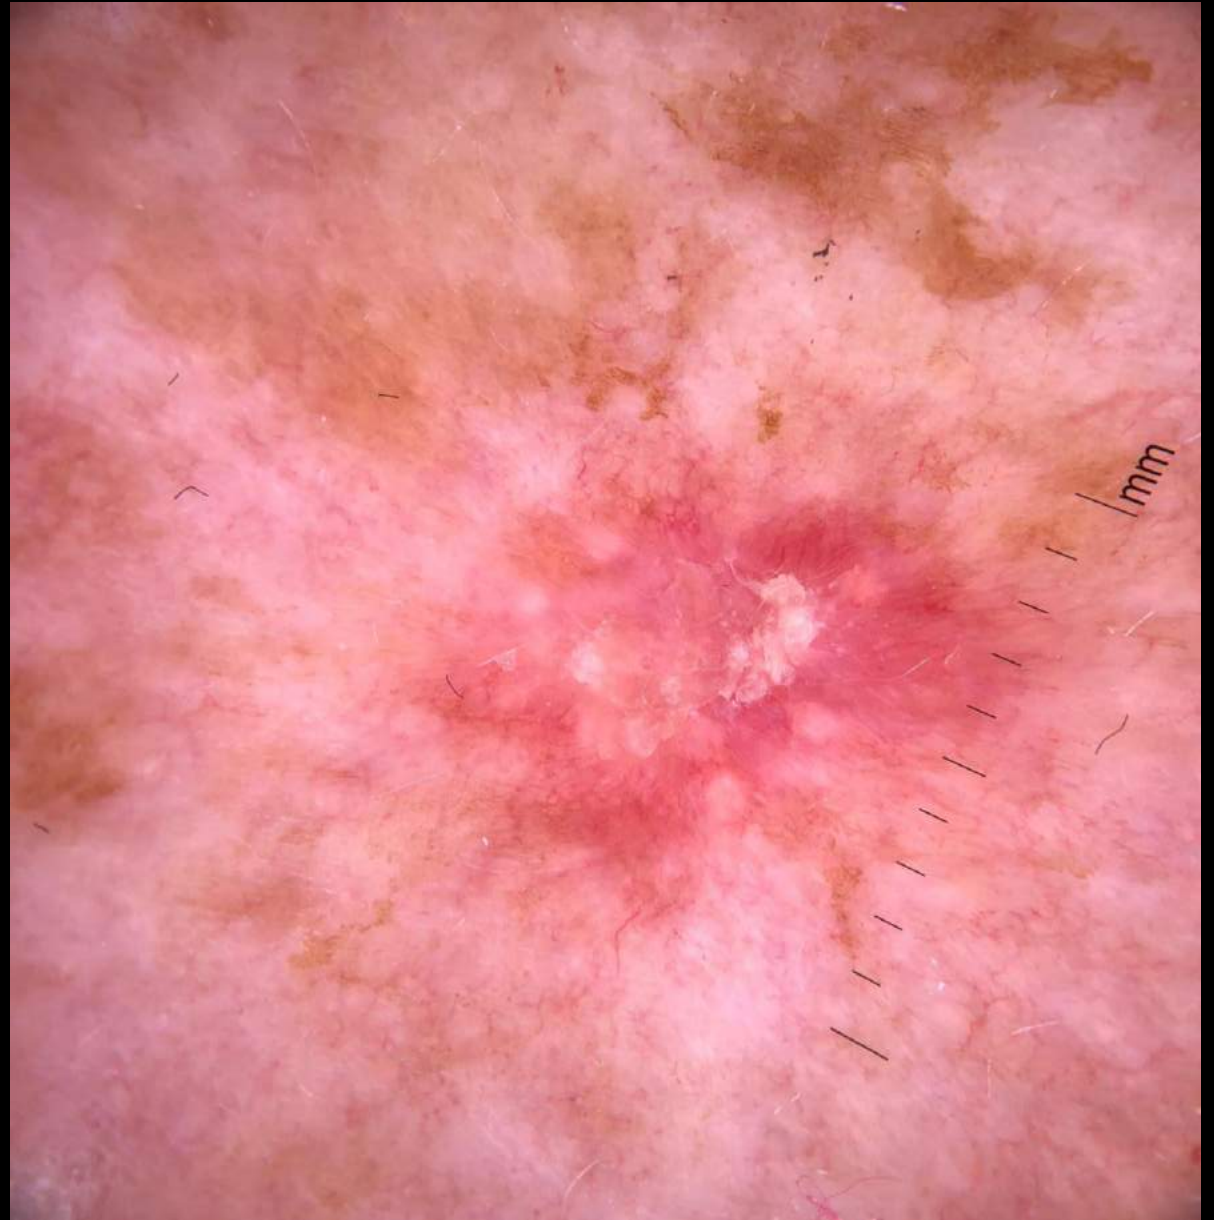

Case number 23



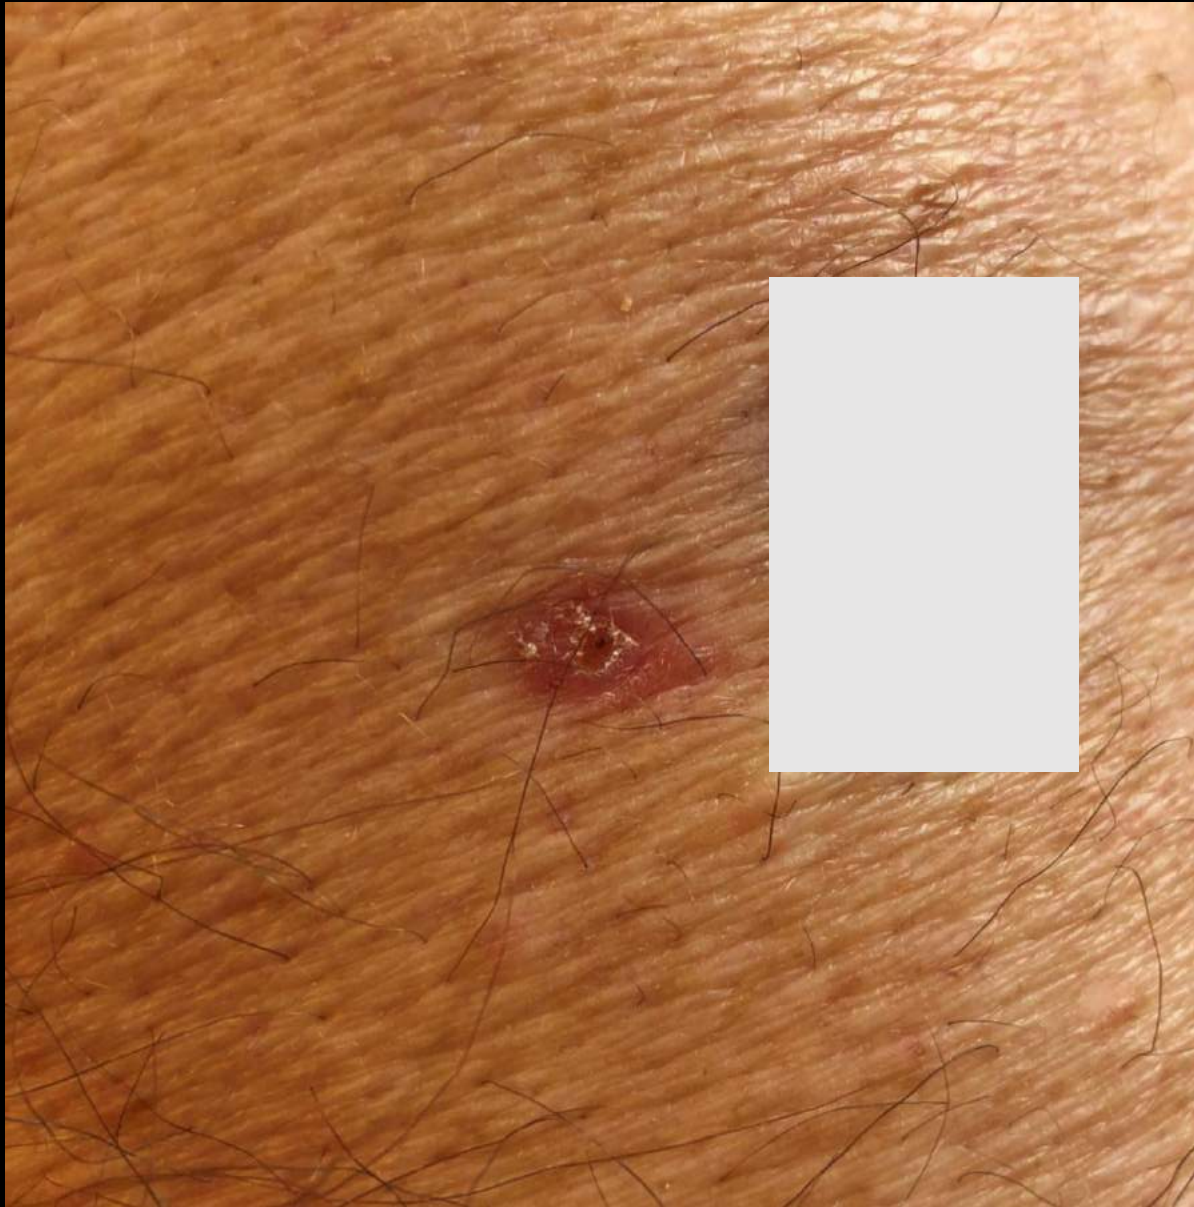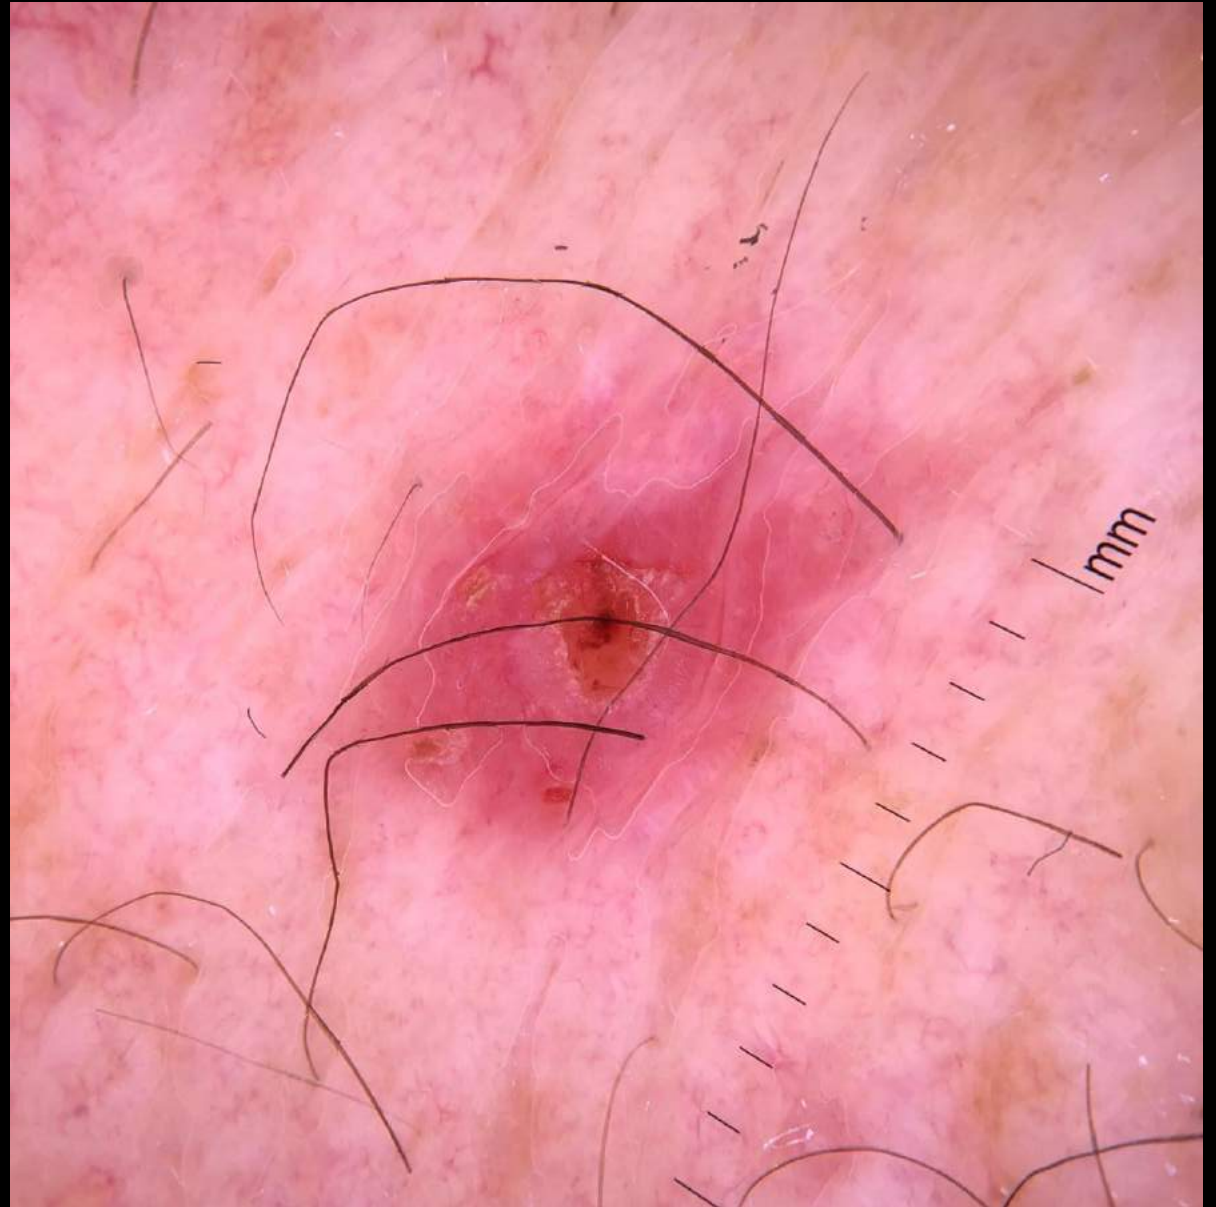

Case number 24



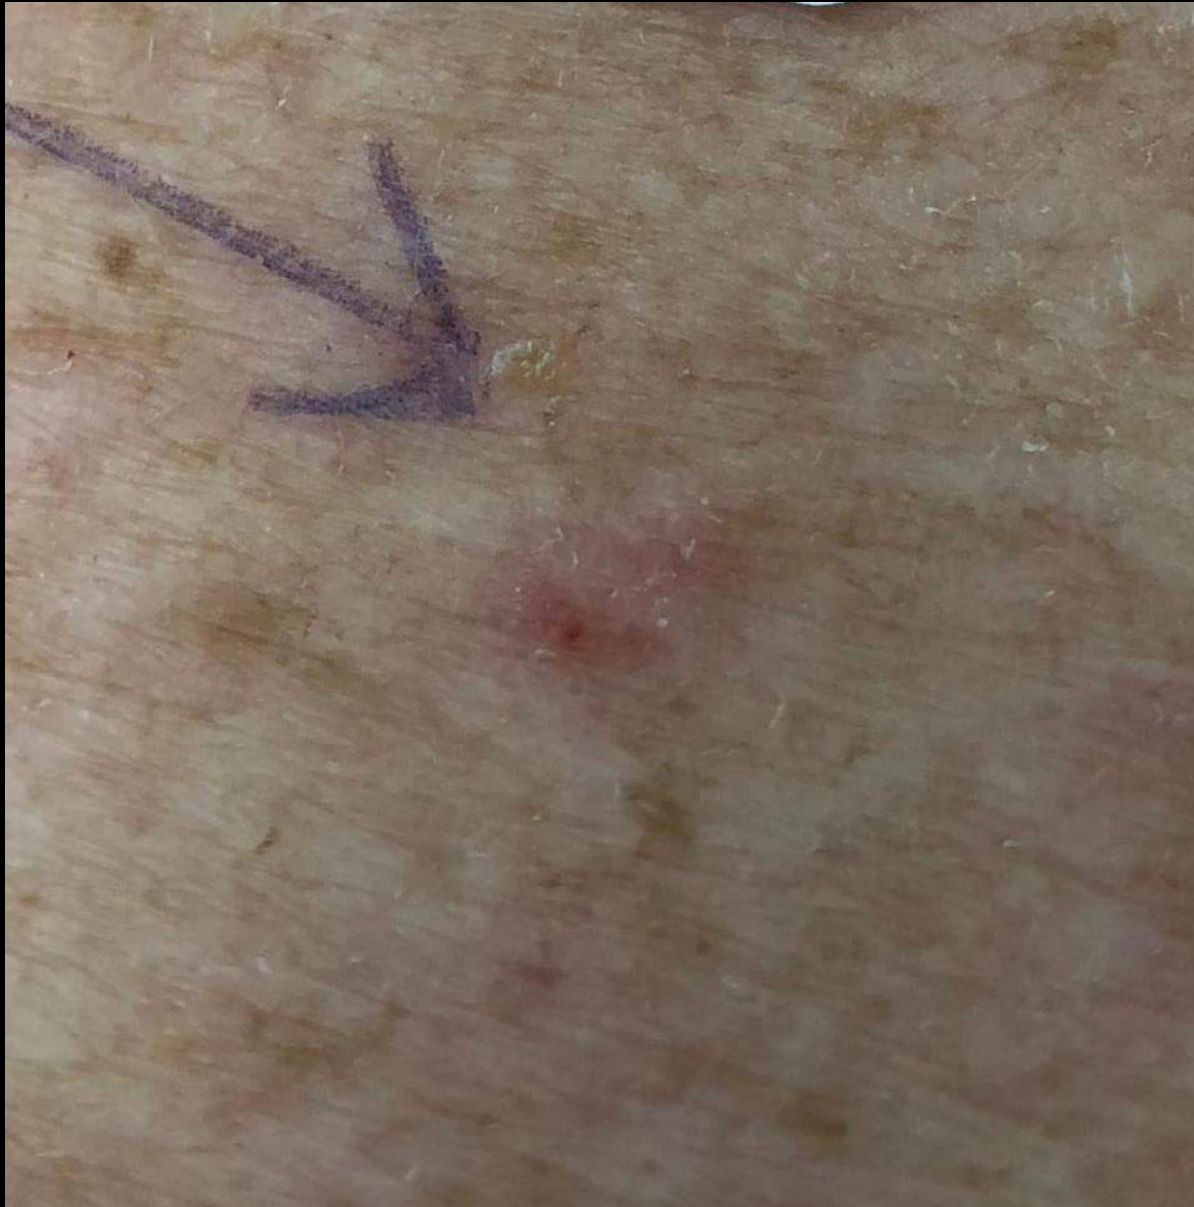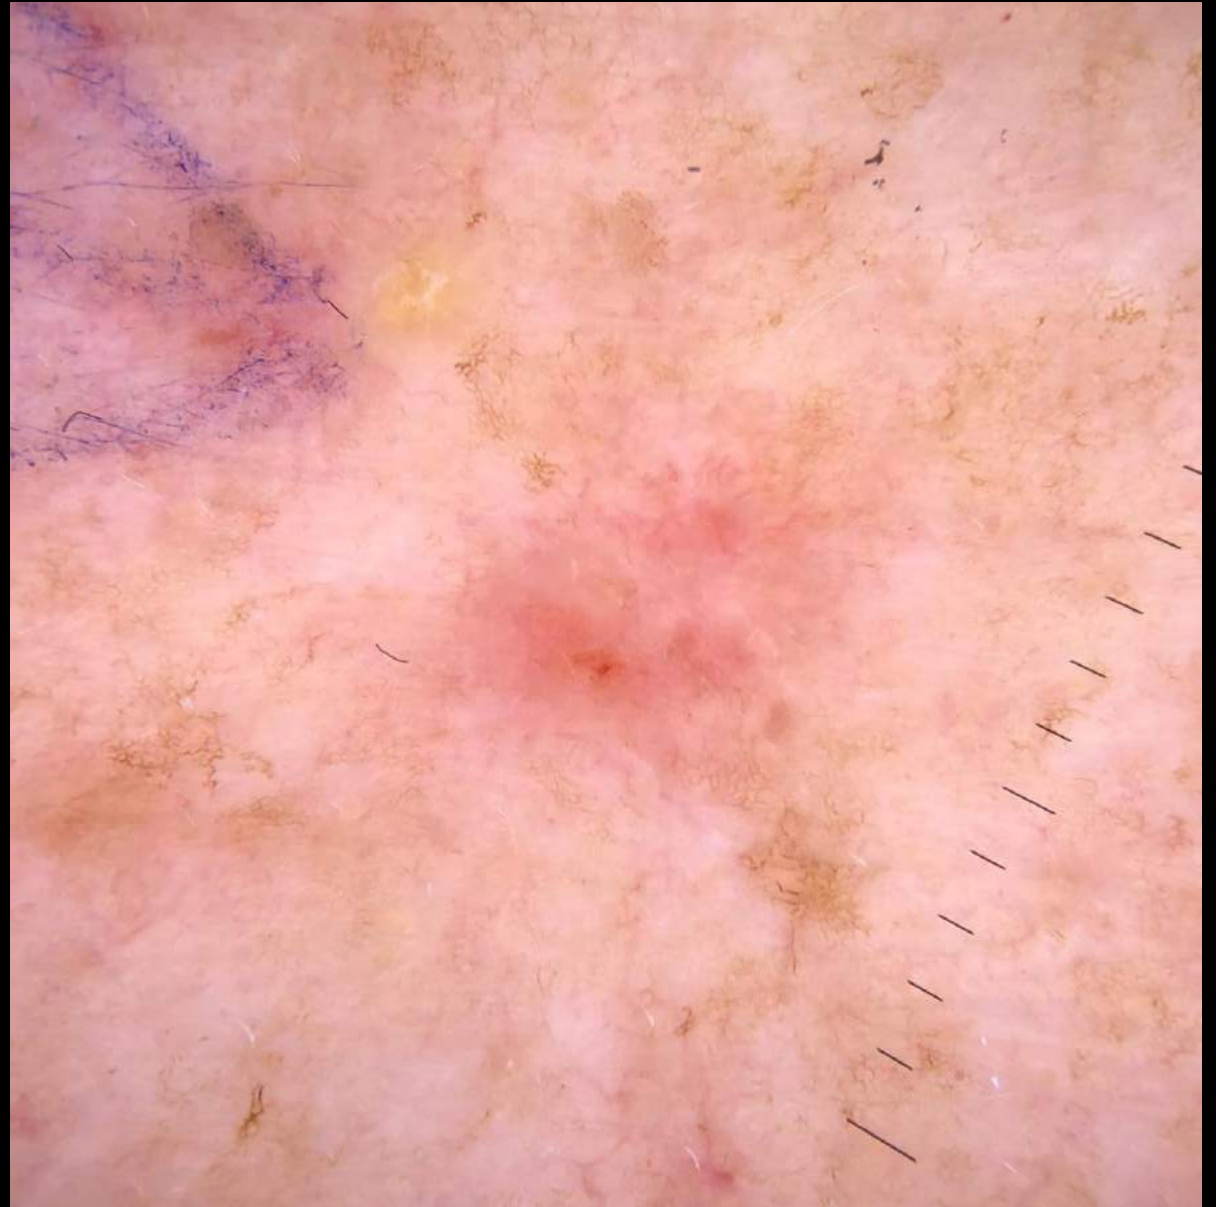

Case number 25



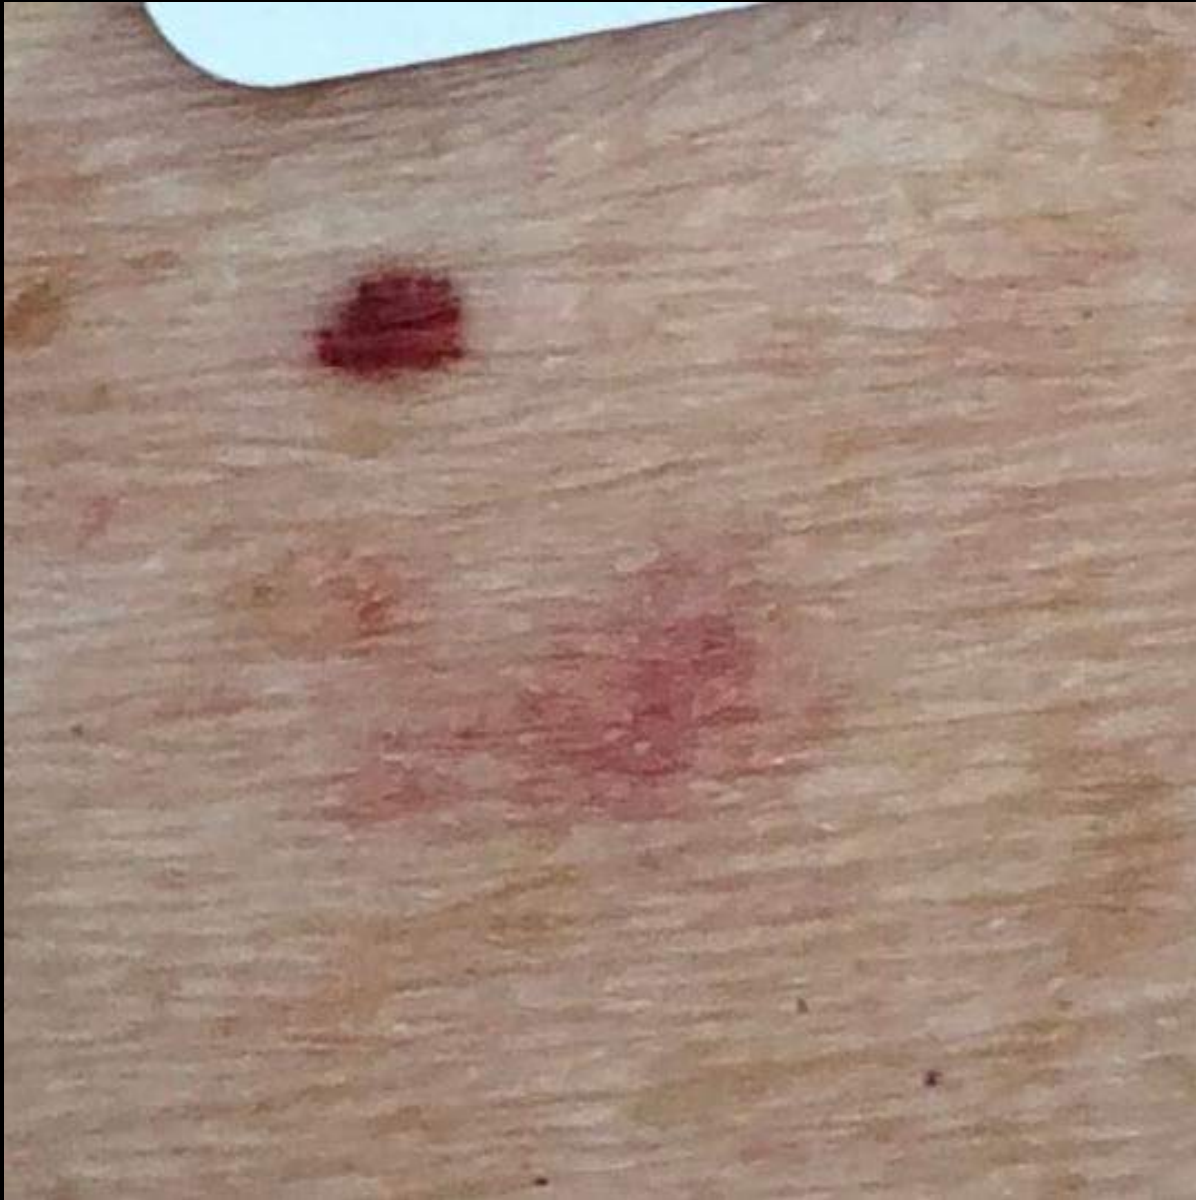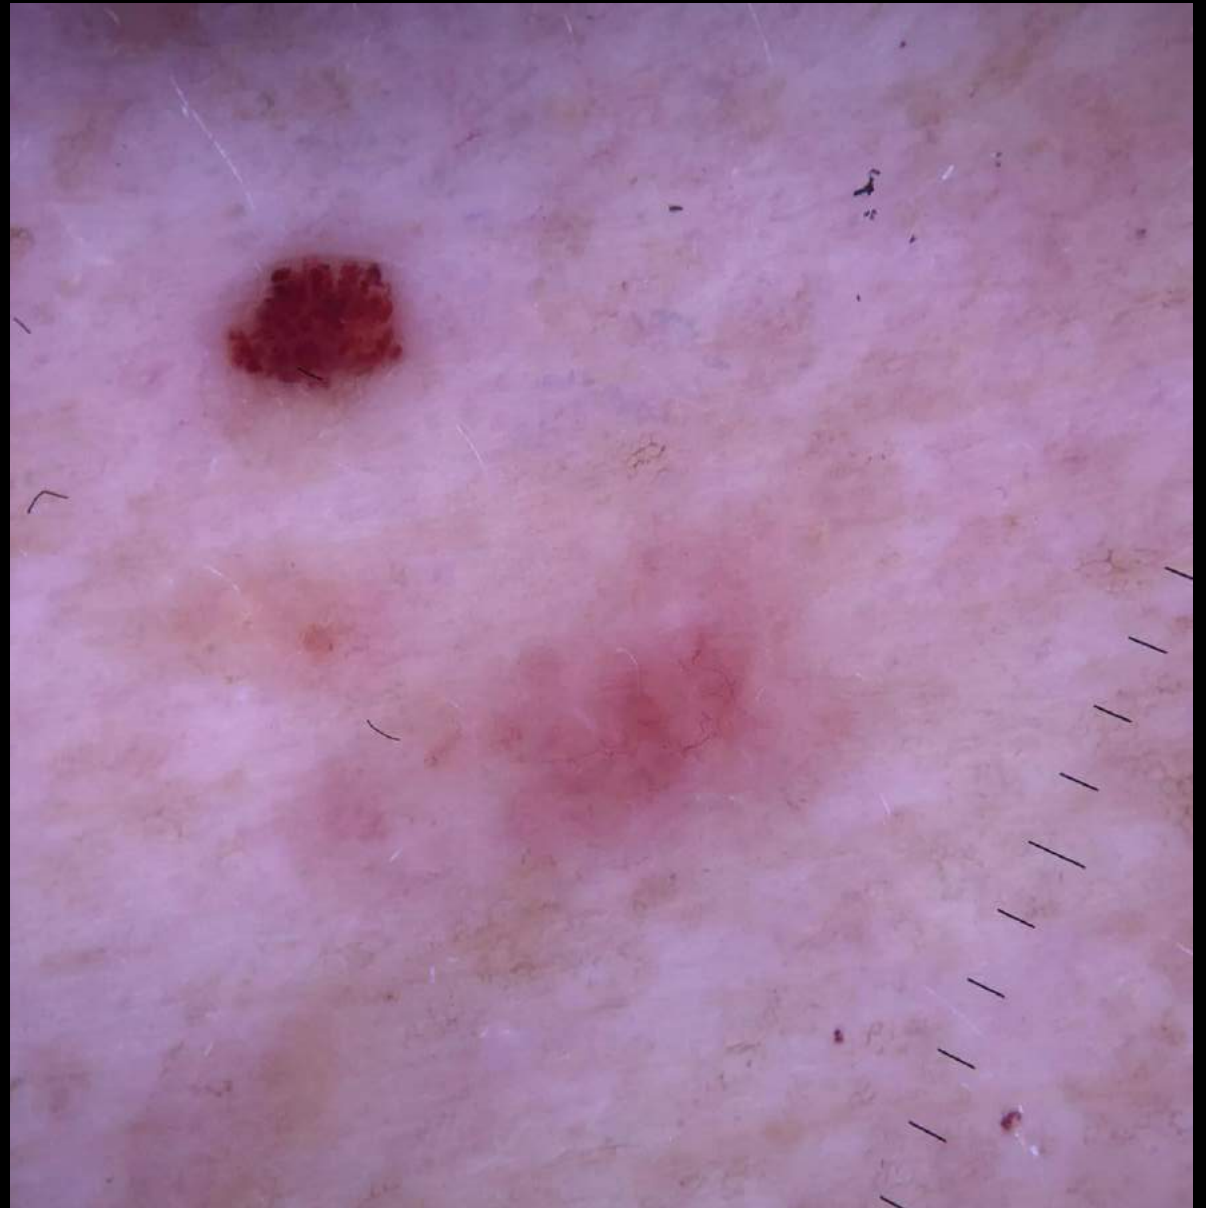

Case number 26

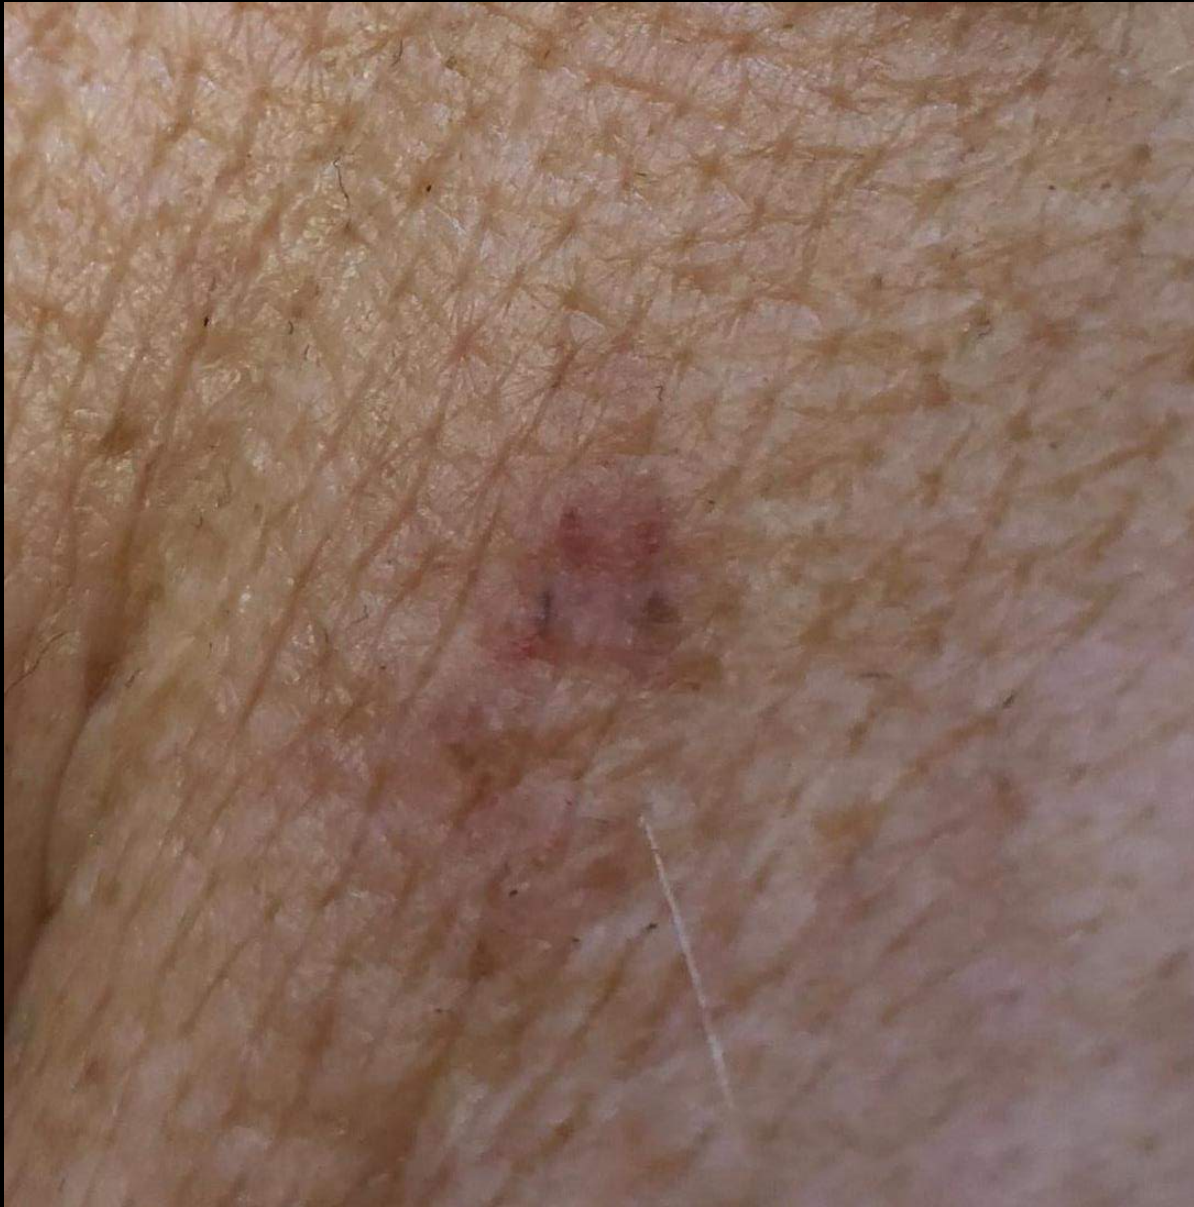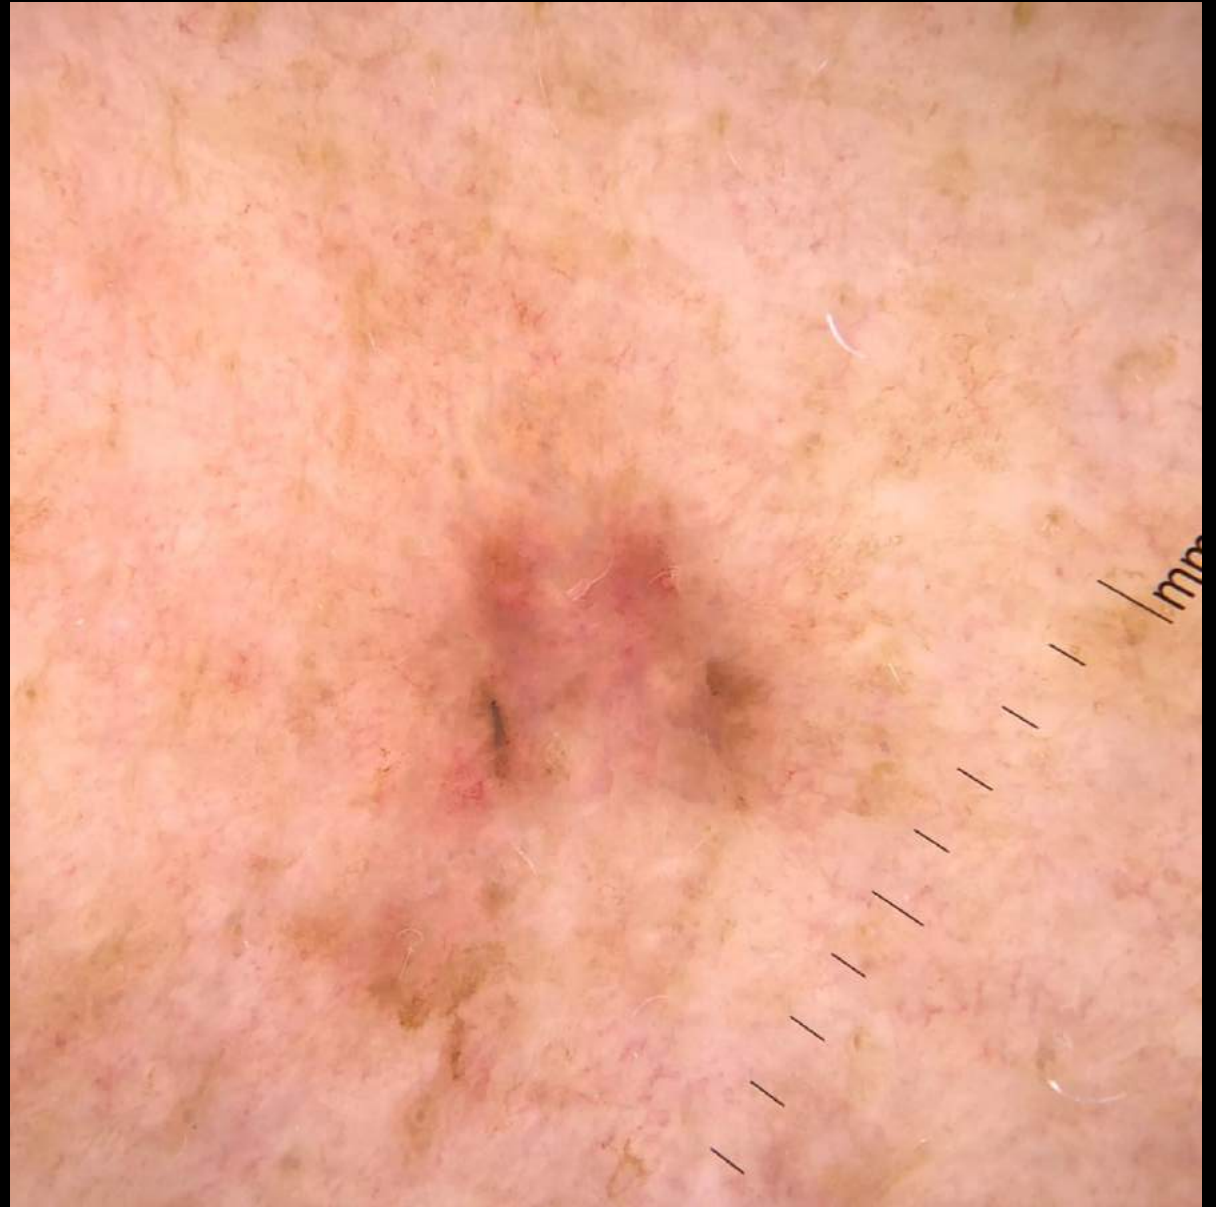

Case number 27



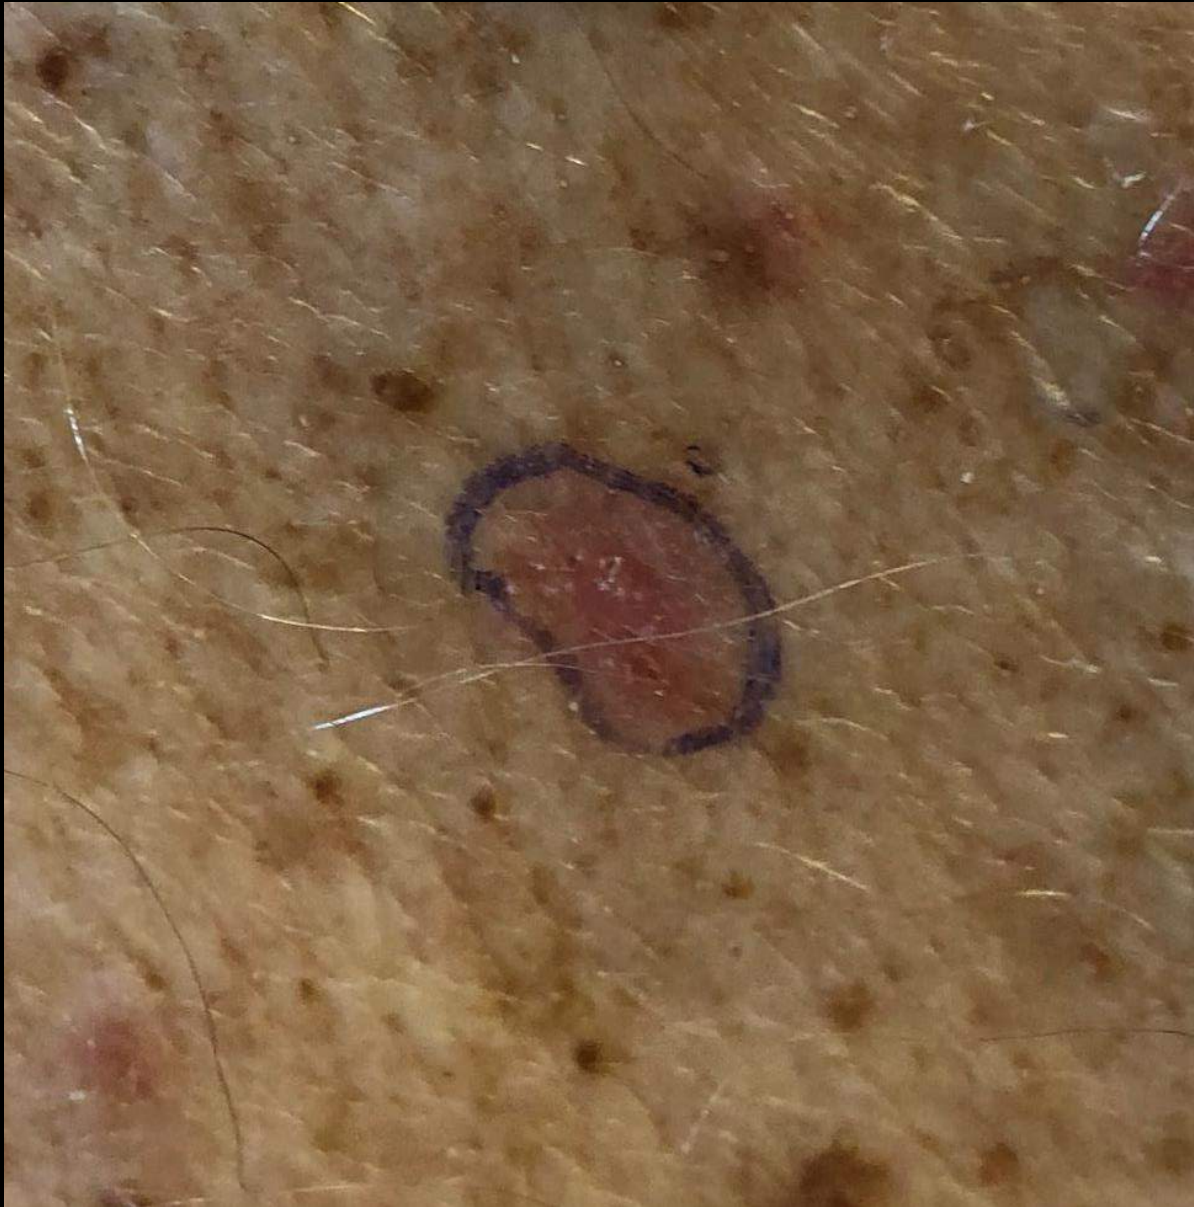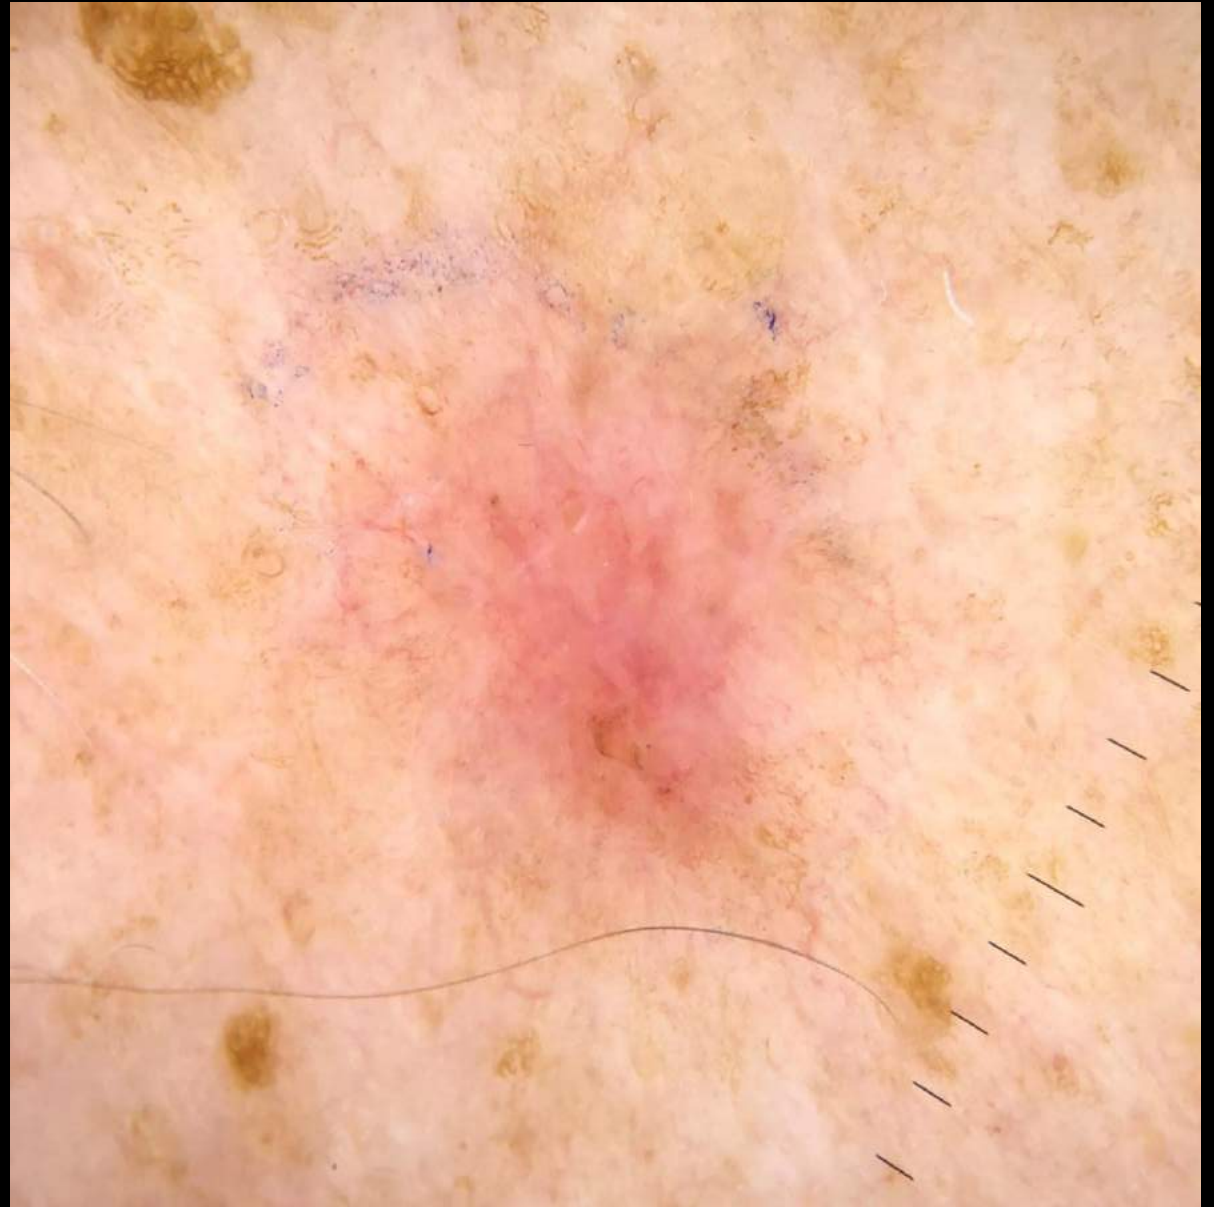

Case number 28

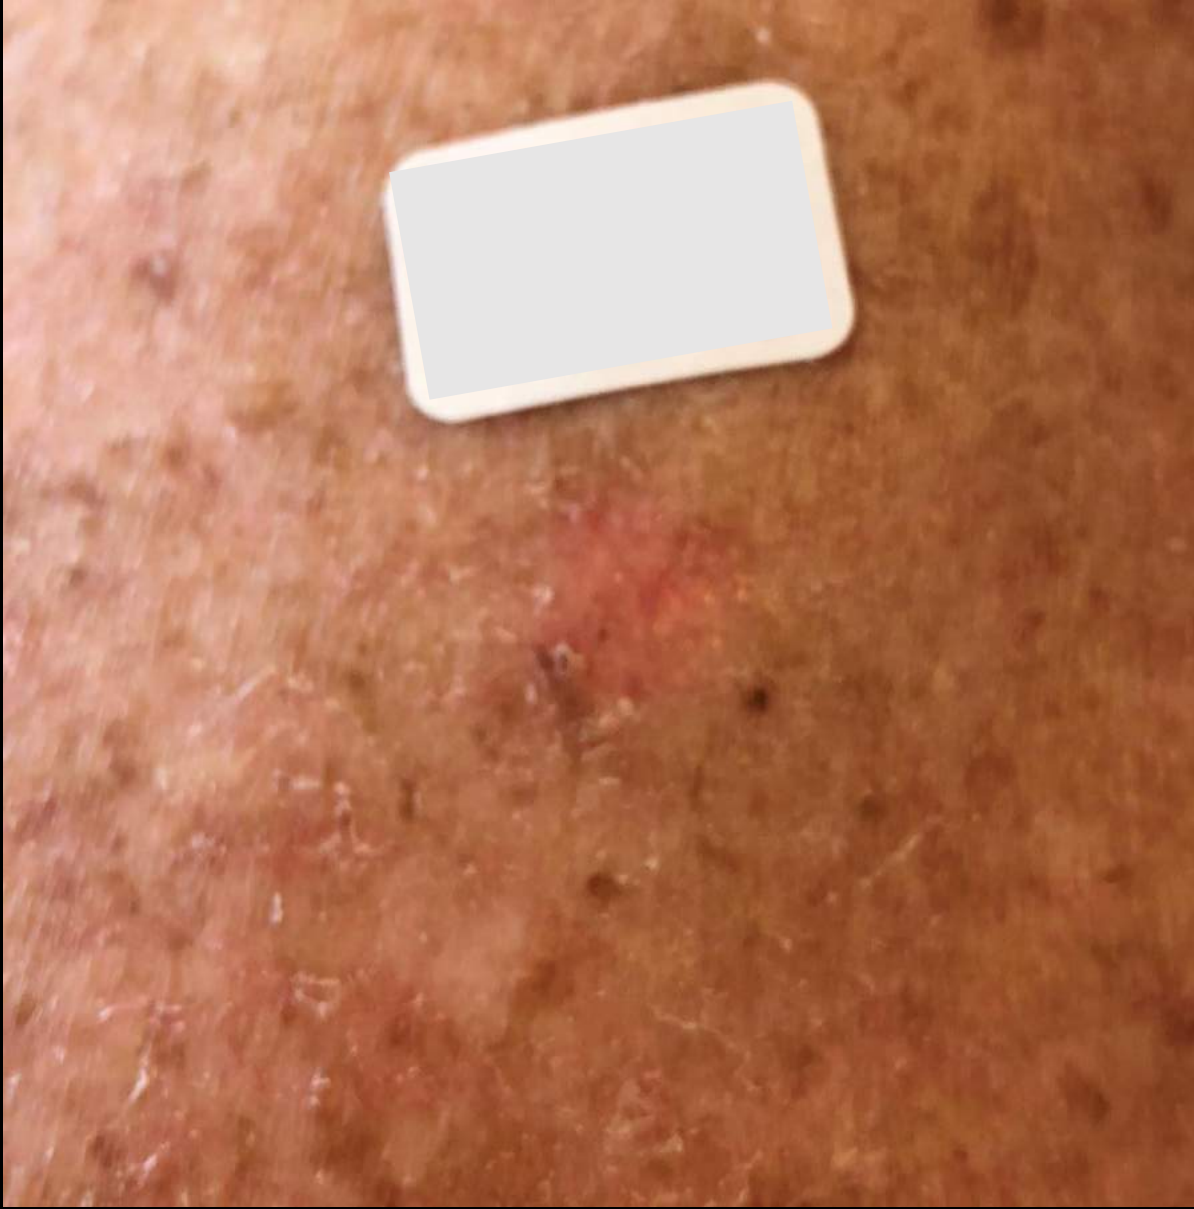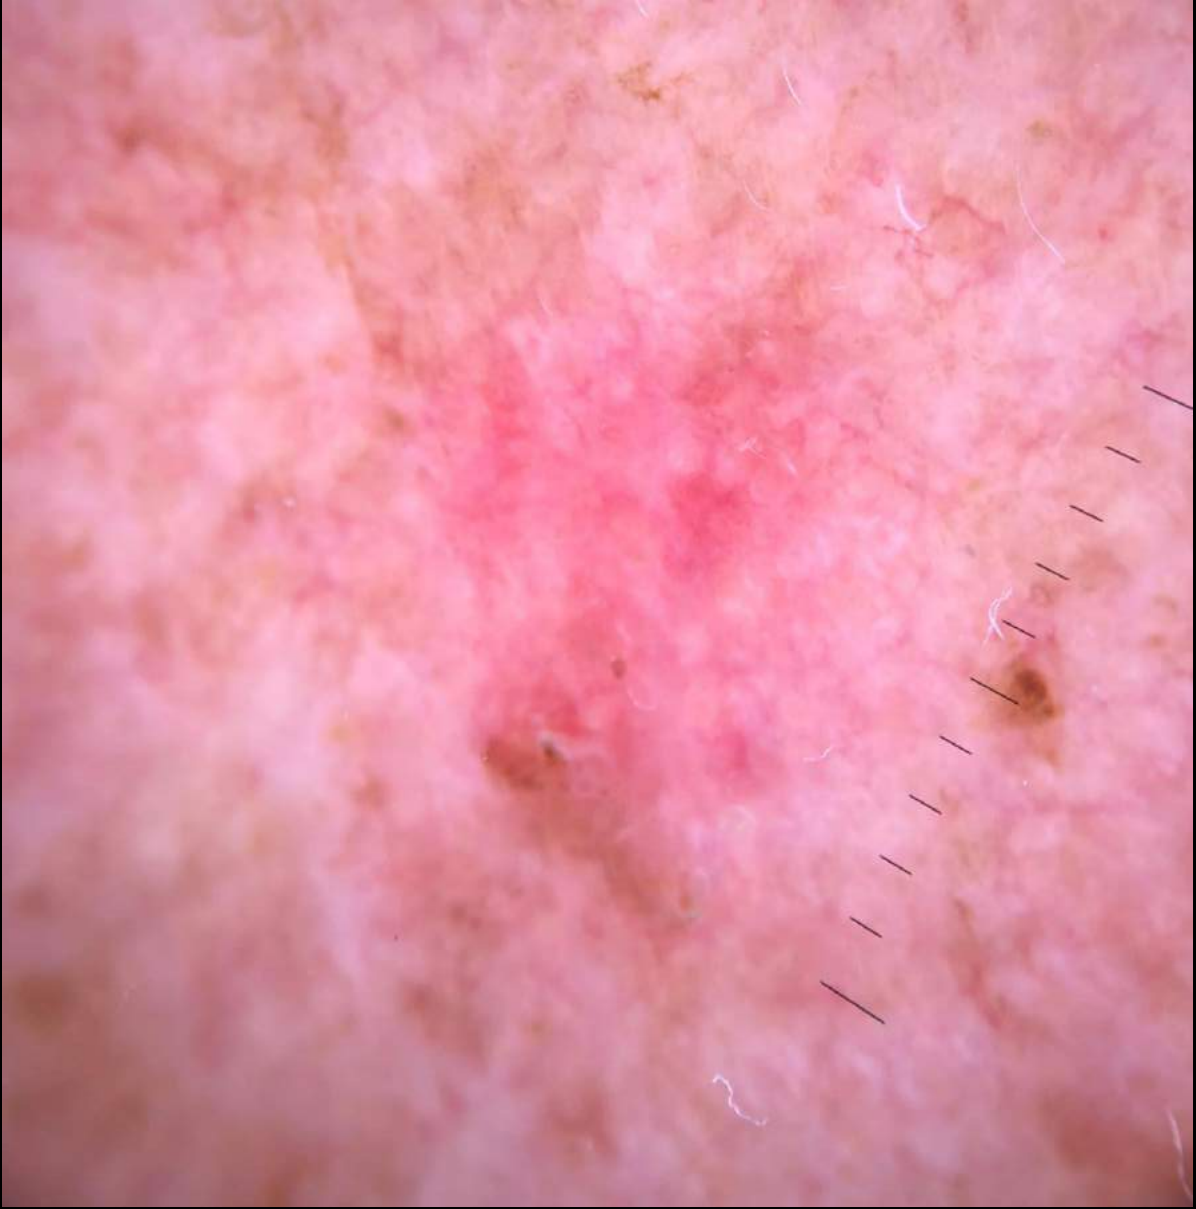

Case number 29



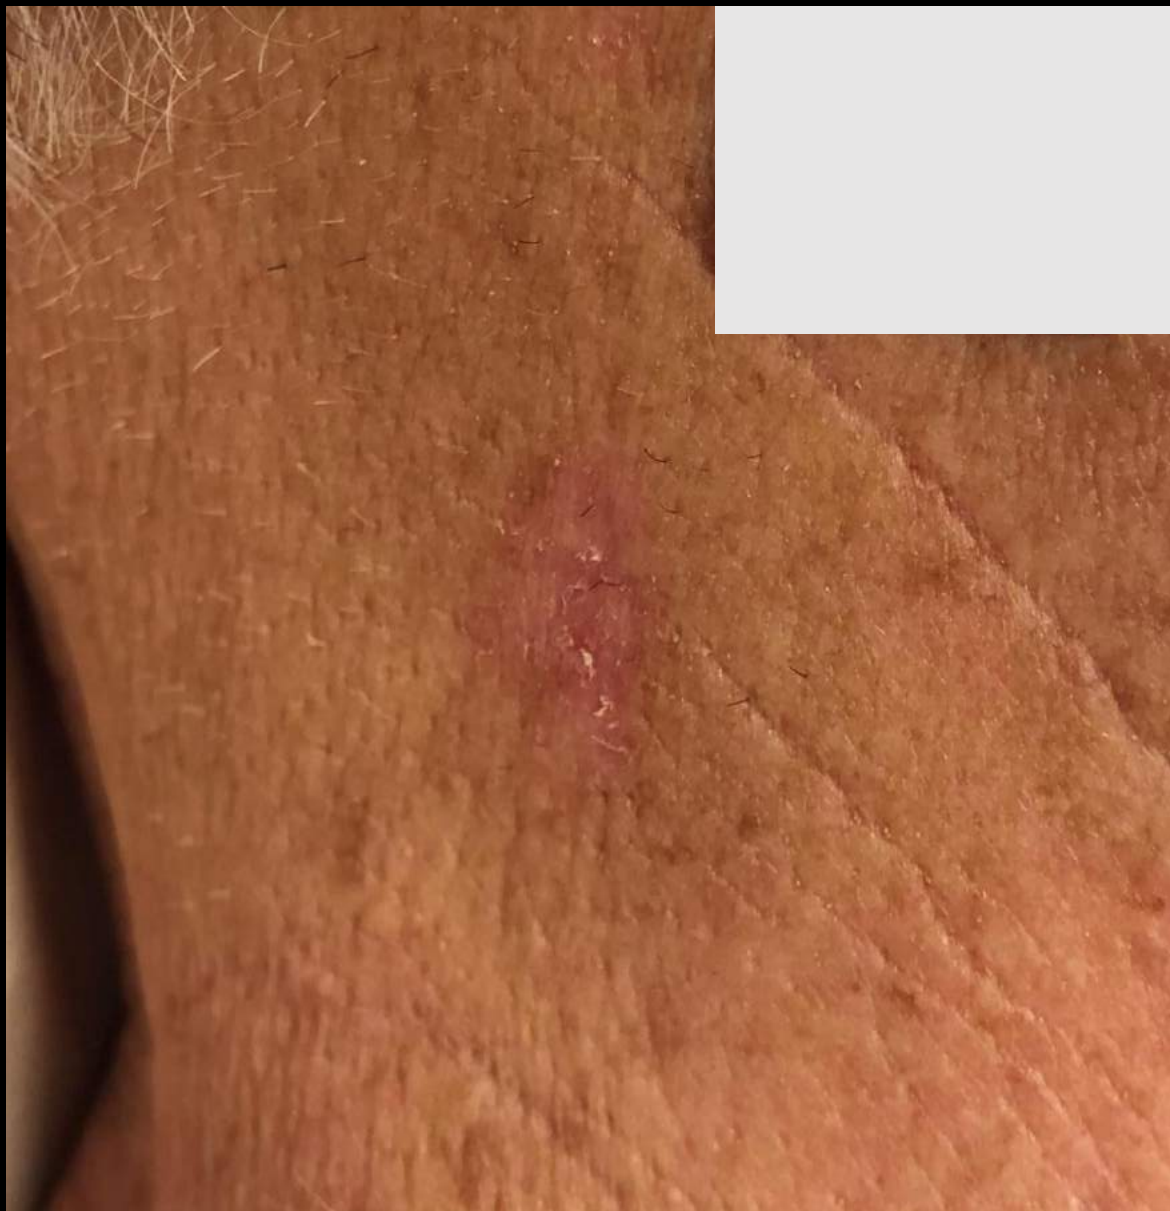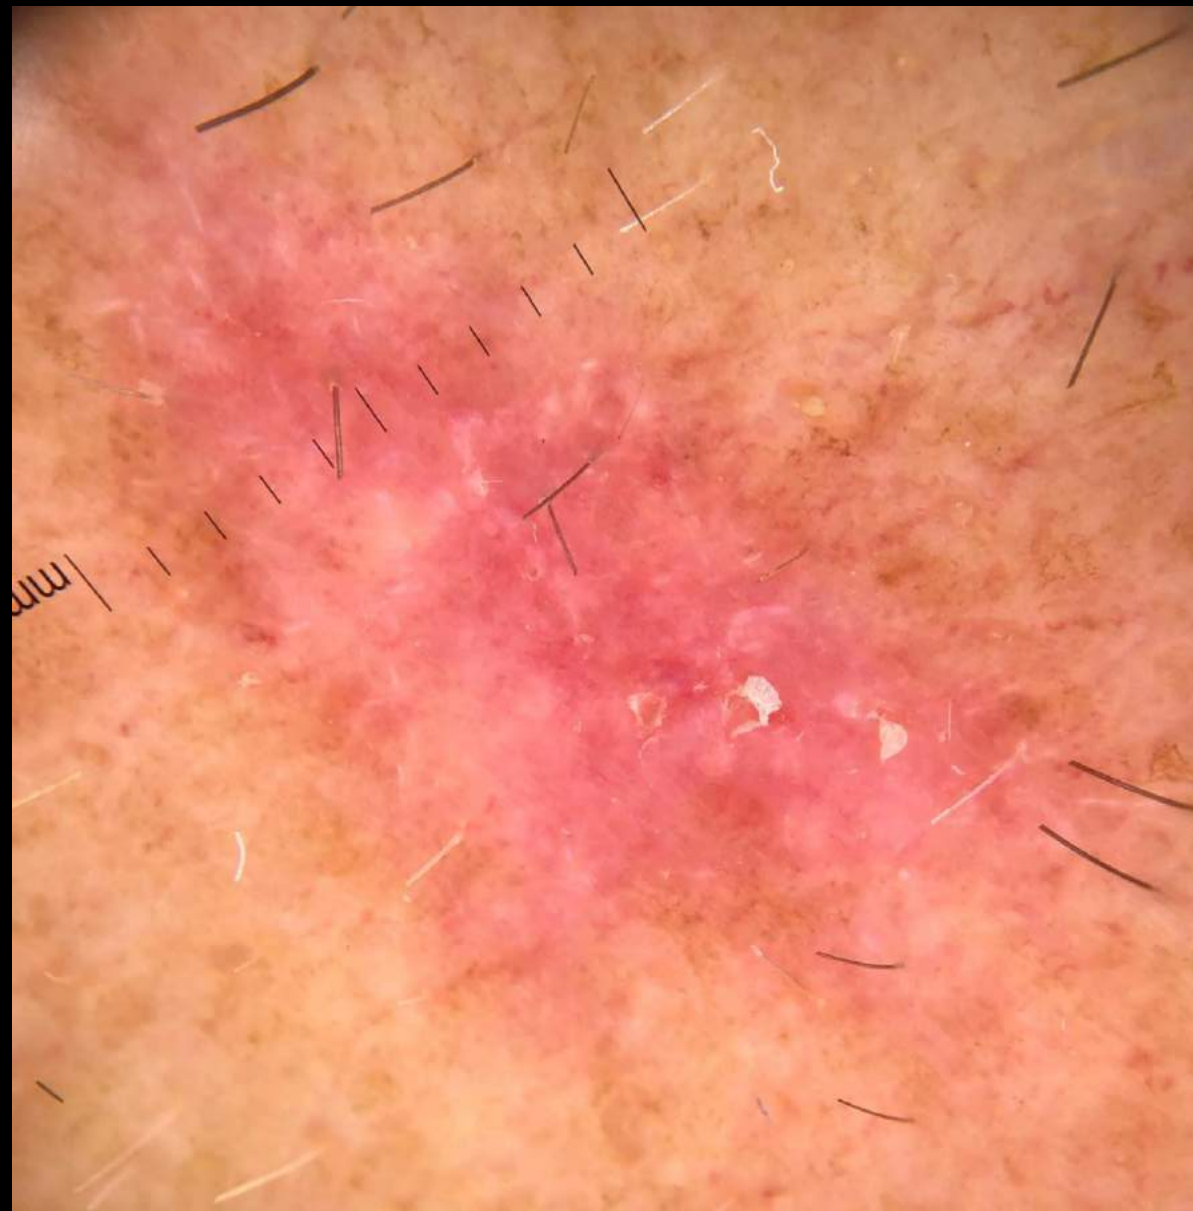

Case number 30

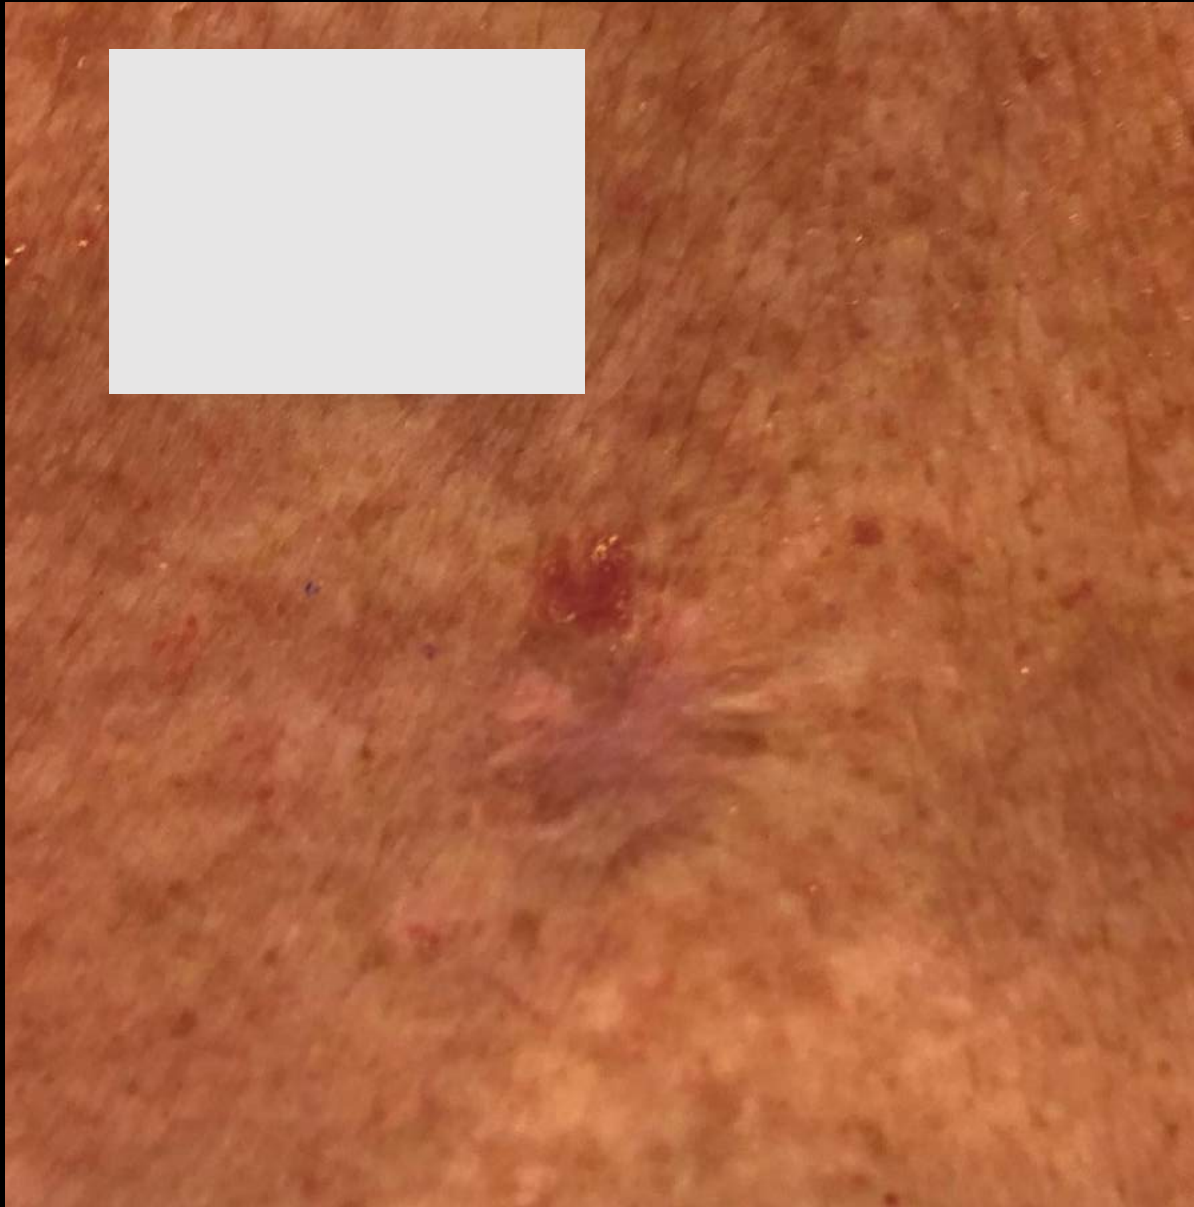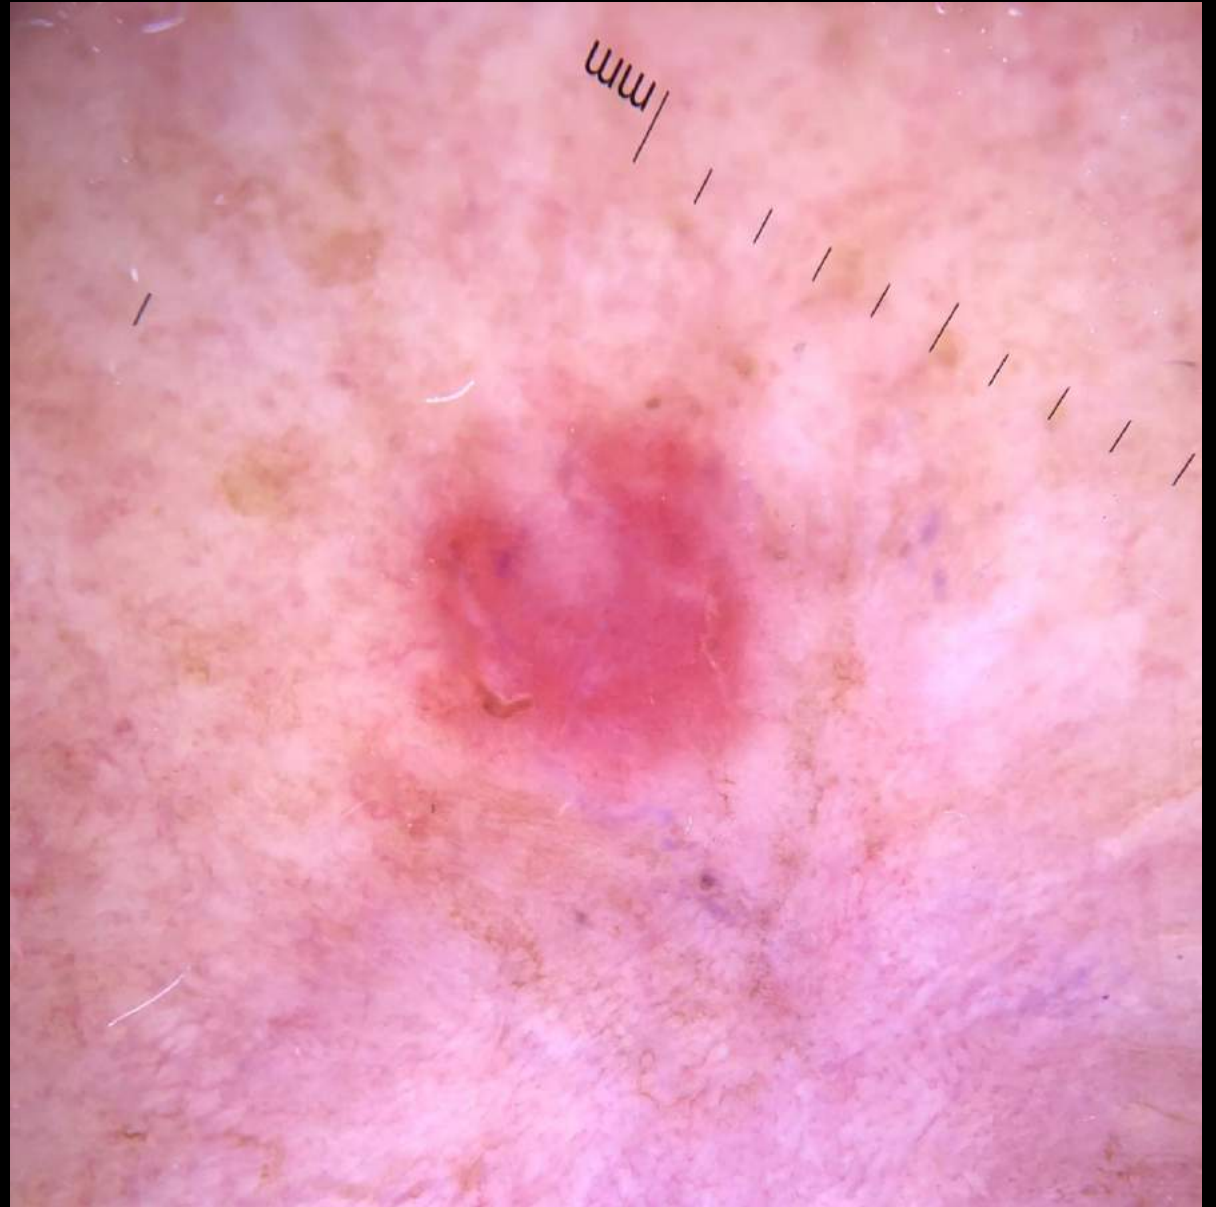

Case number 31



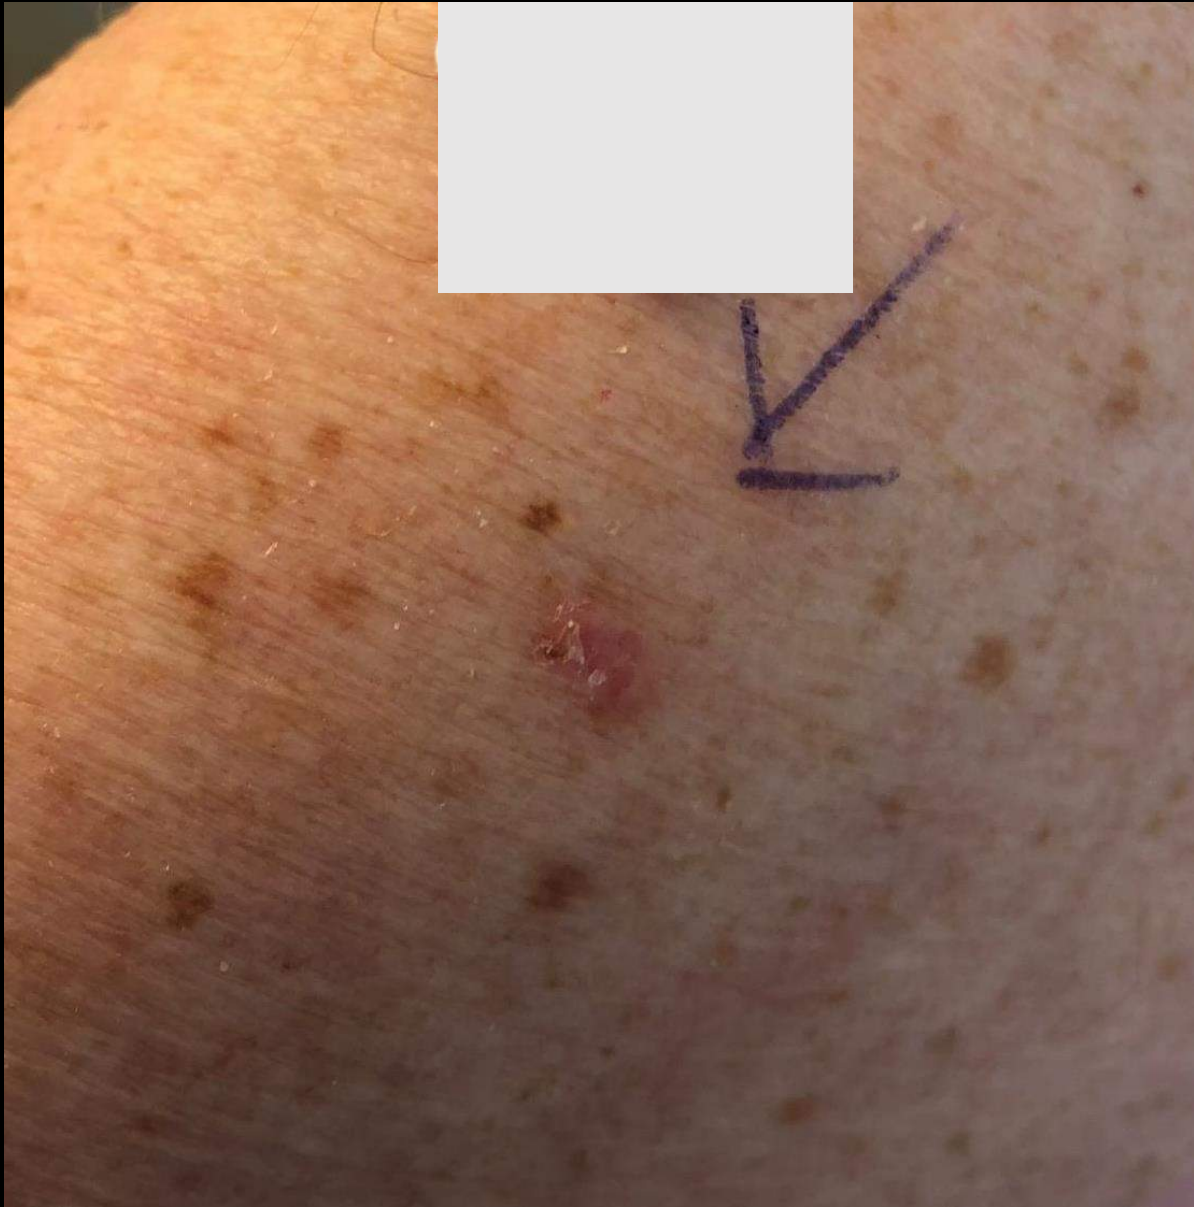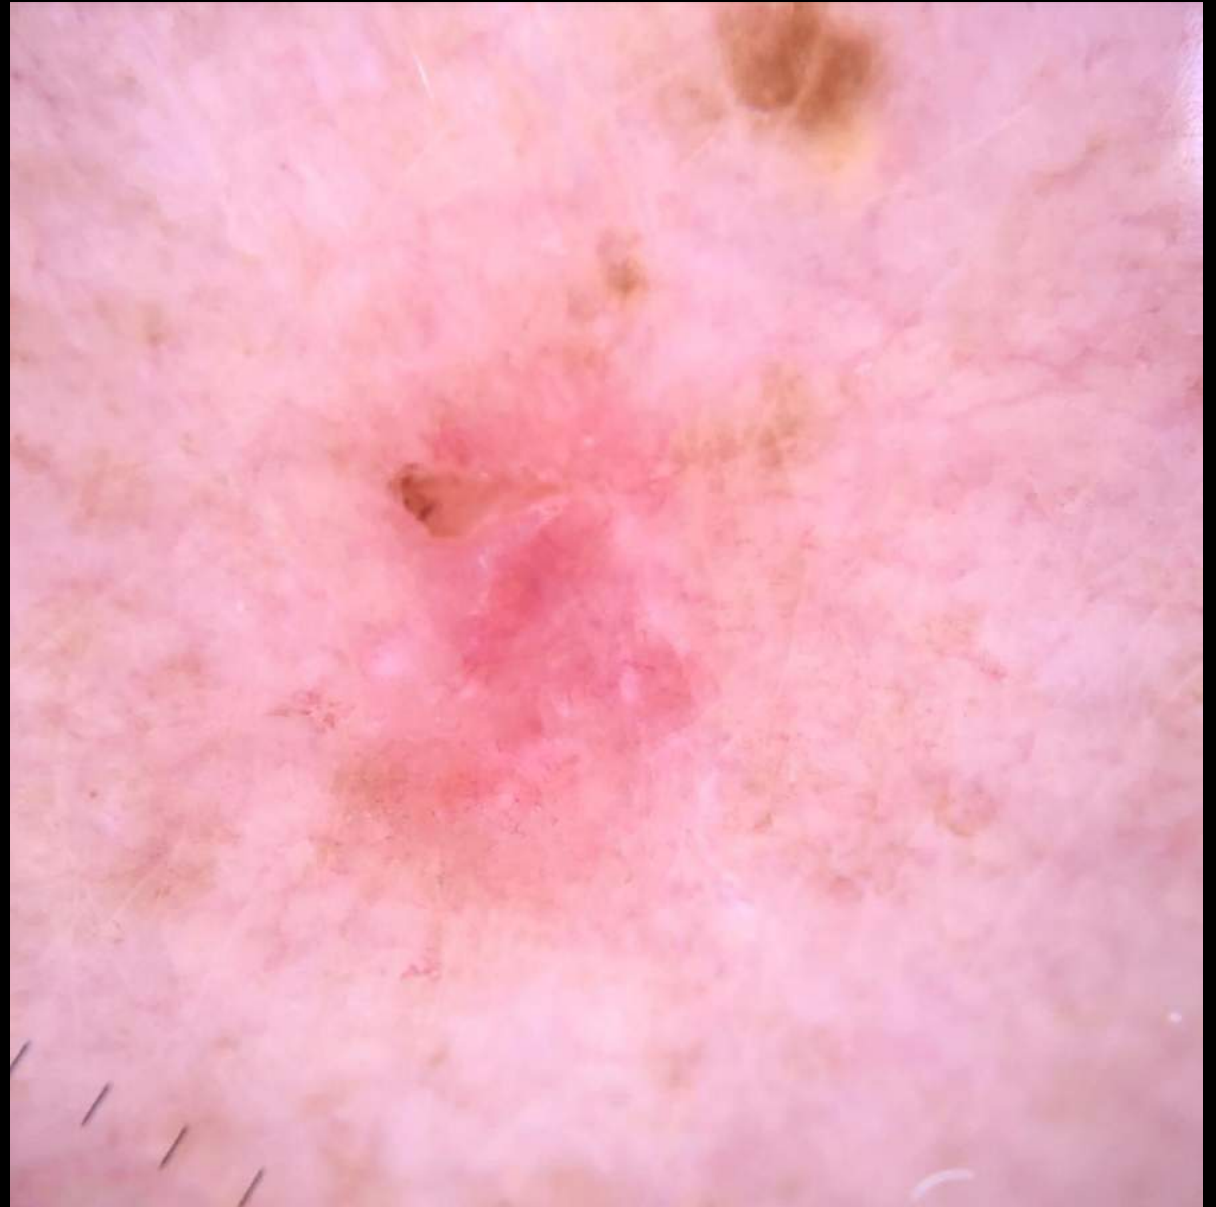

Case number 32



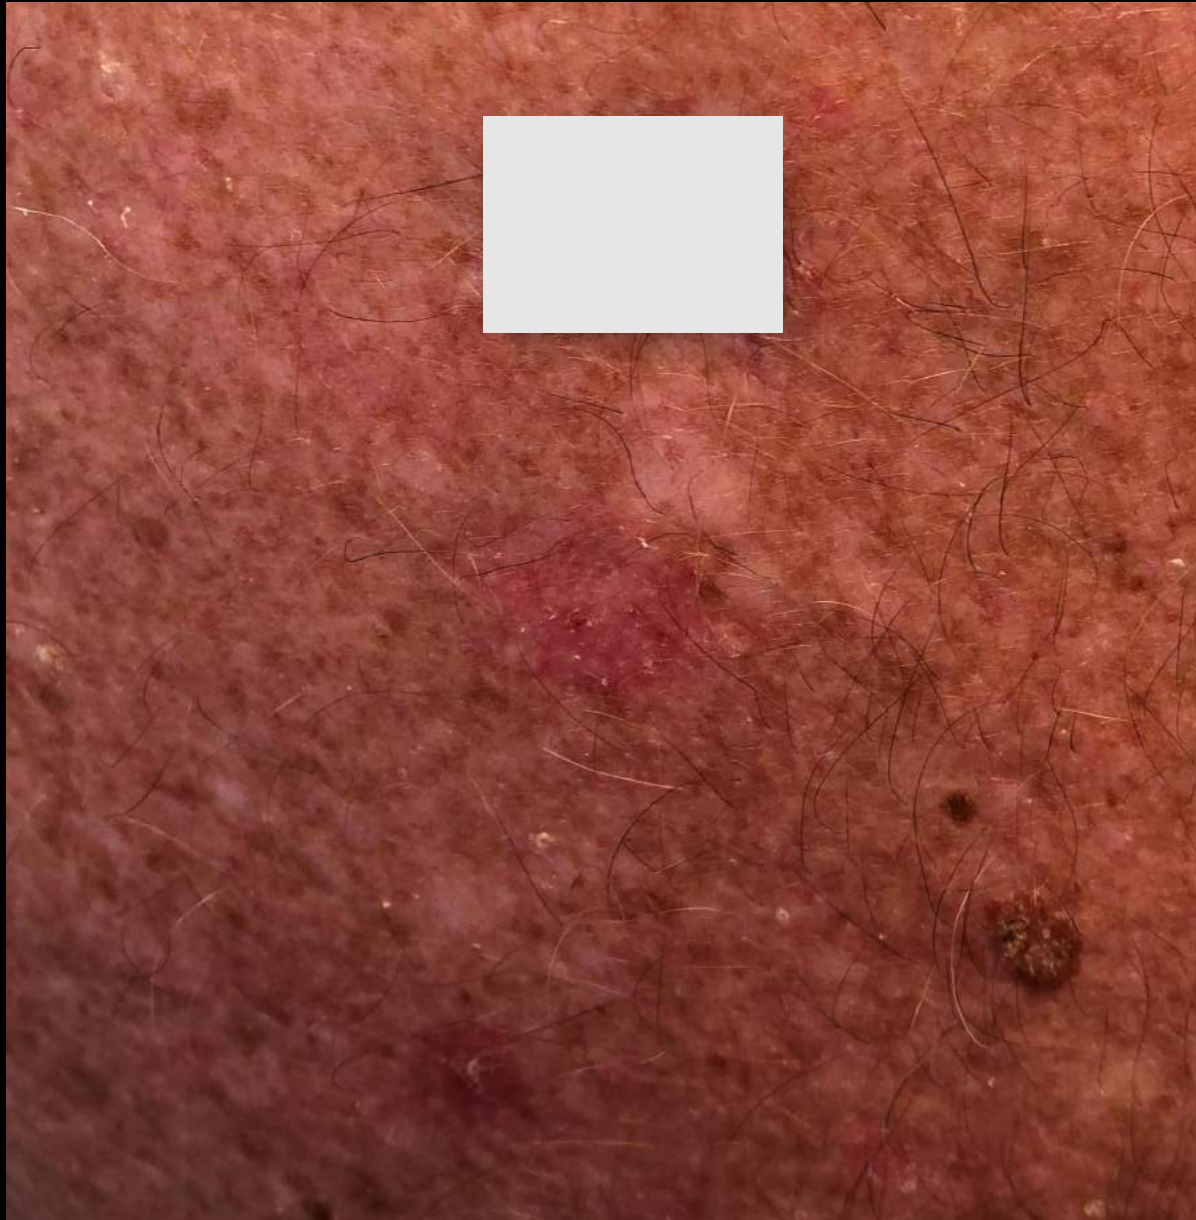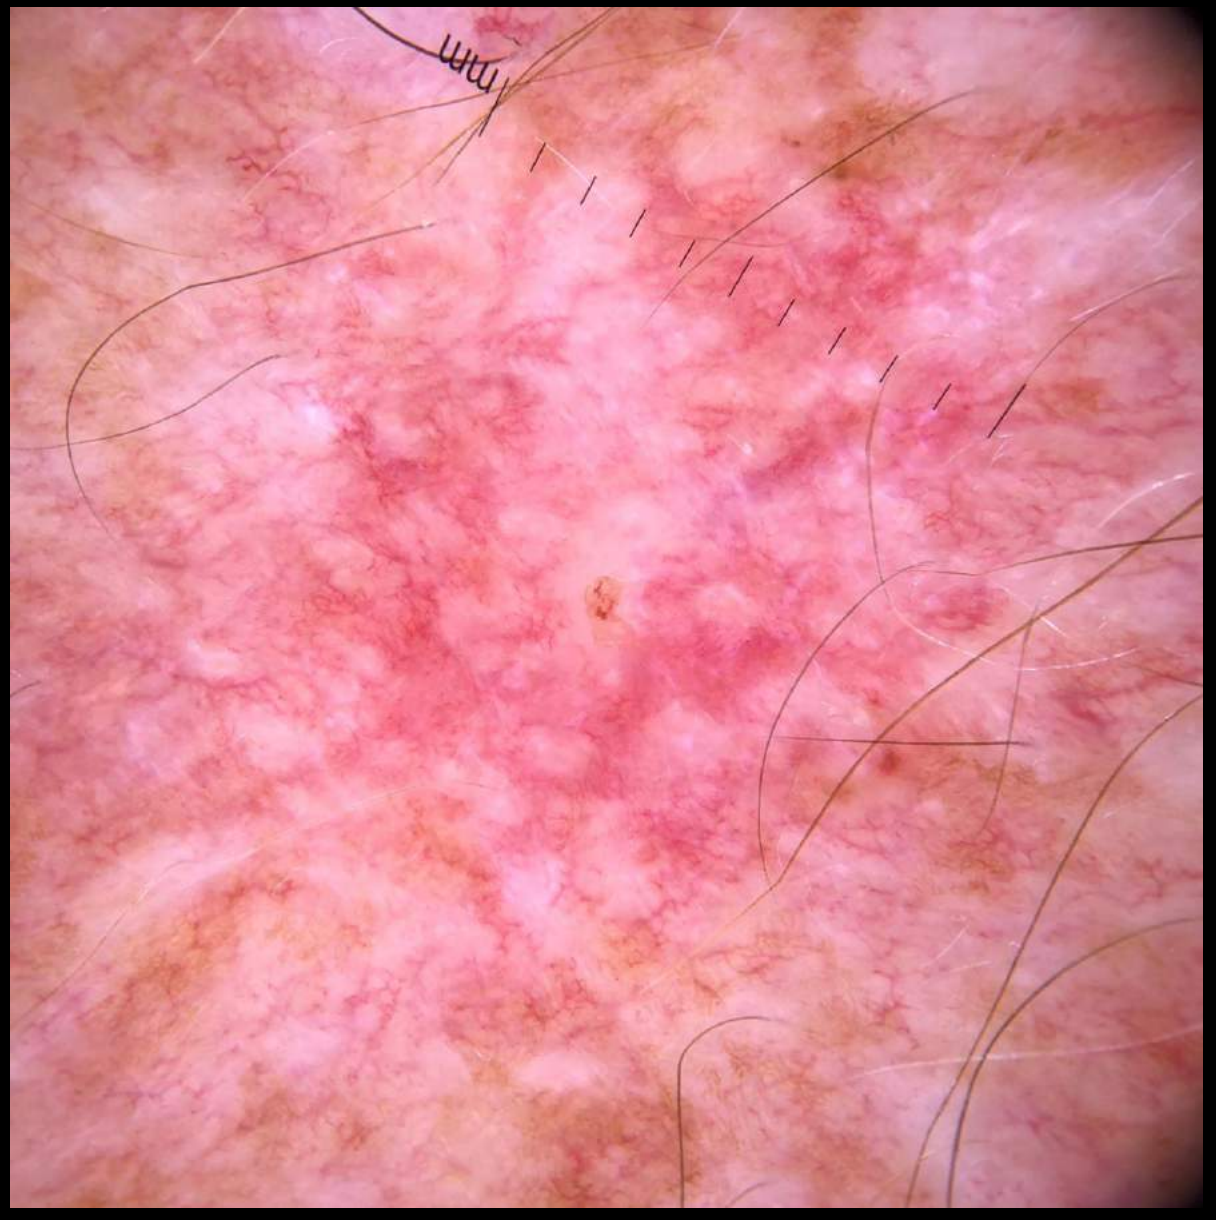

Case number 33



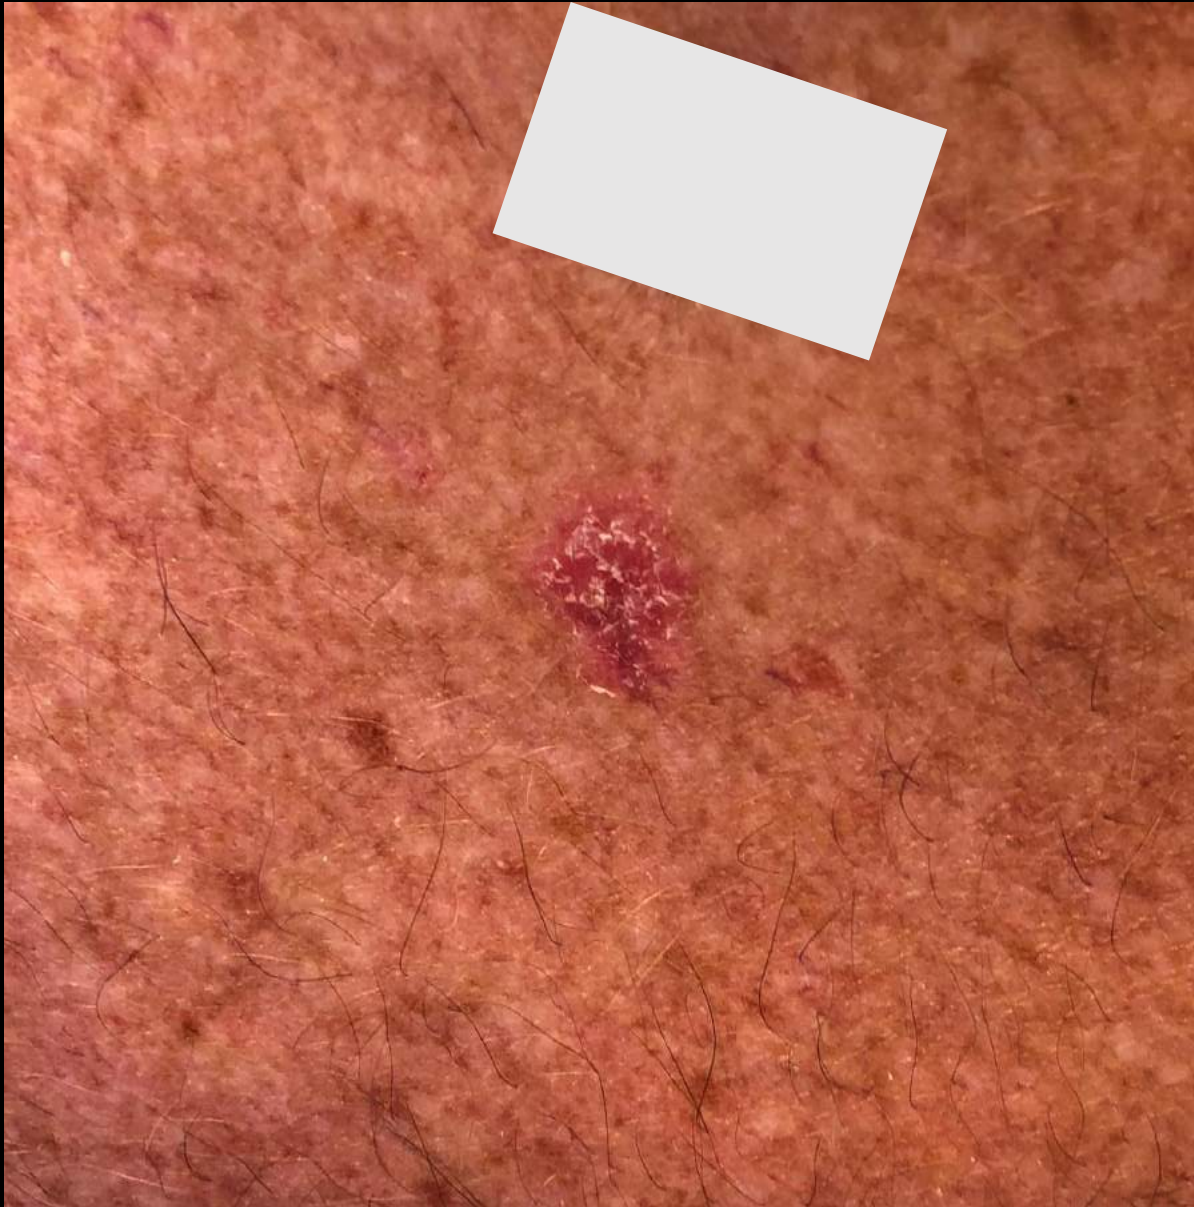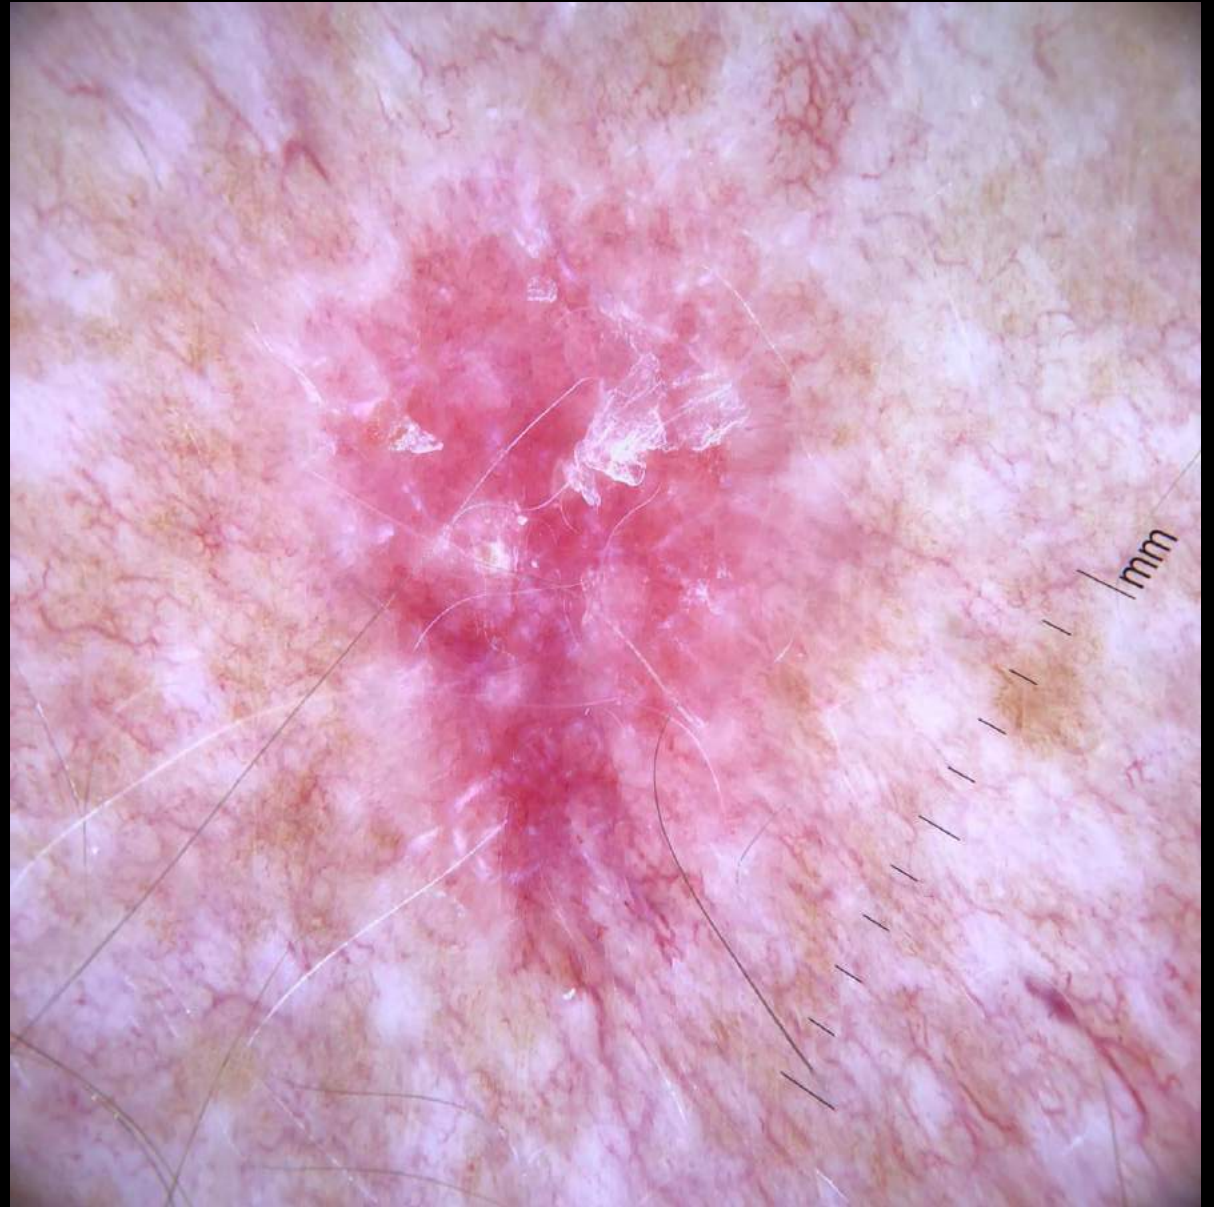

Case number 34



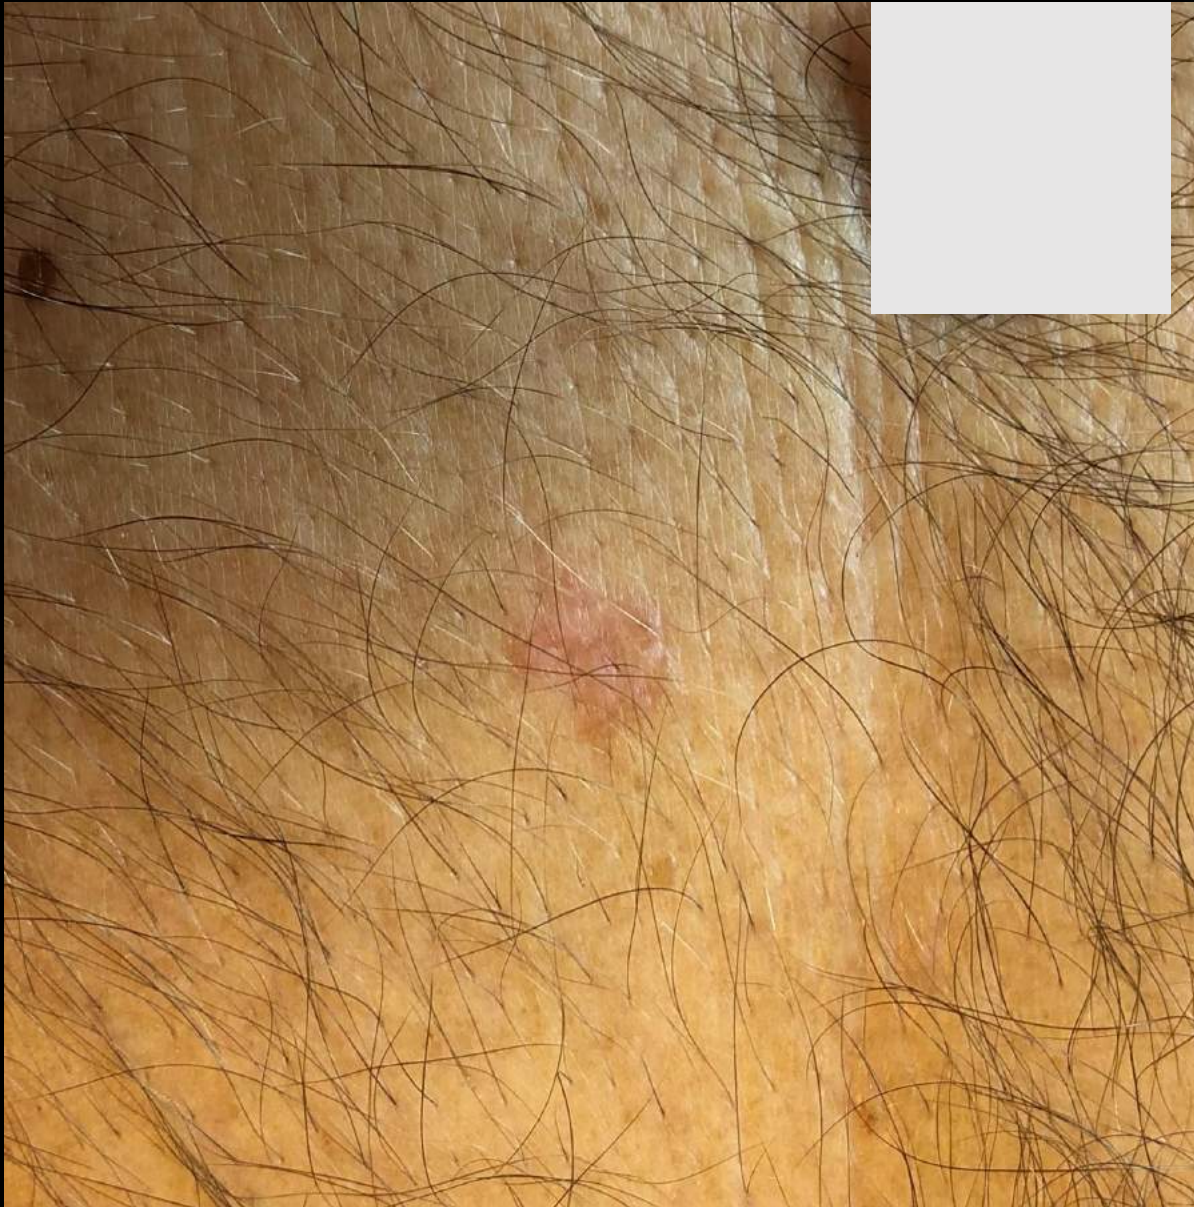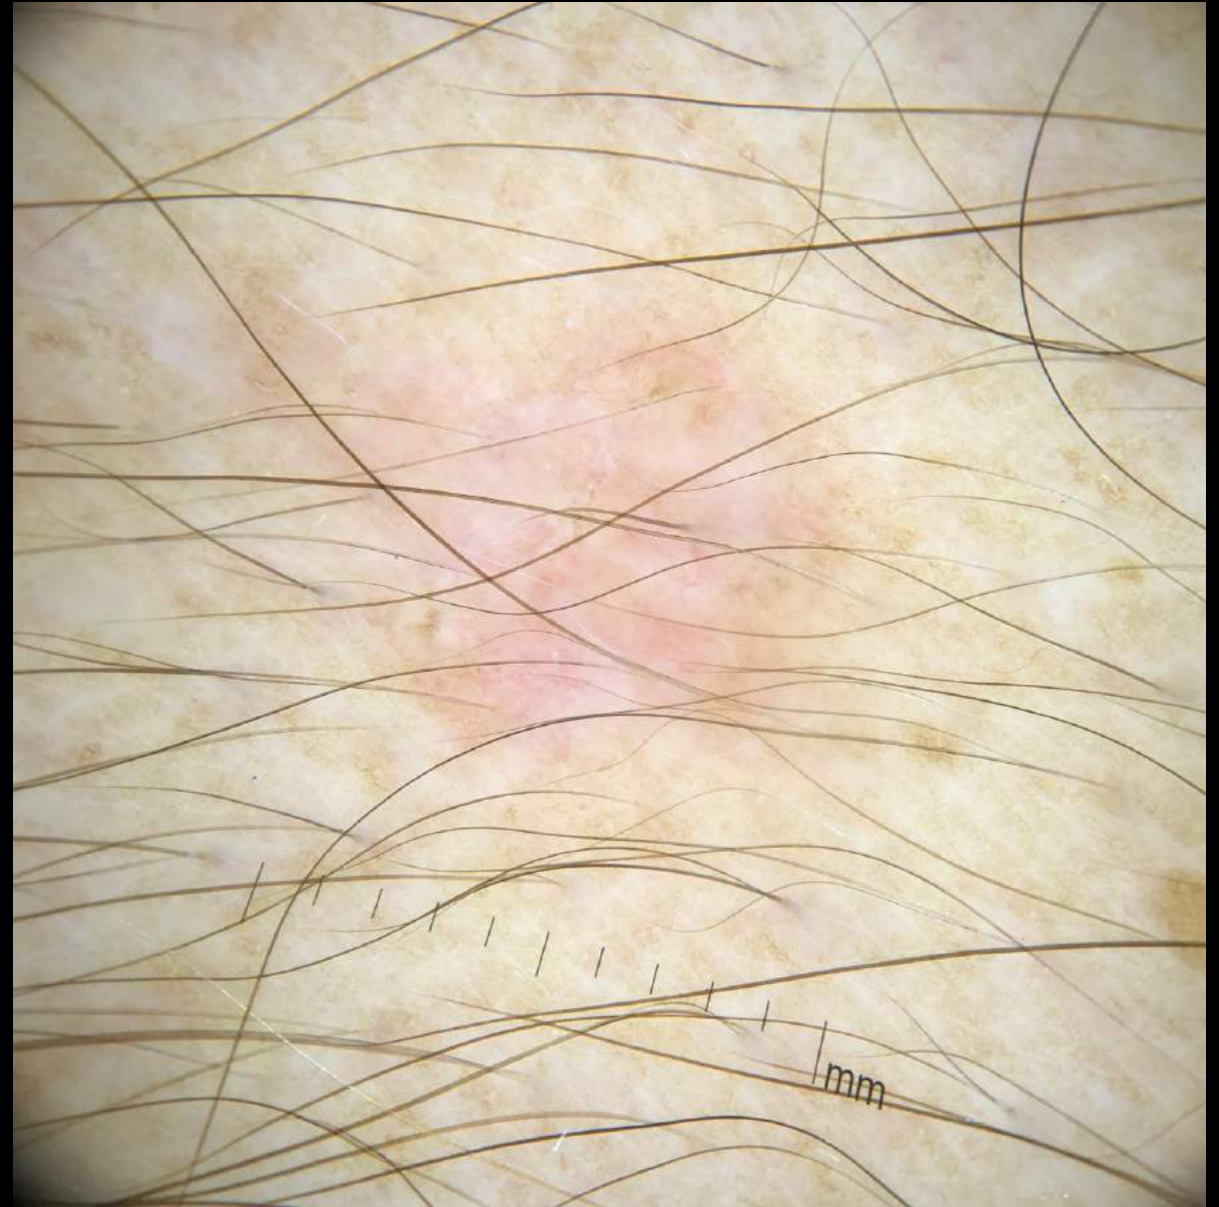

Case number 35



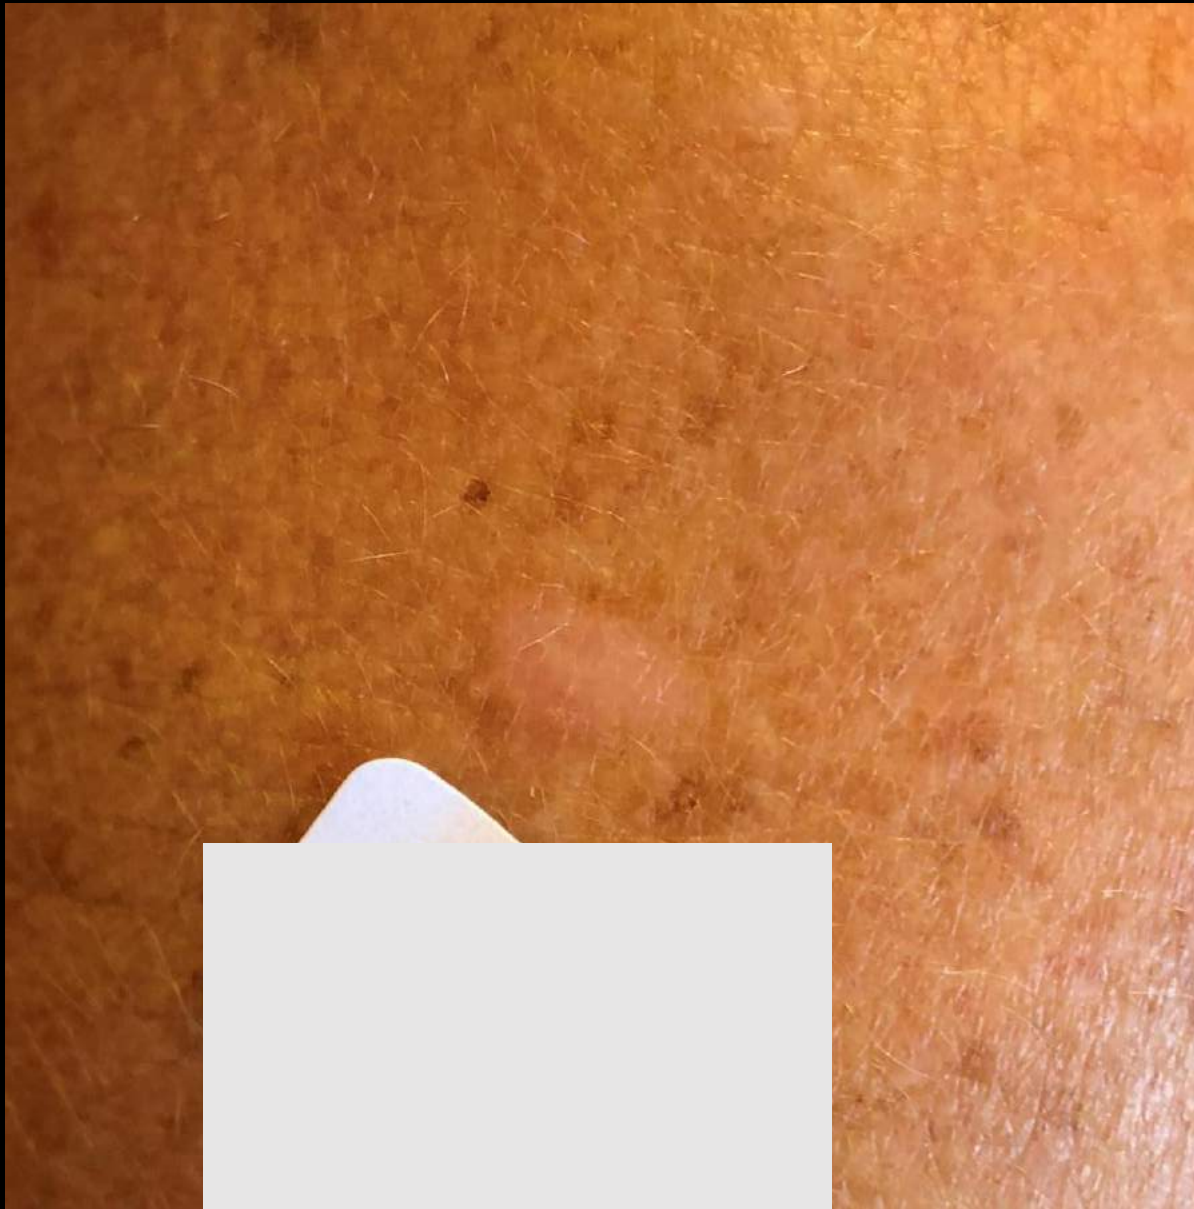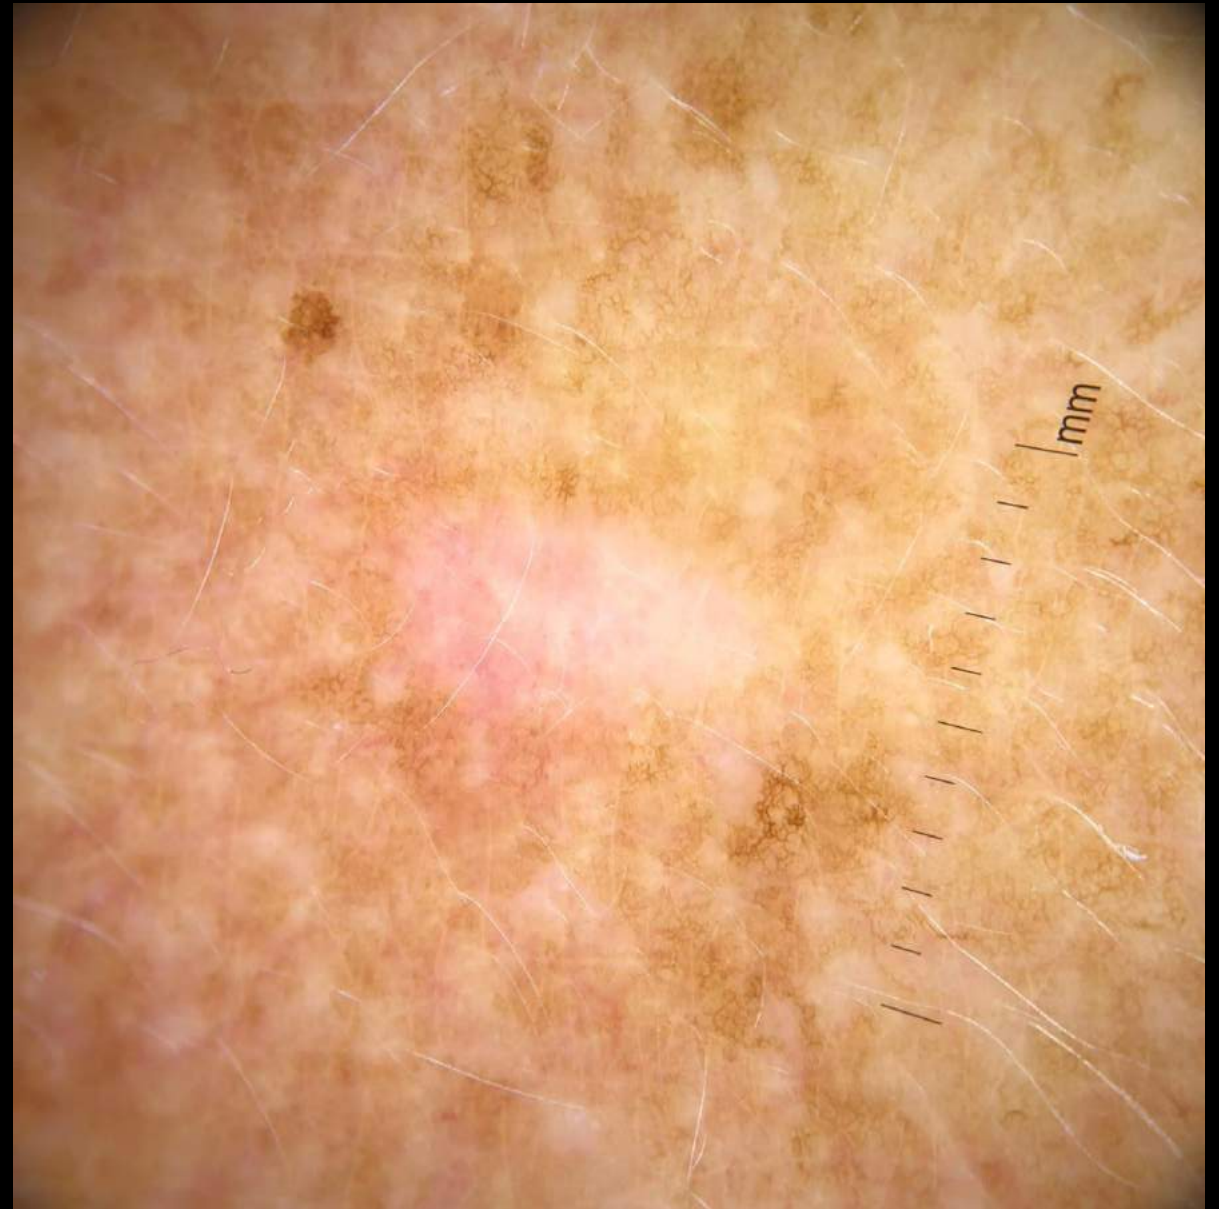

Case number 36



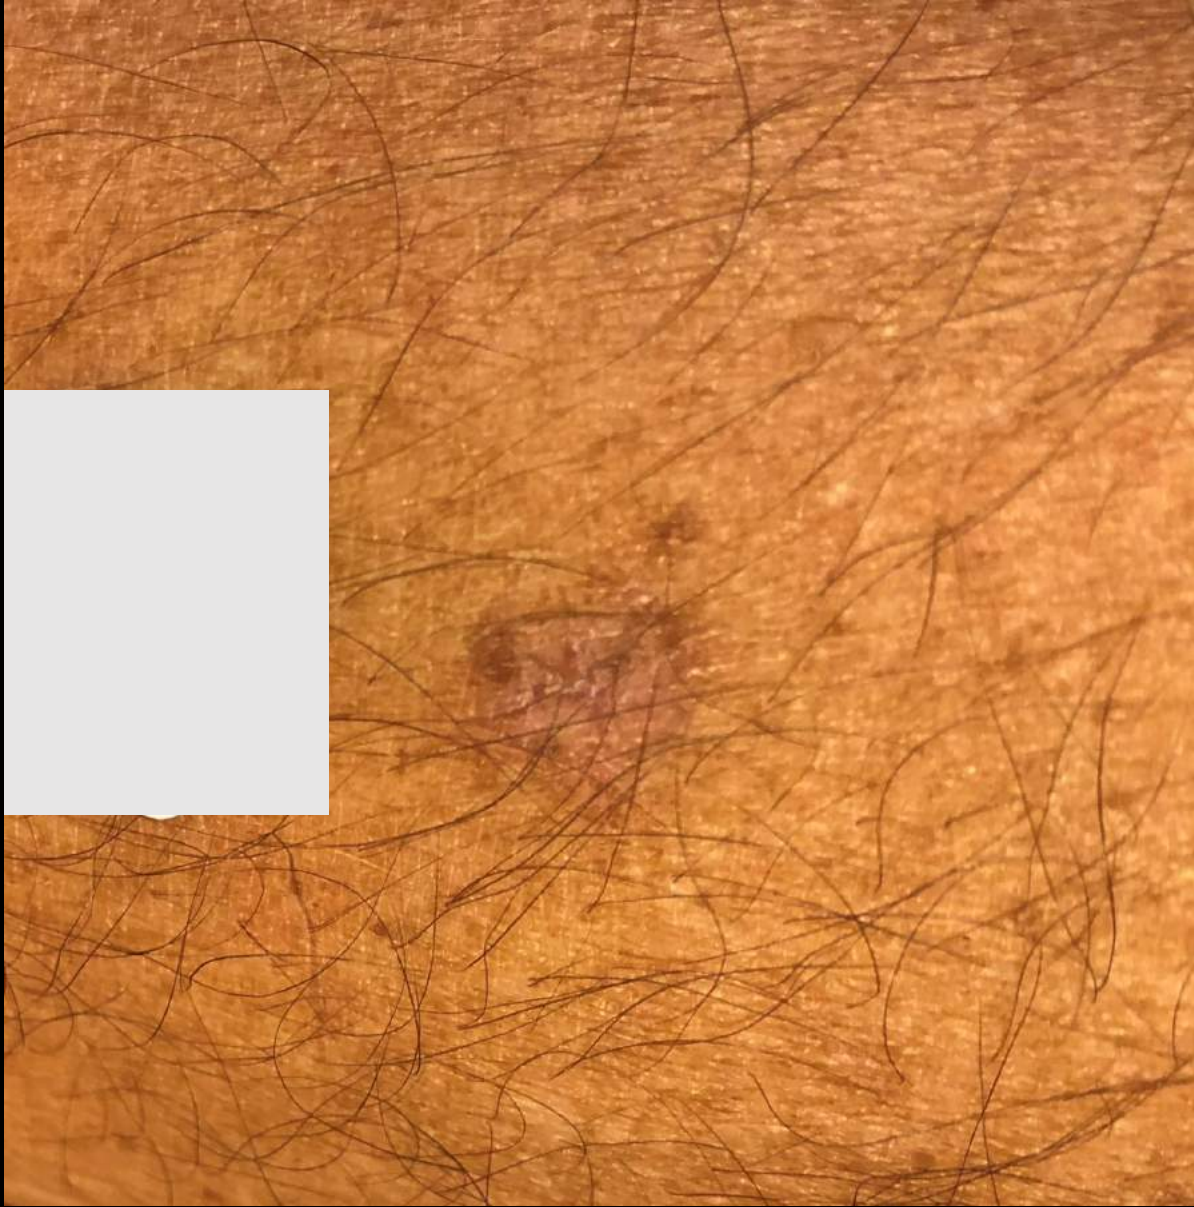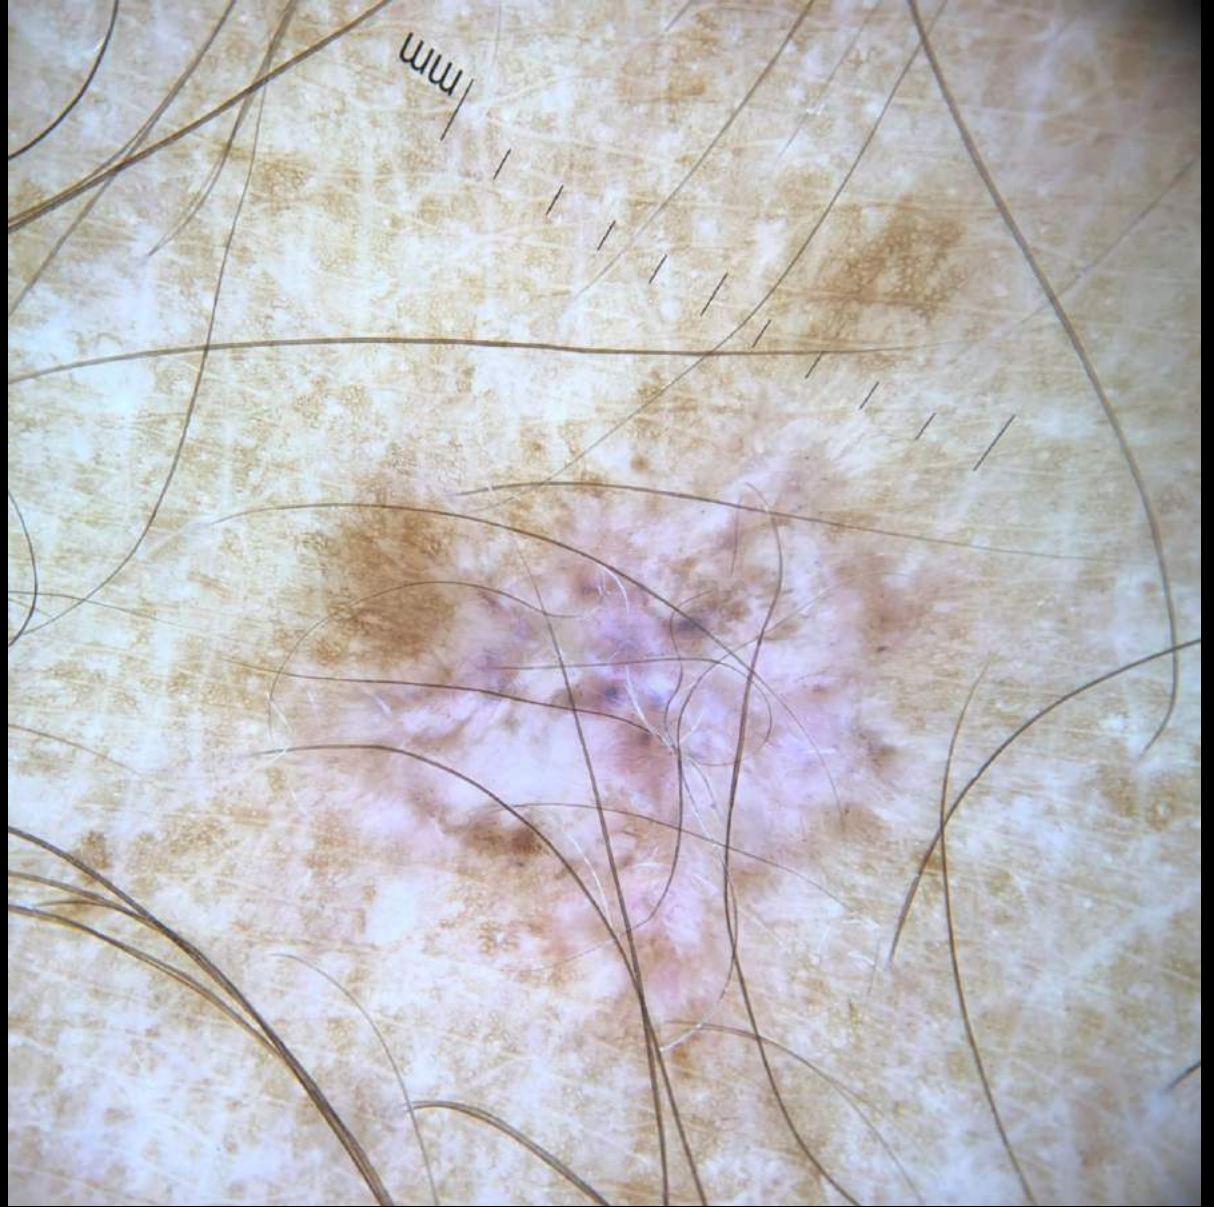

Case number 37



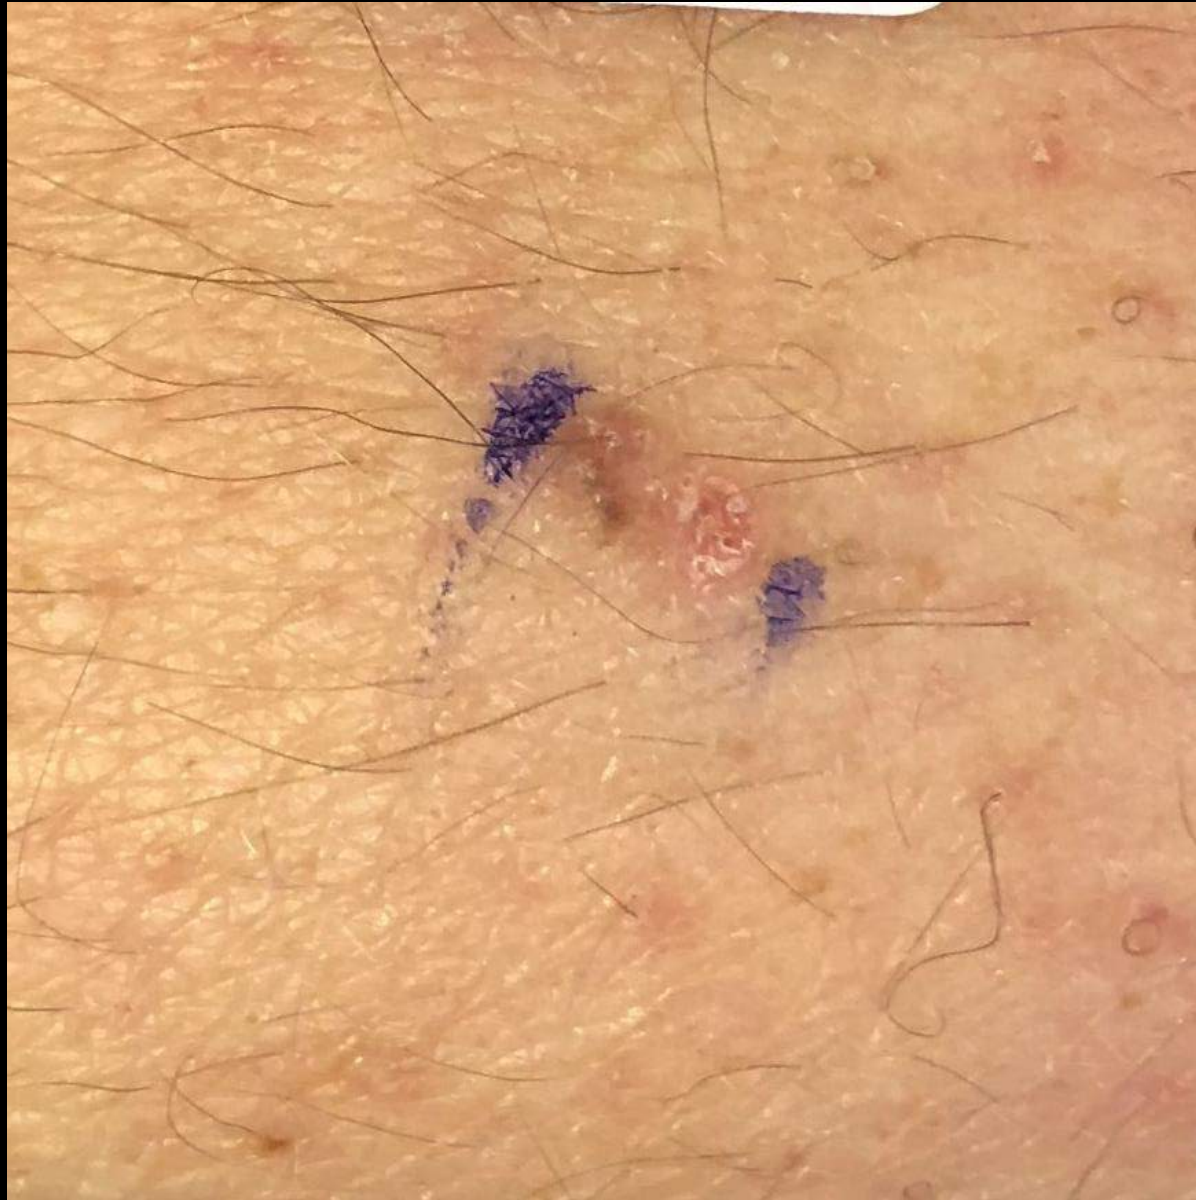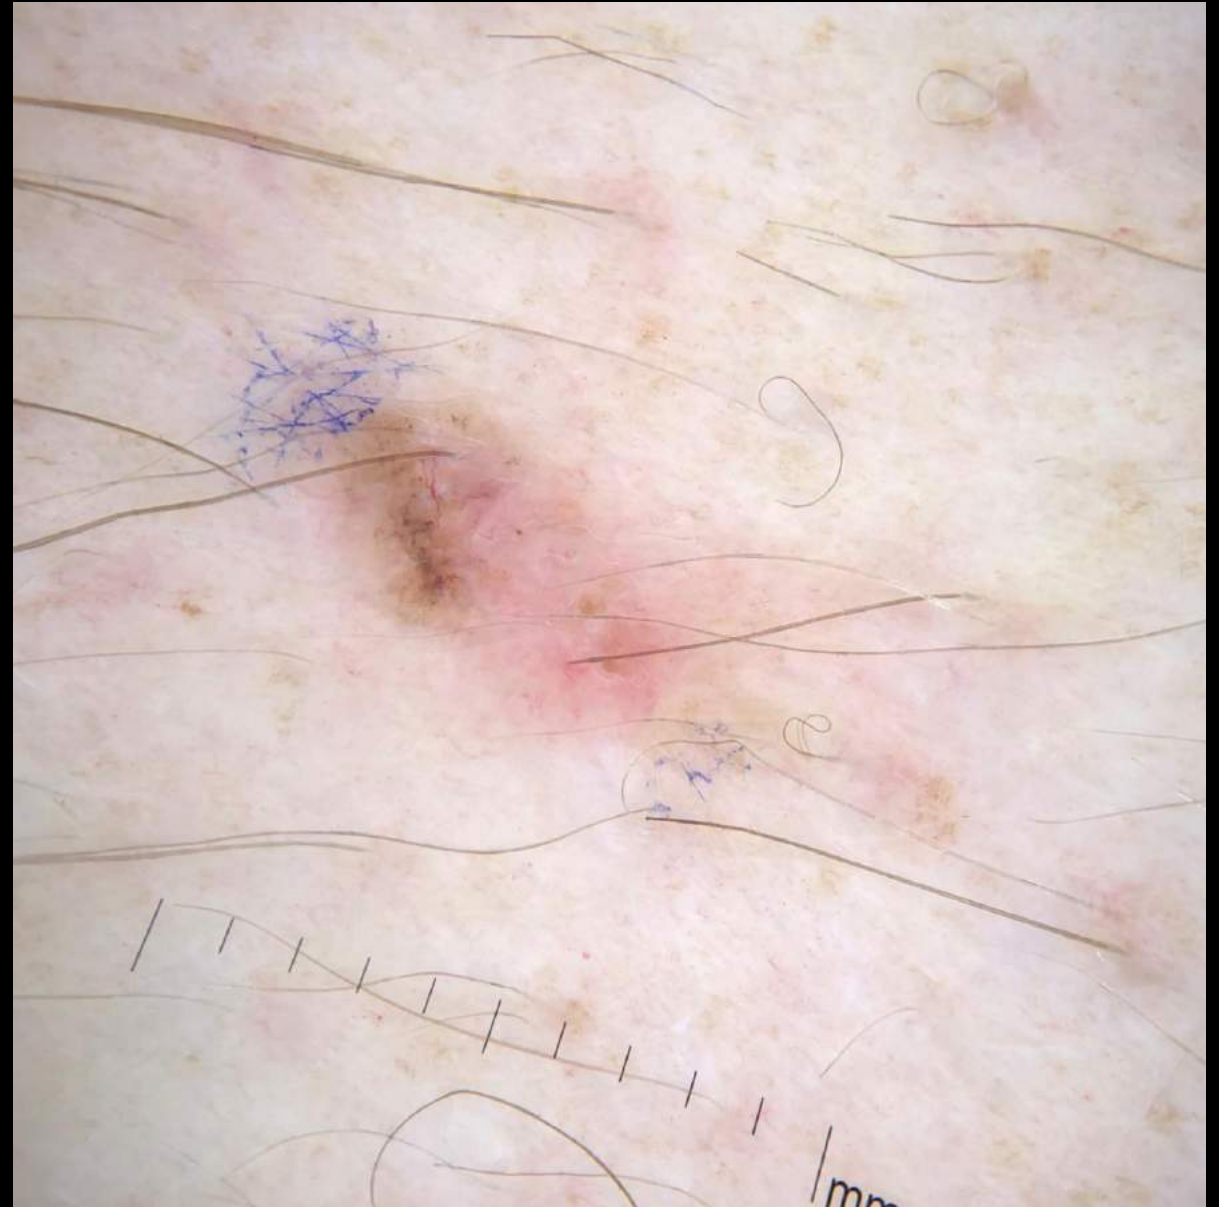

Case number 38



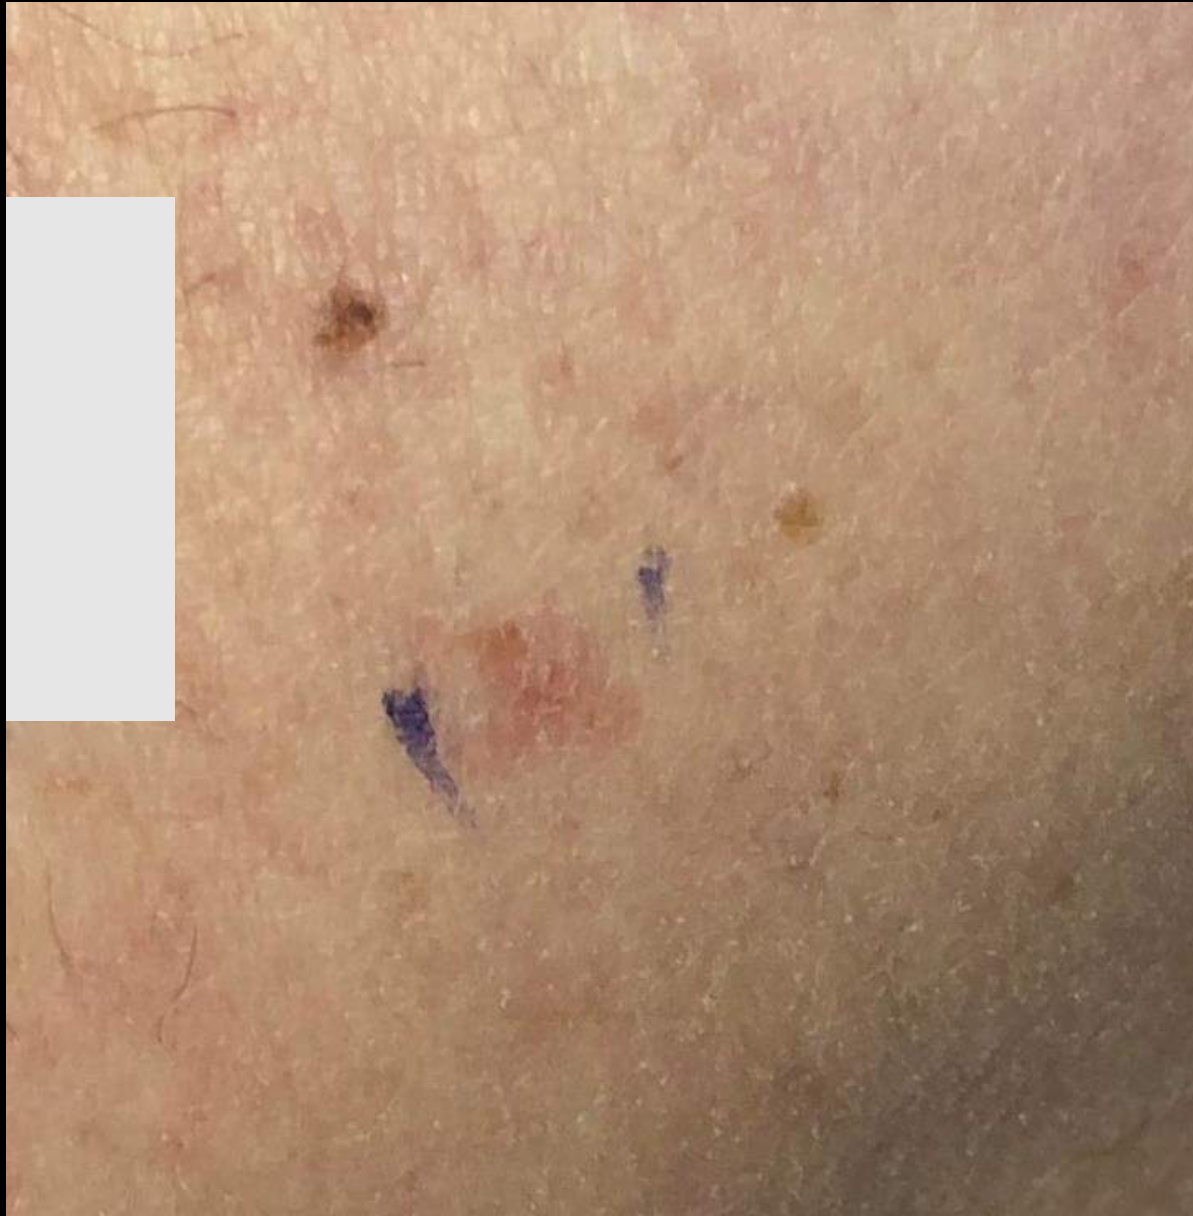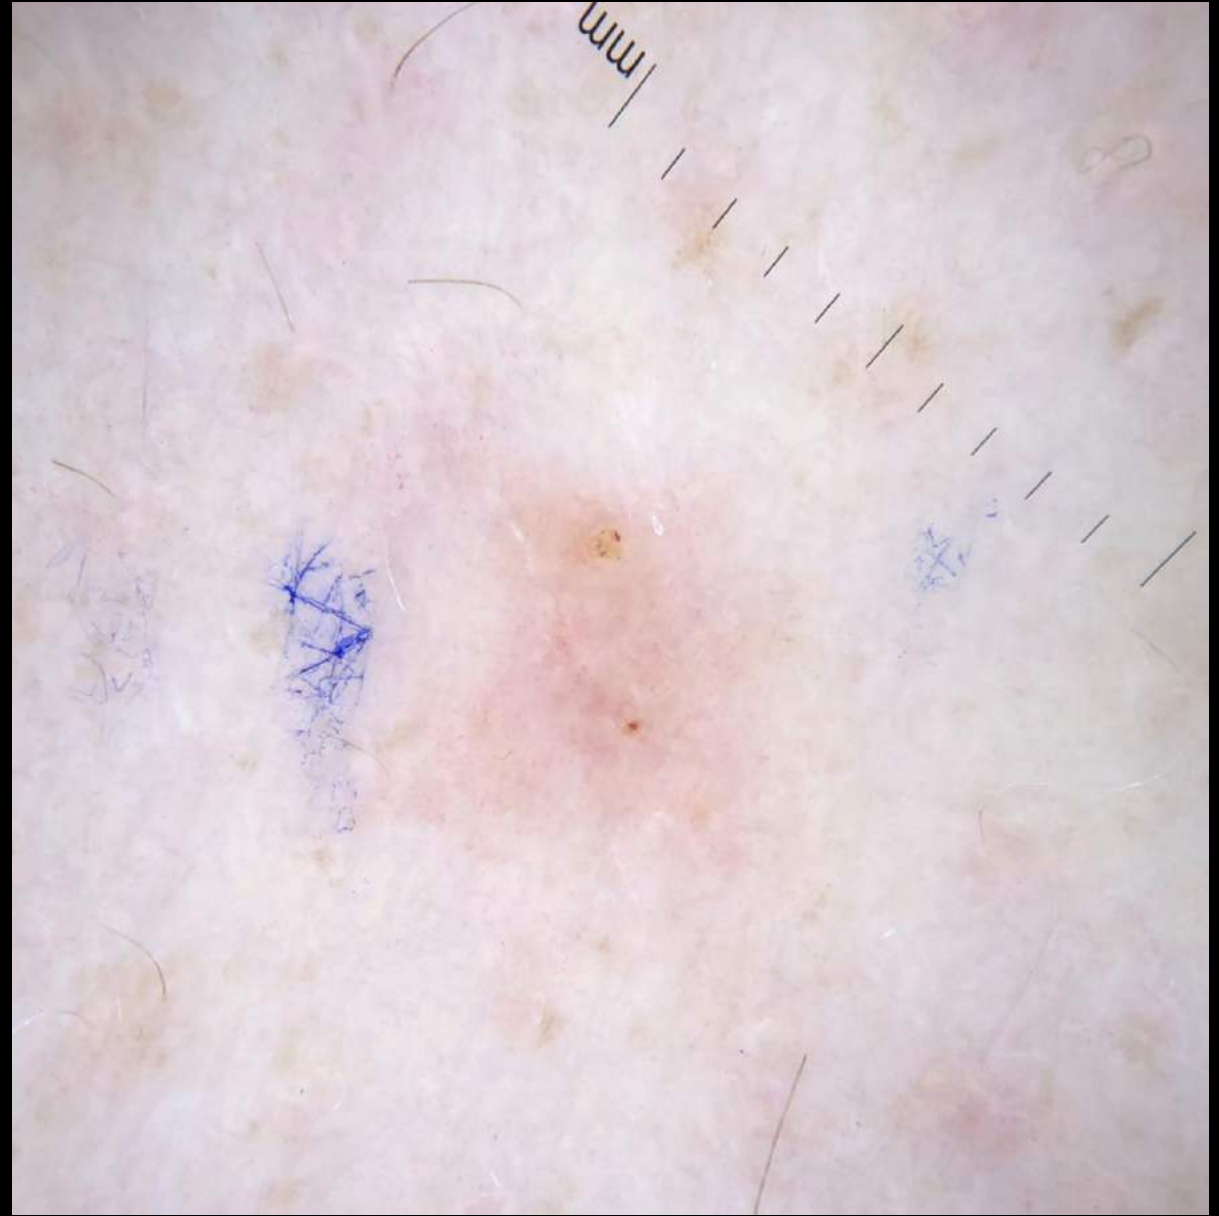

Case number 39



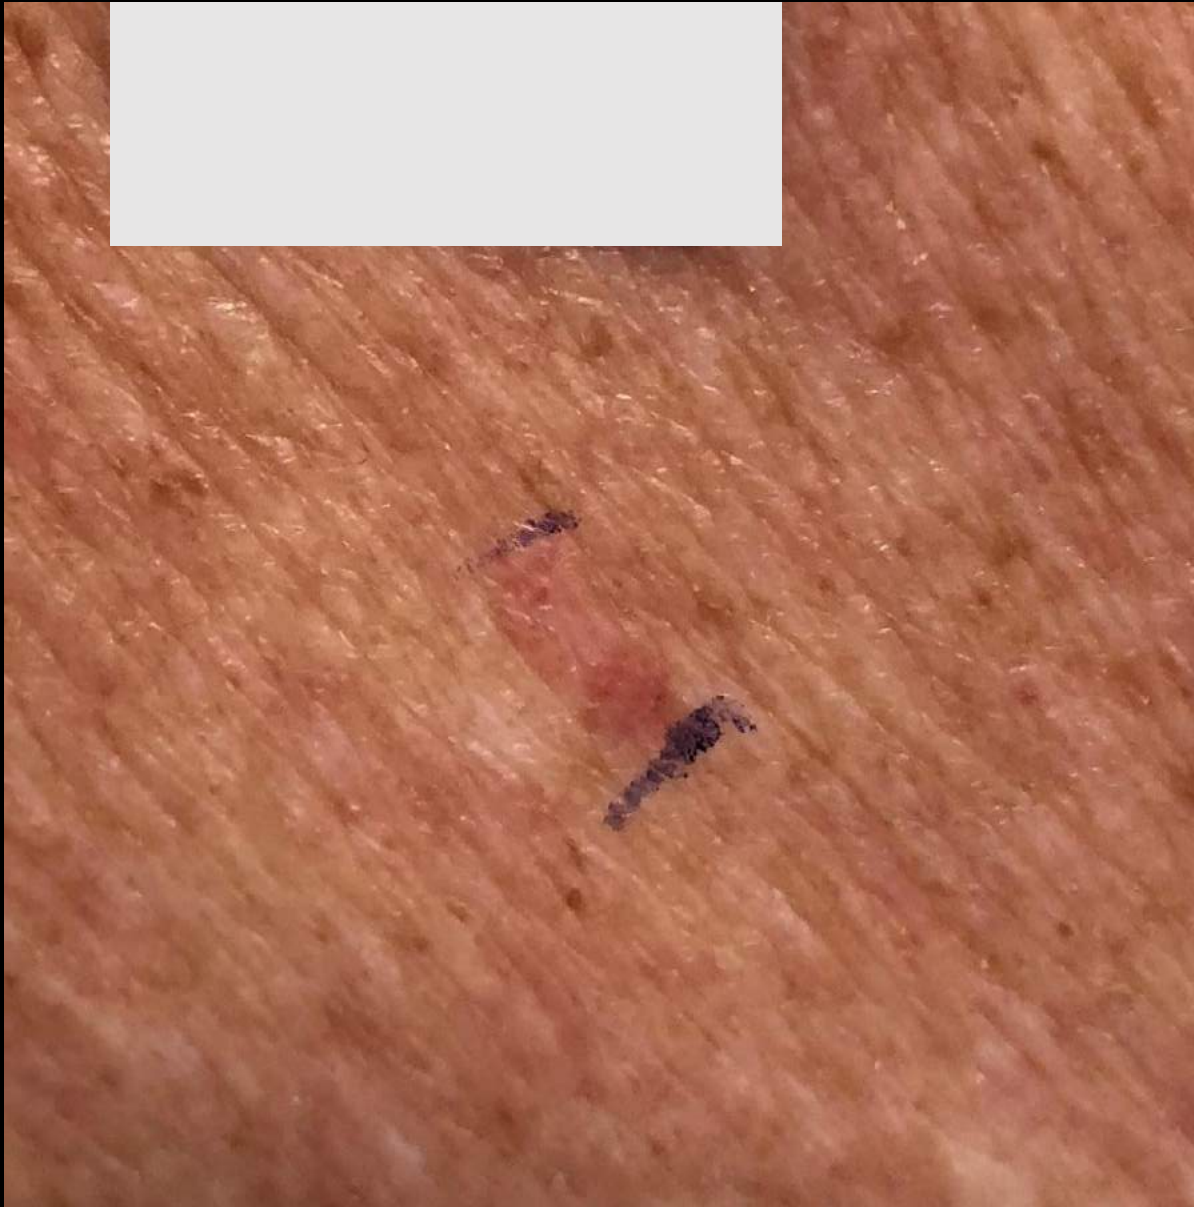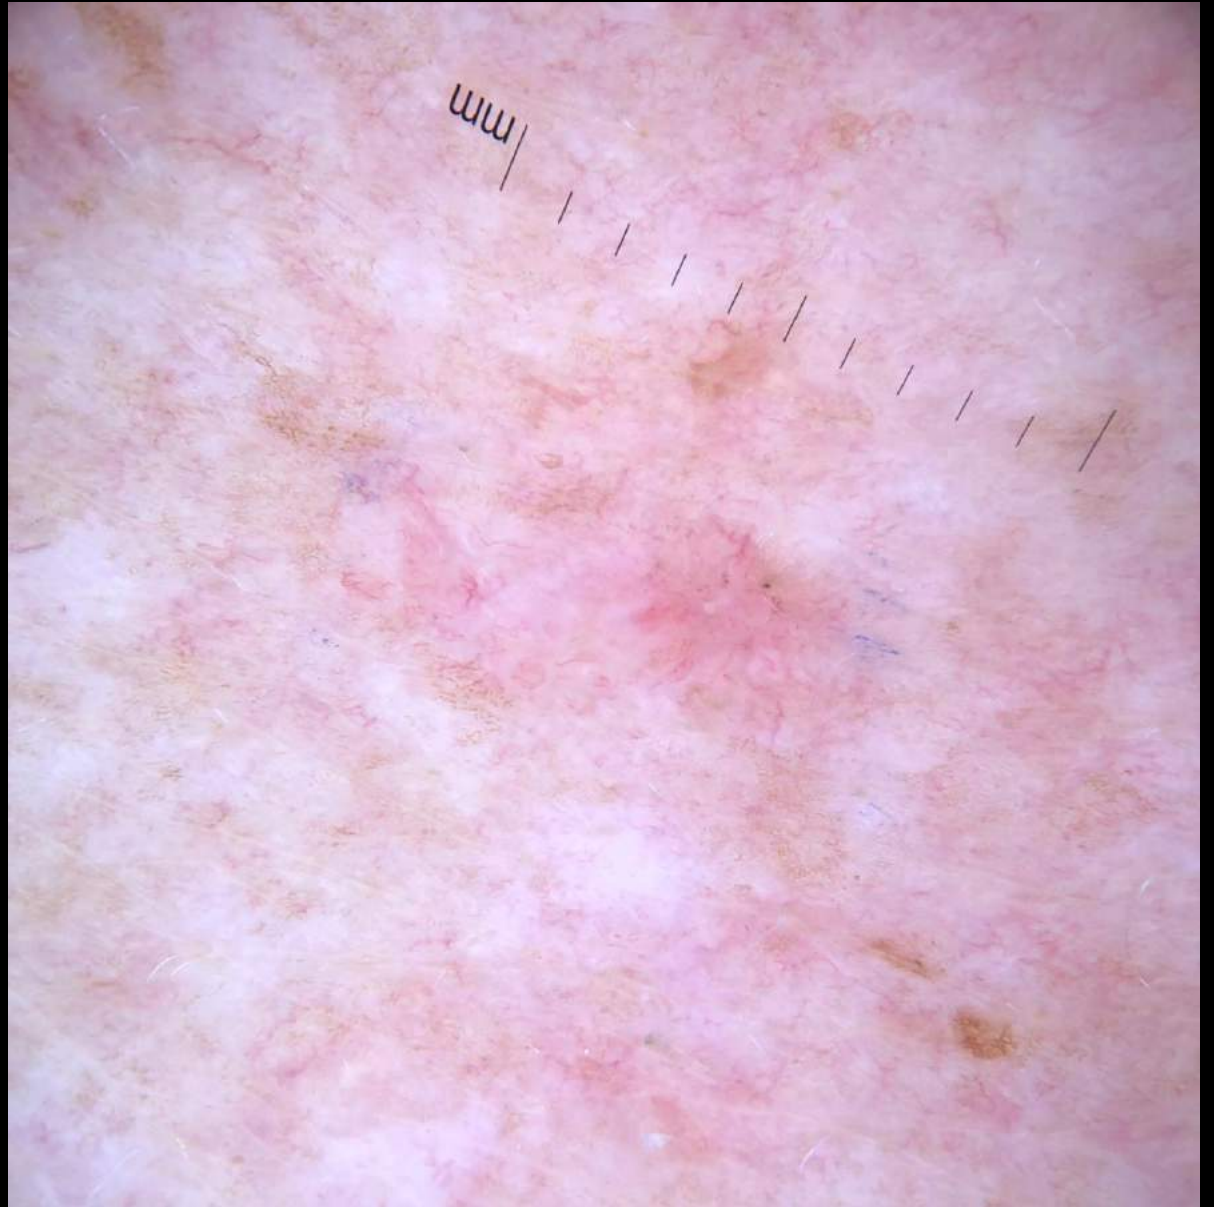

Case number 40



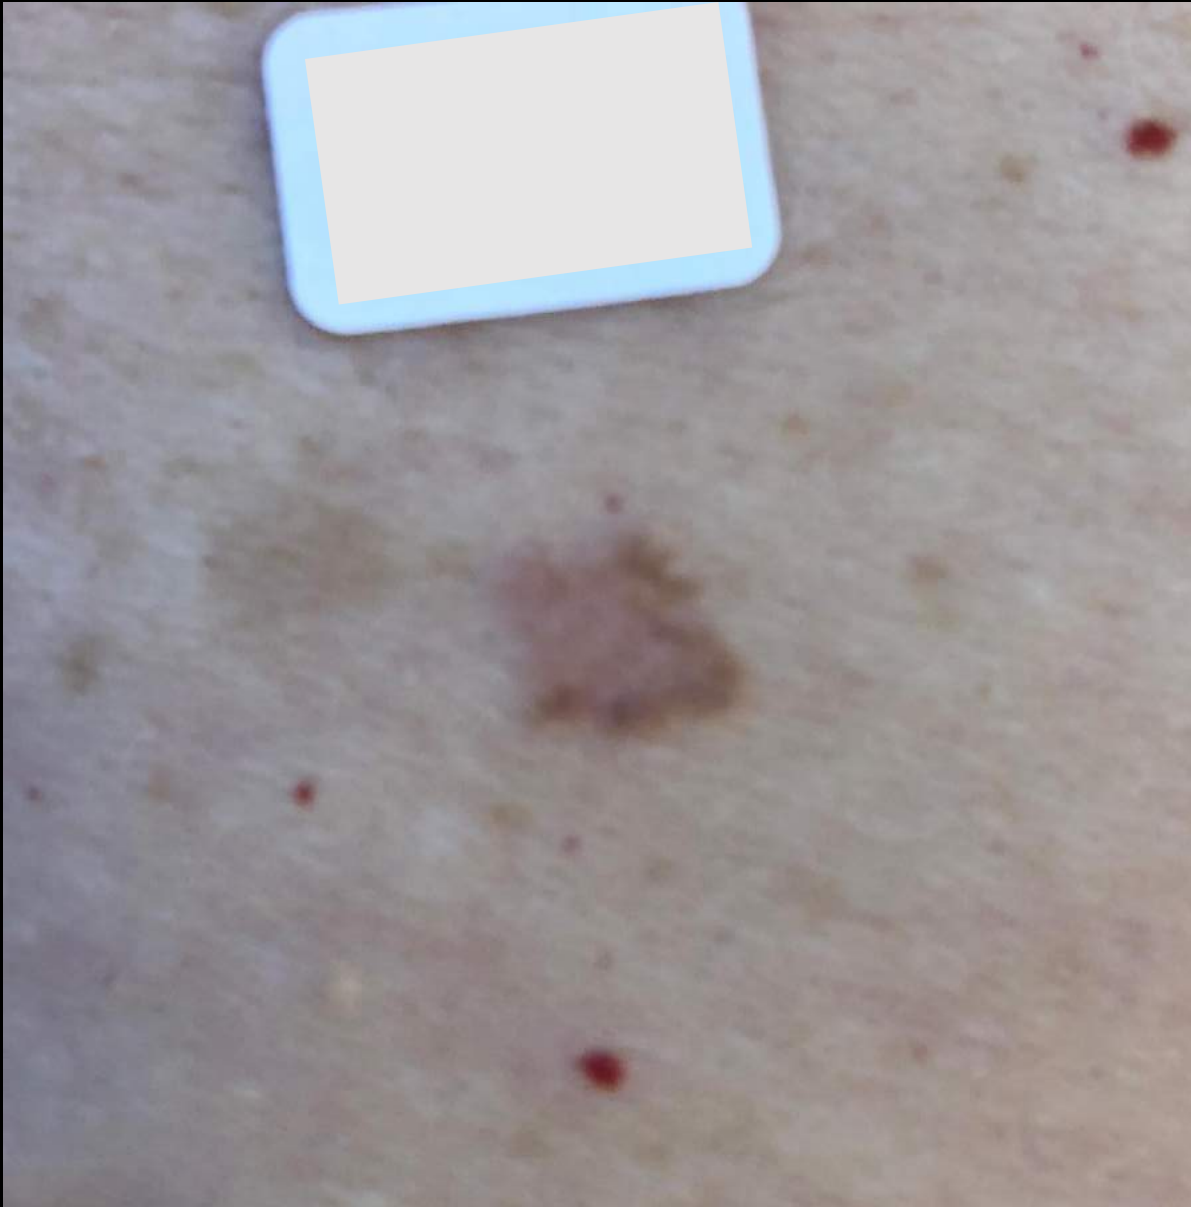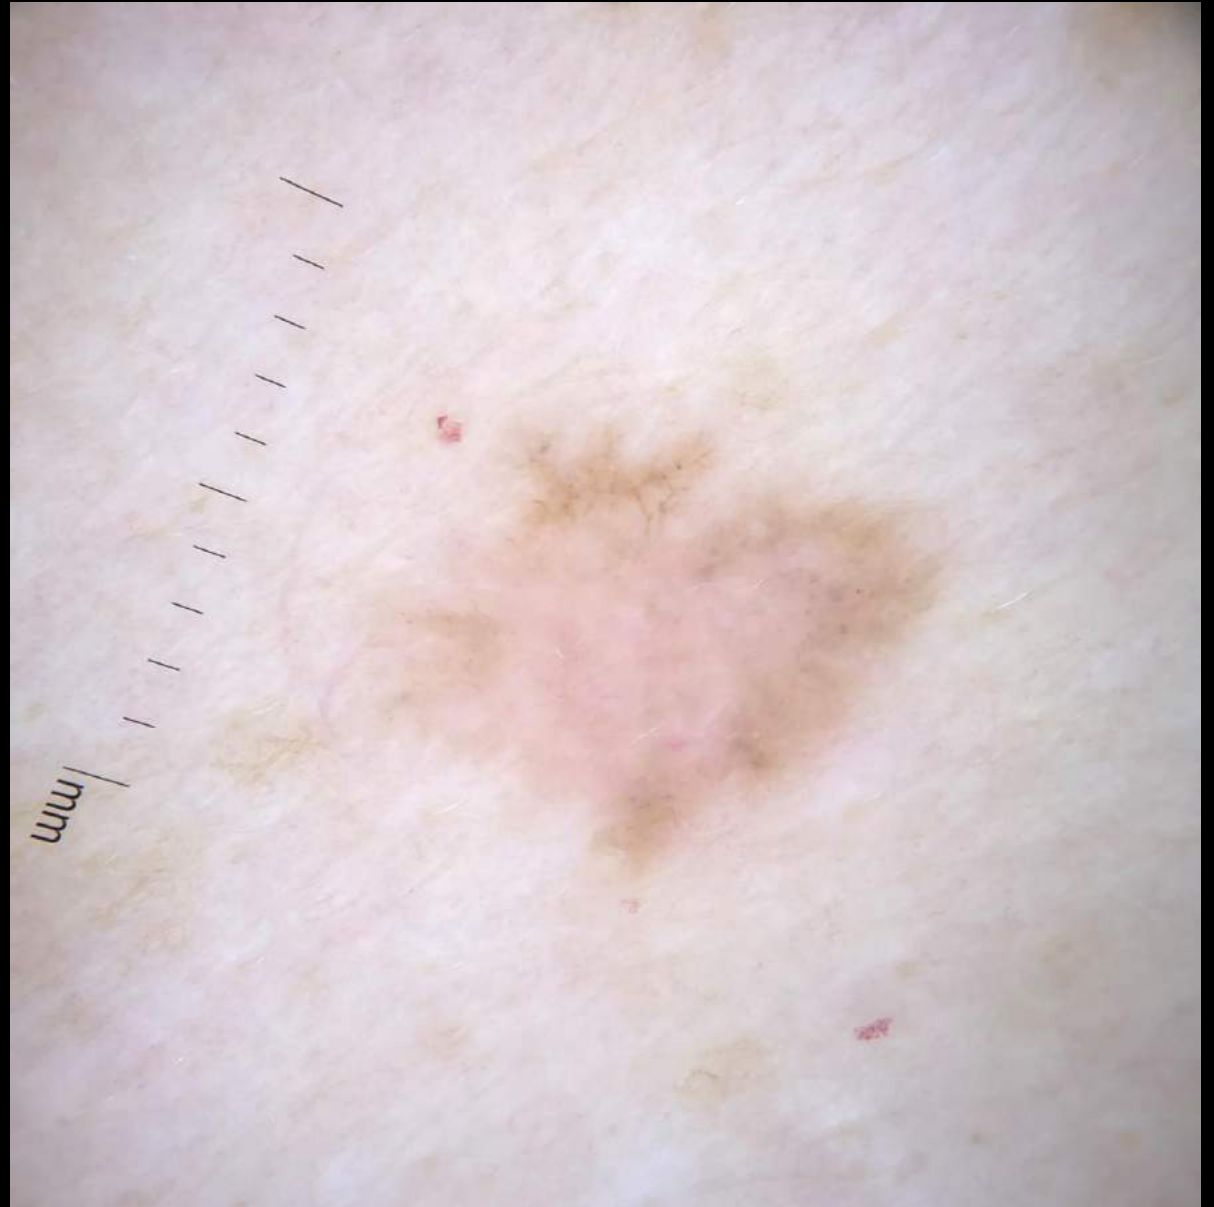

Case number 41



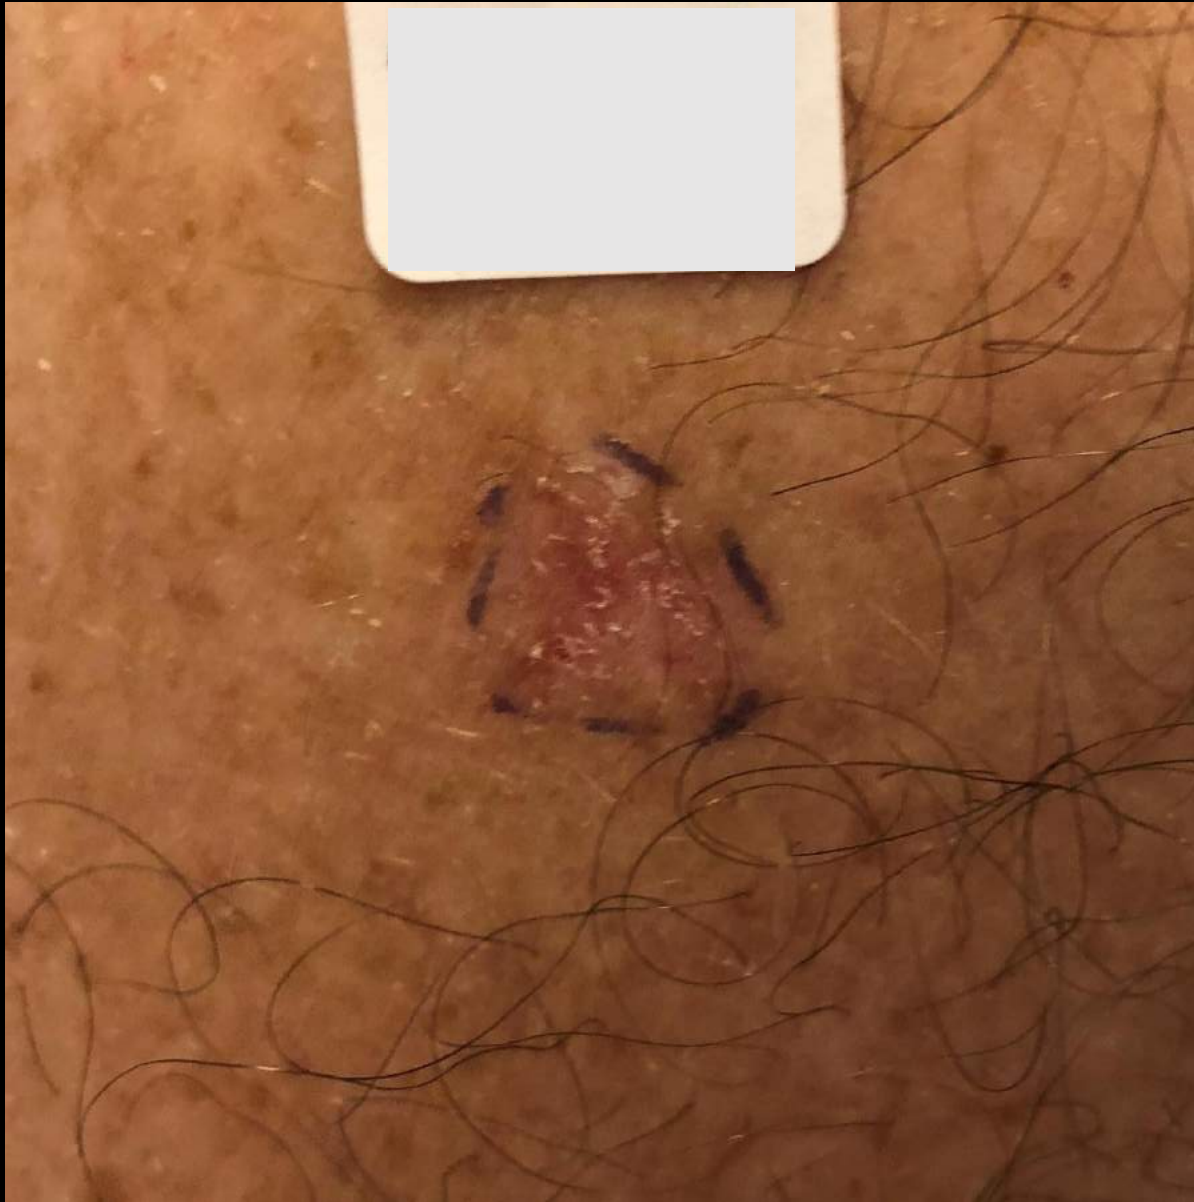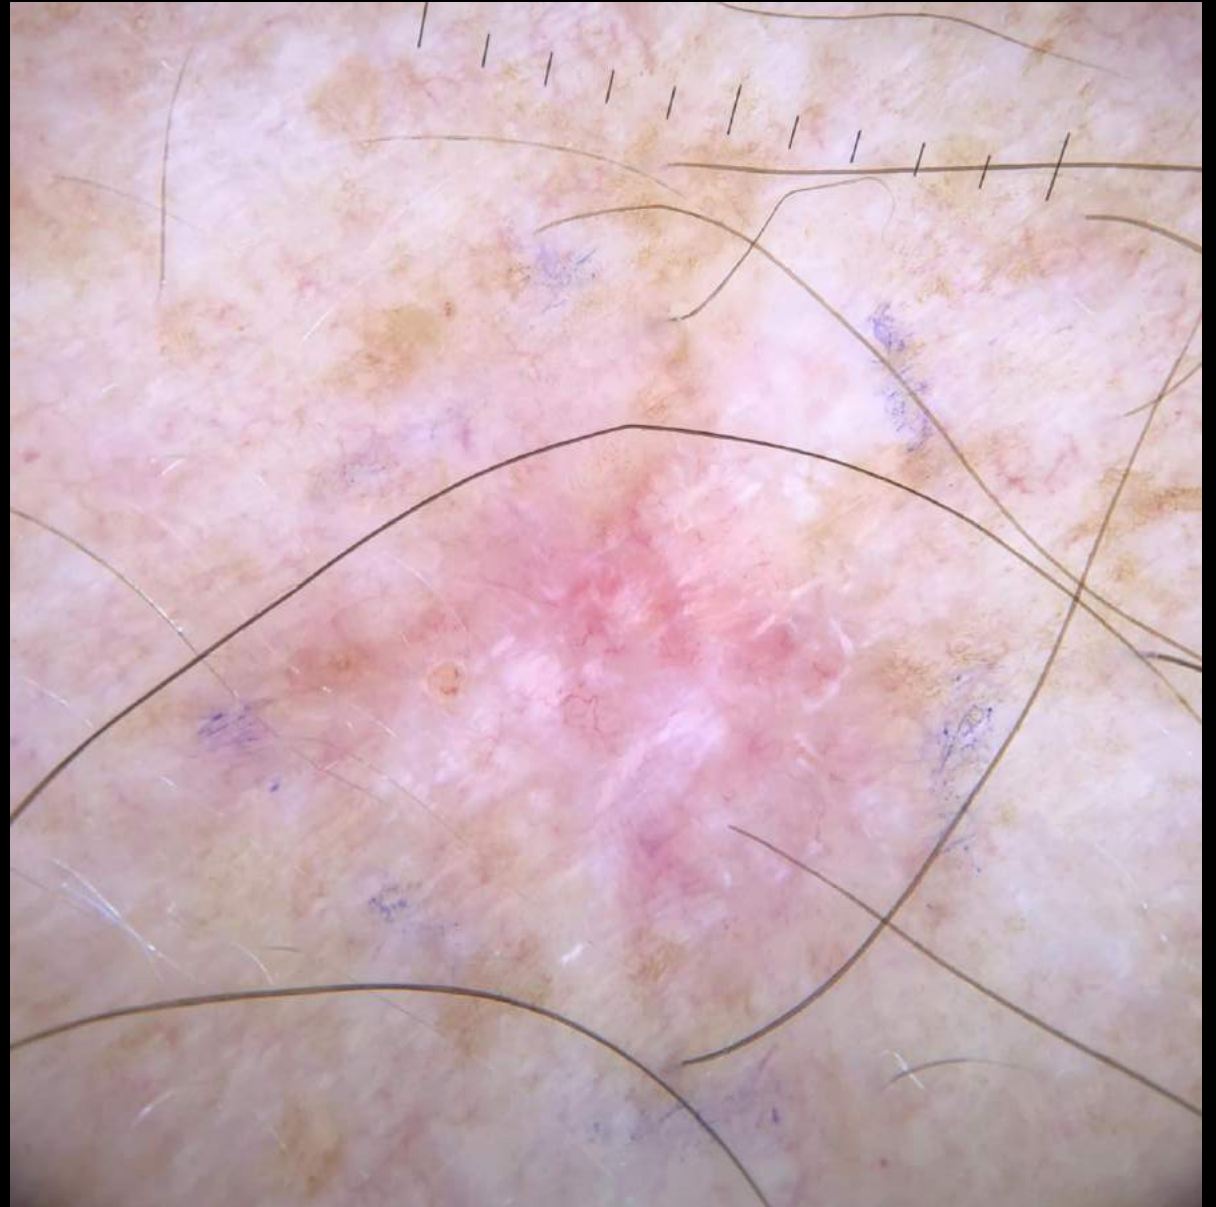

Case number 42



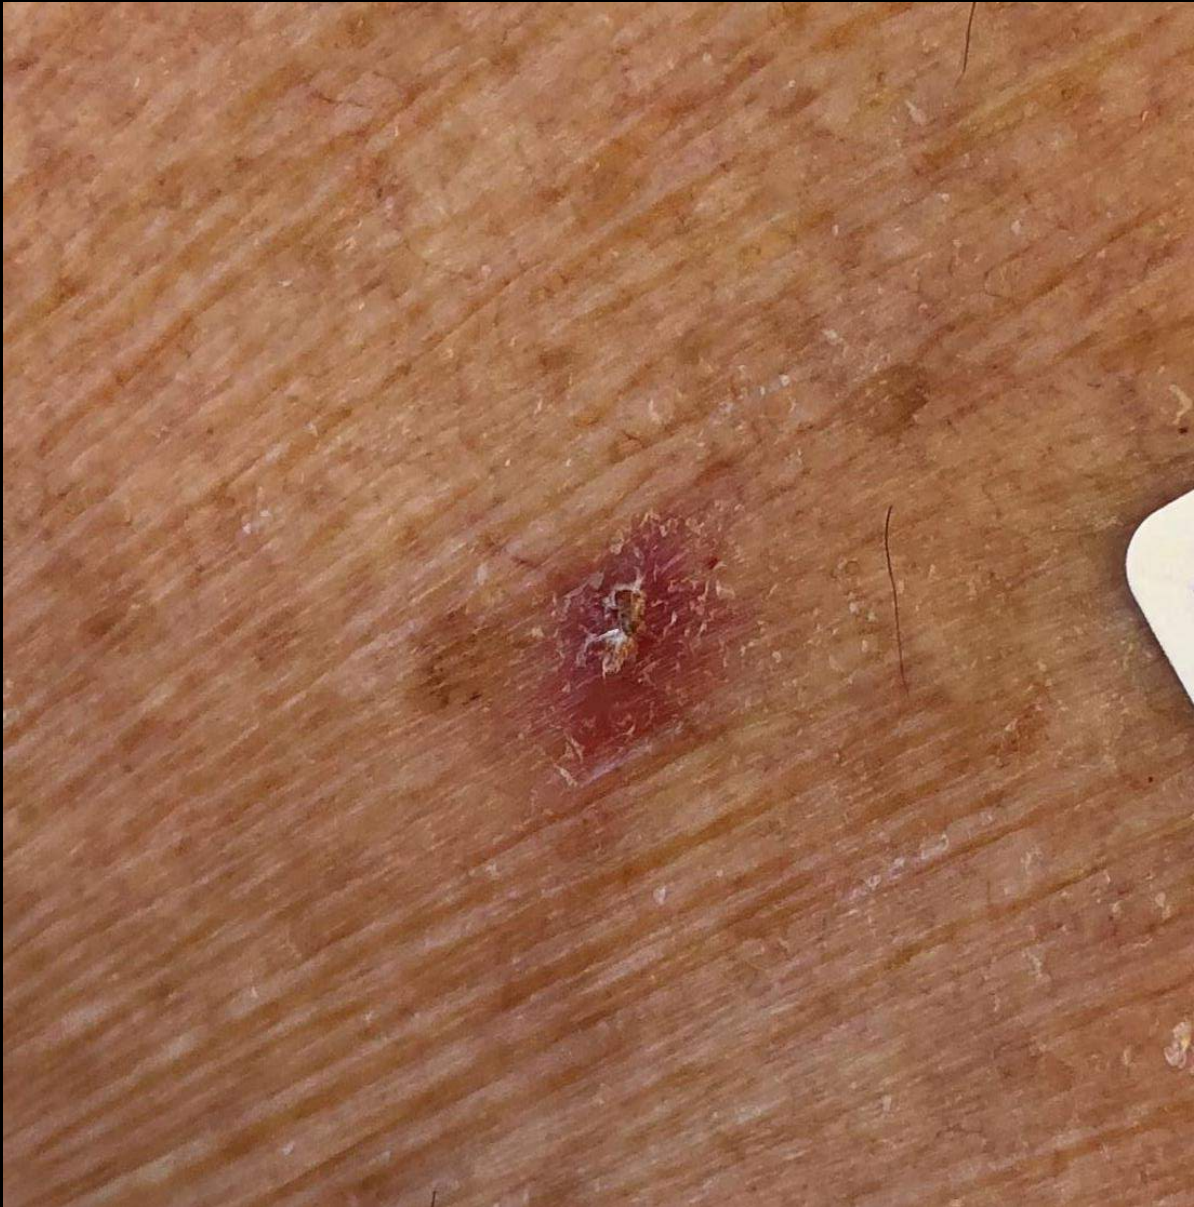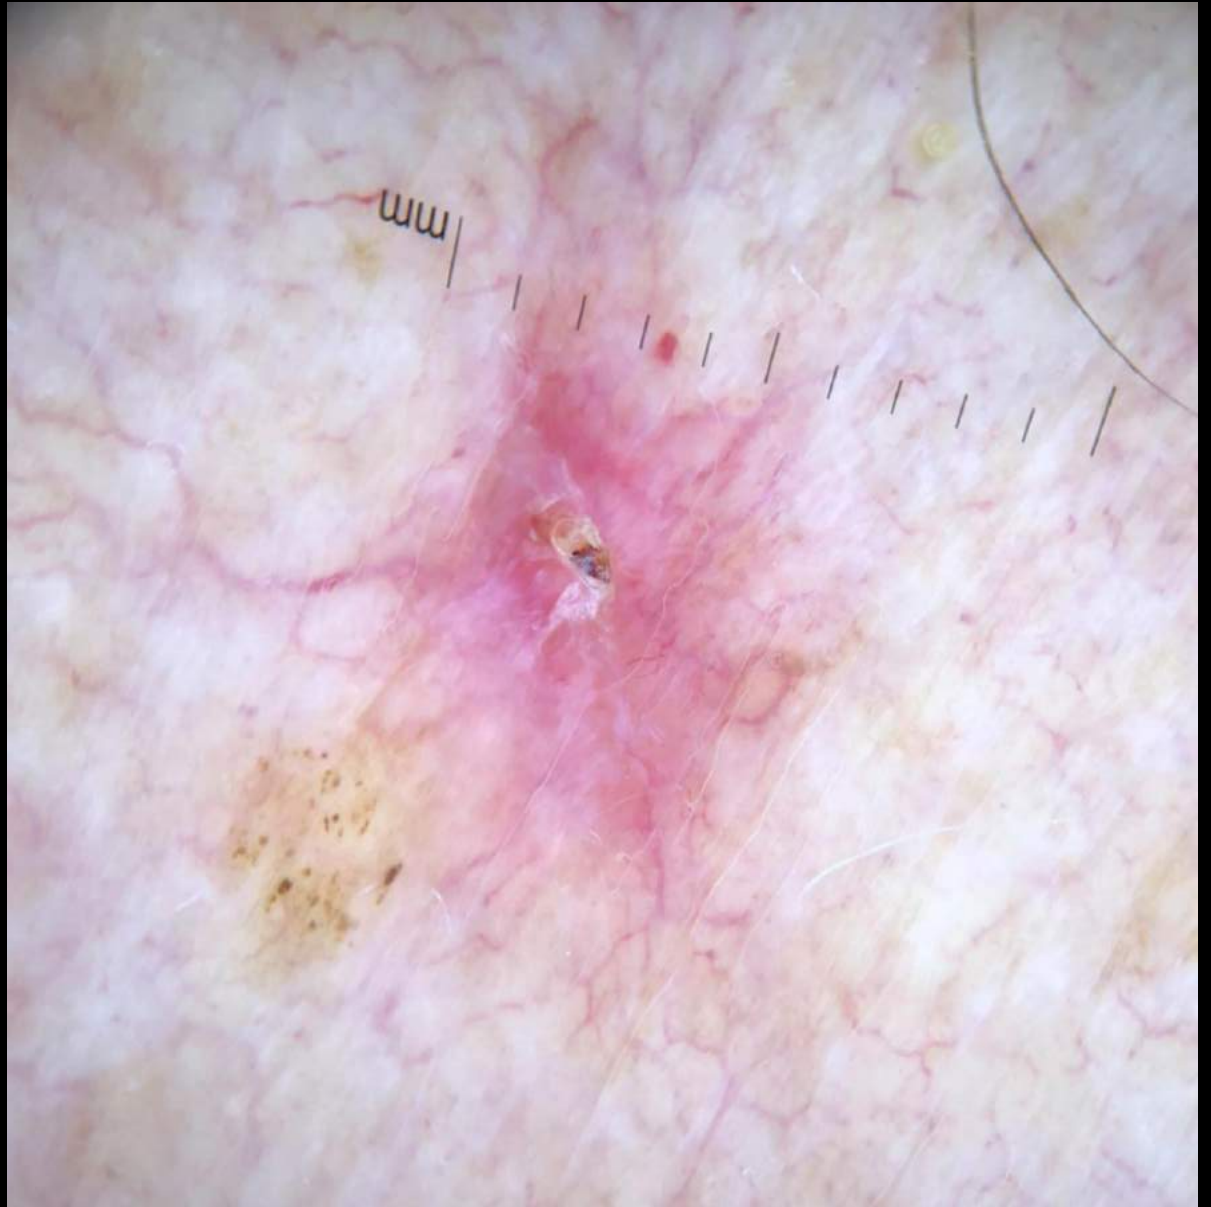

Case number 43



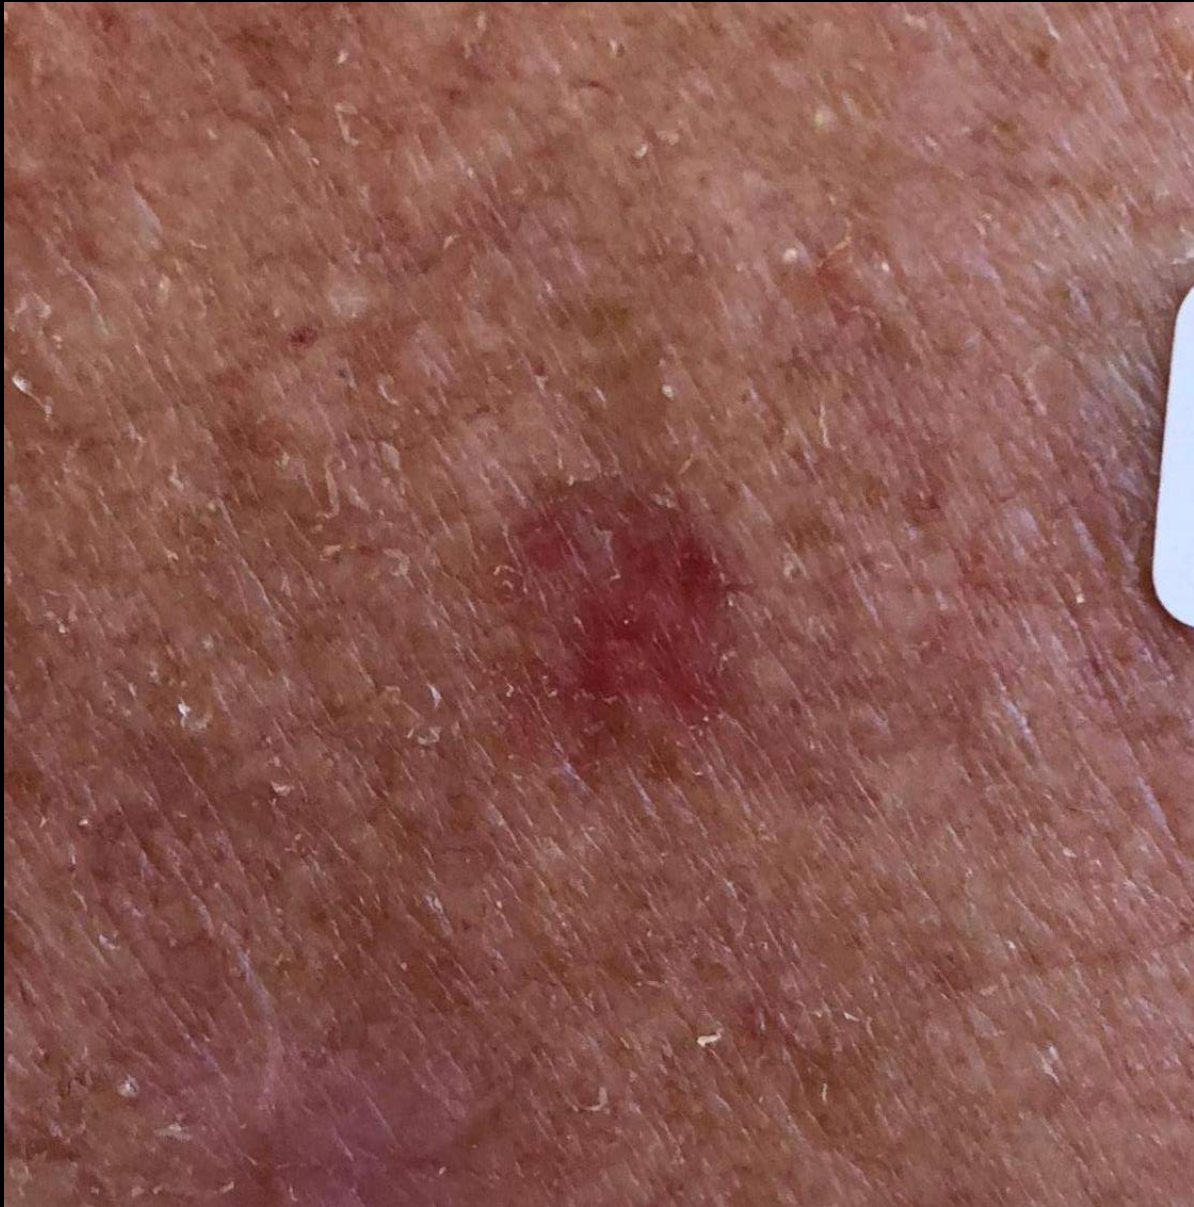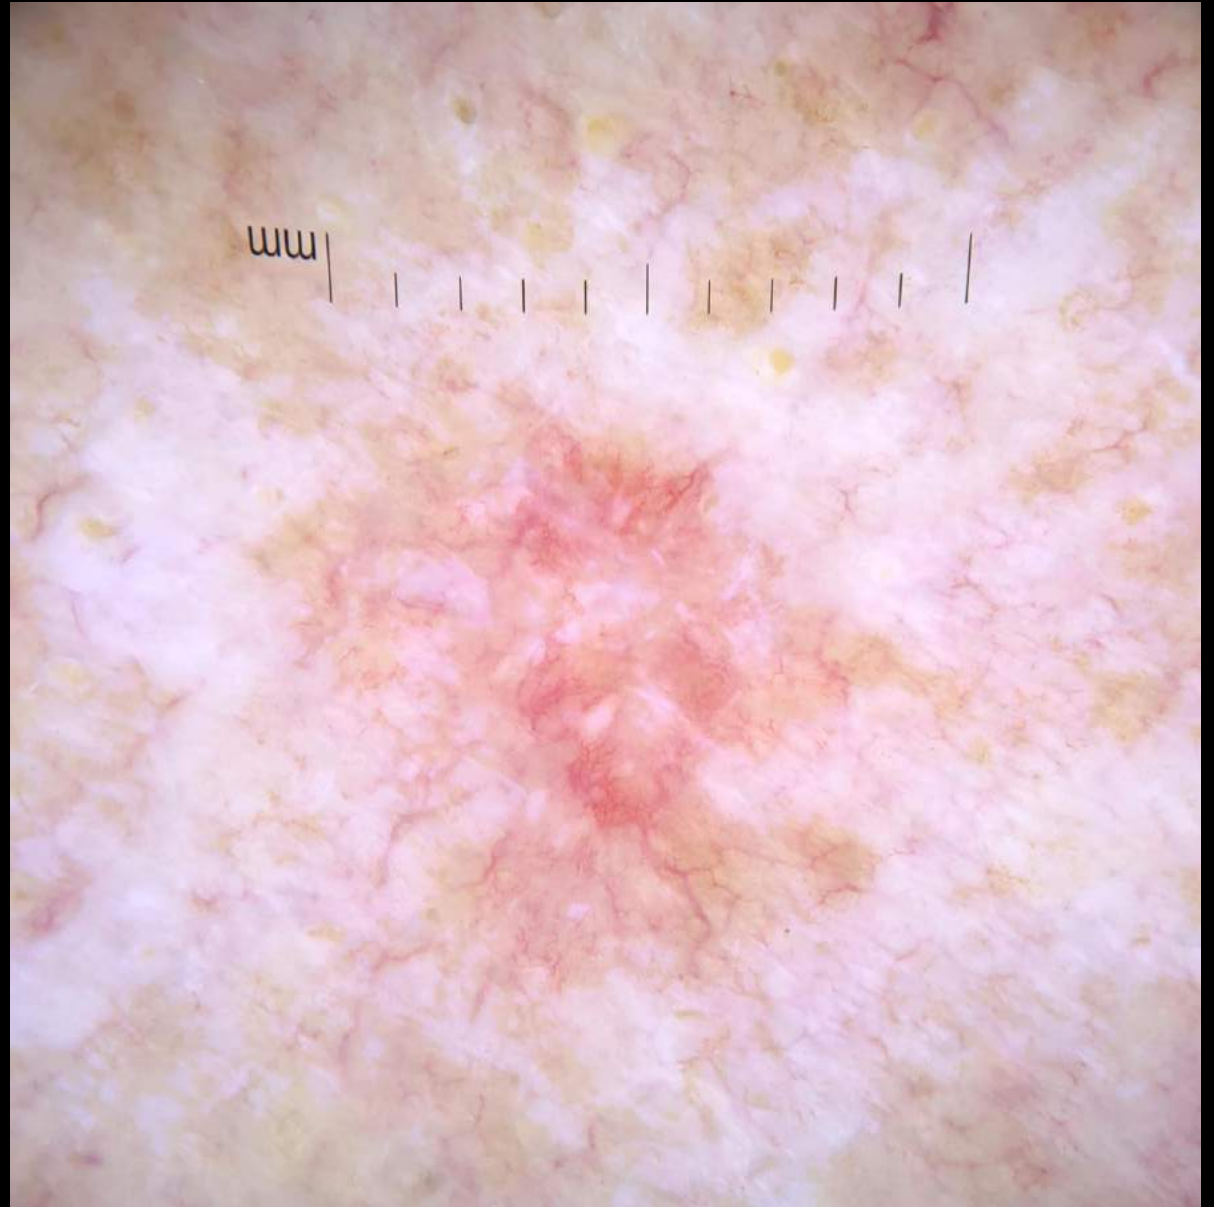

Case number 44



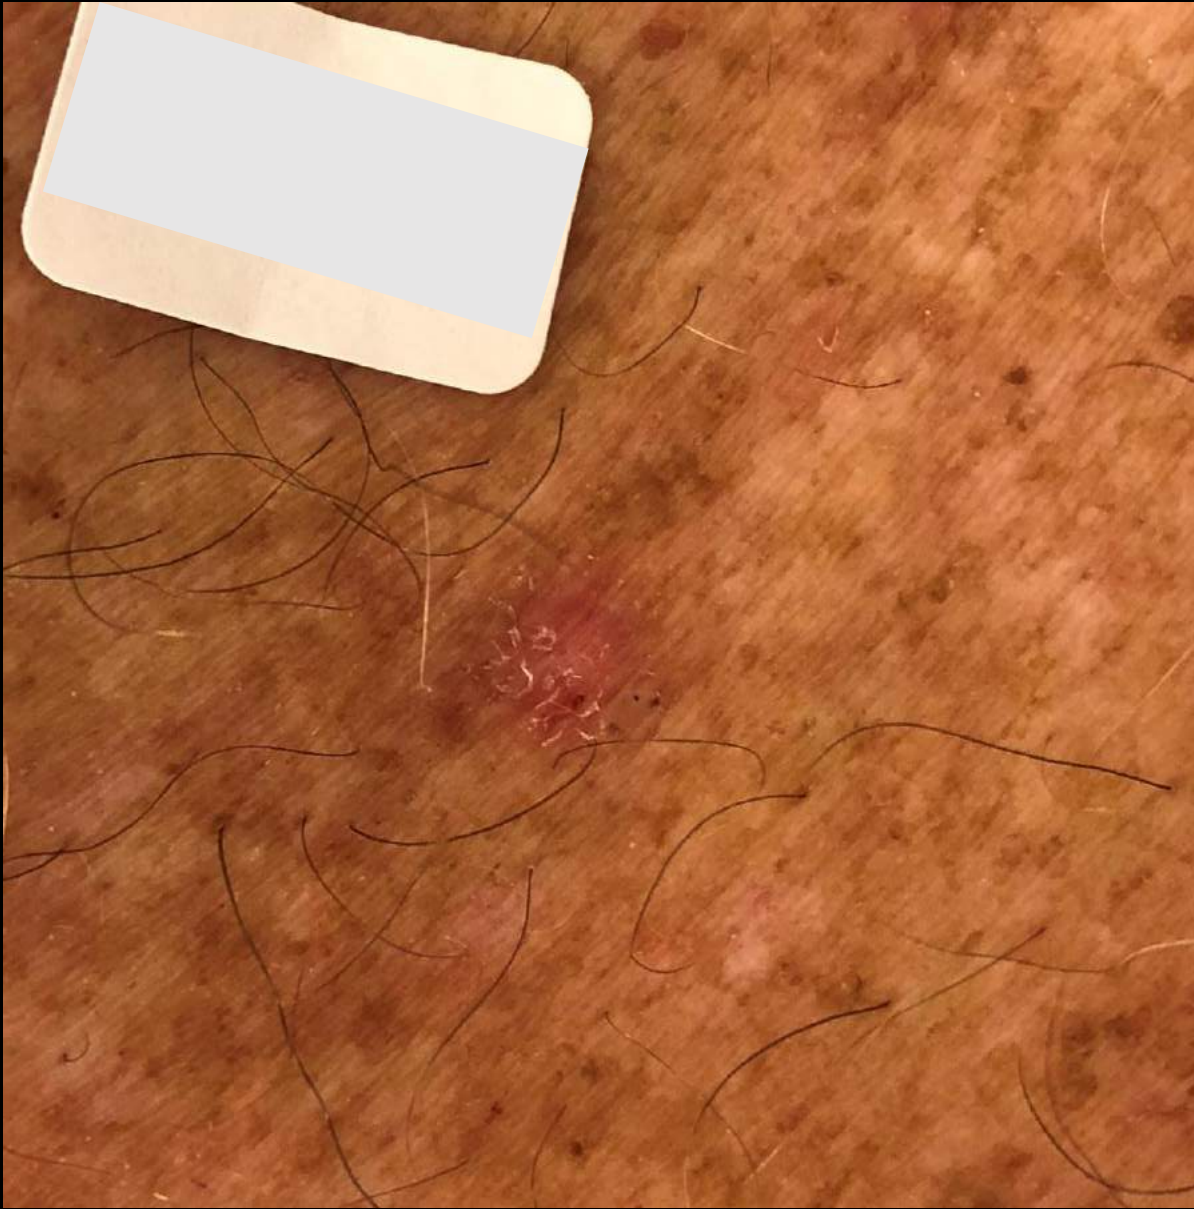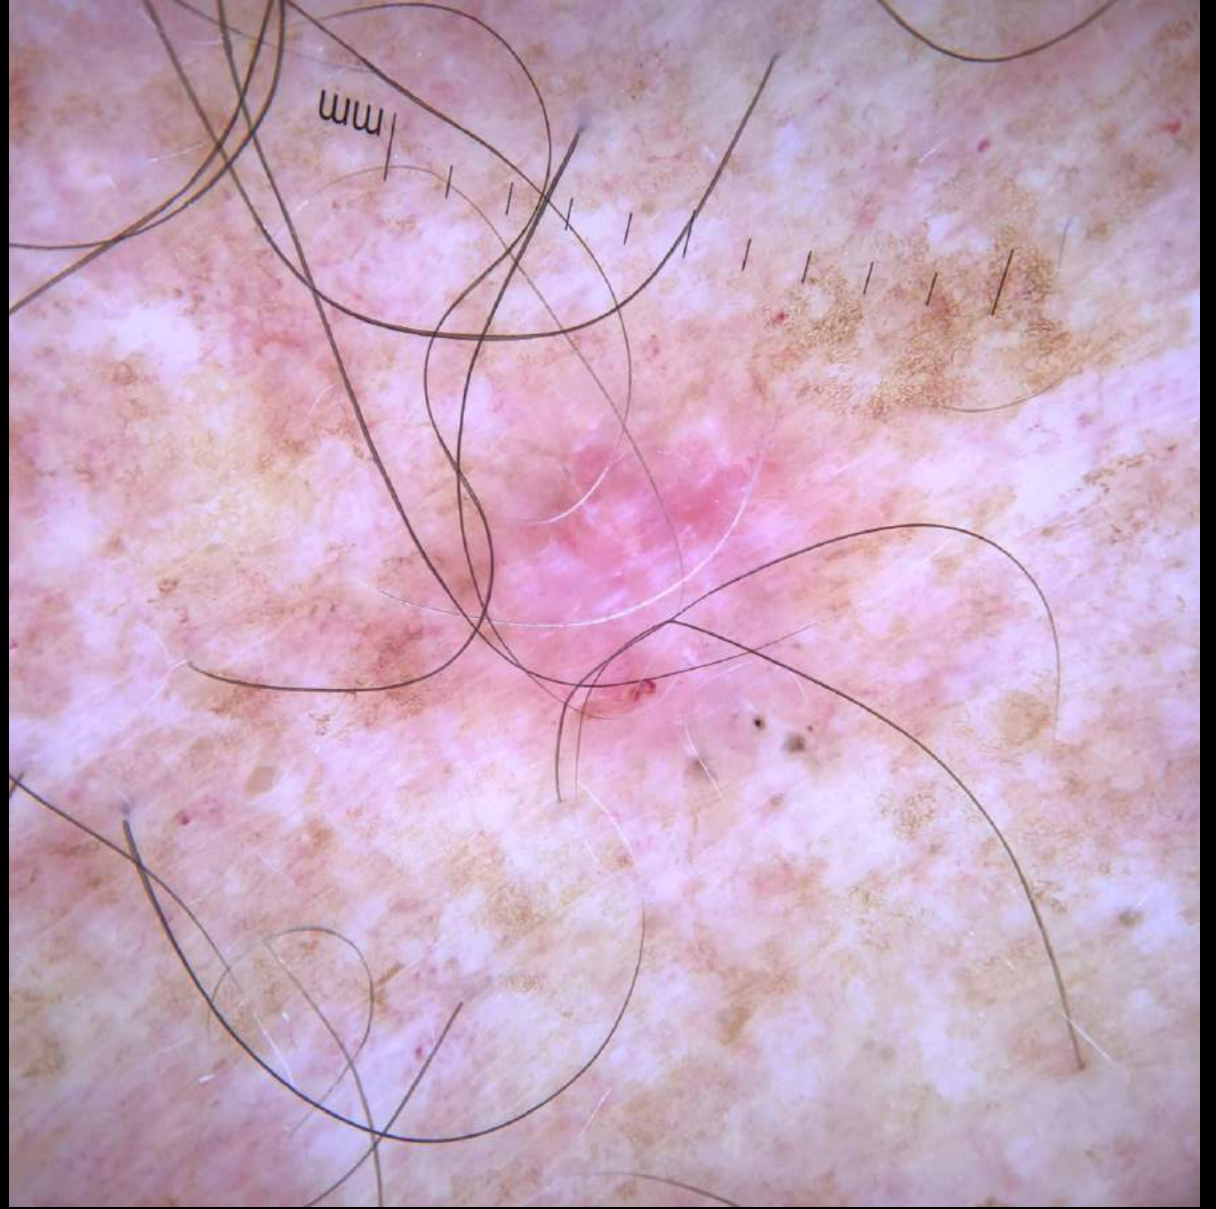

Case number 45



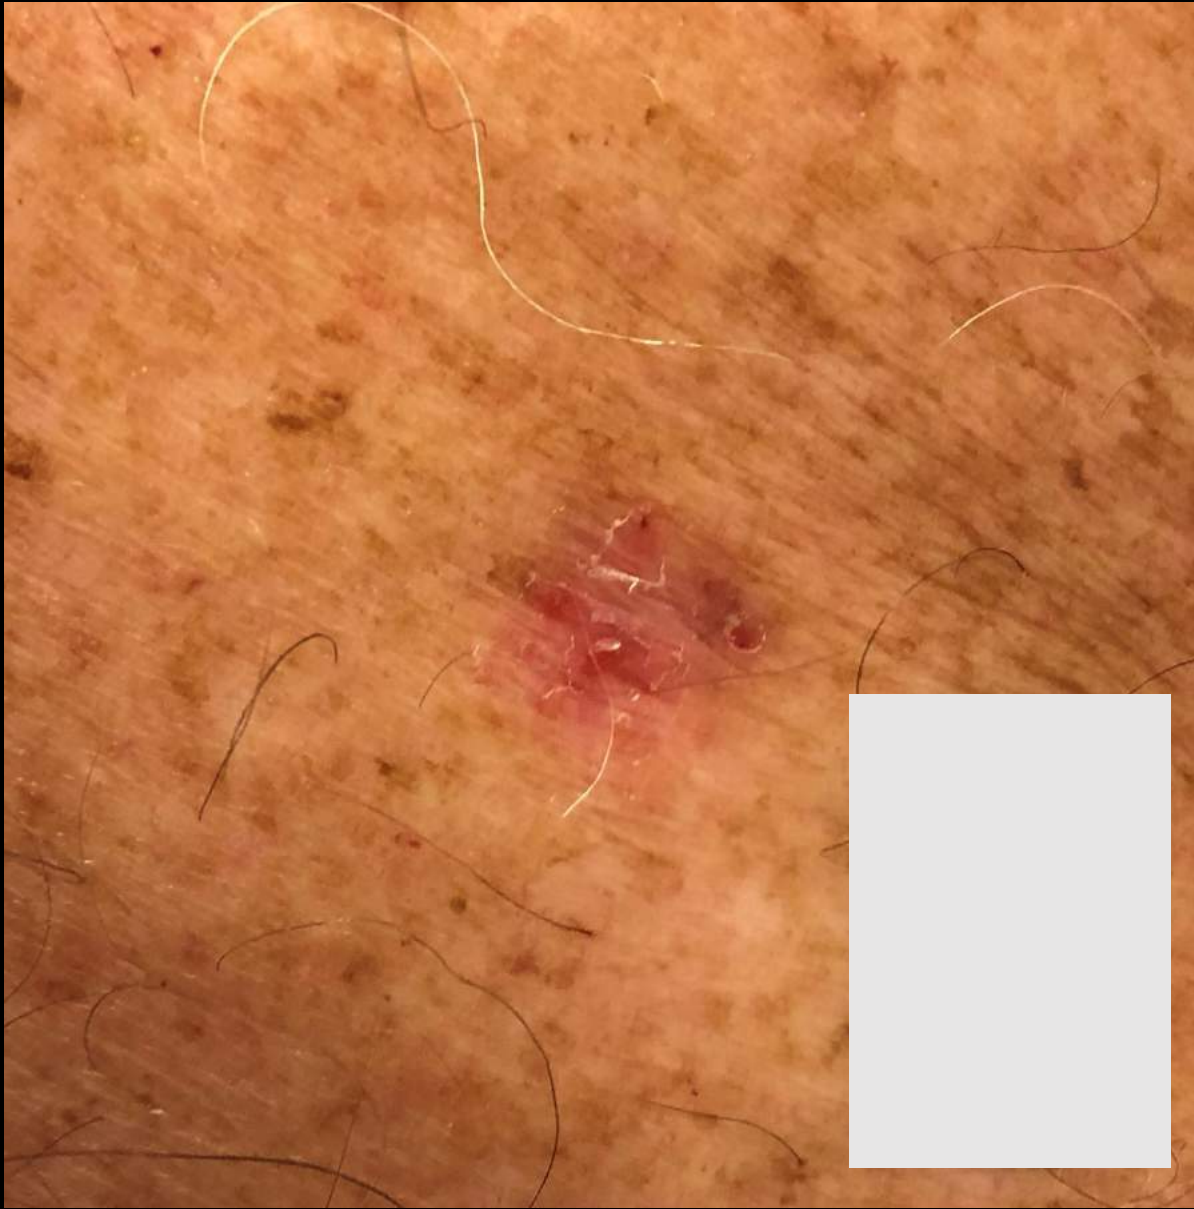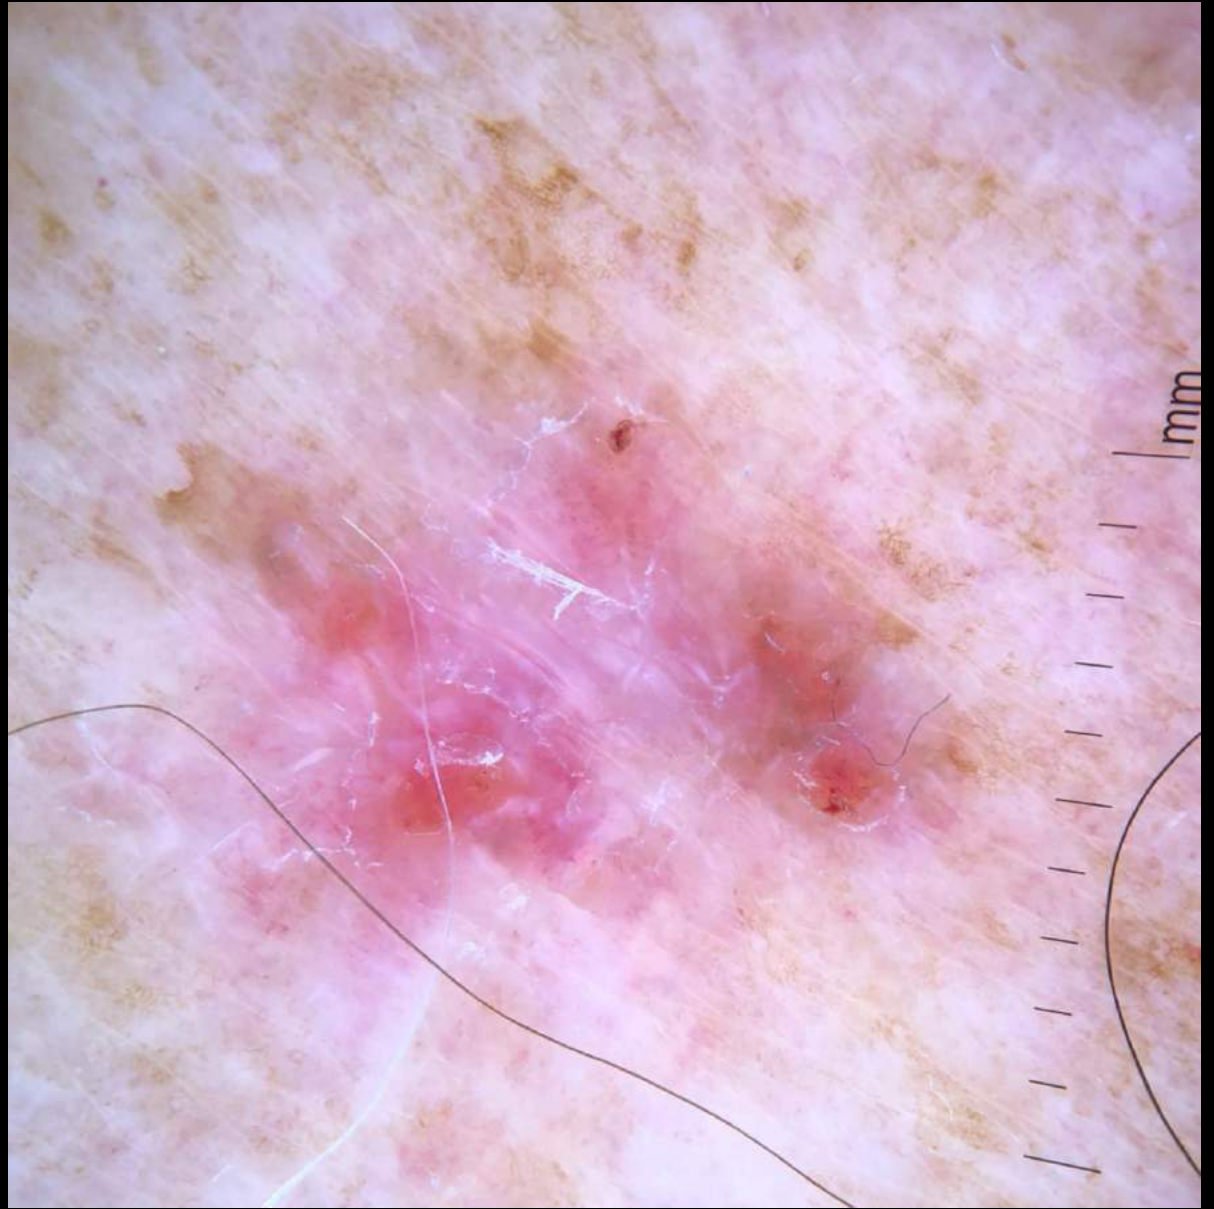

Case number 46



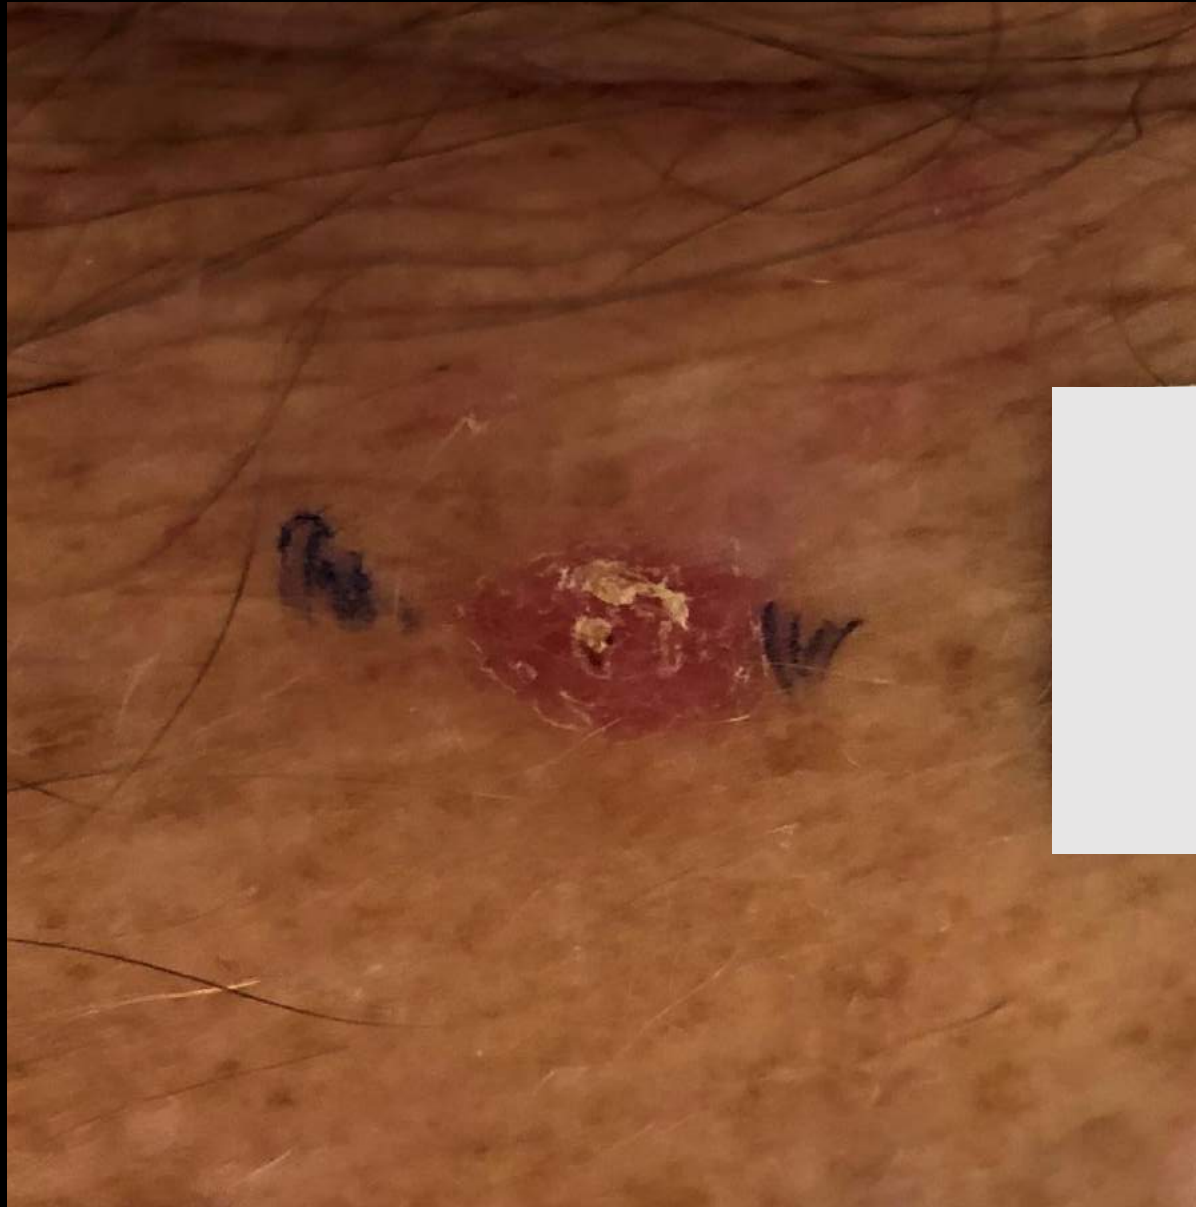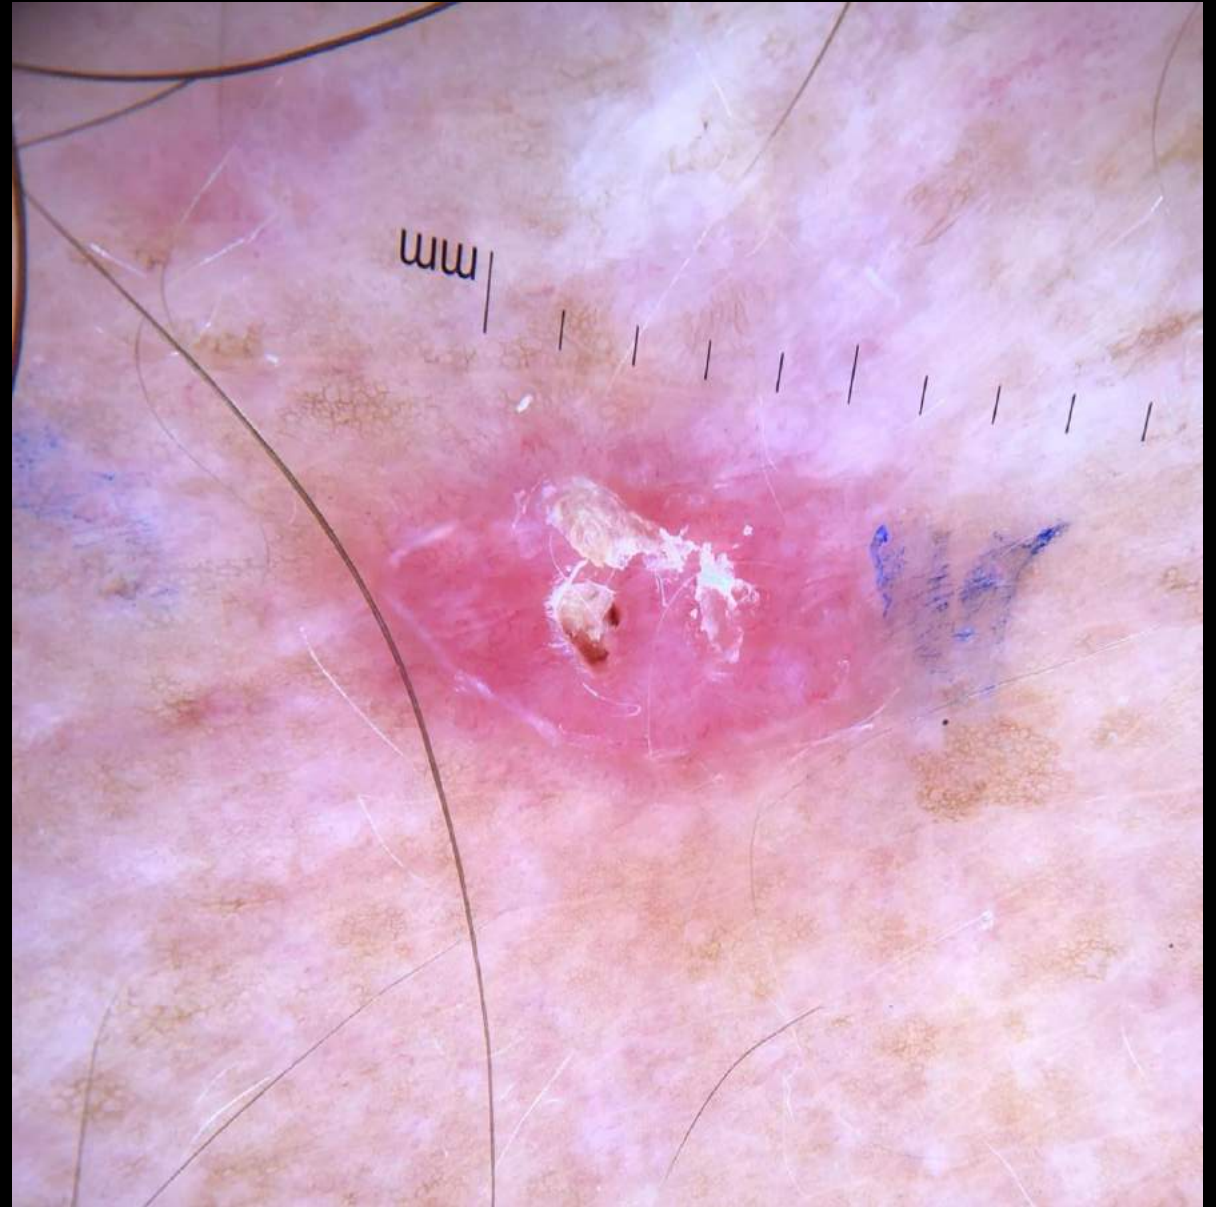

Case number 47



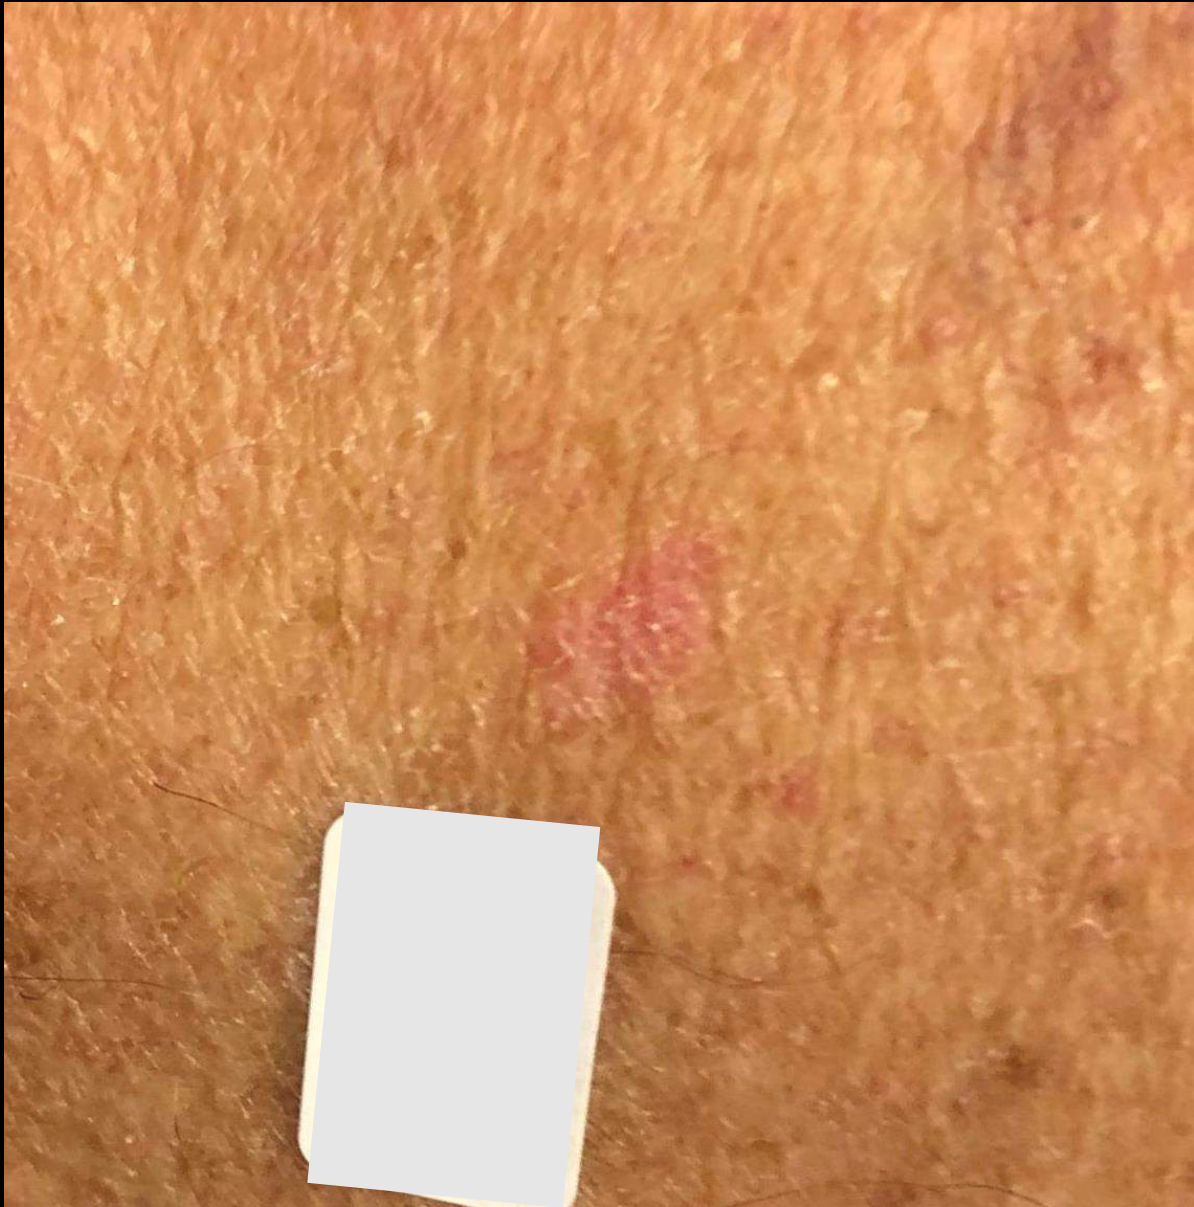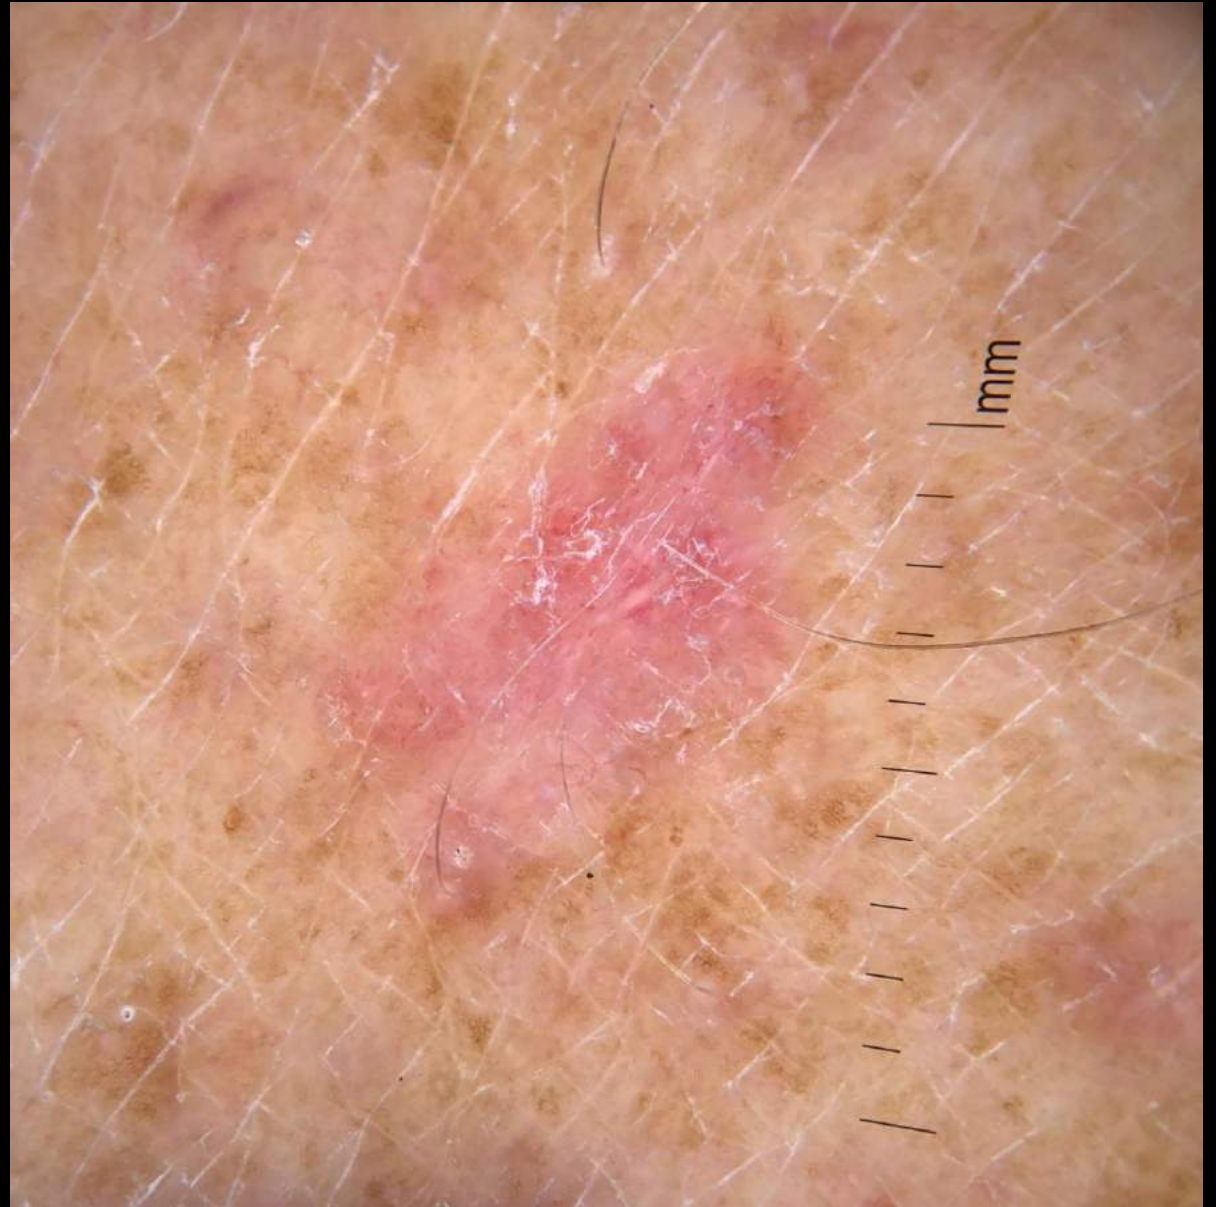

Case number 48



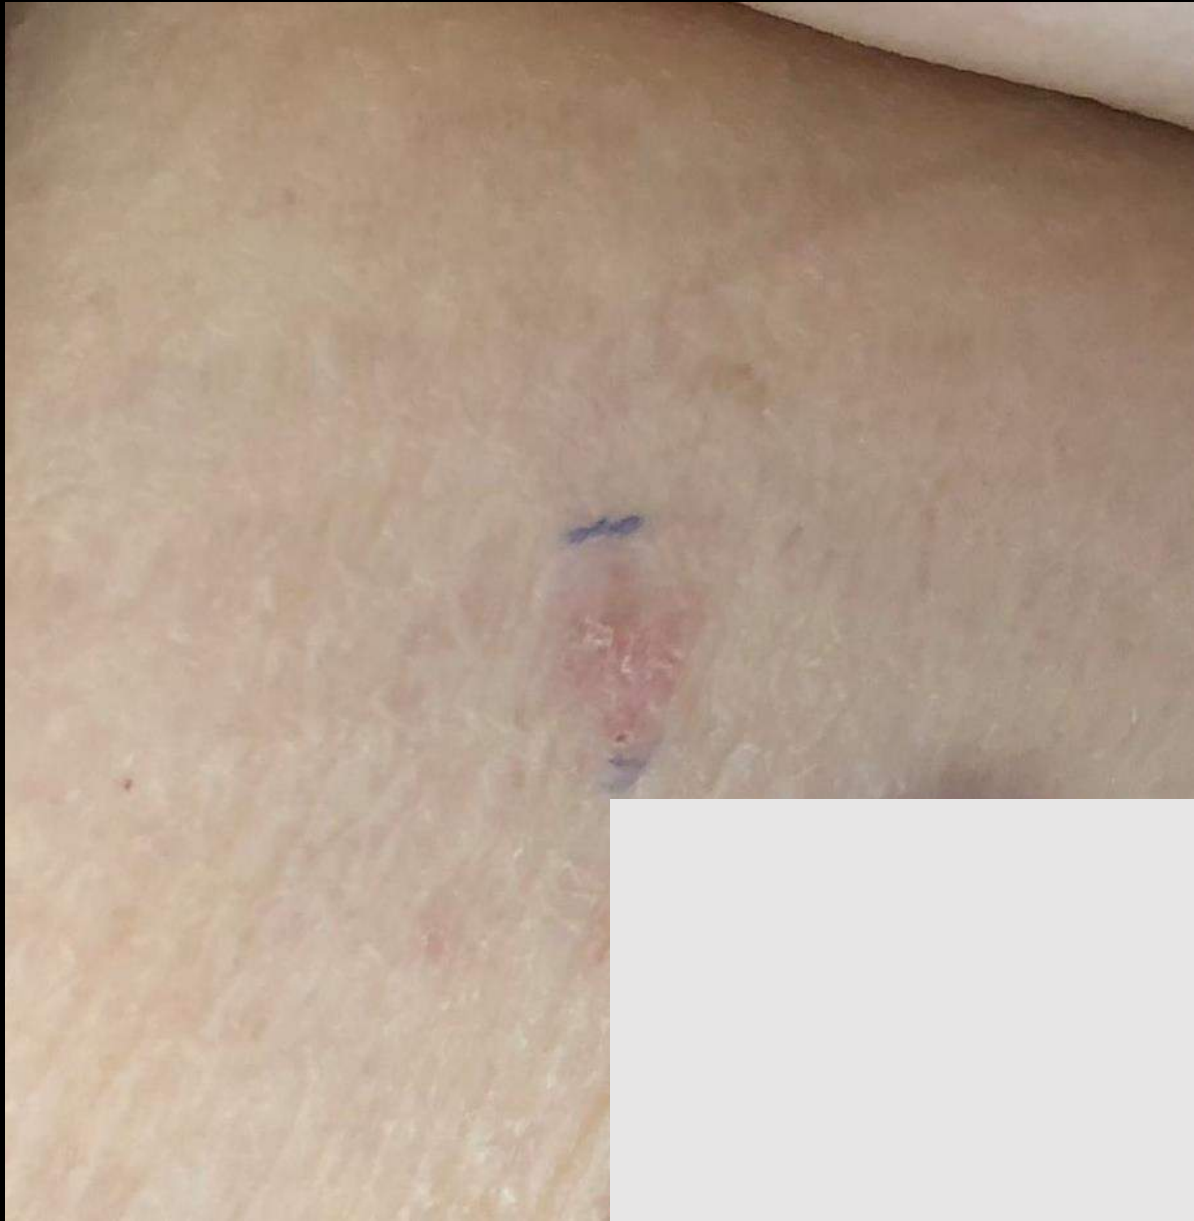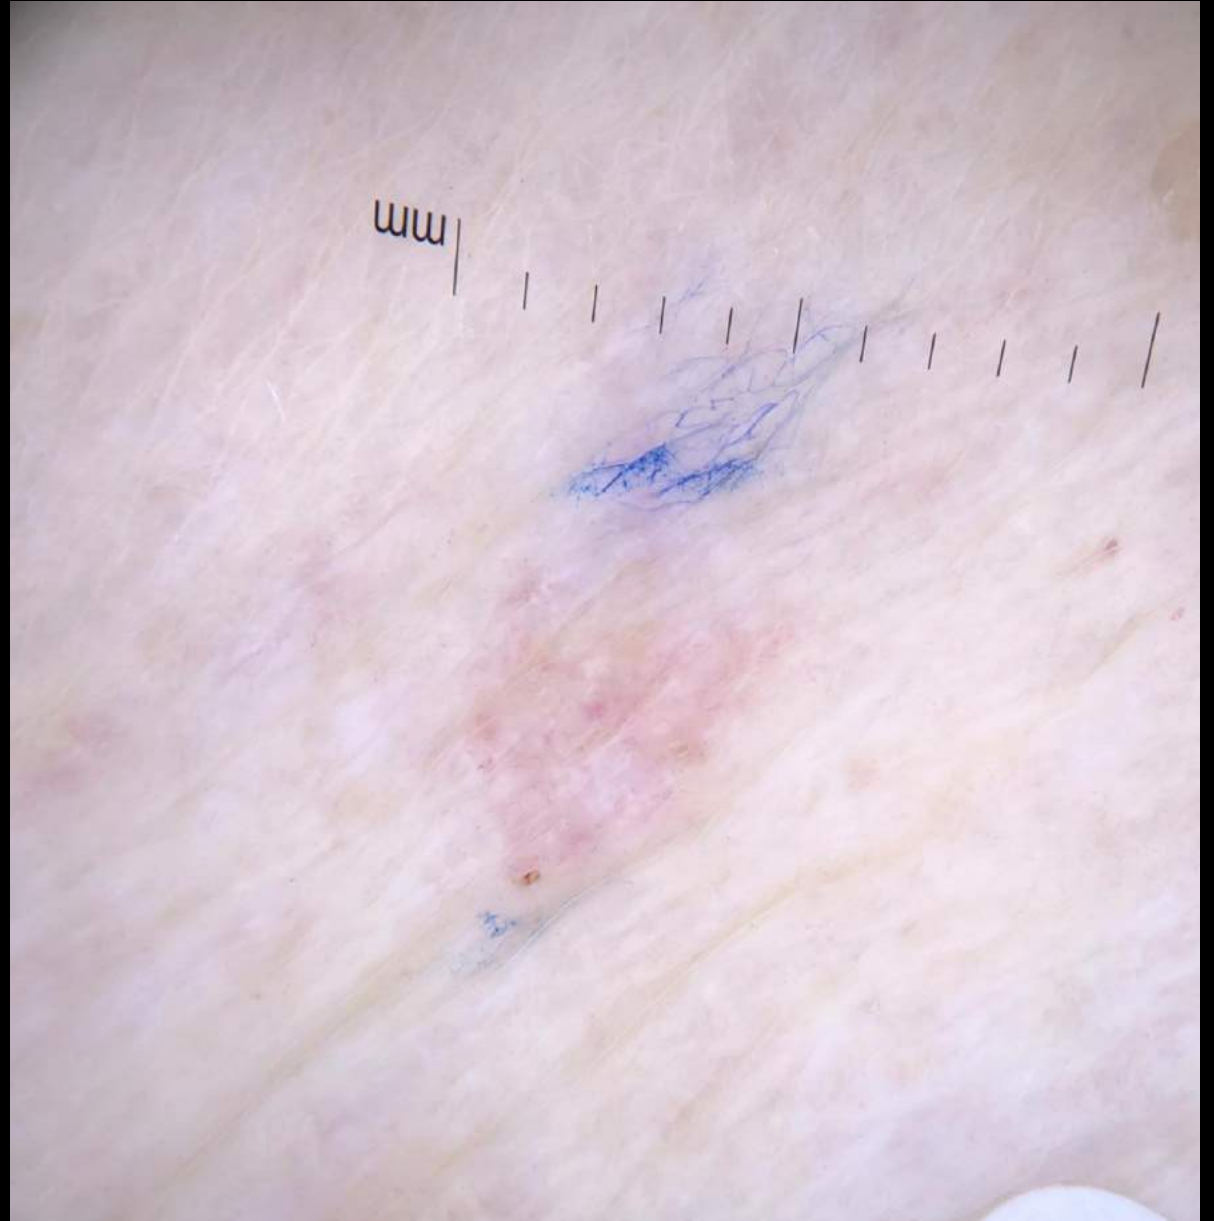

Case number 49



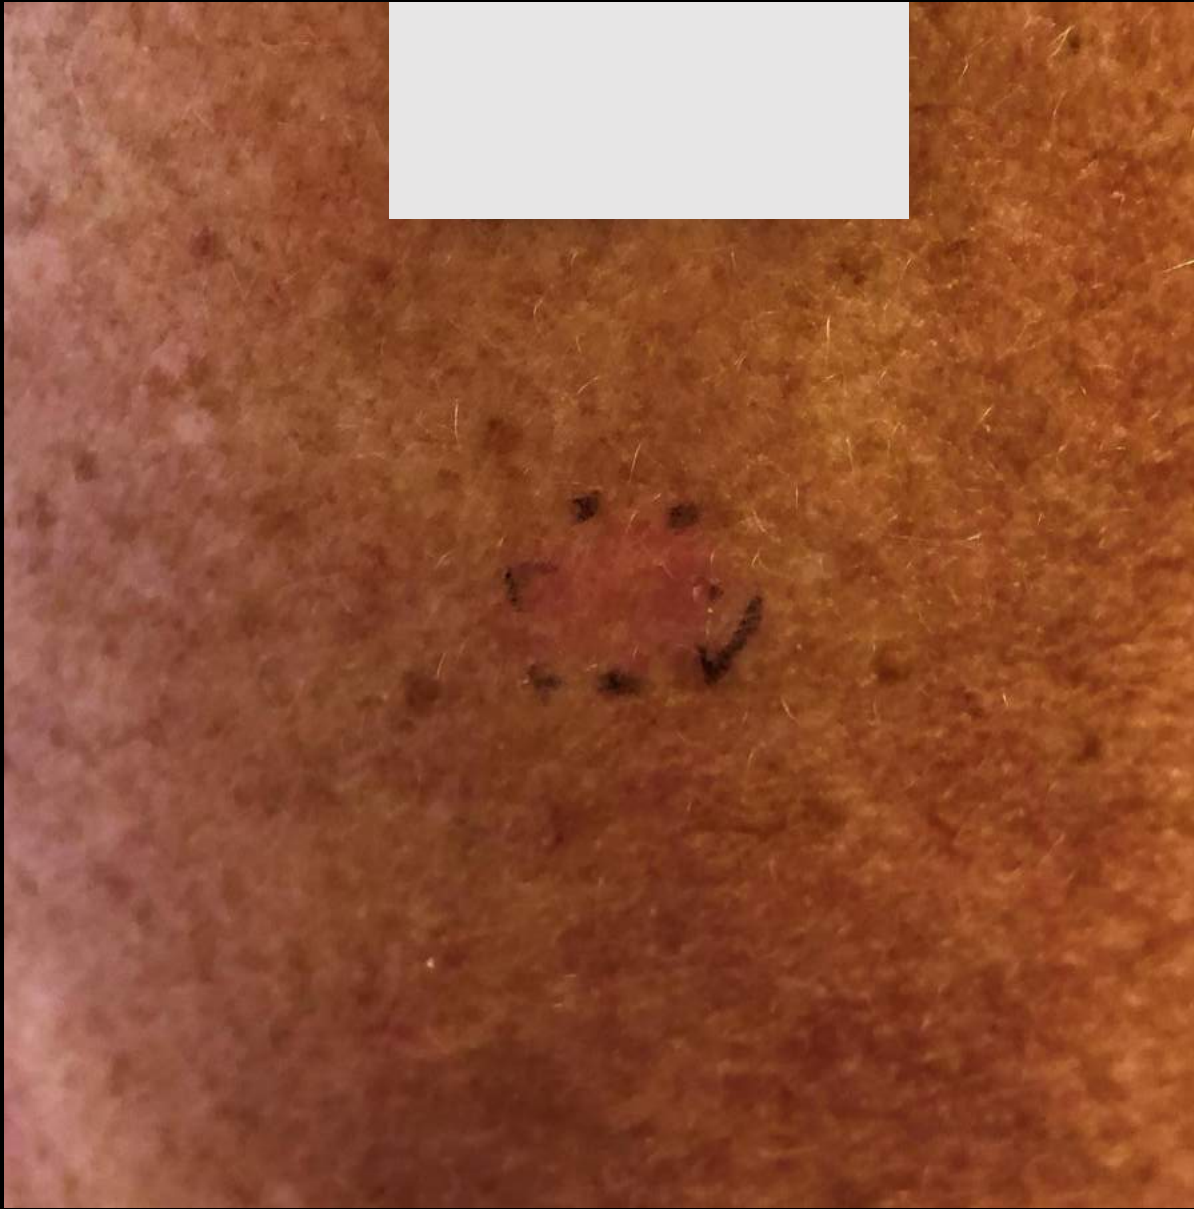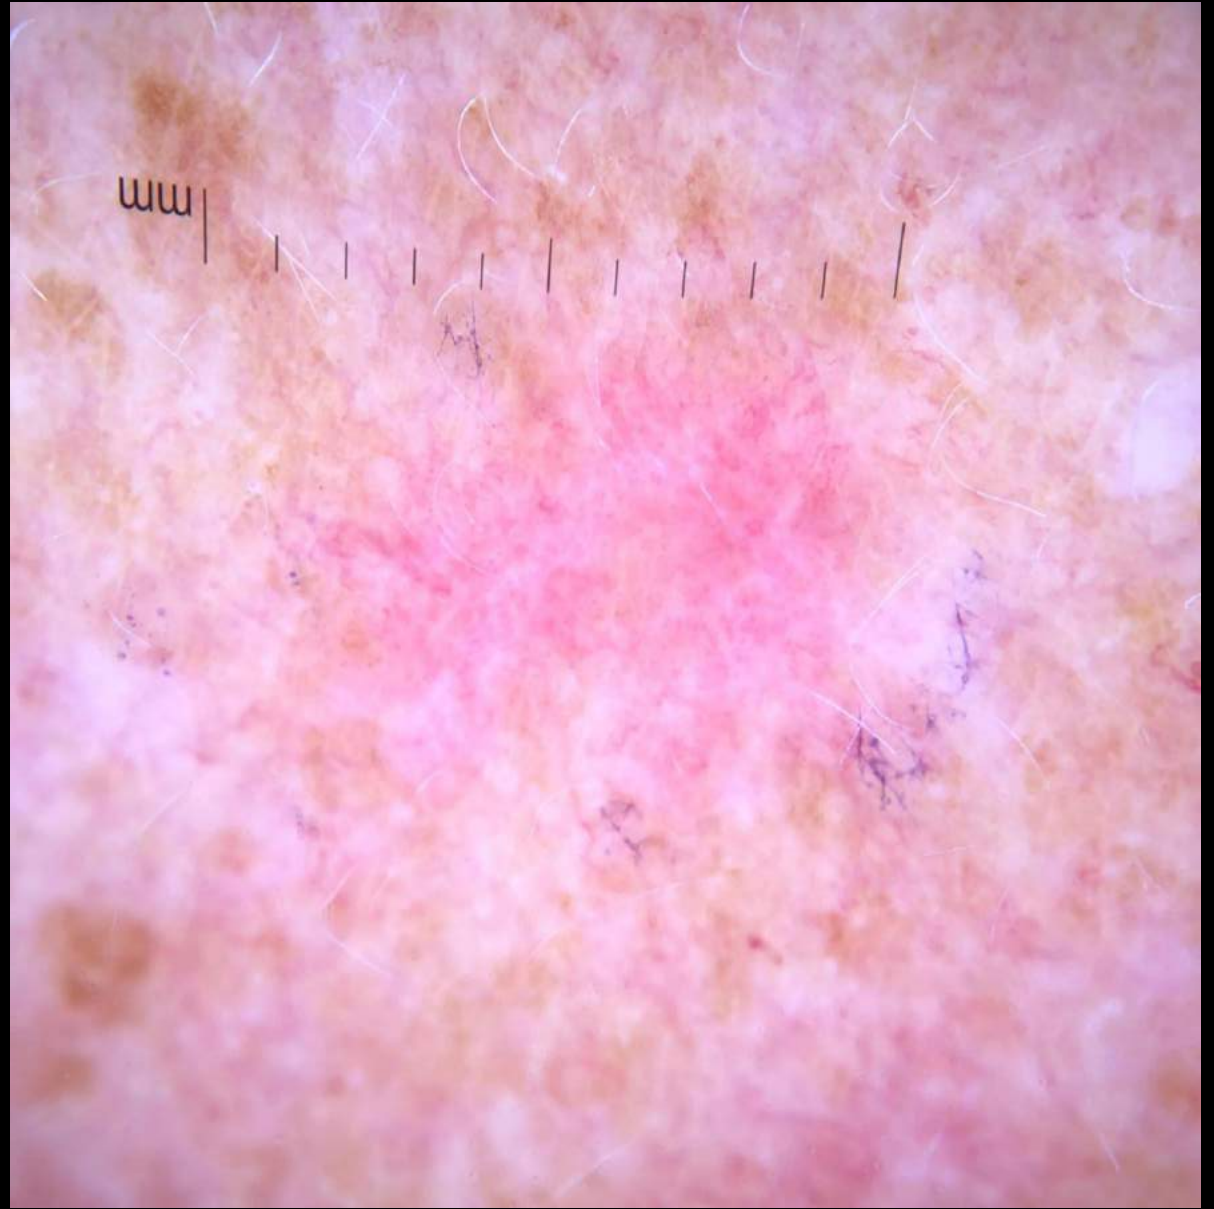

Case number 50



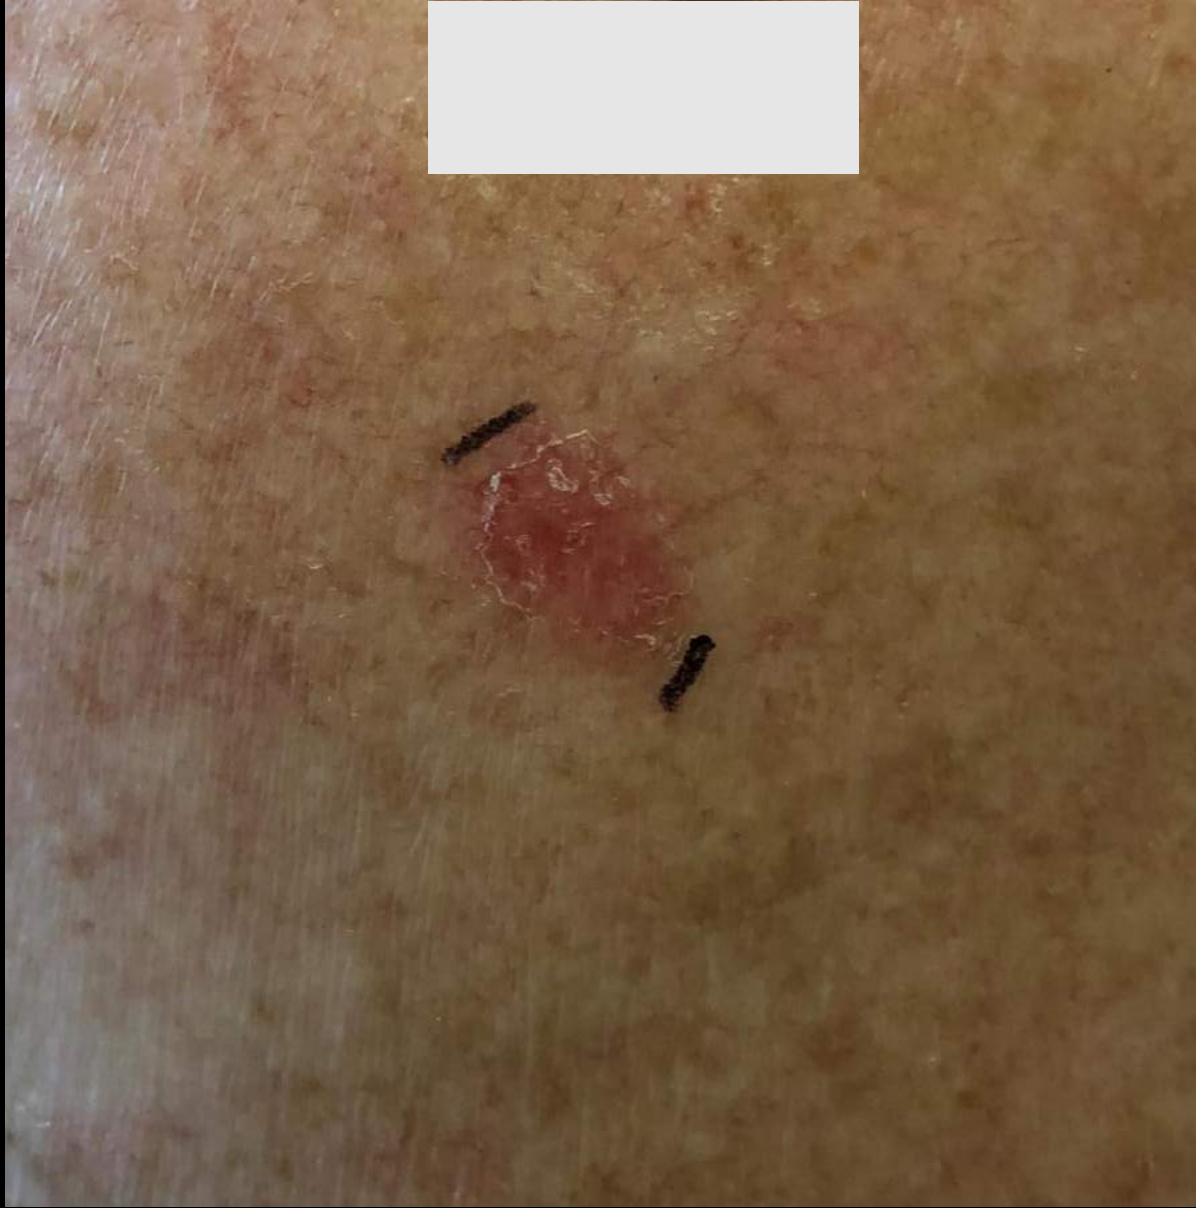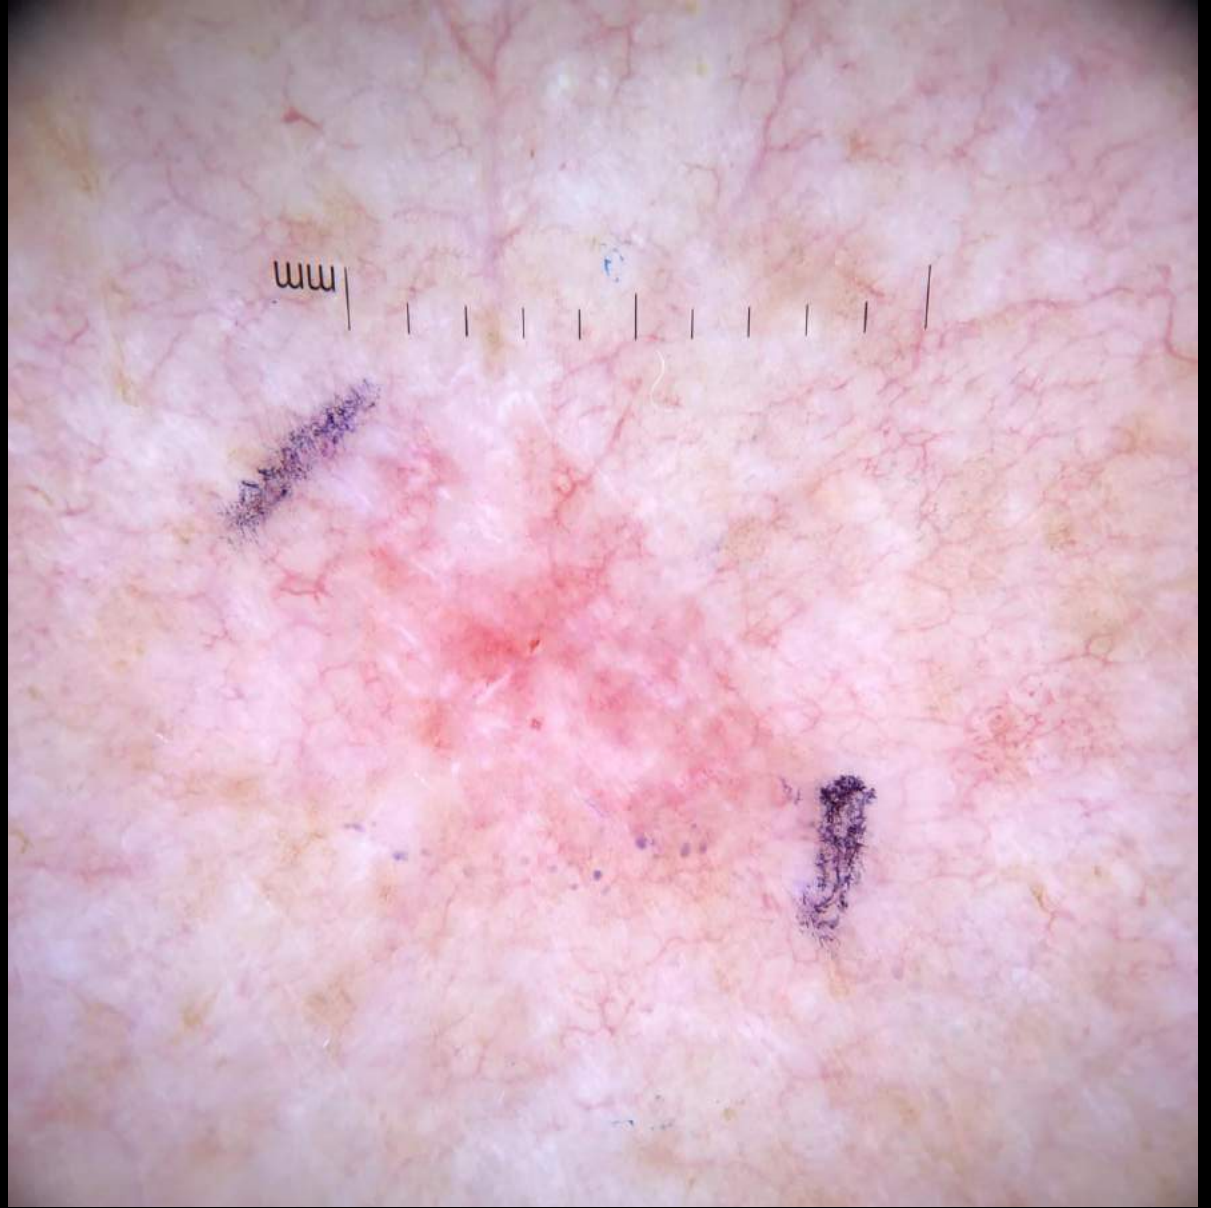

Case number 51



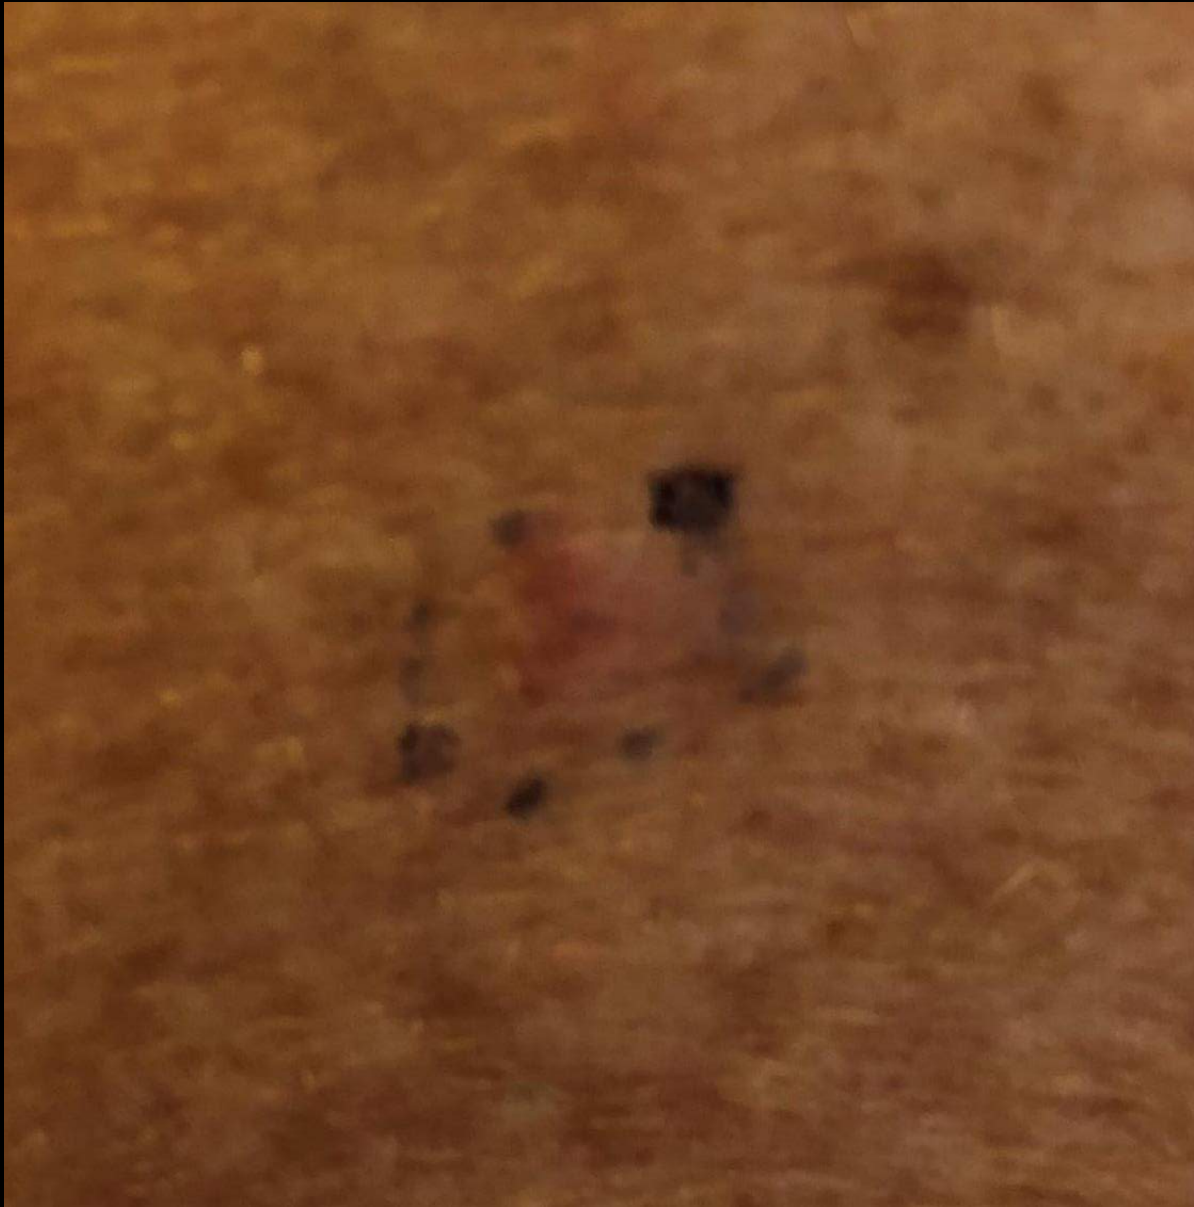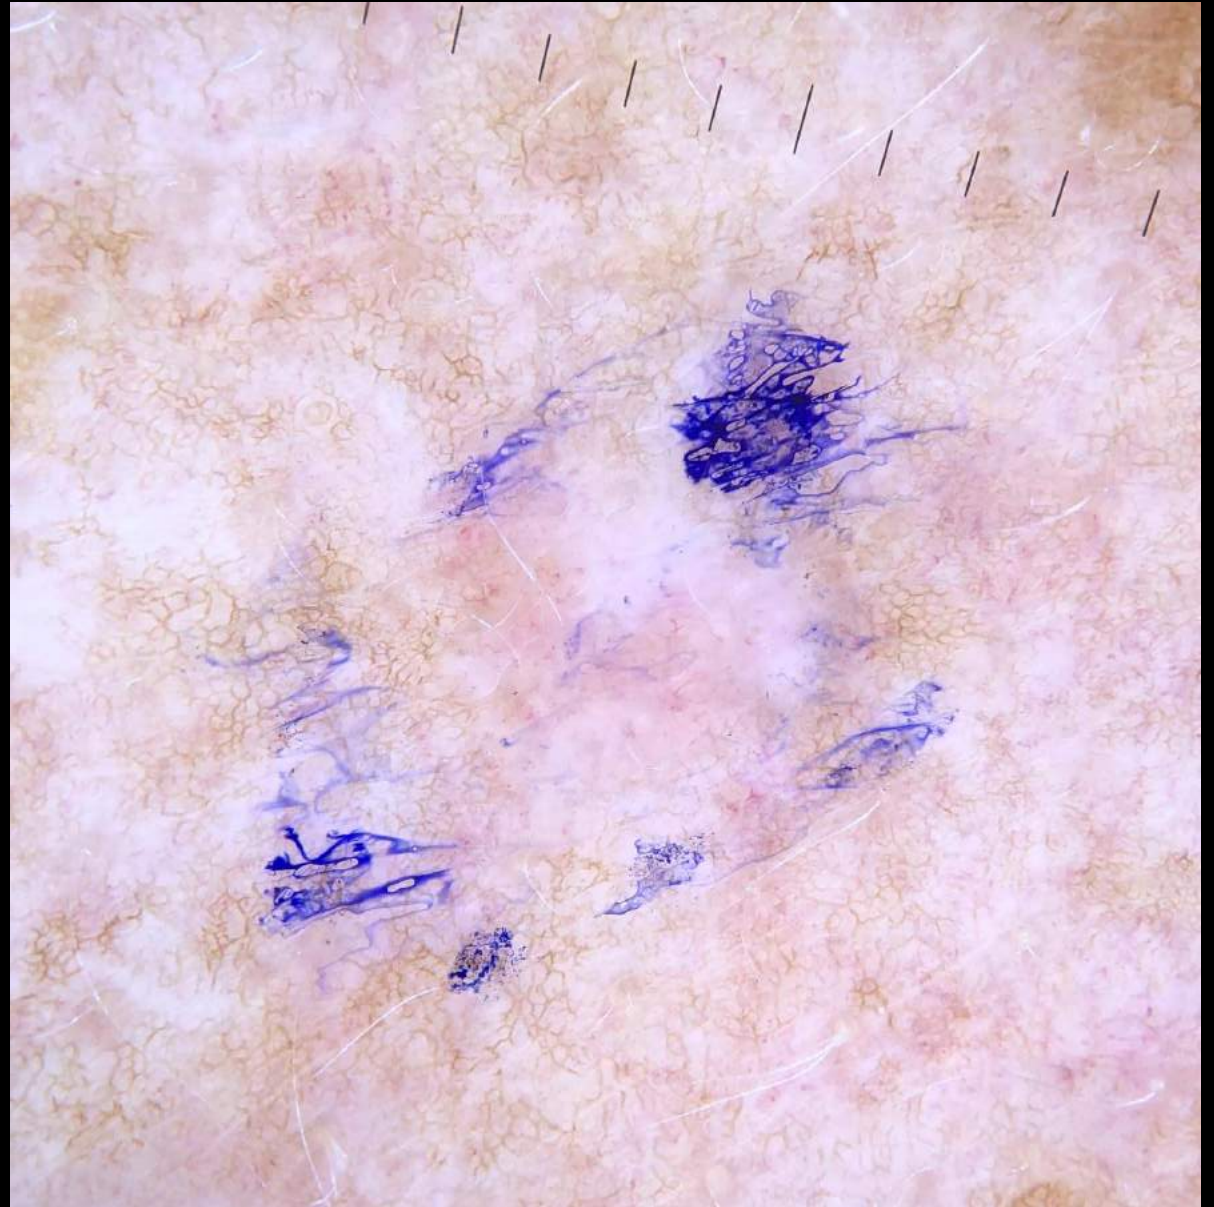

Case number 52



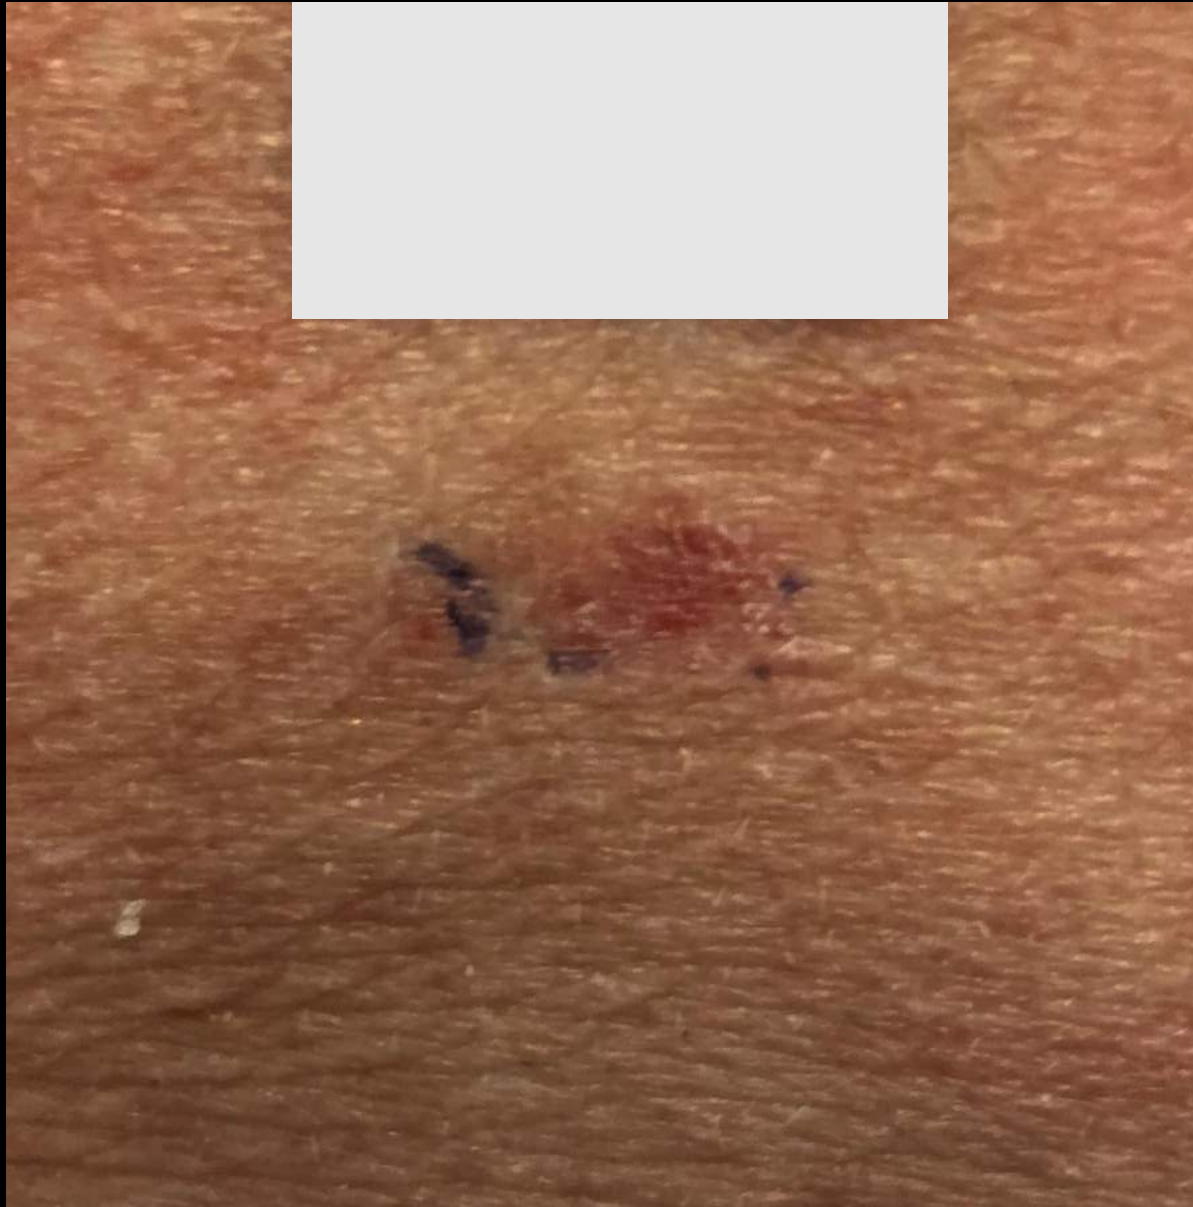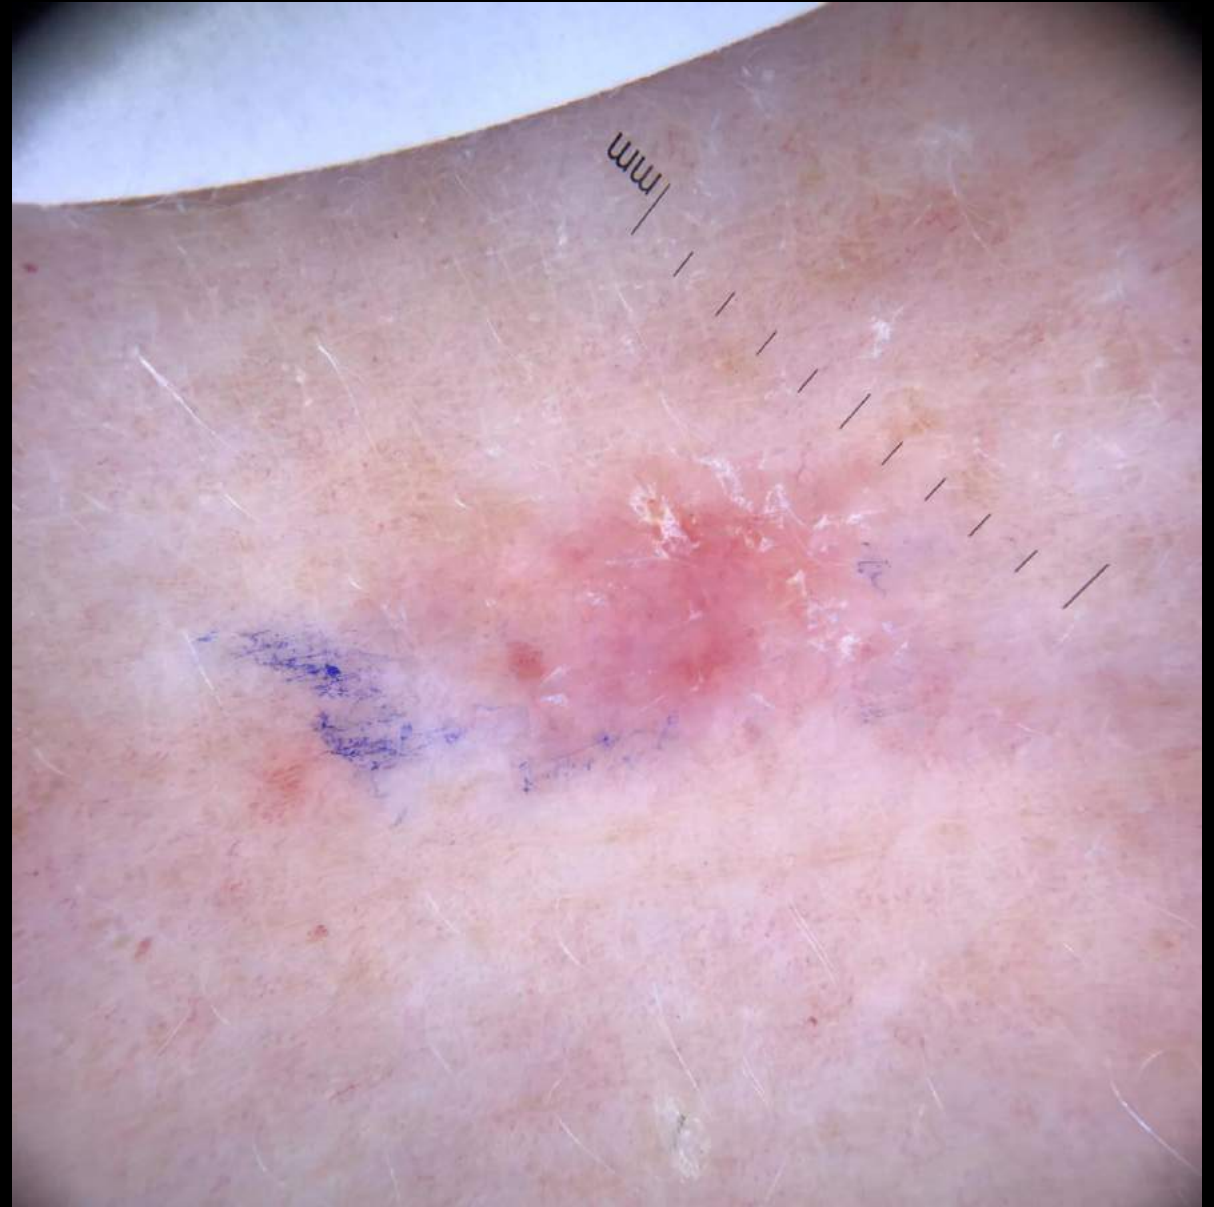

Case number 53



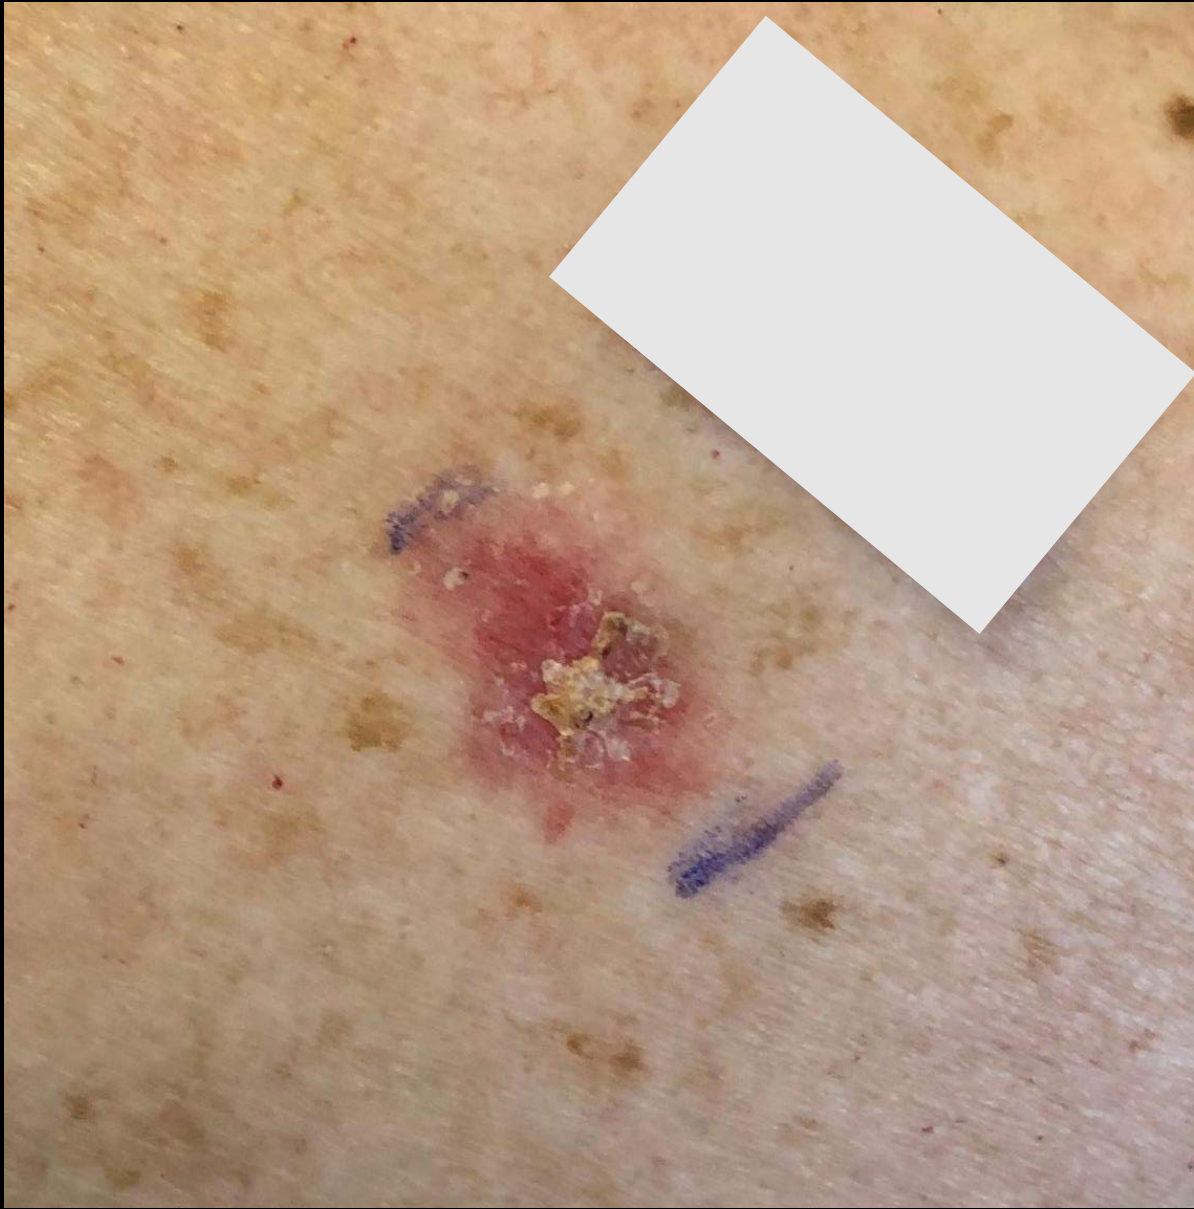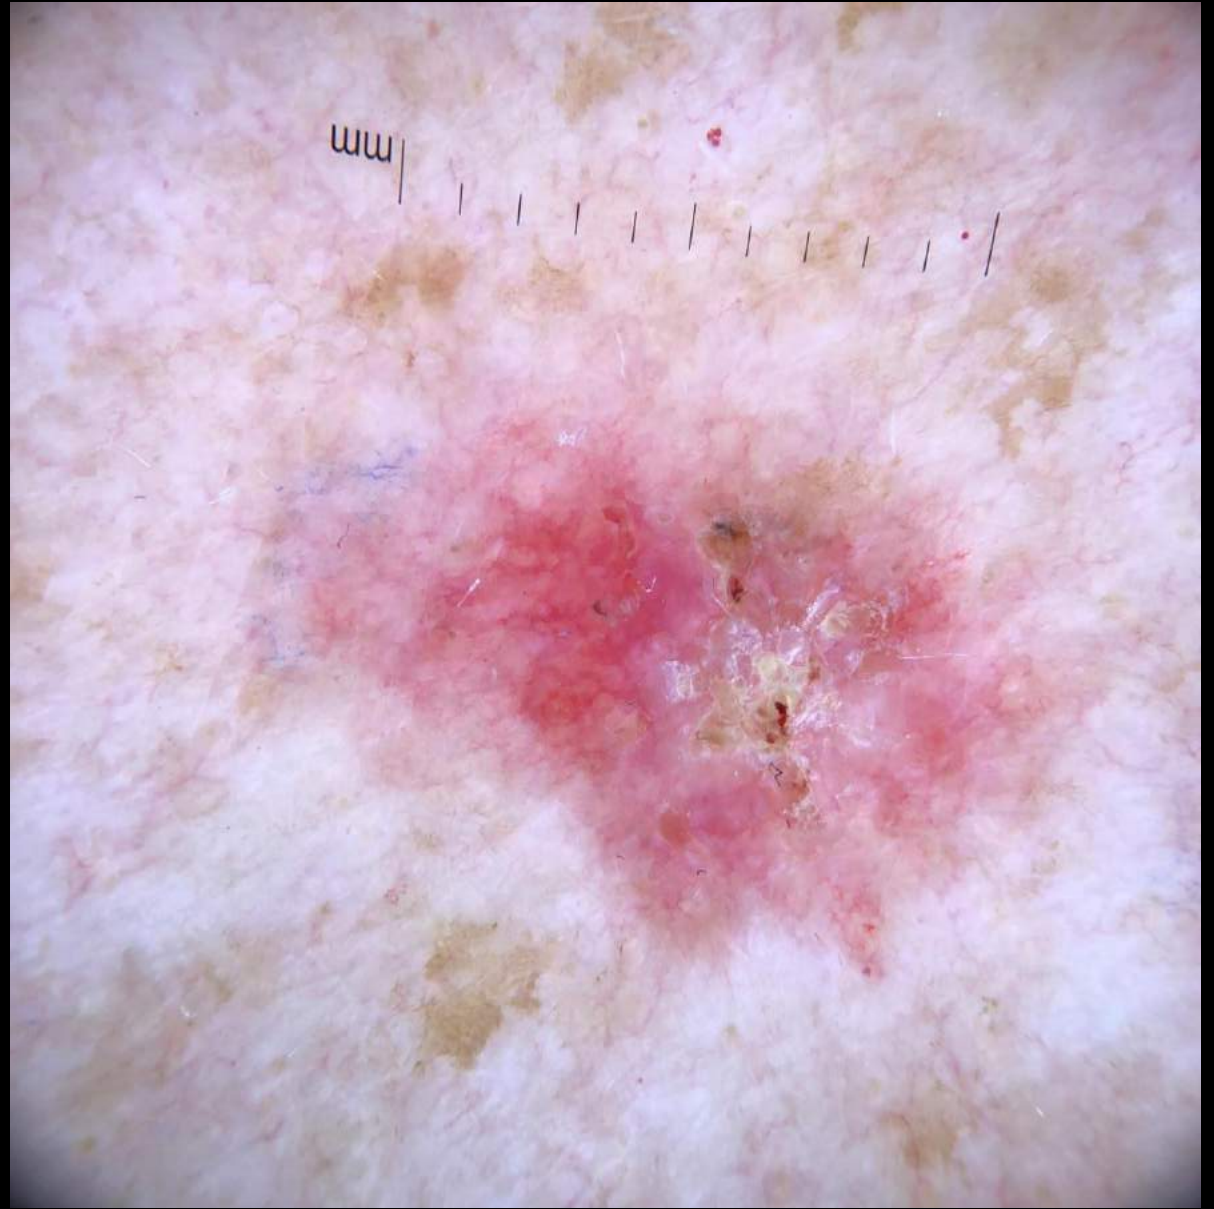

Case number 54



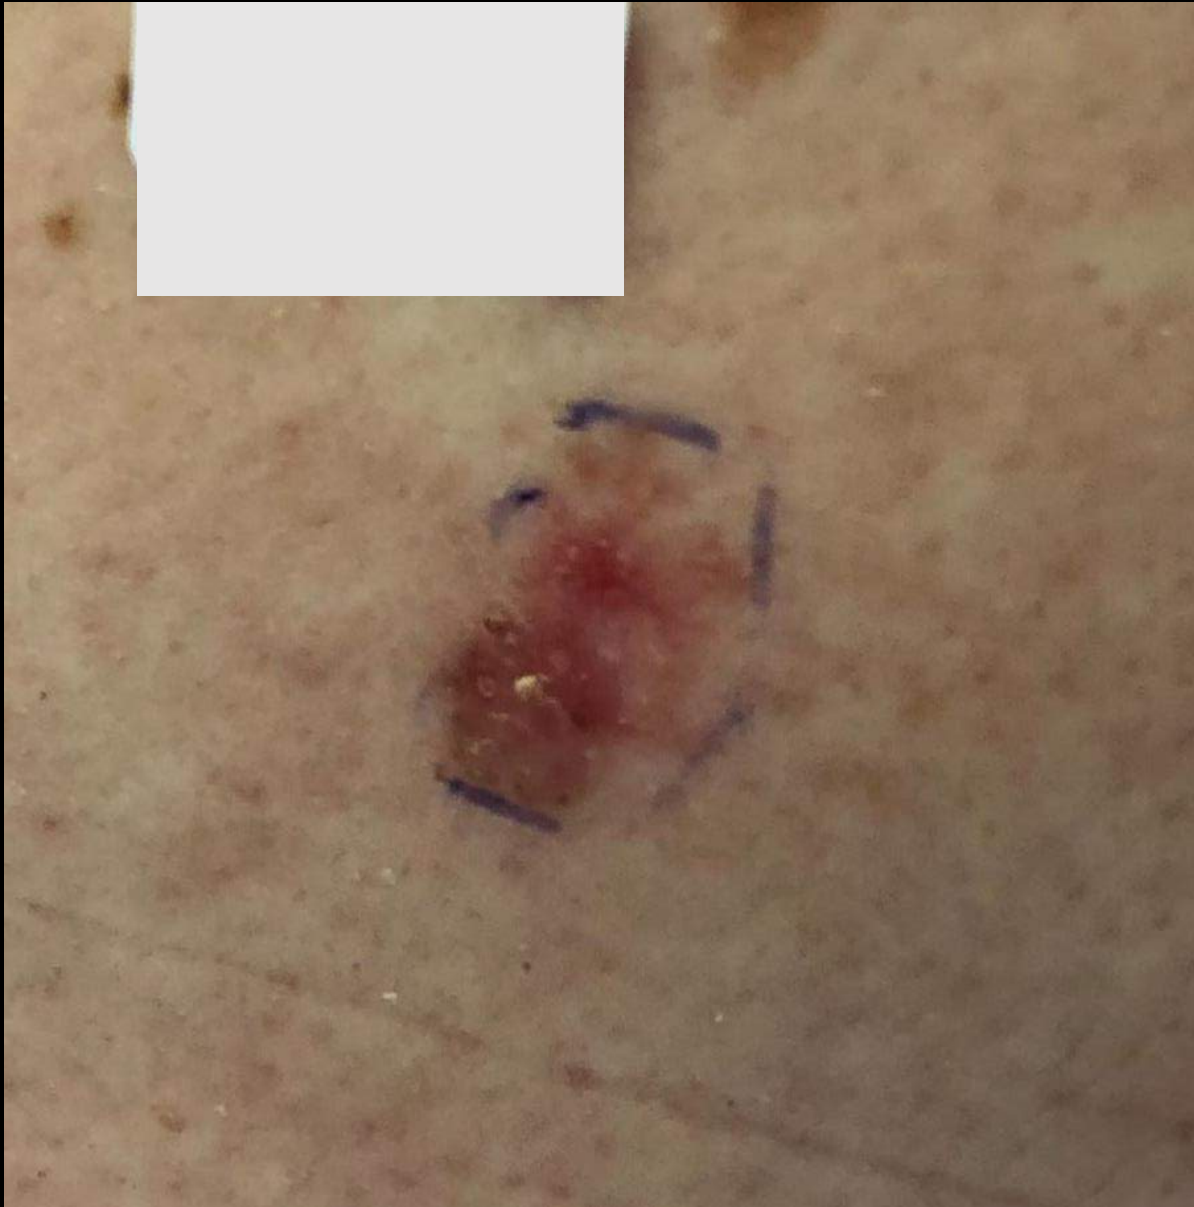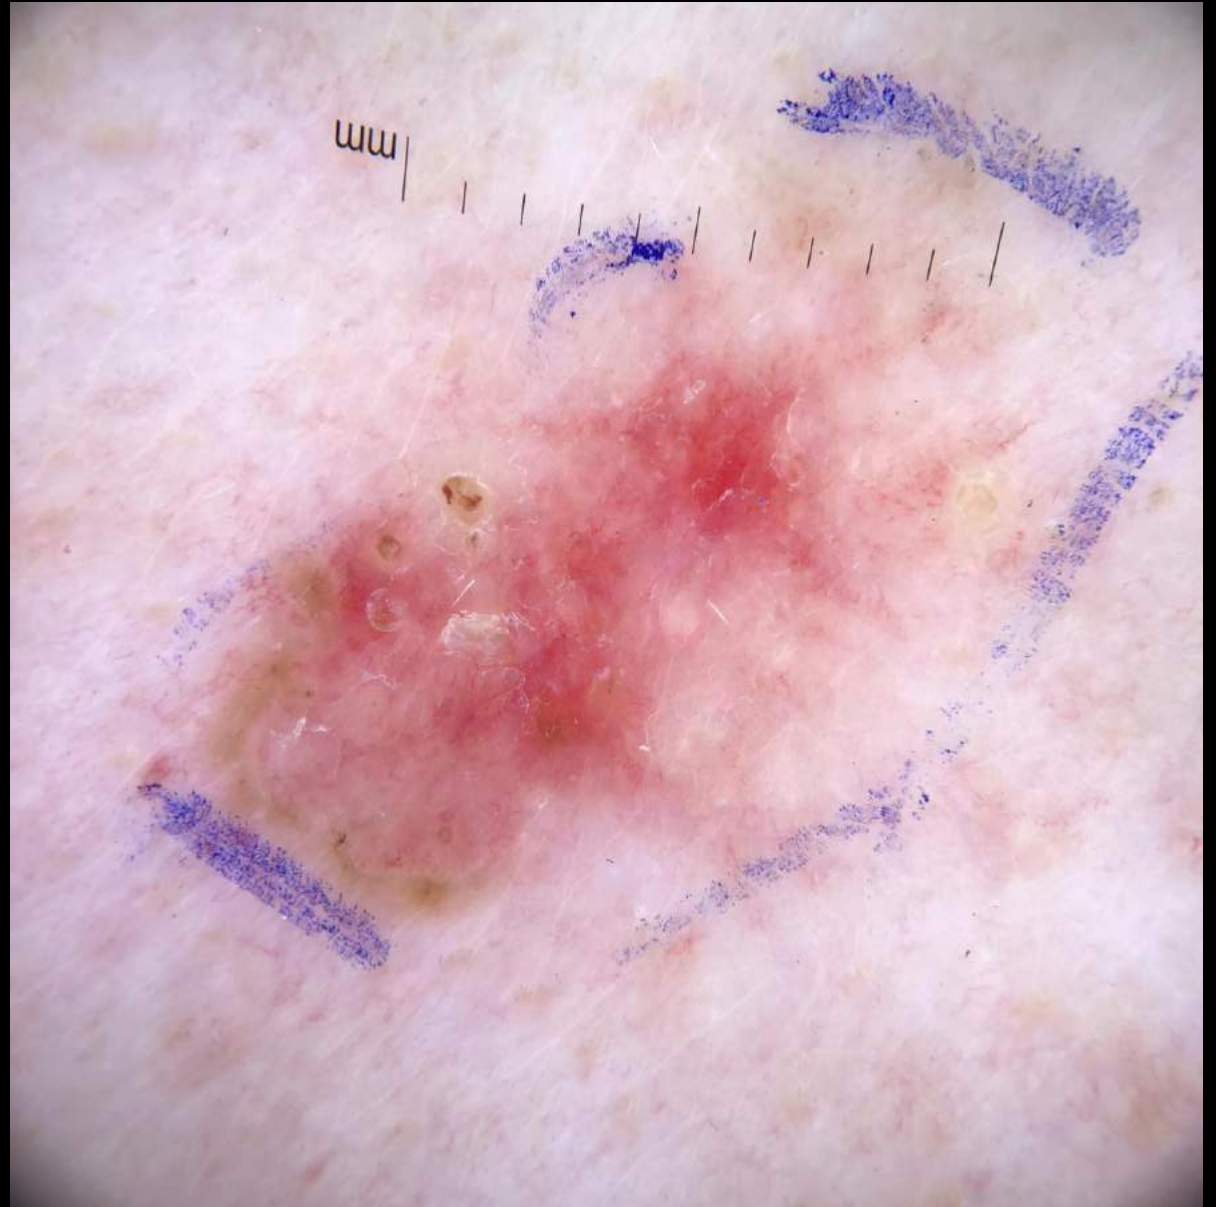

Case number 55



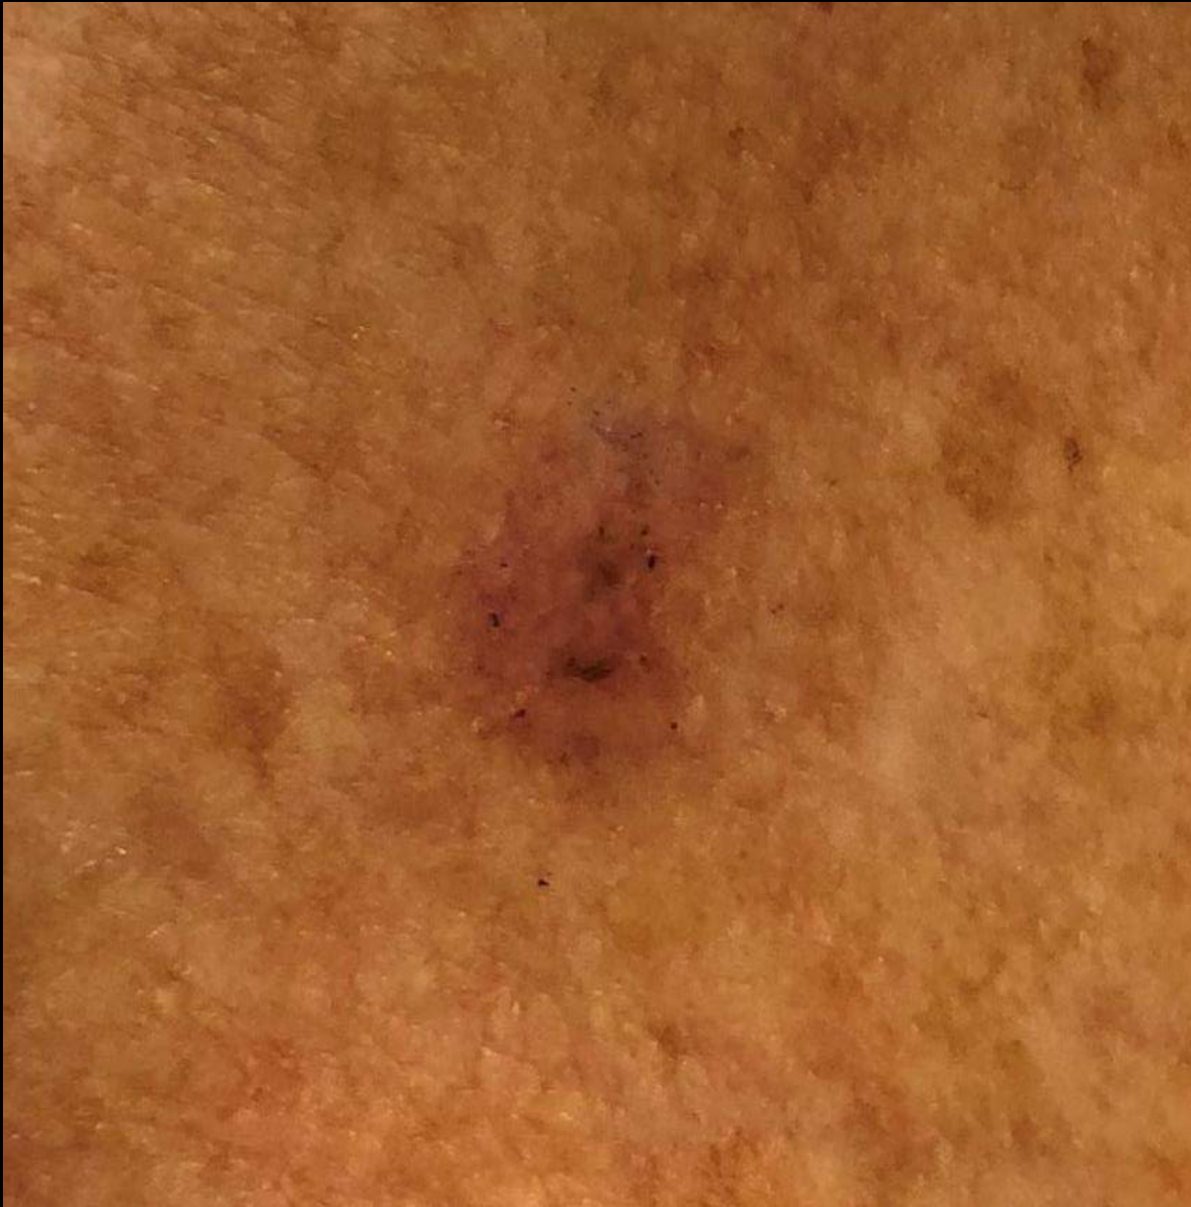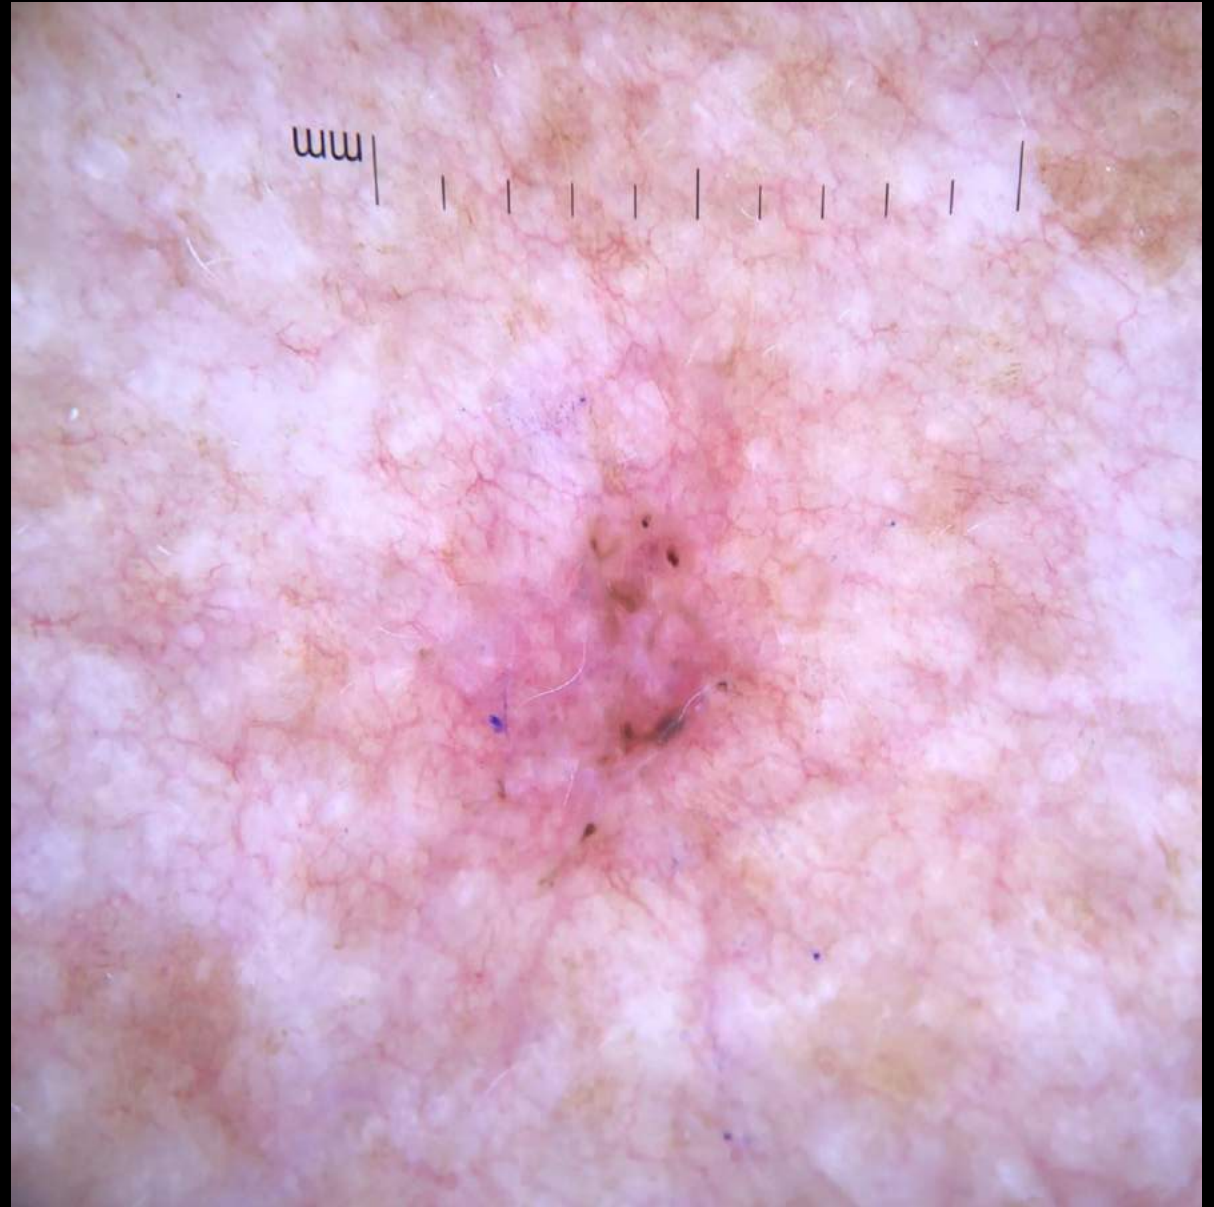

Case number 56



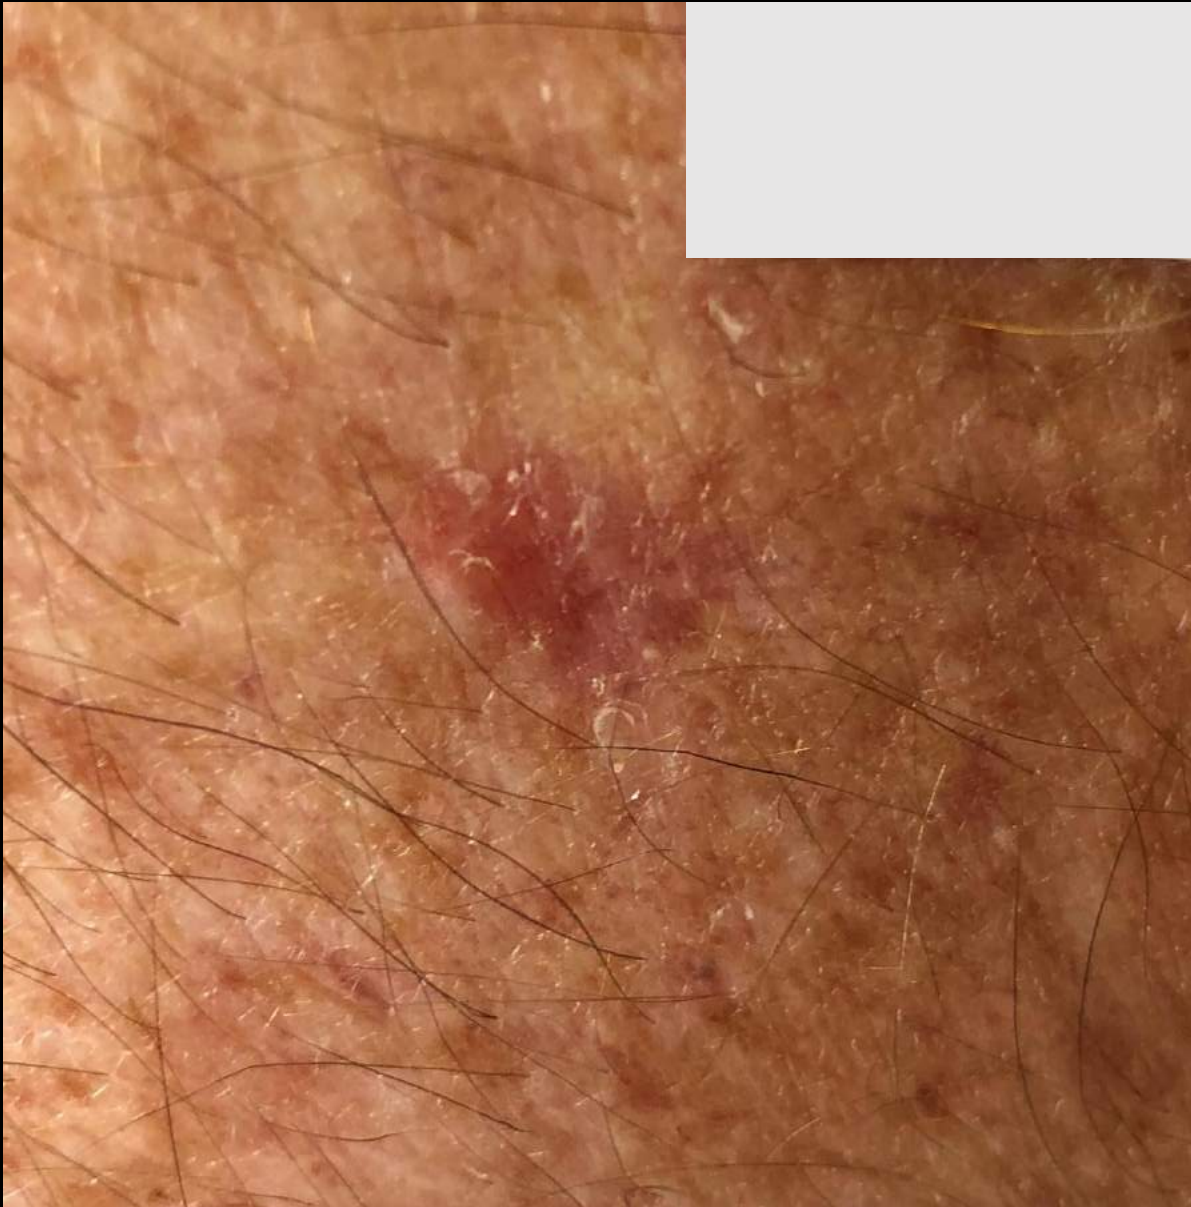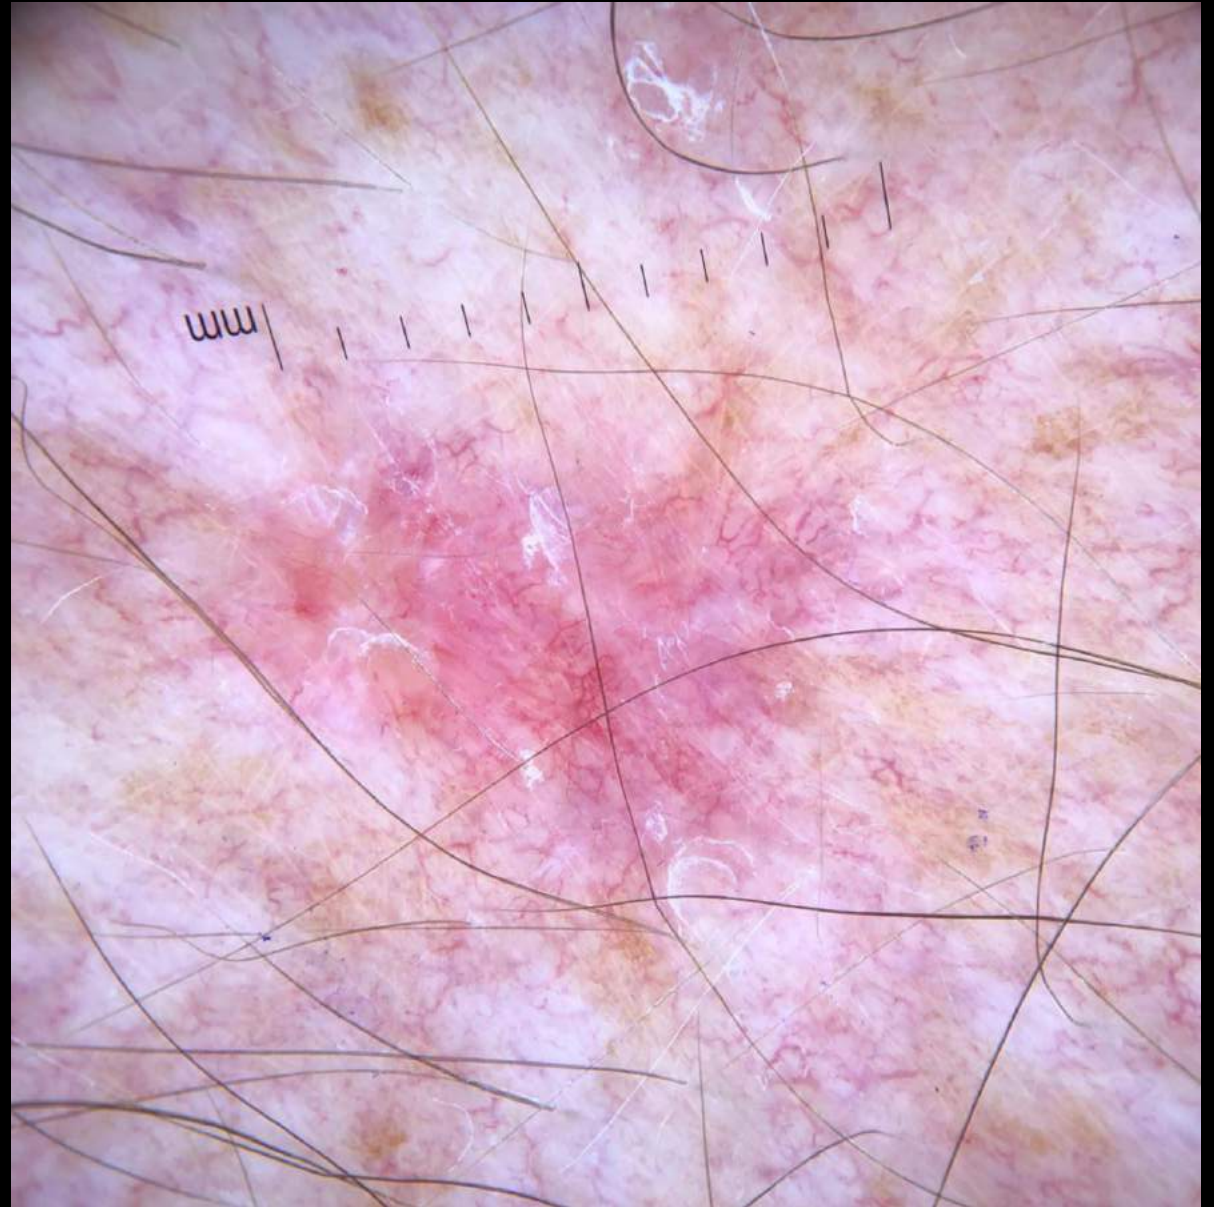

Case number 57



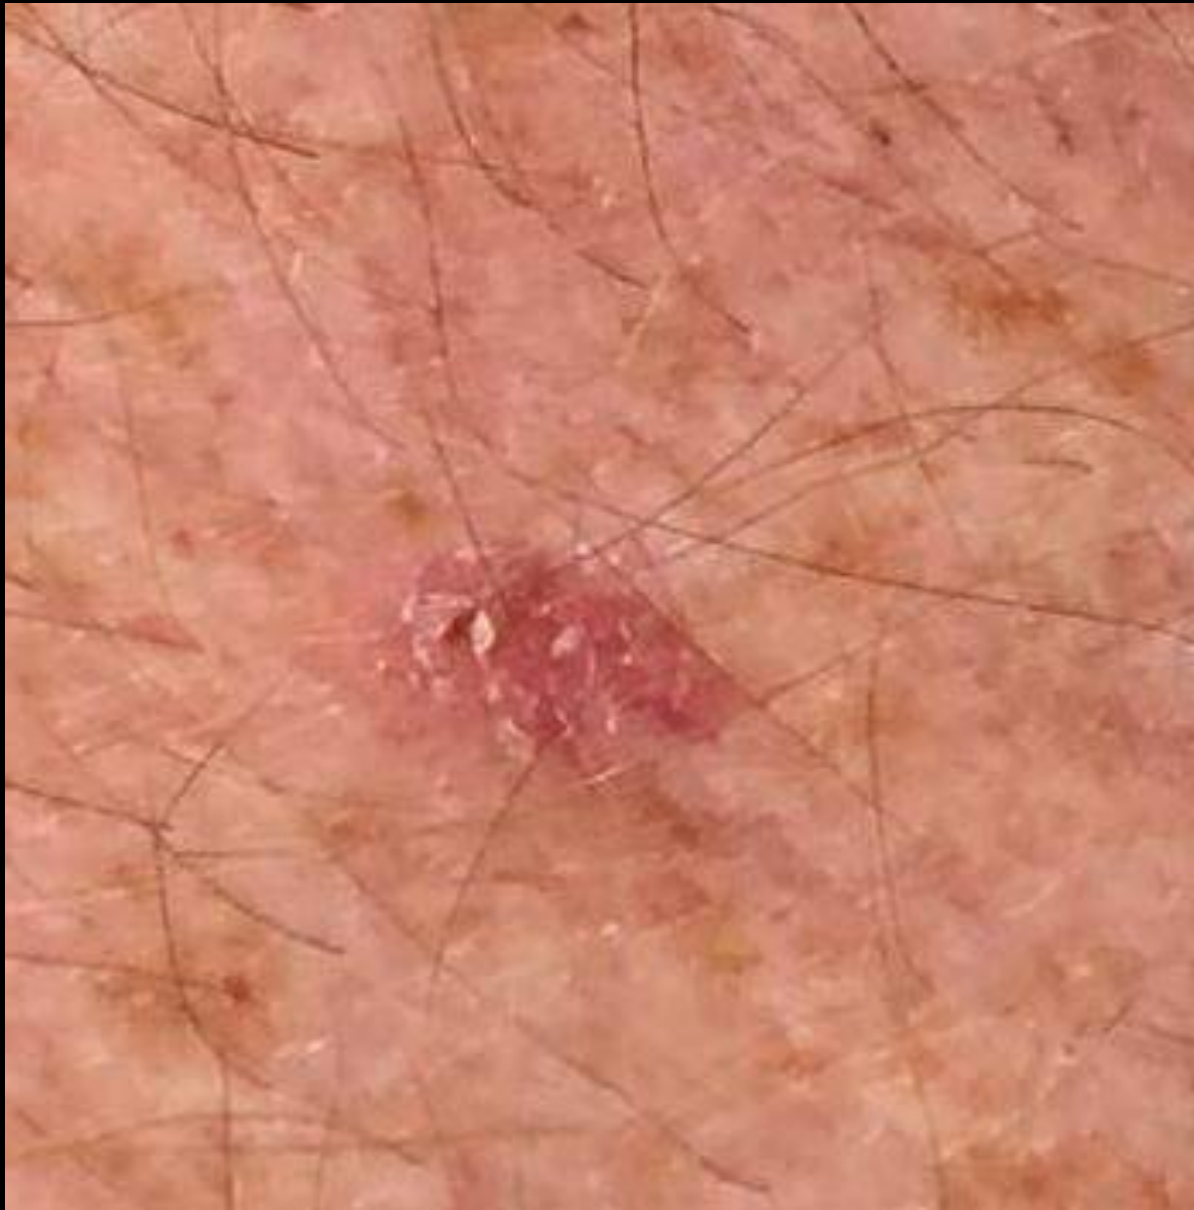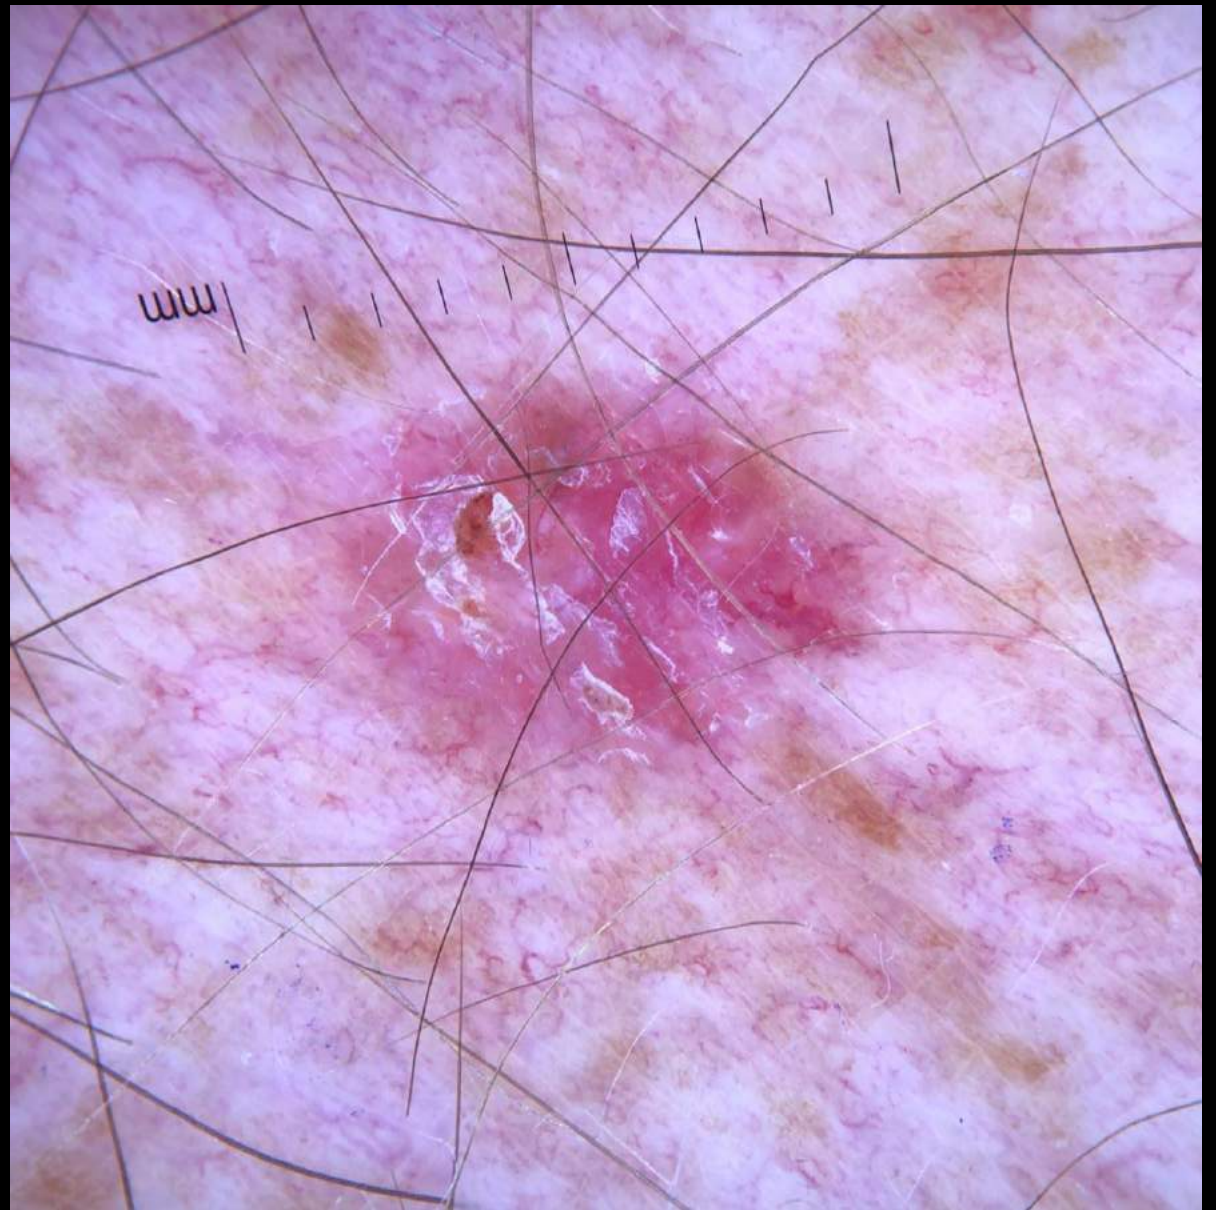

Case number 58



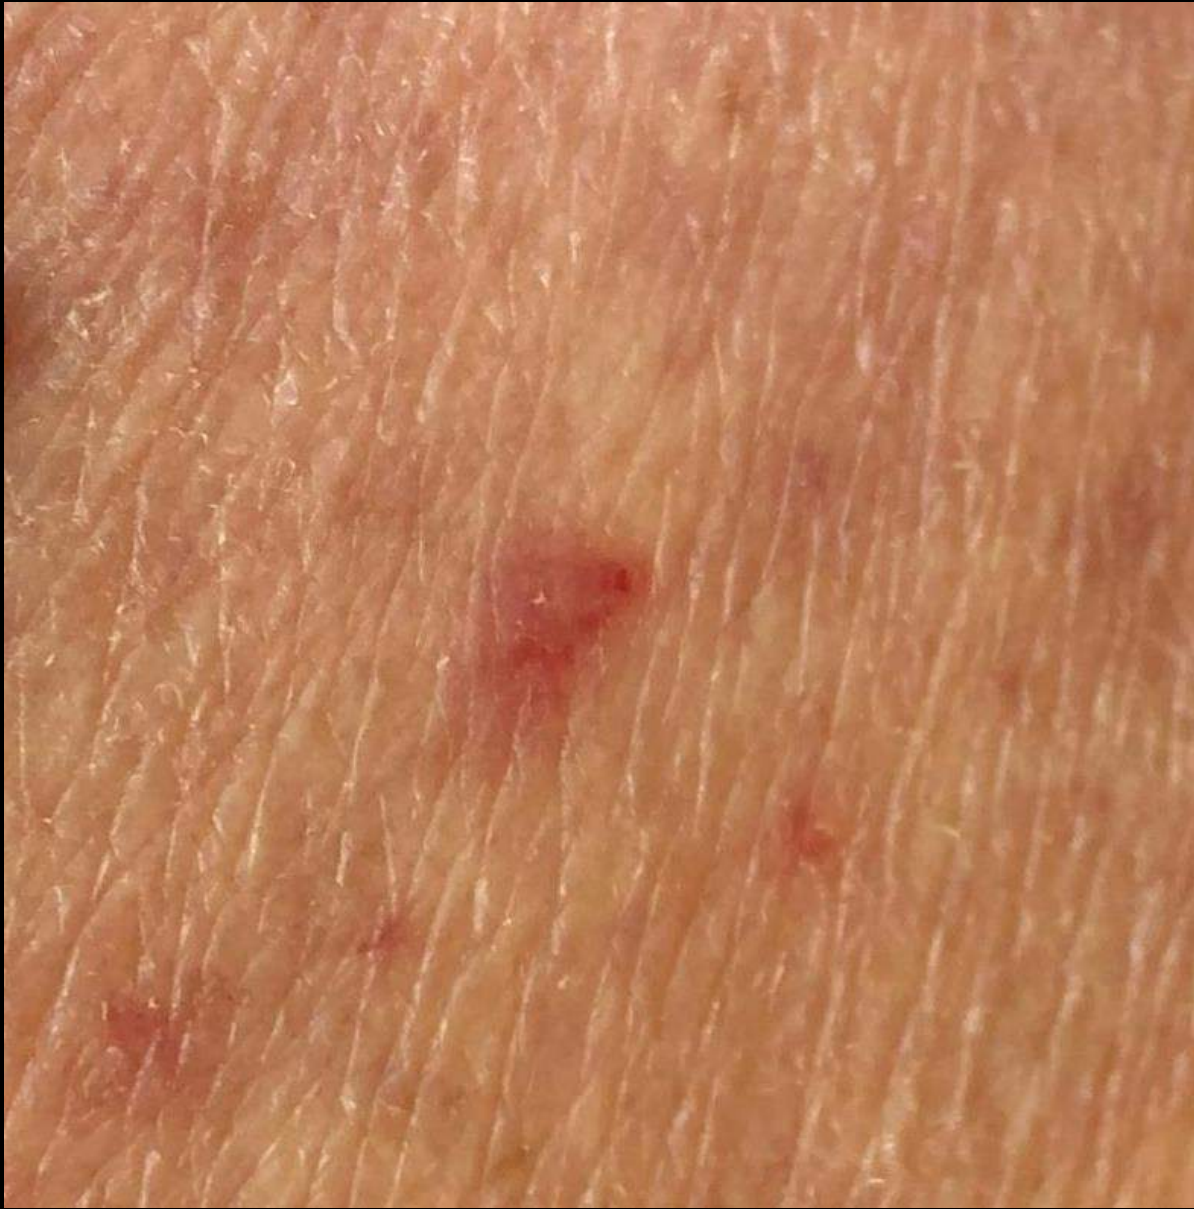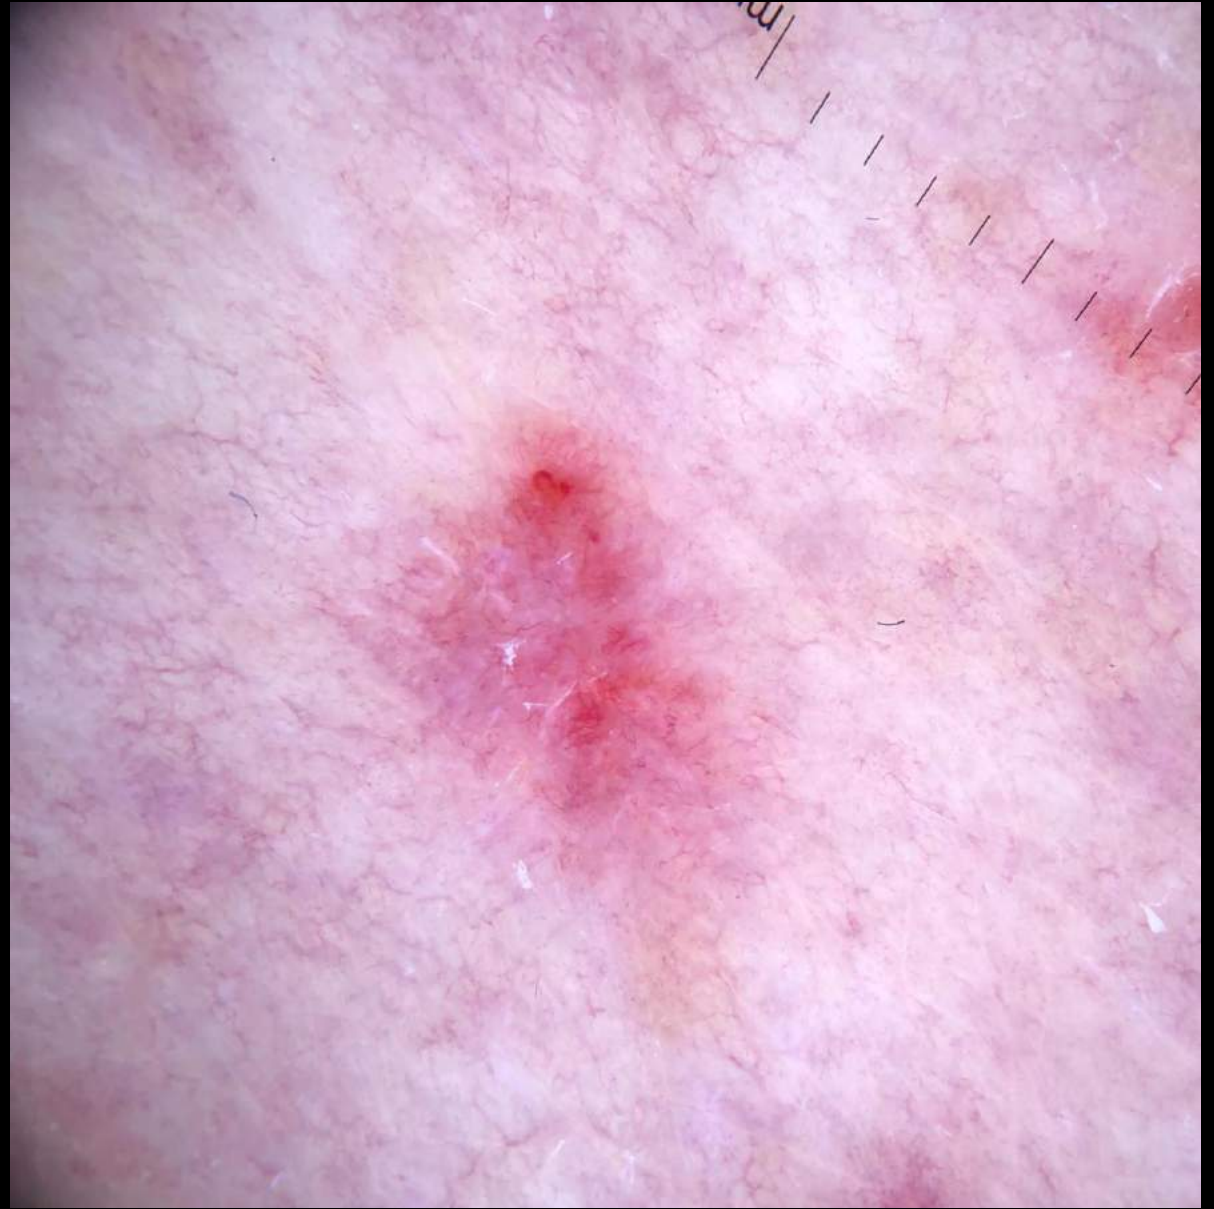

Case number 59



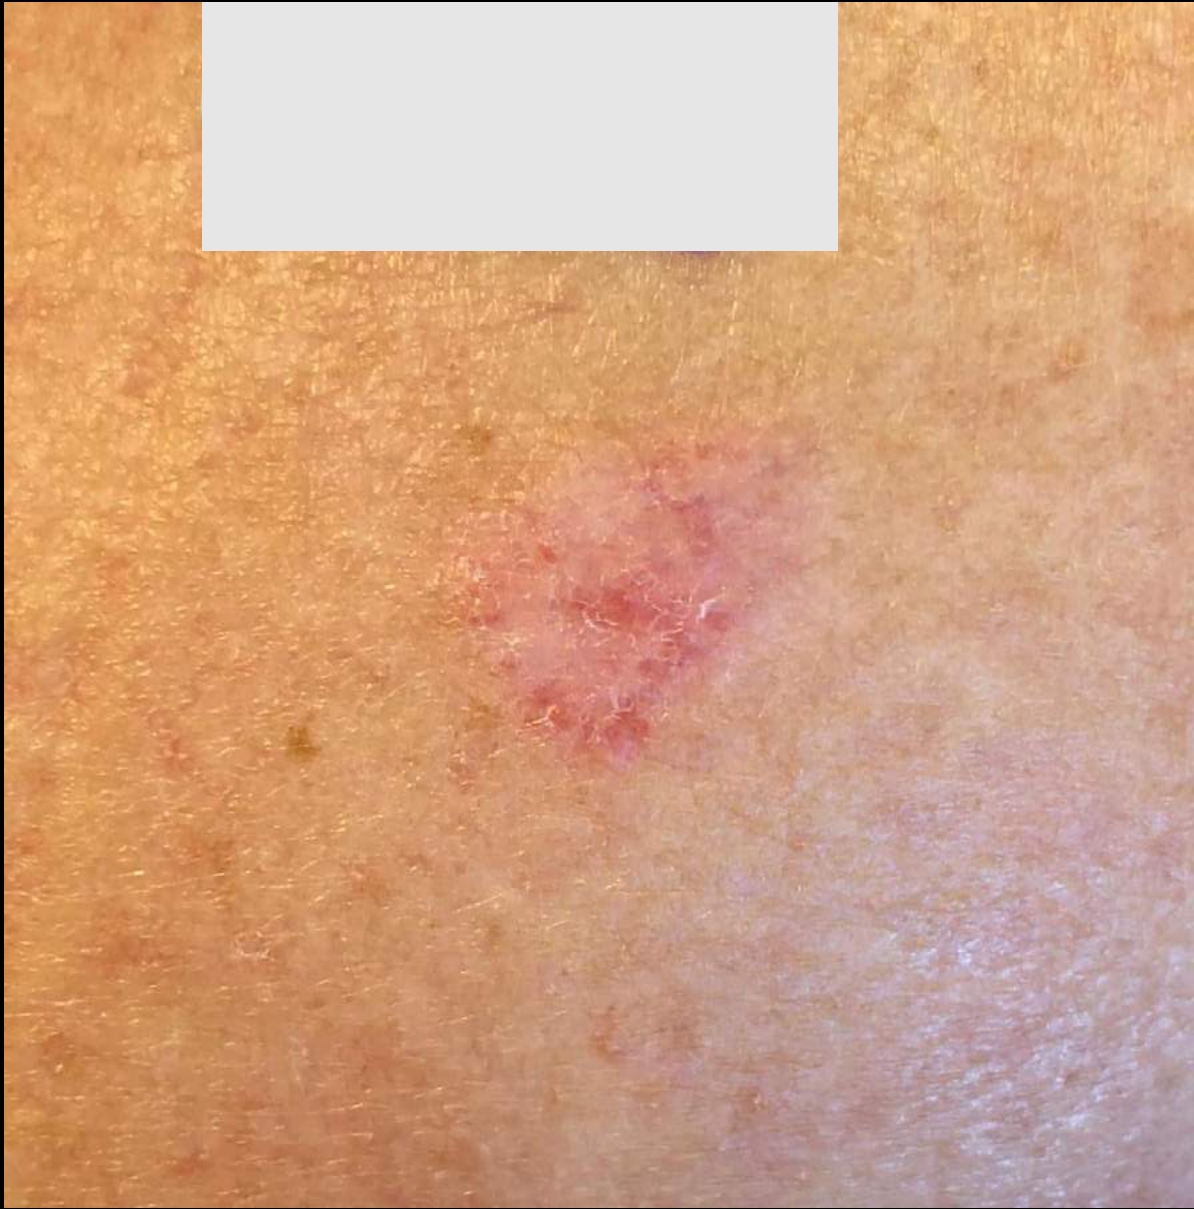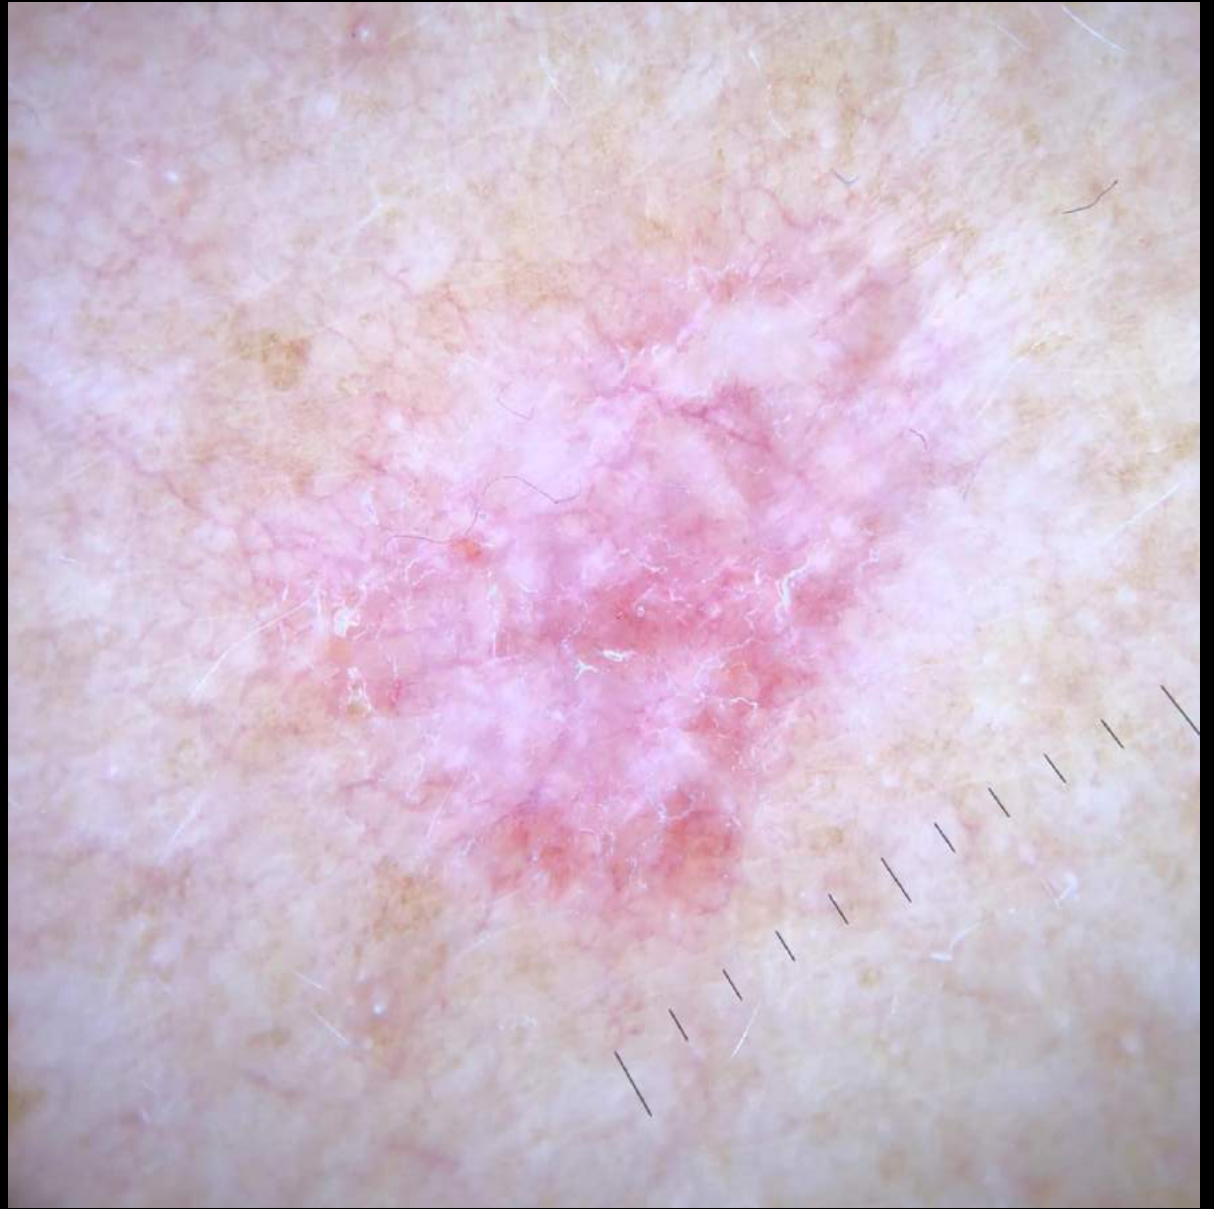

Case number 60



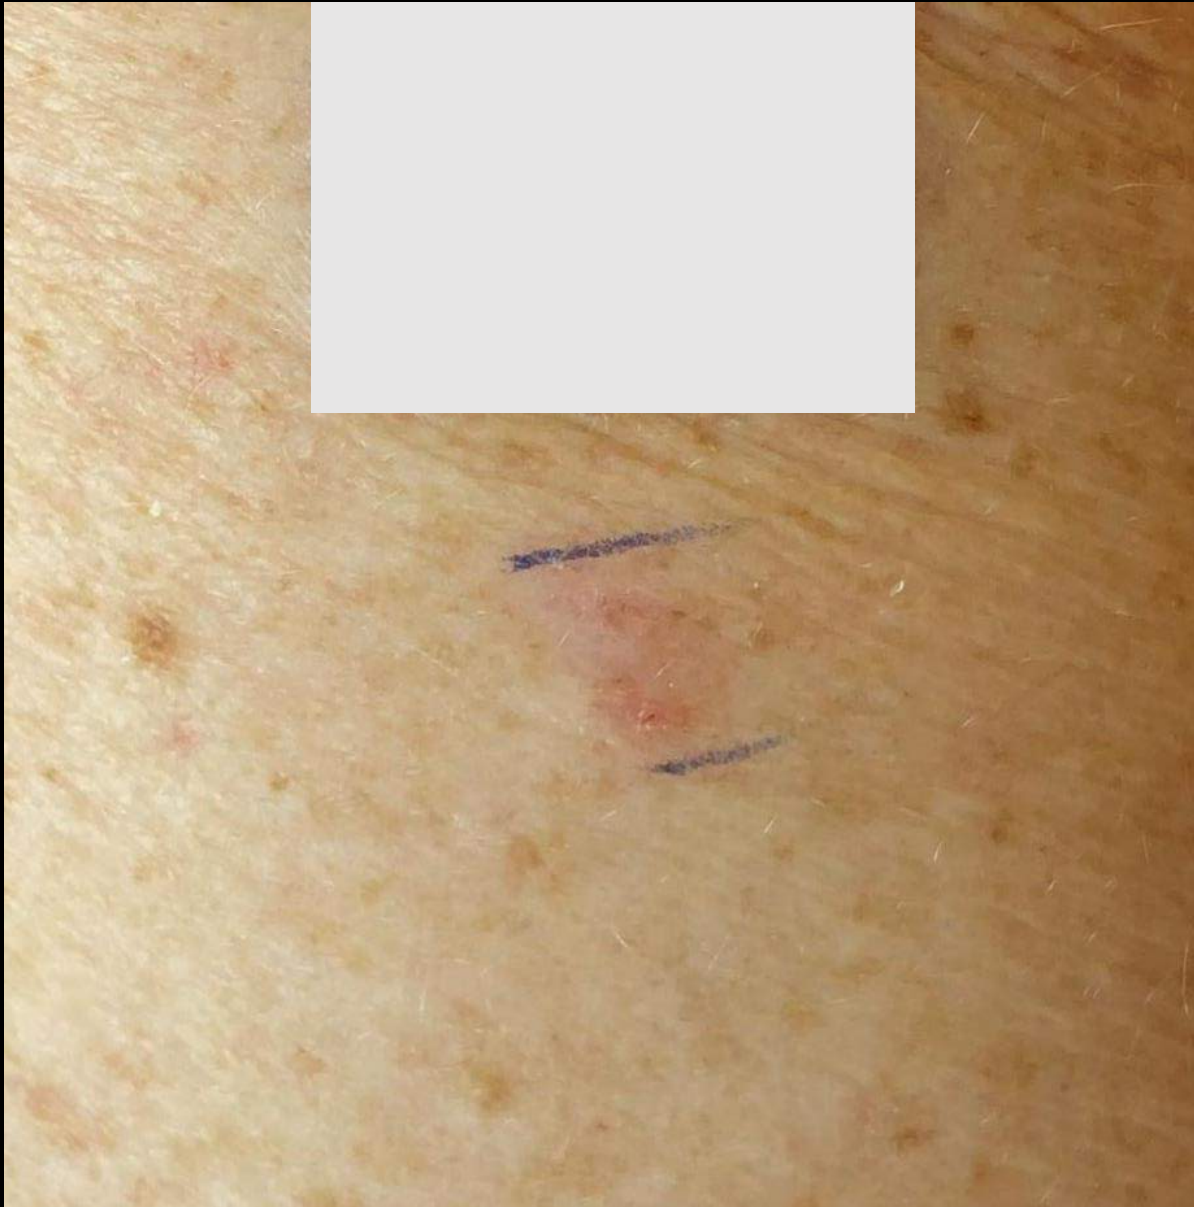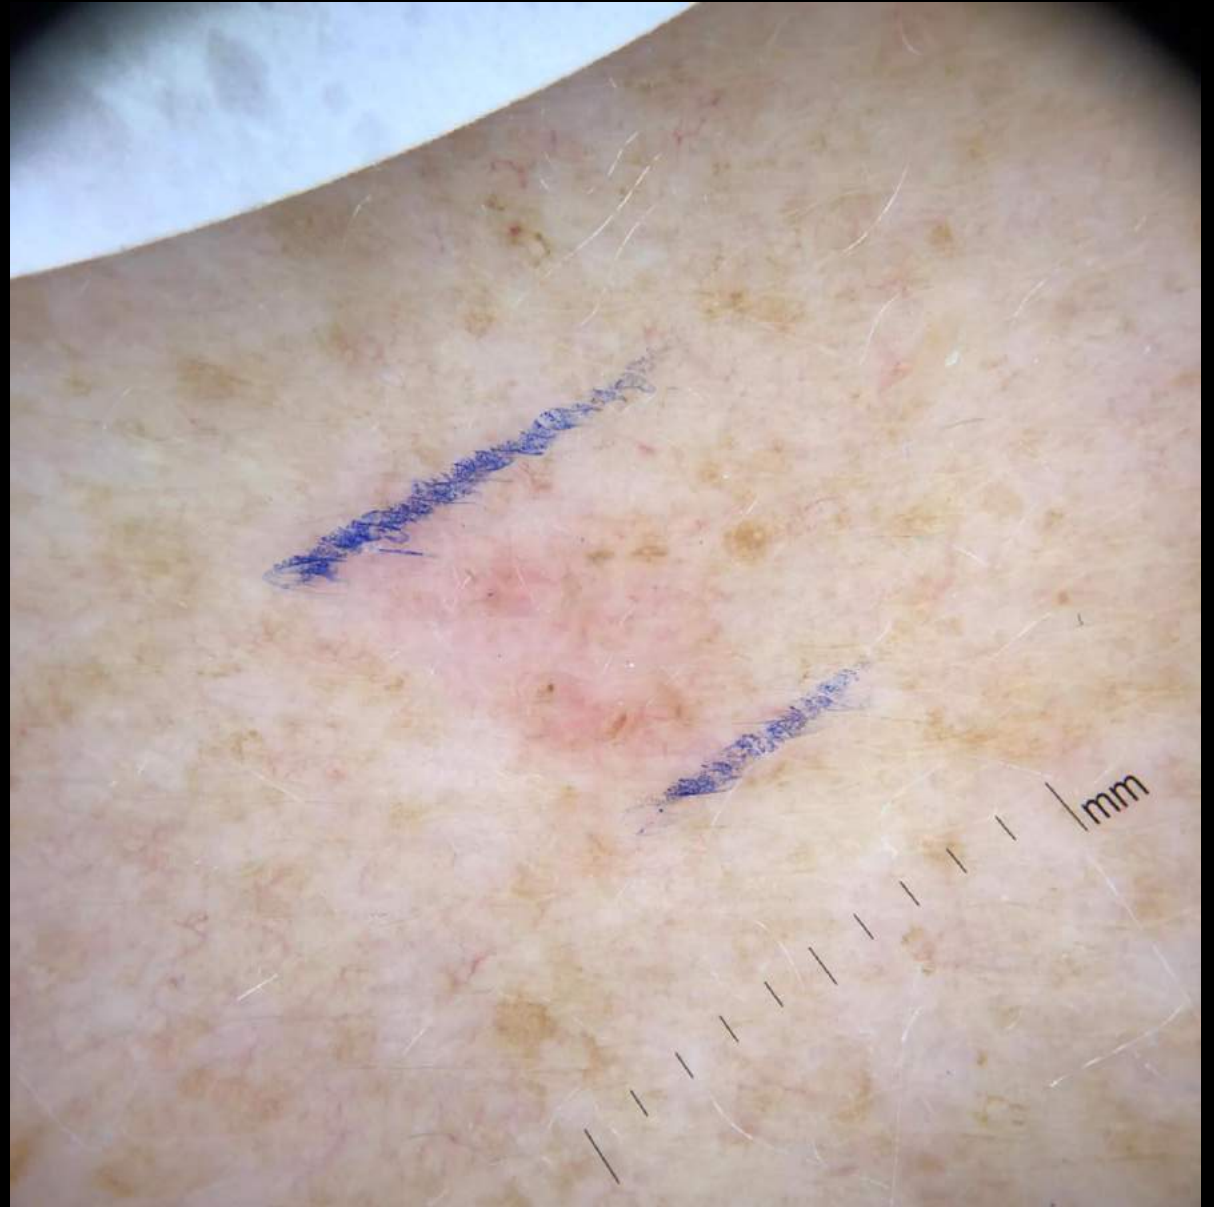

Case number 61



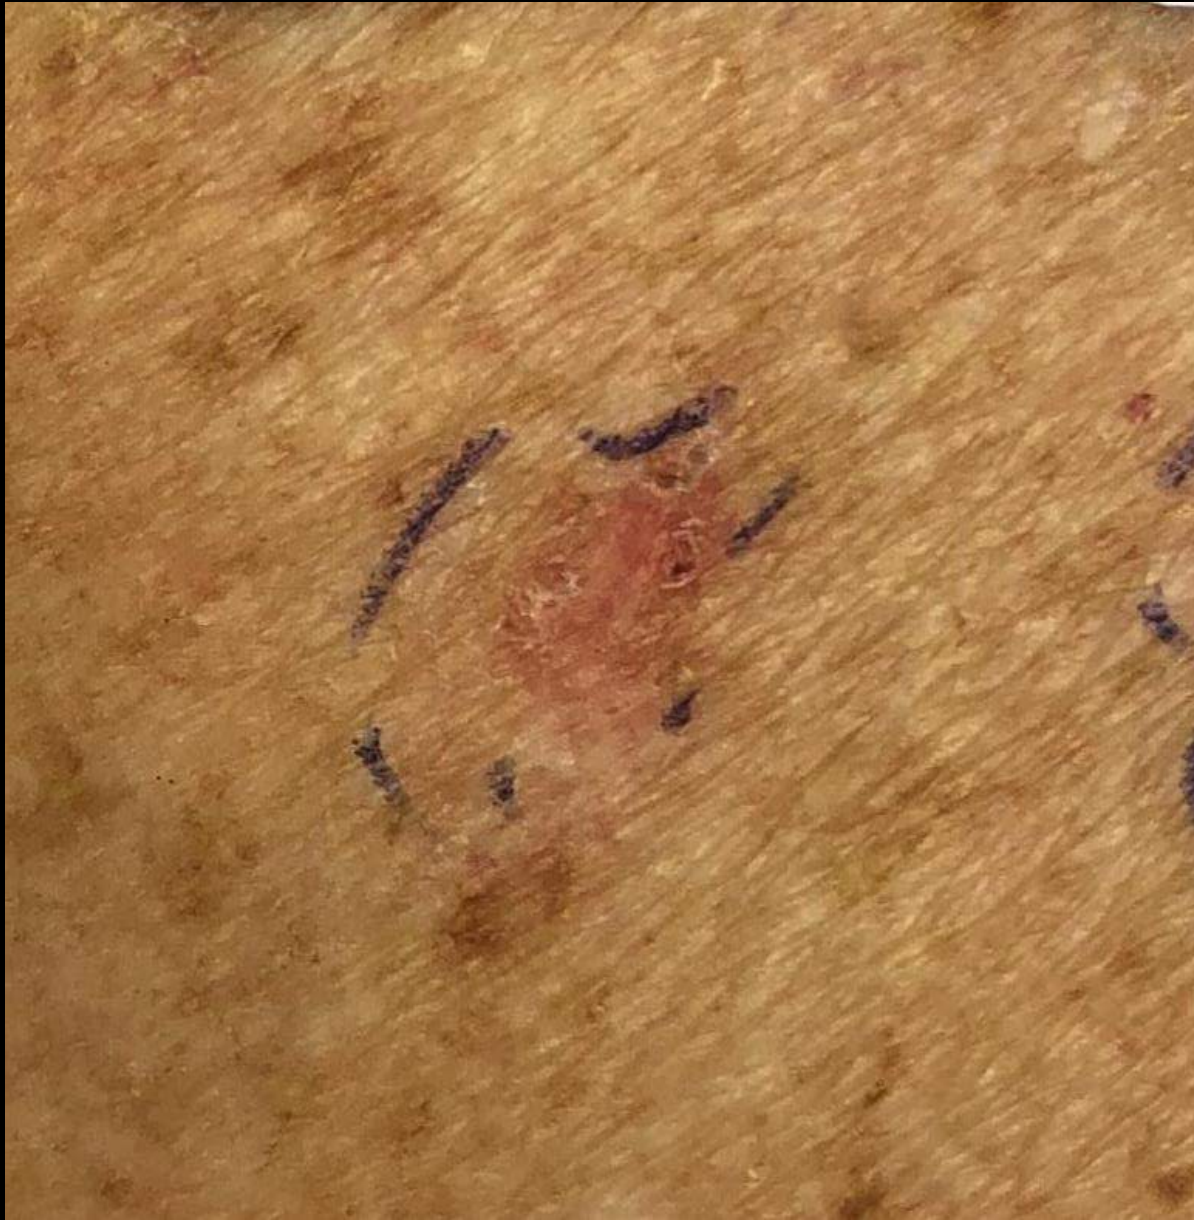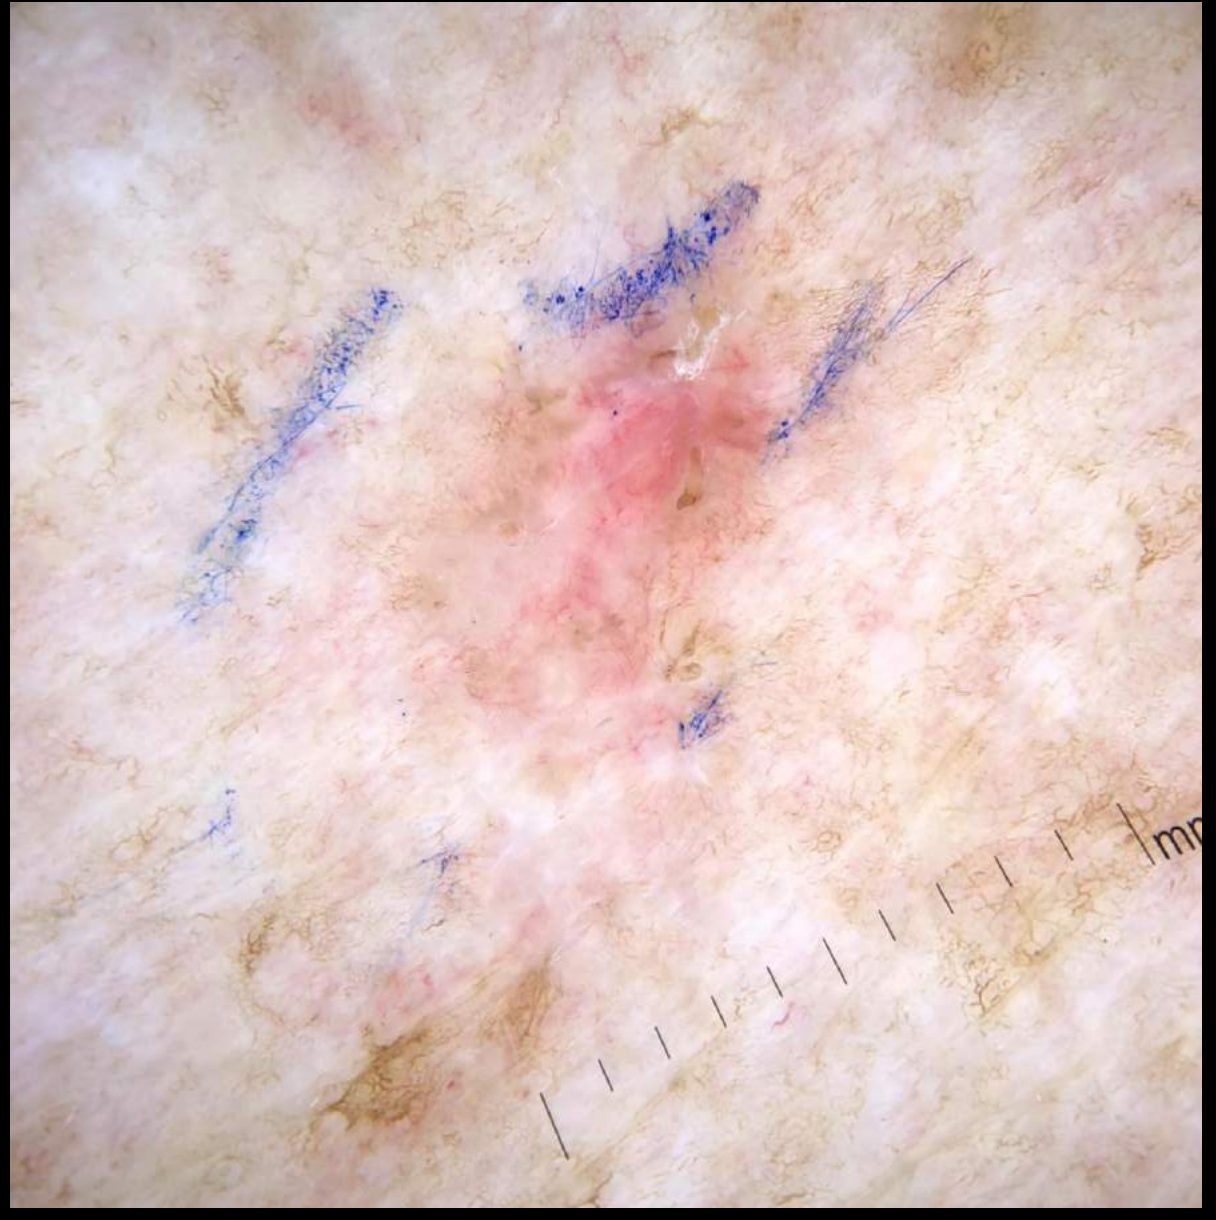

Case number 62



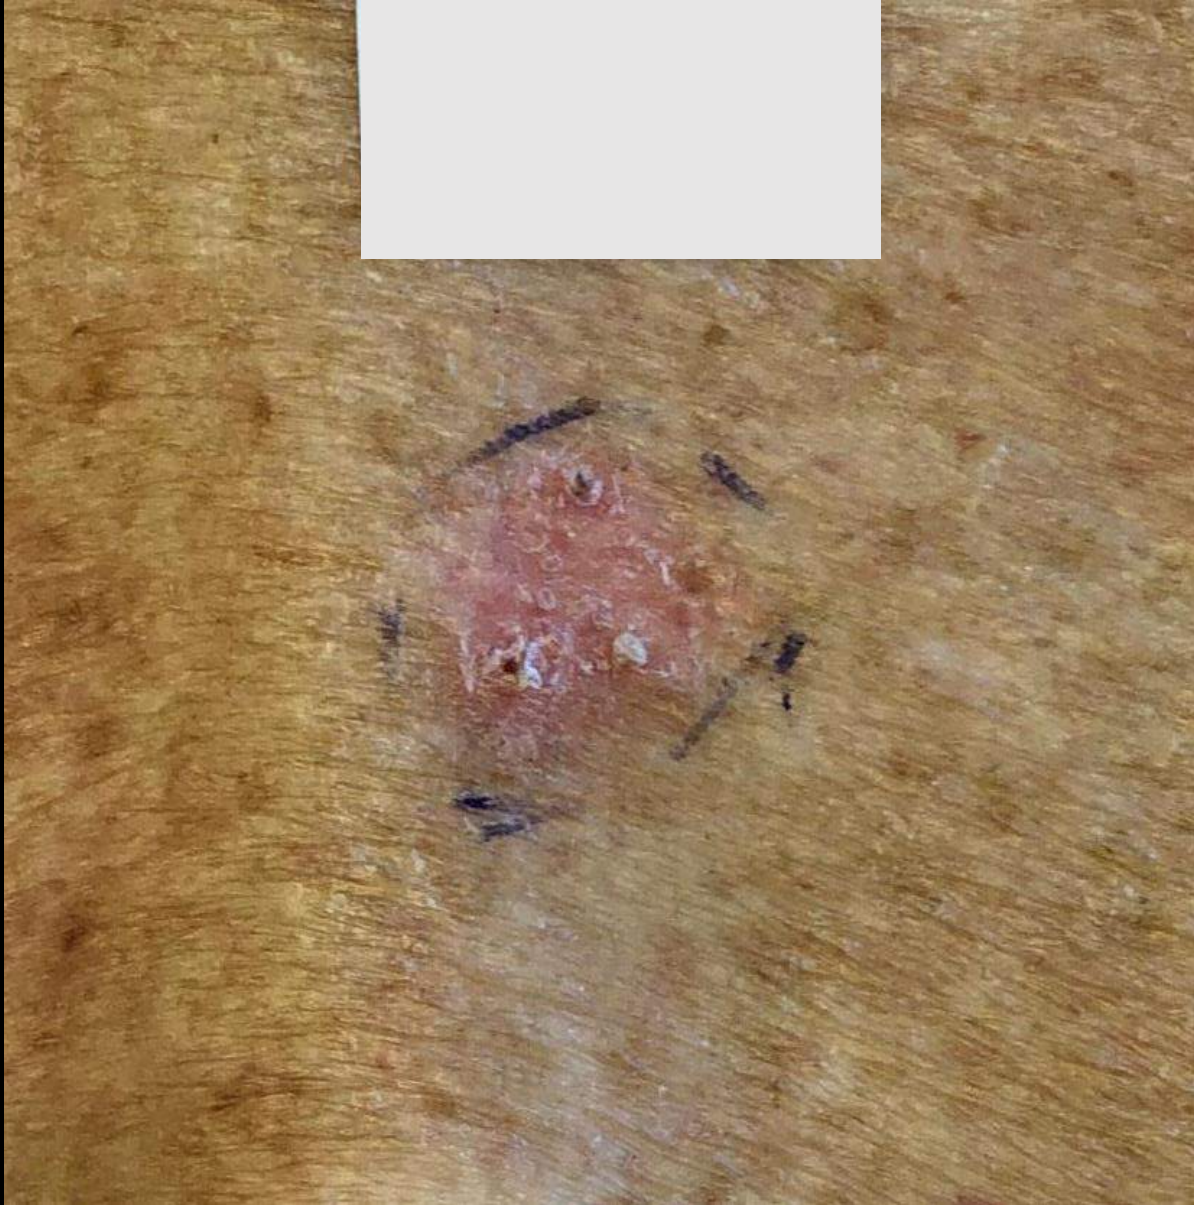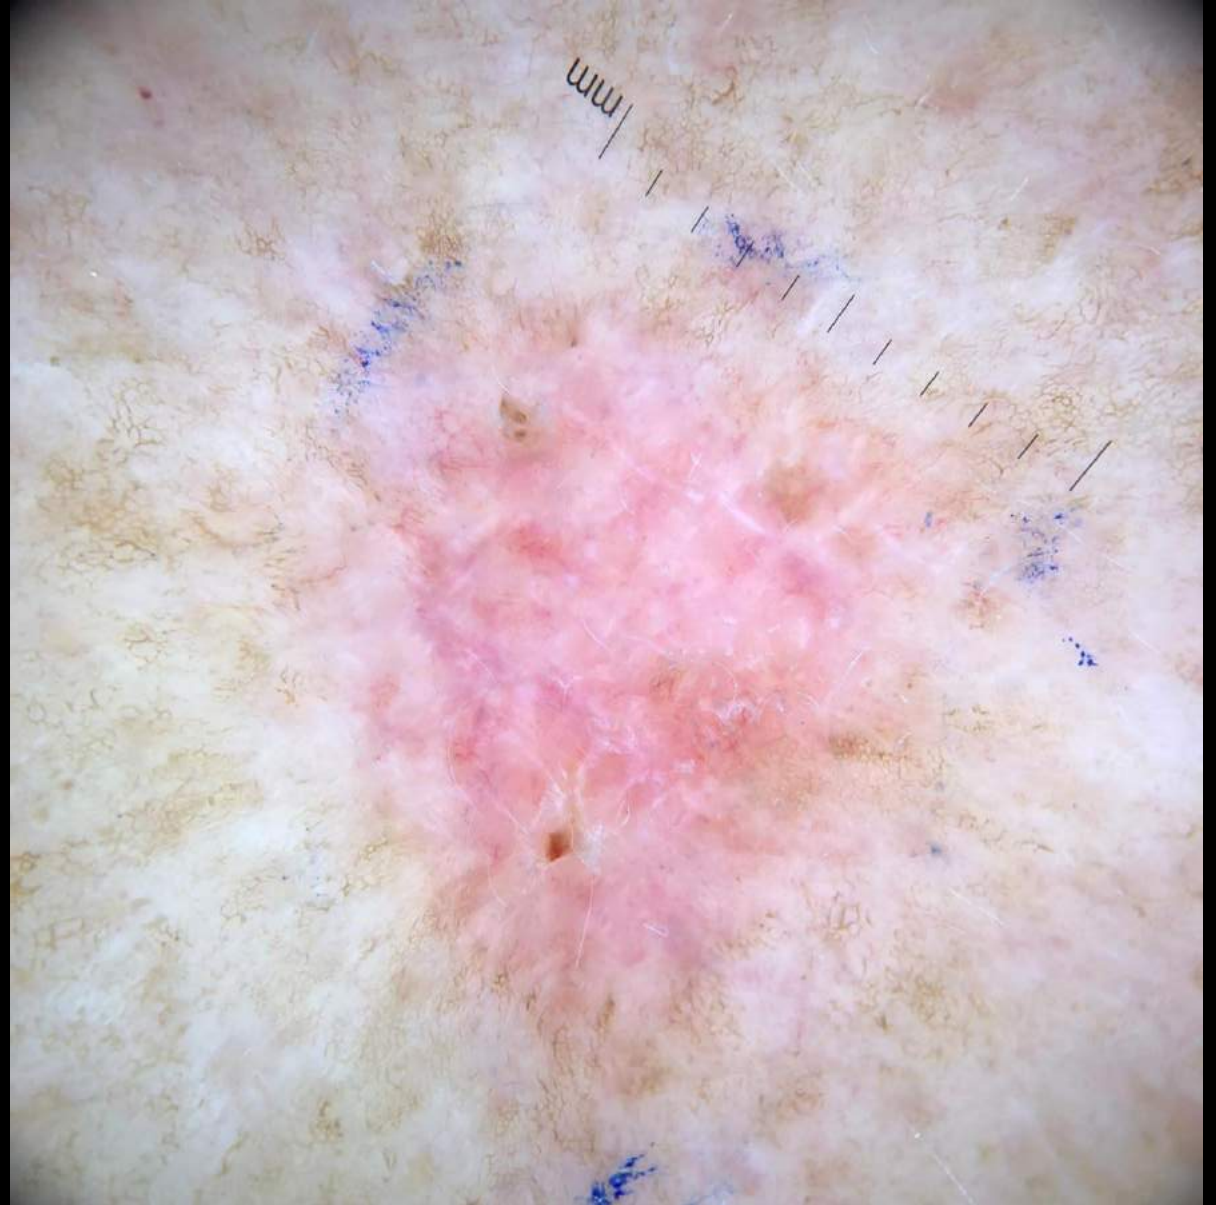

Case number 63



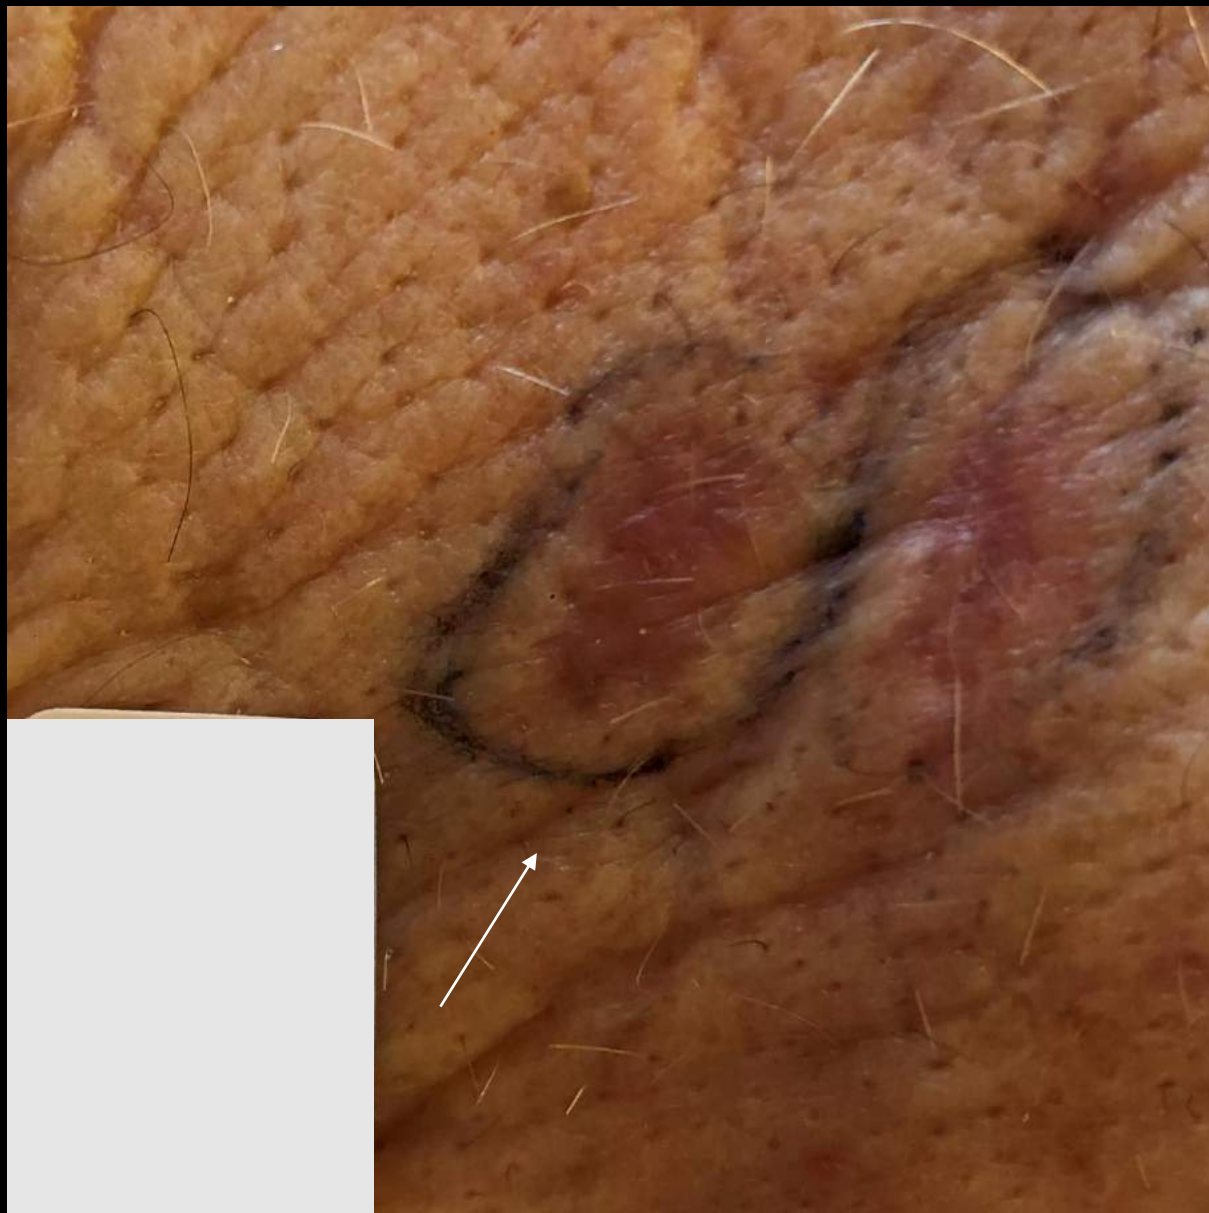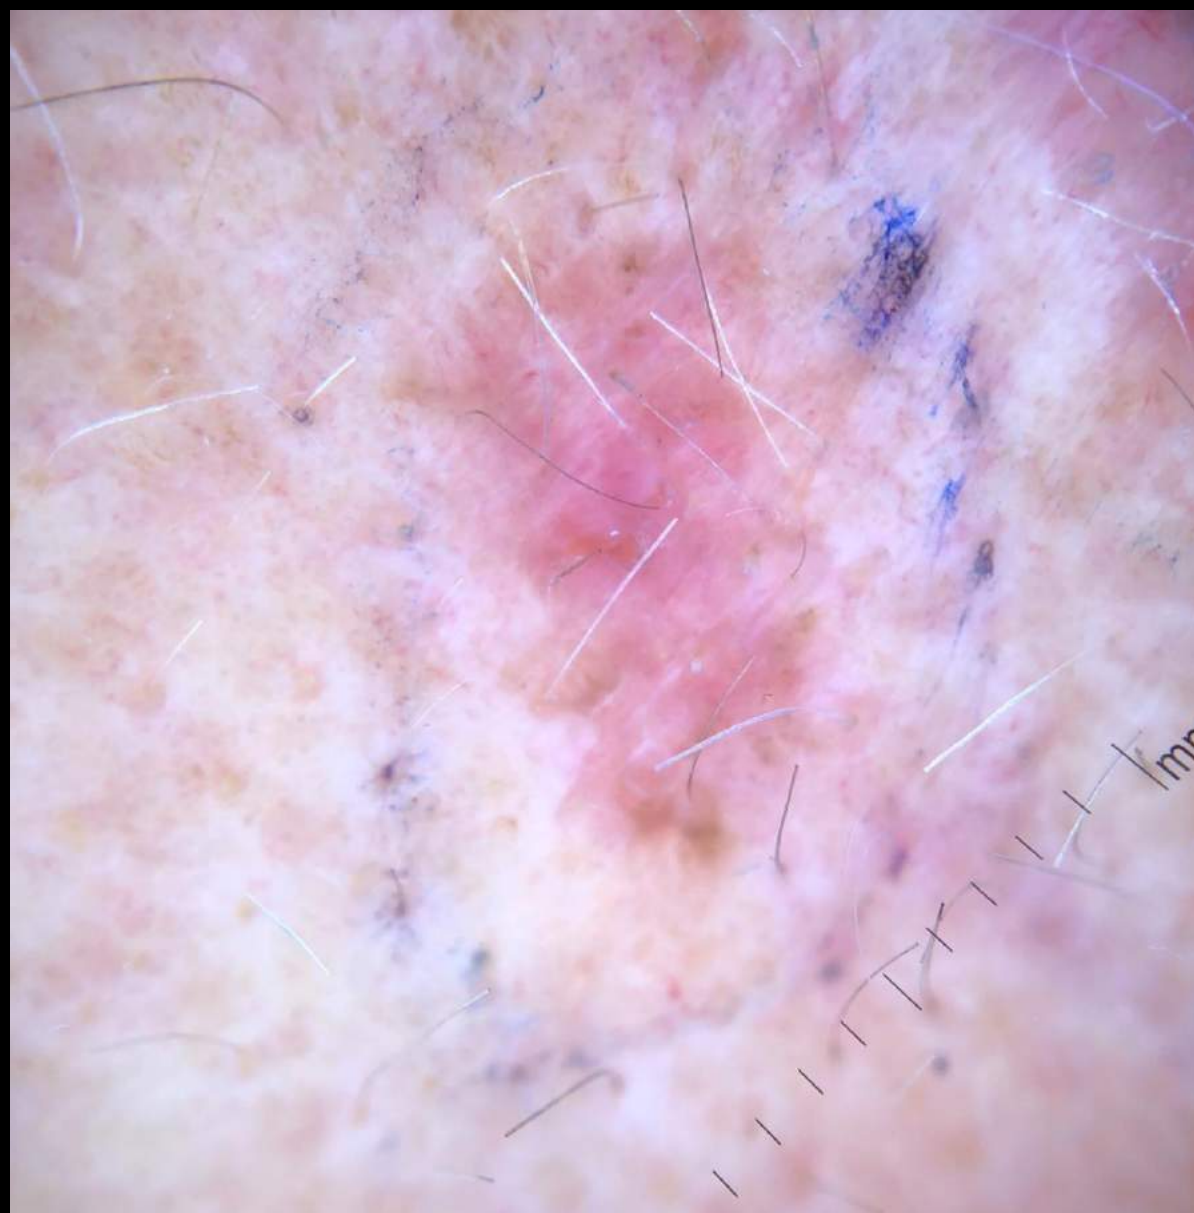

Case number 64



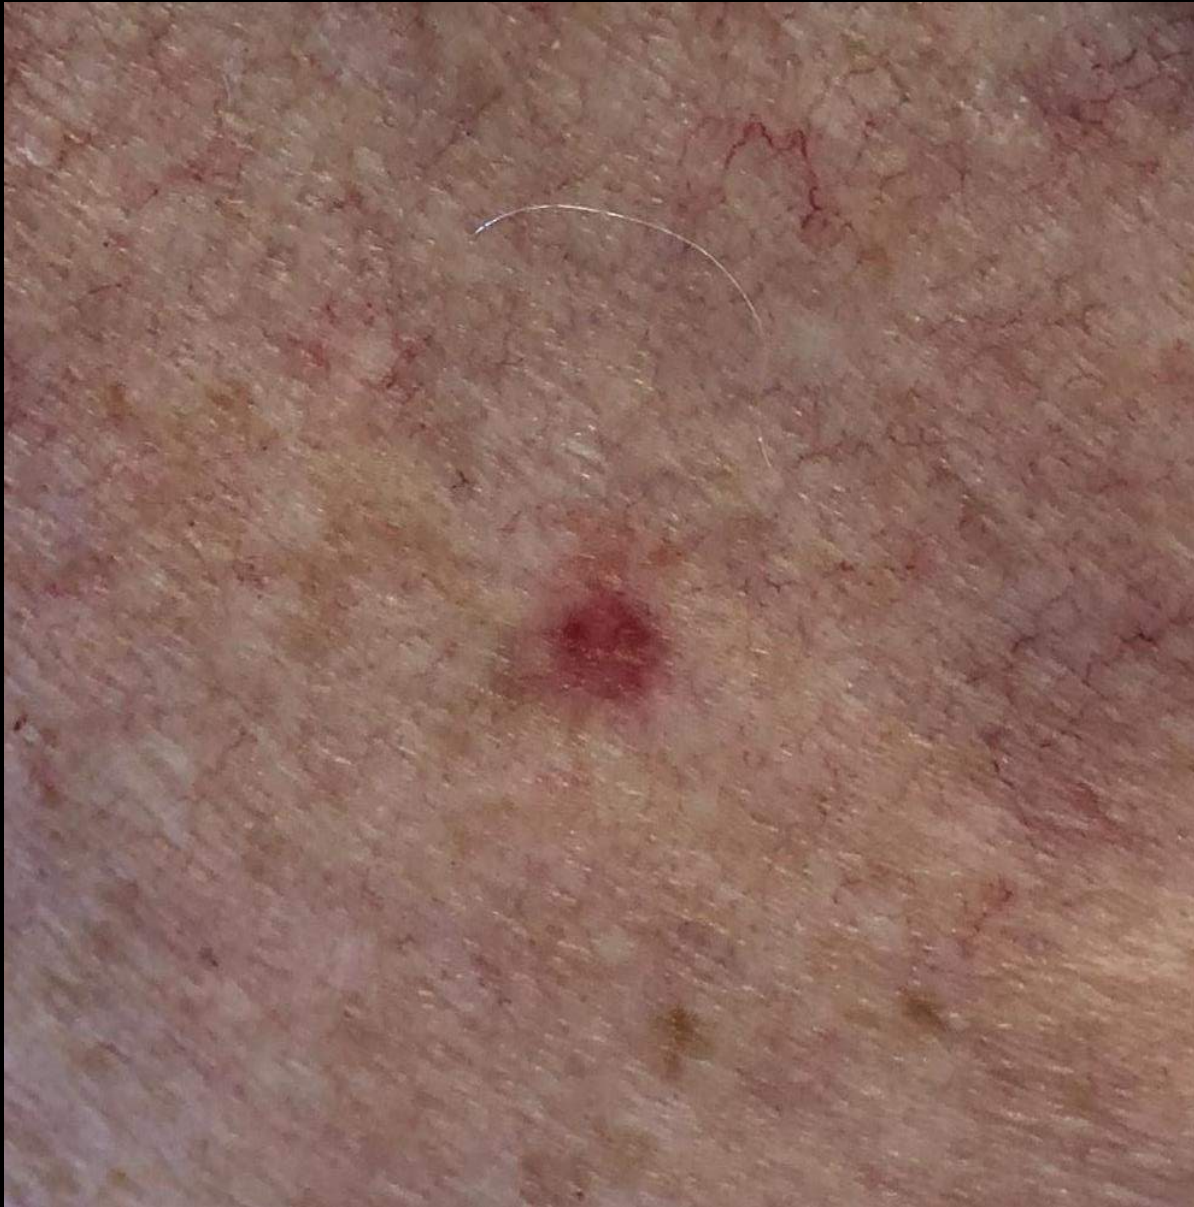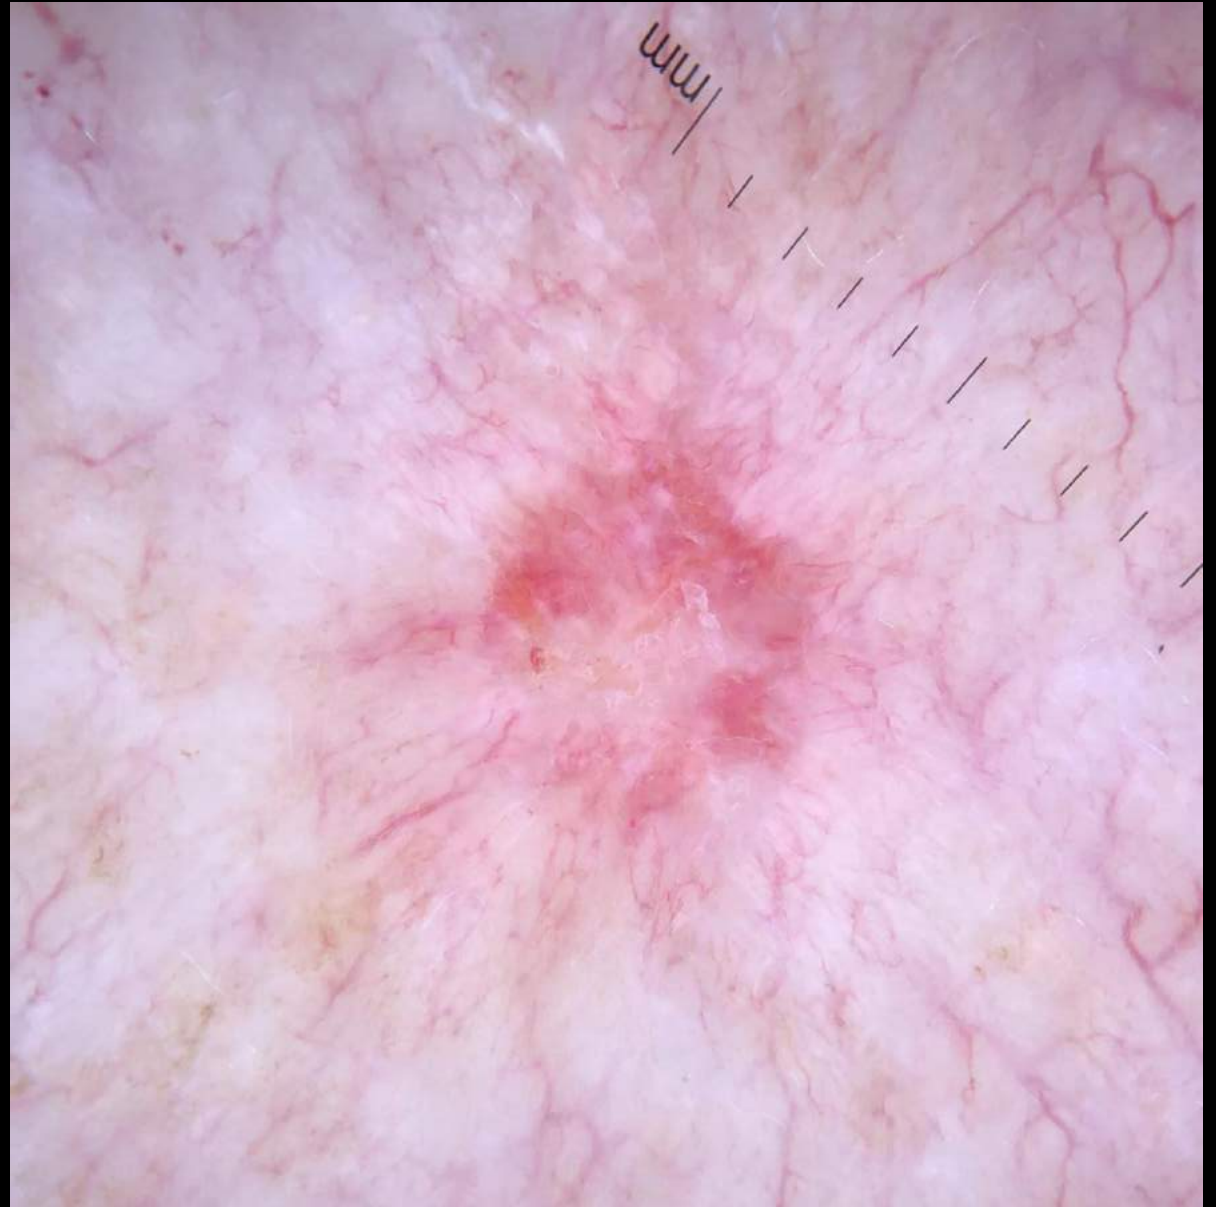

Case number 65



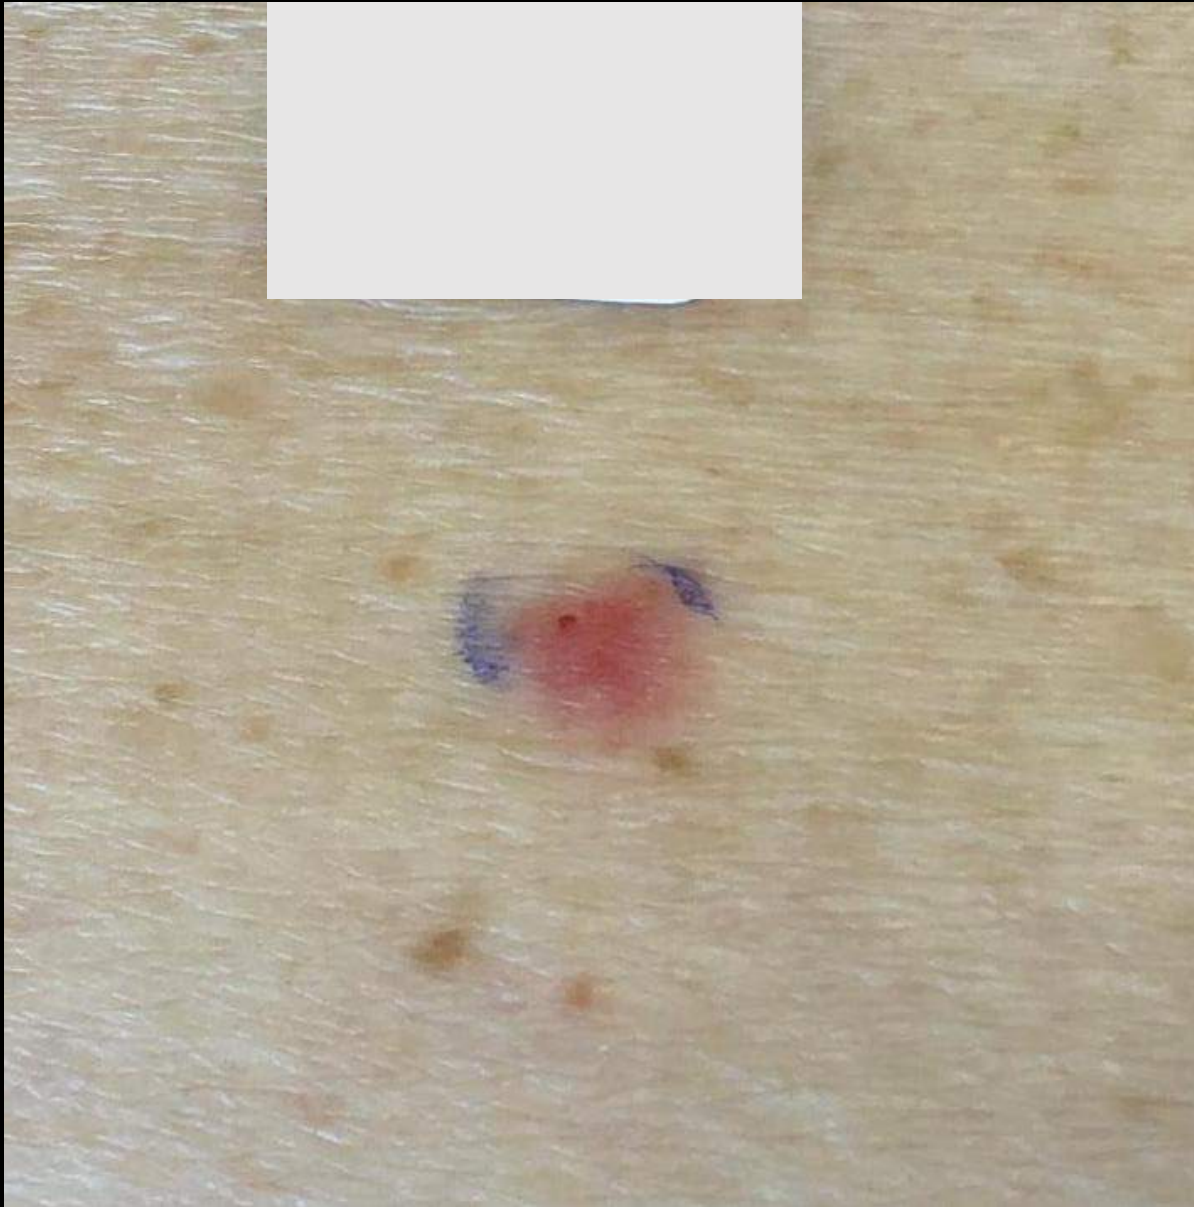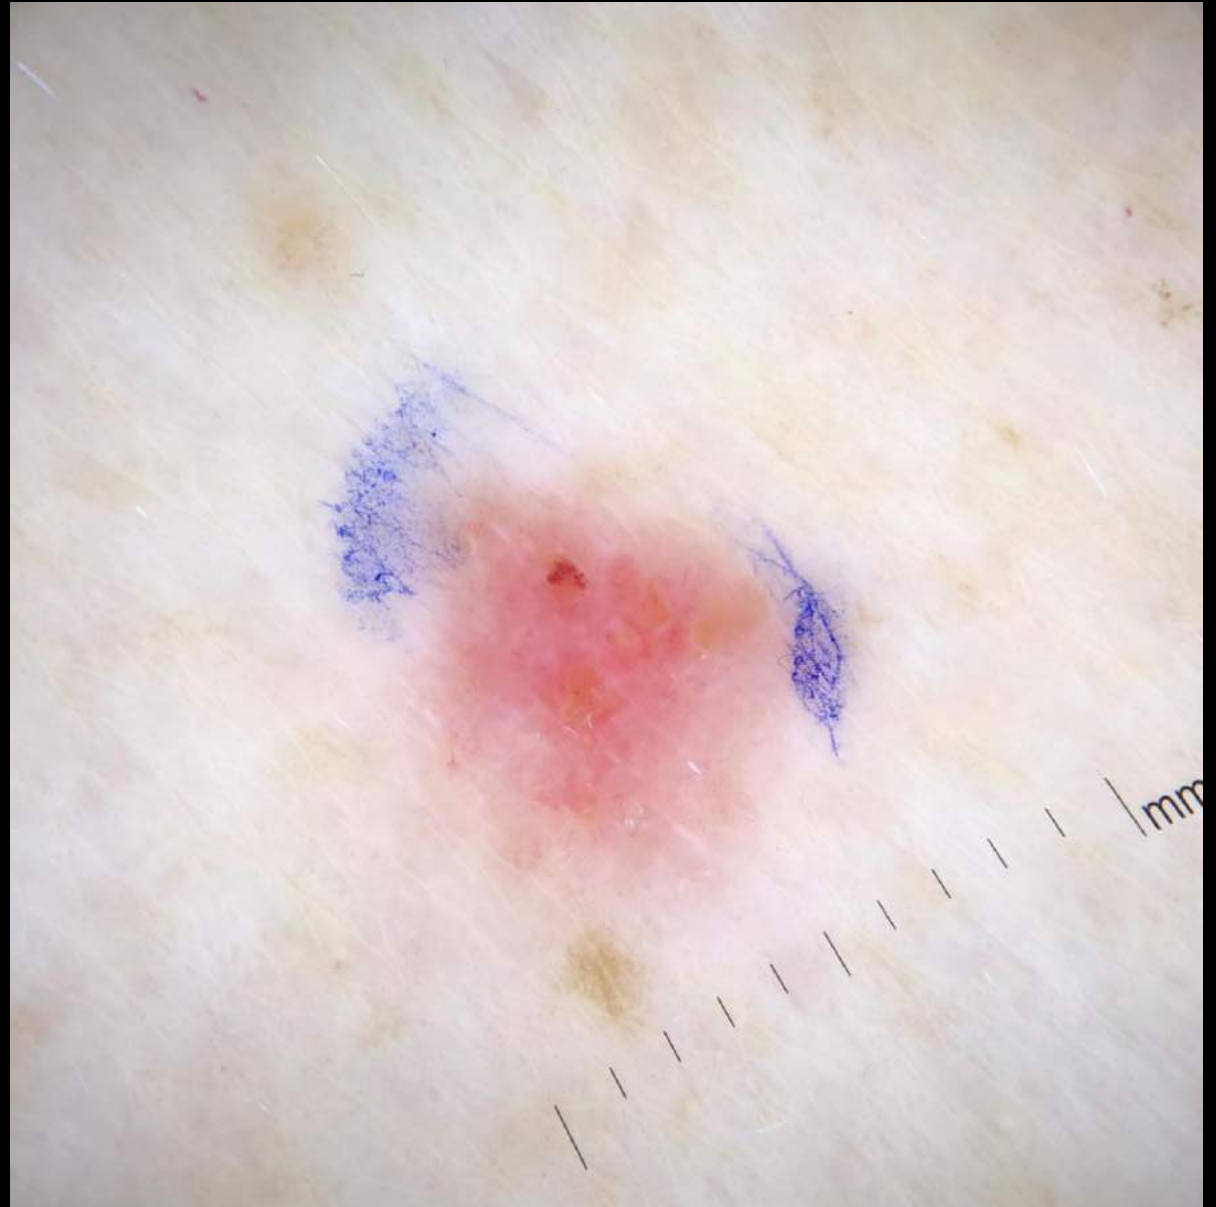

Case number 66



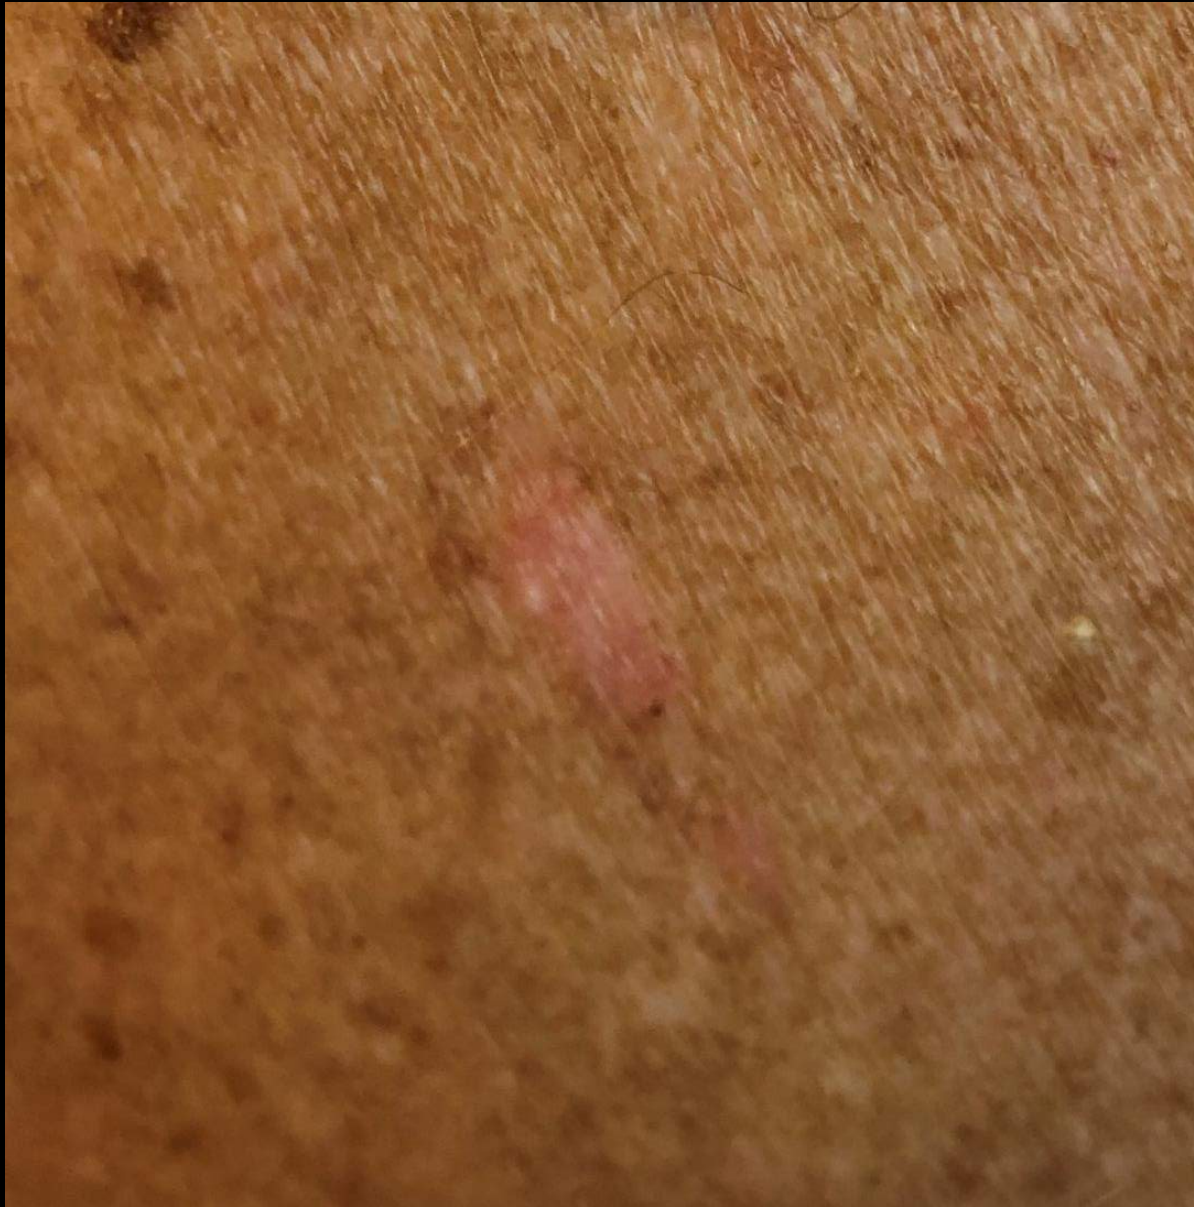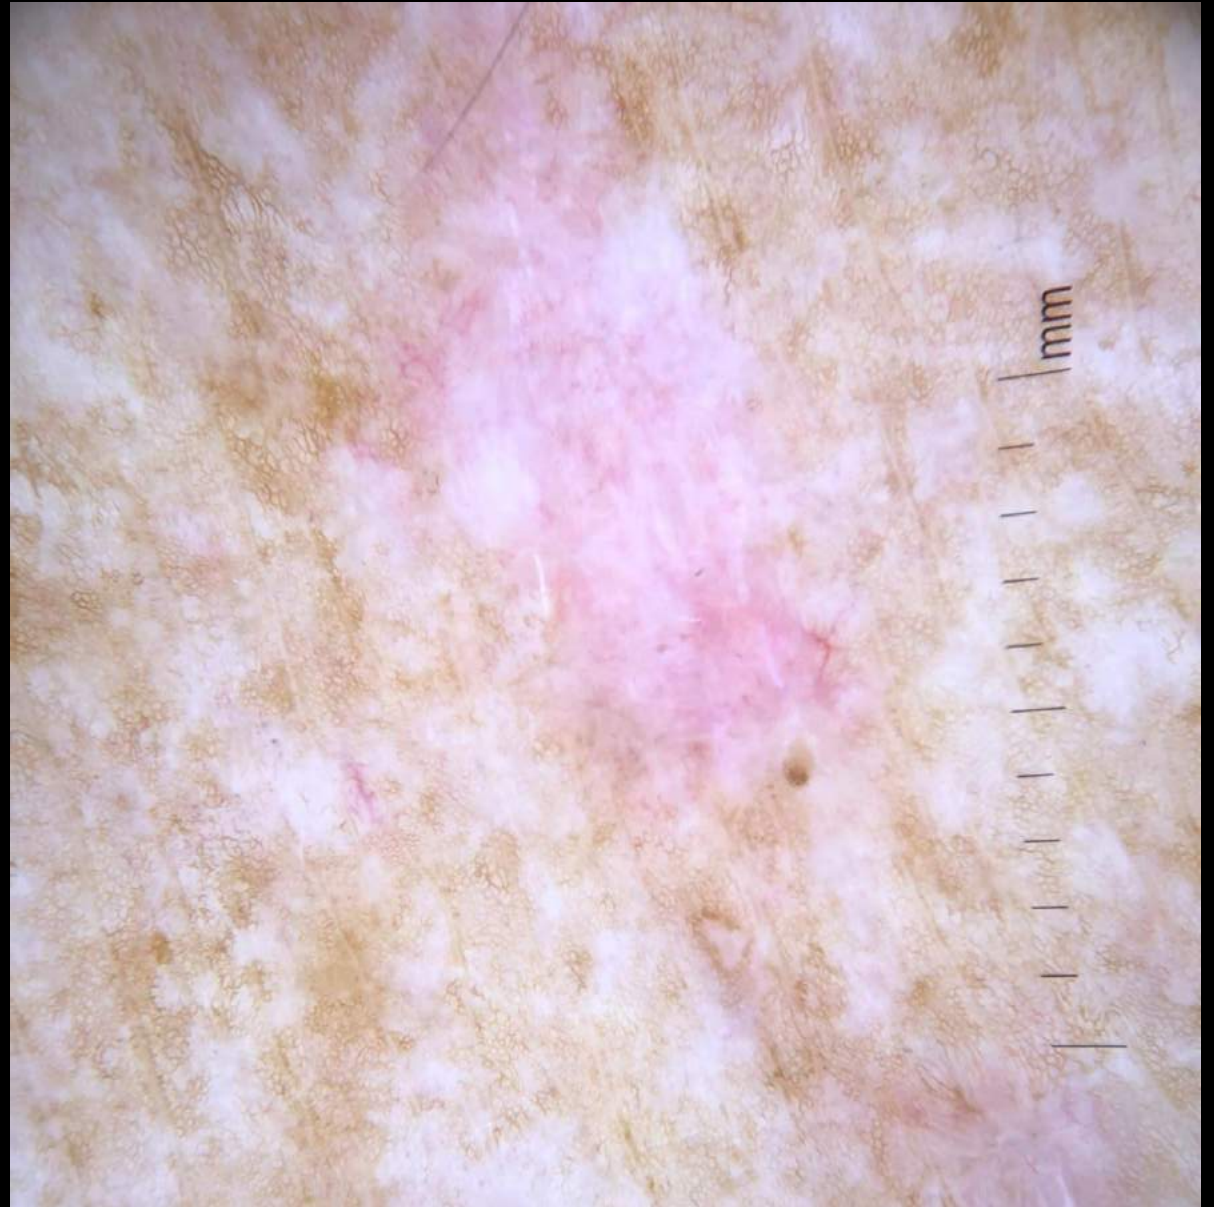

Case number 67



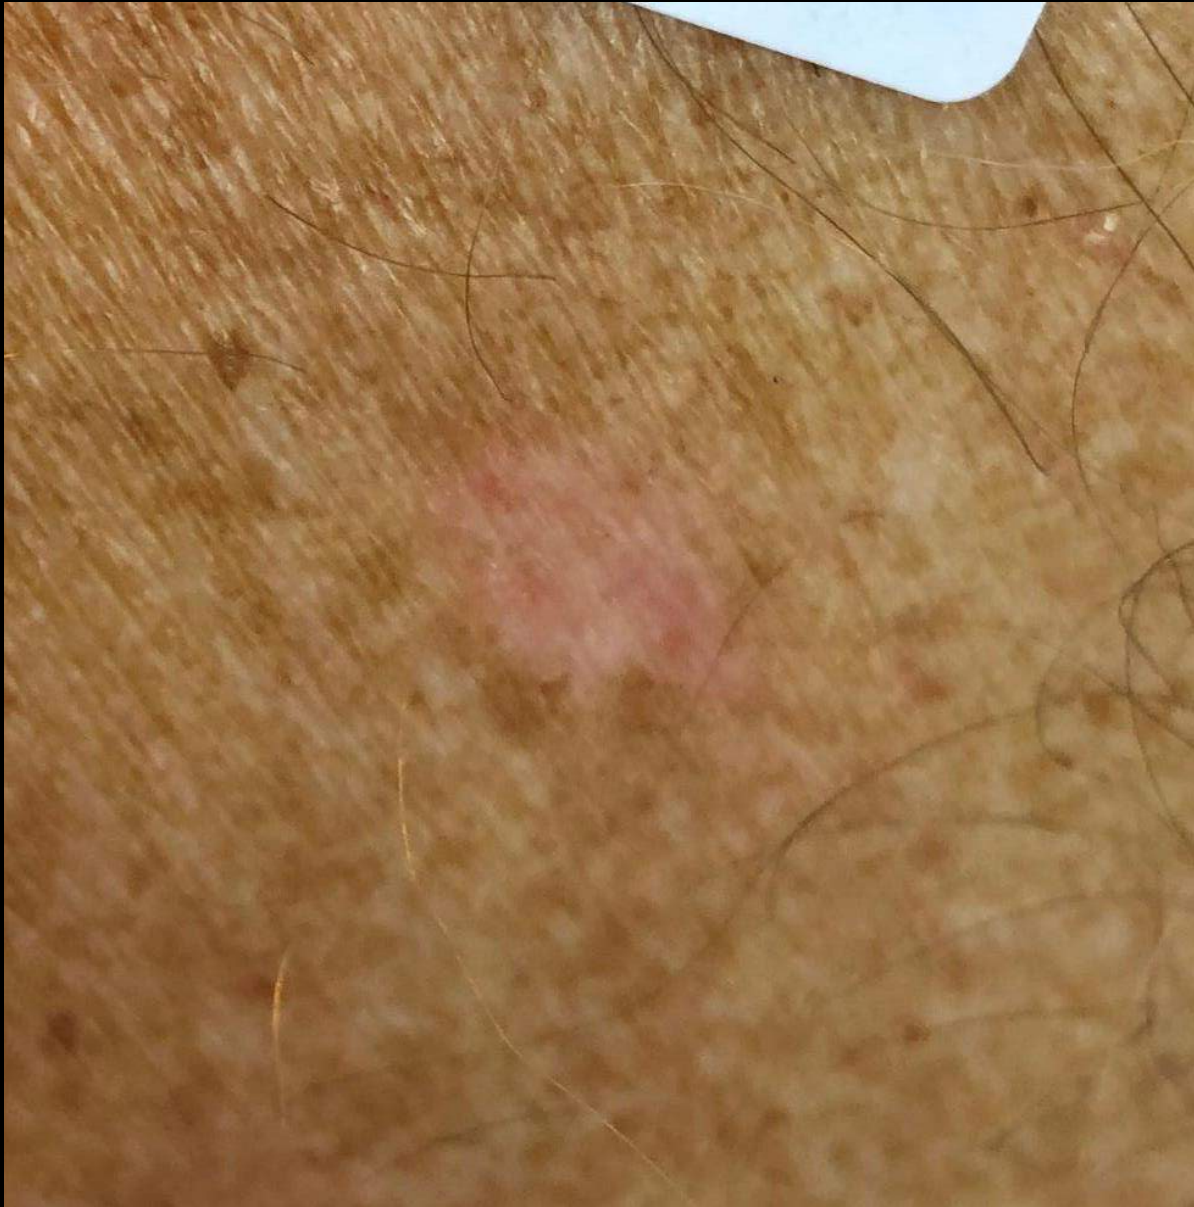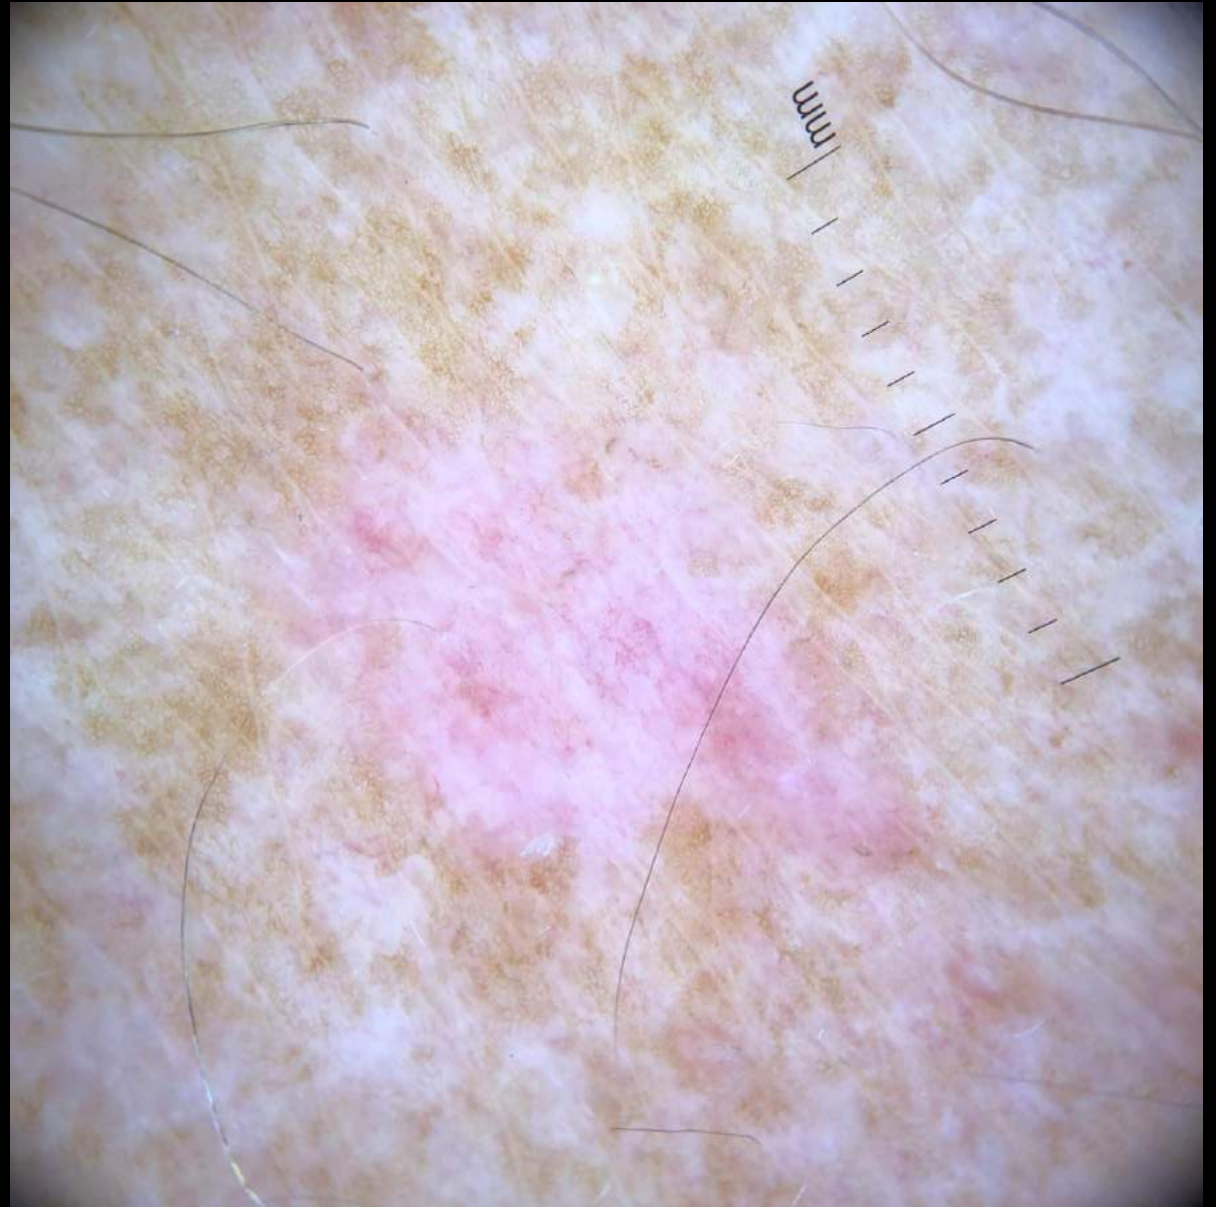

Case number 68



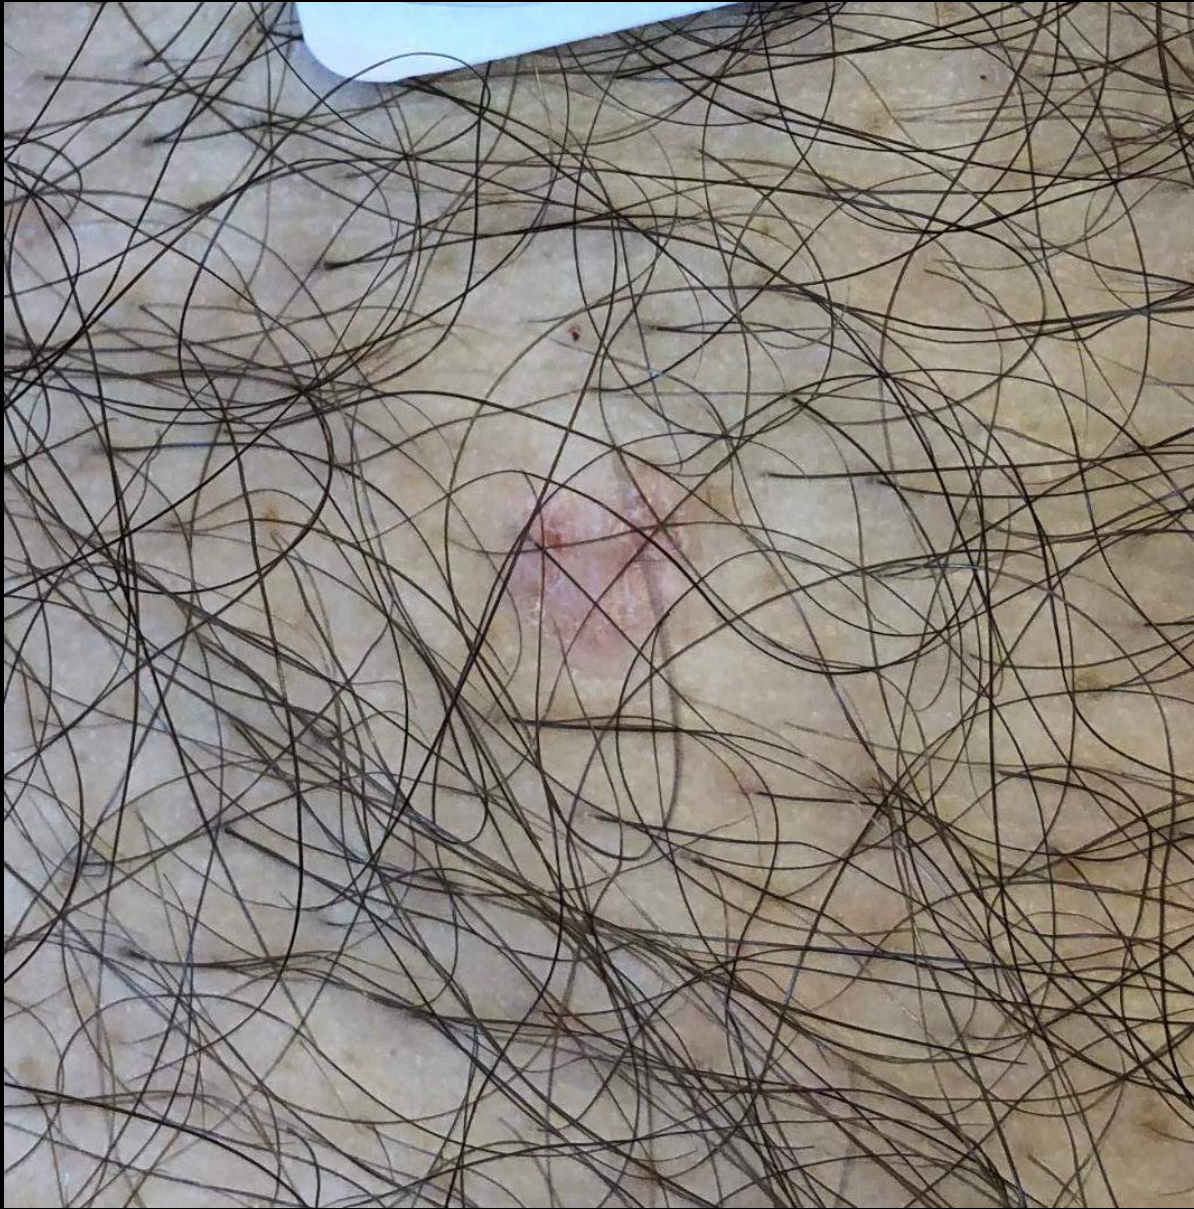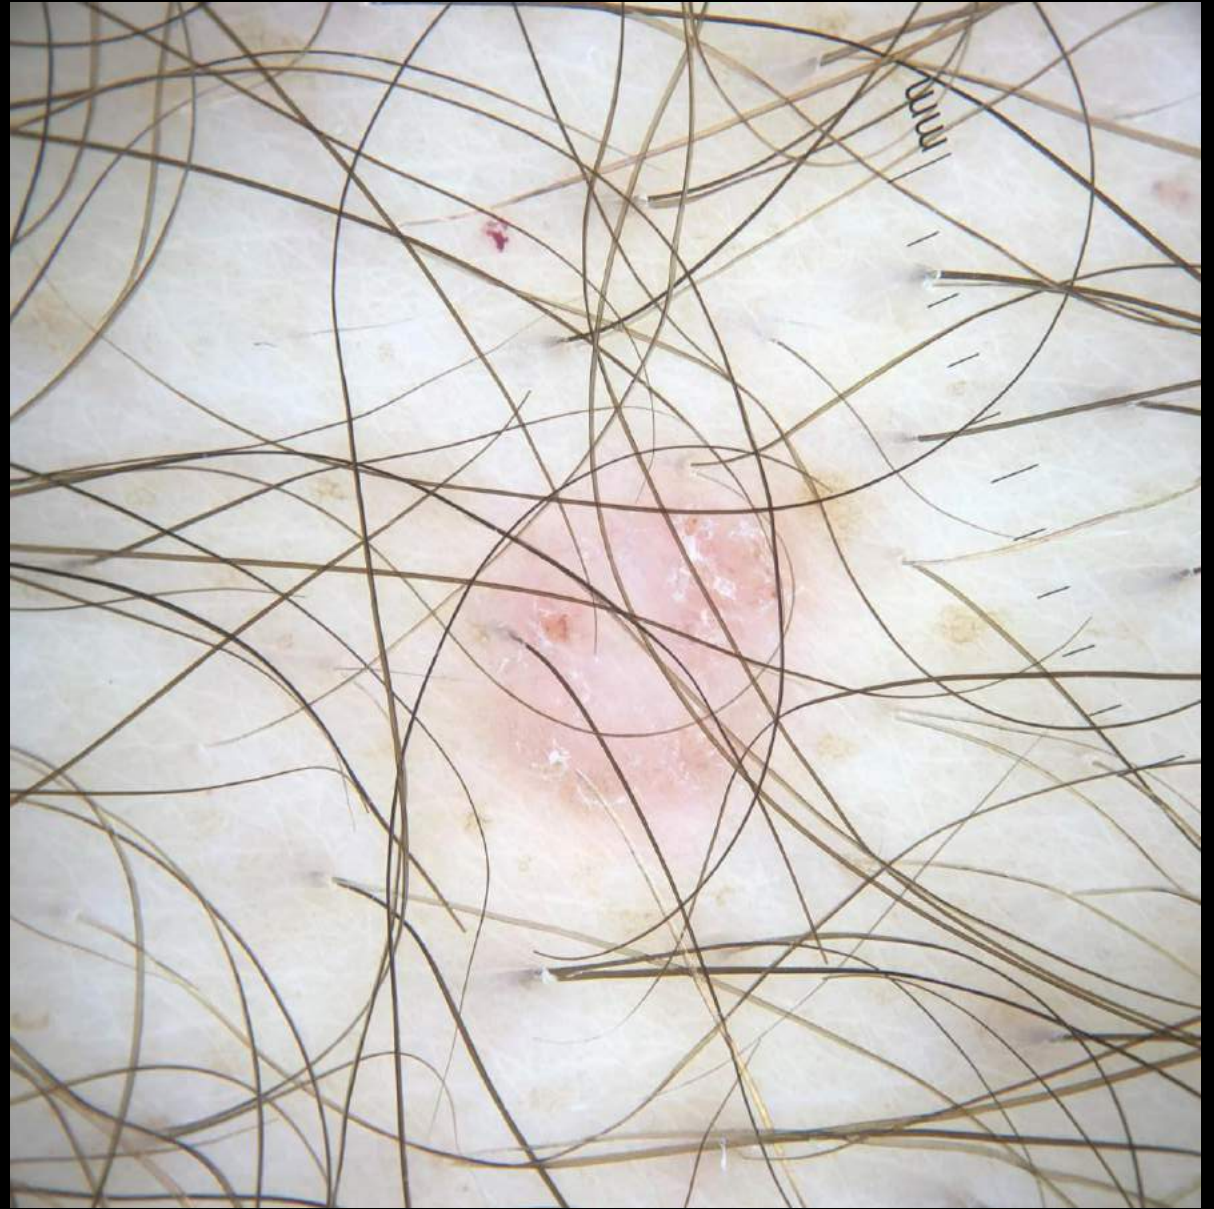

Case number 69



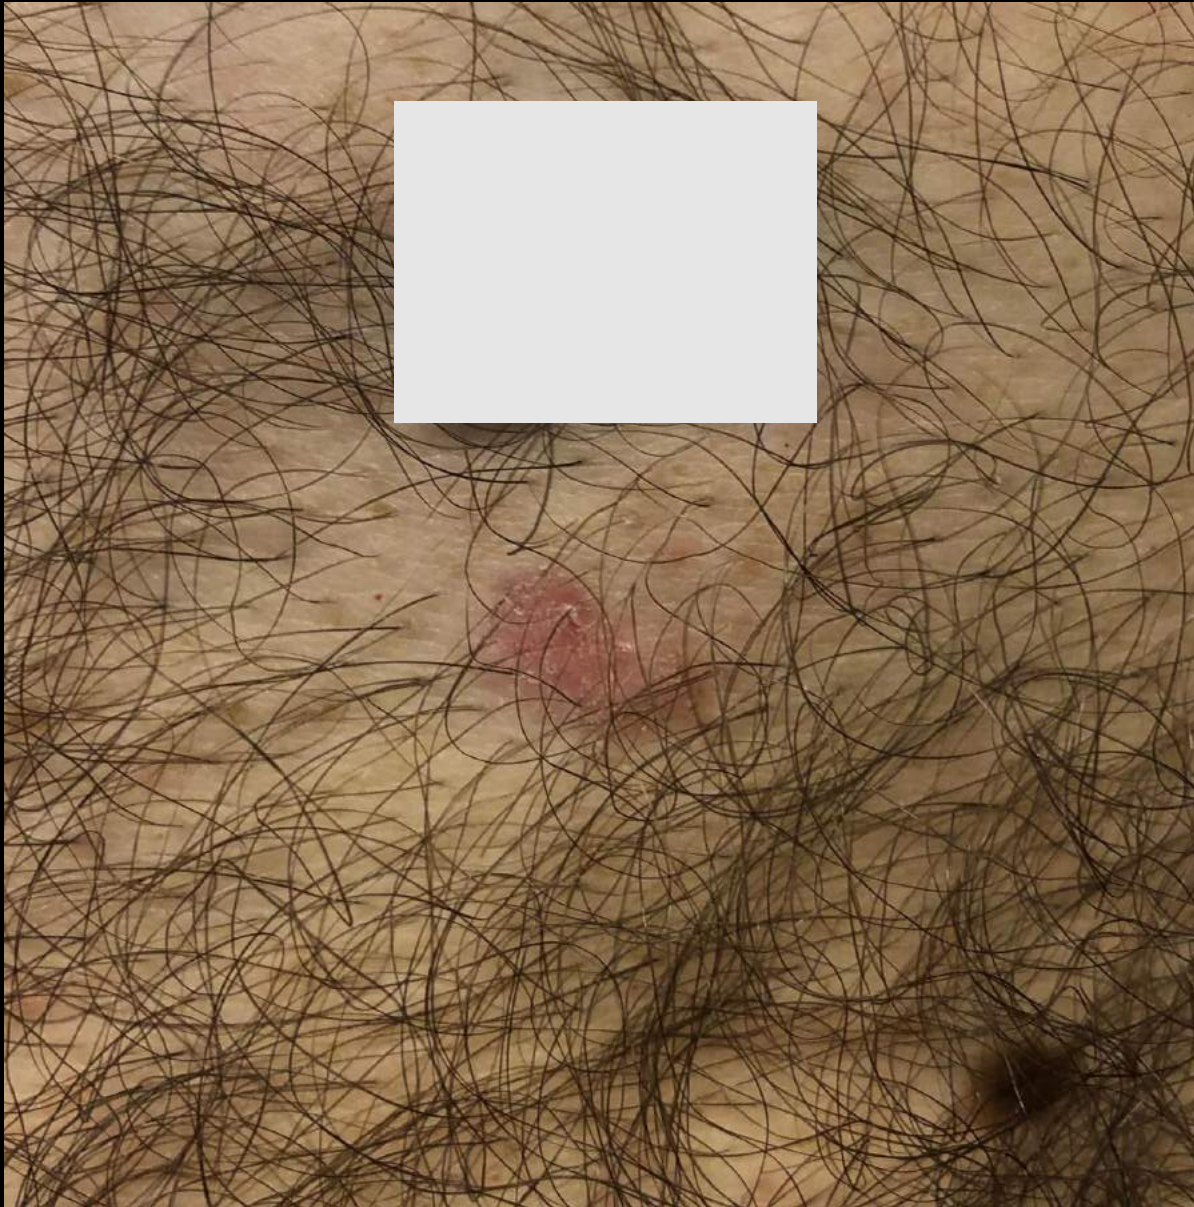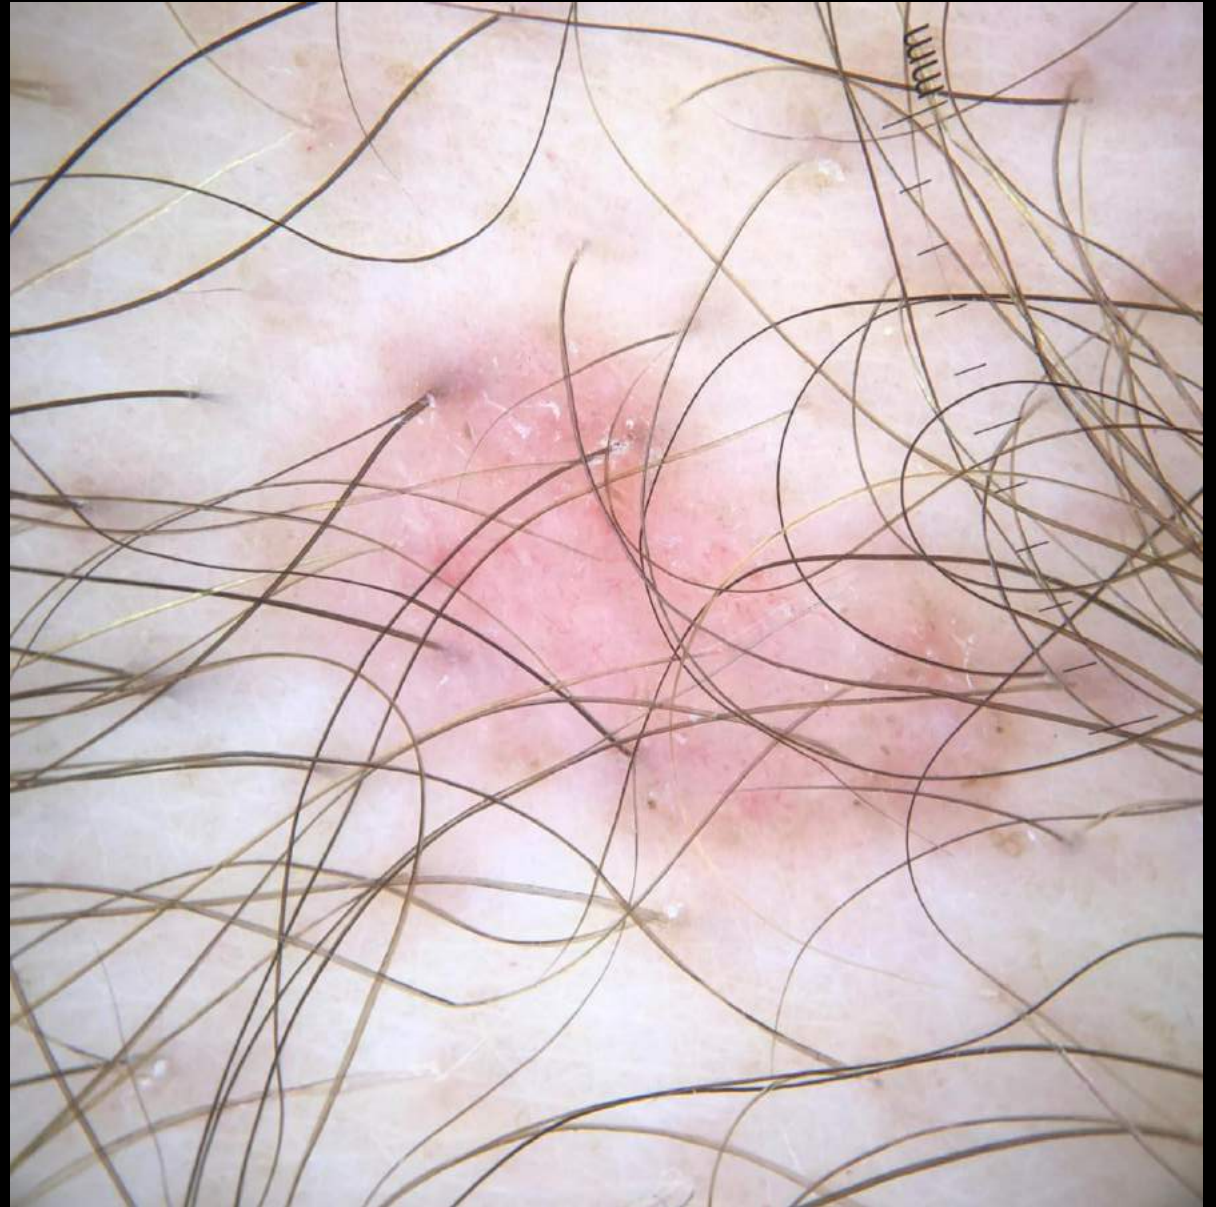

Case number 70



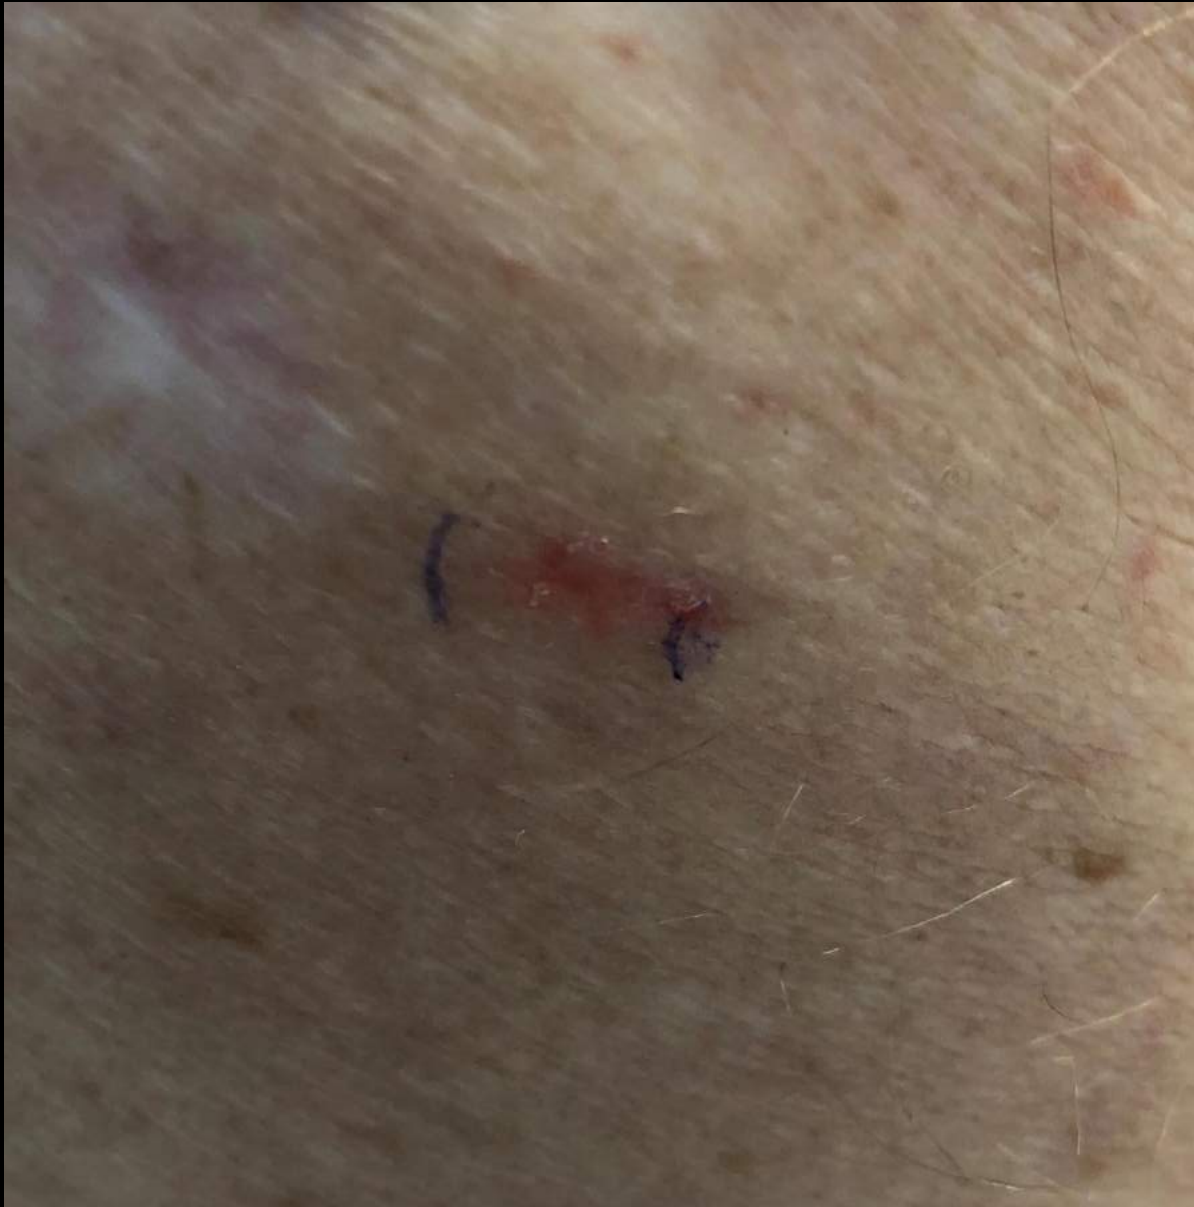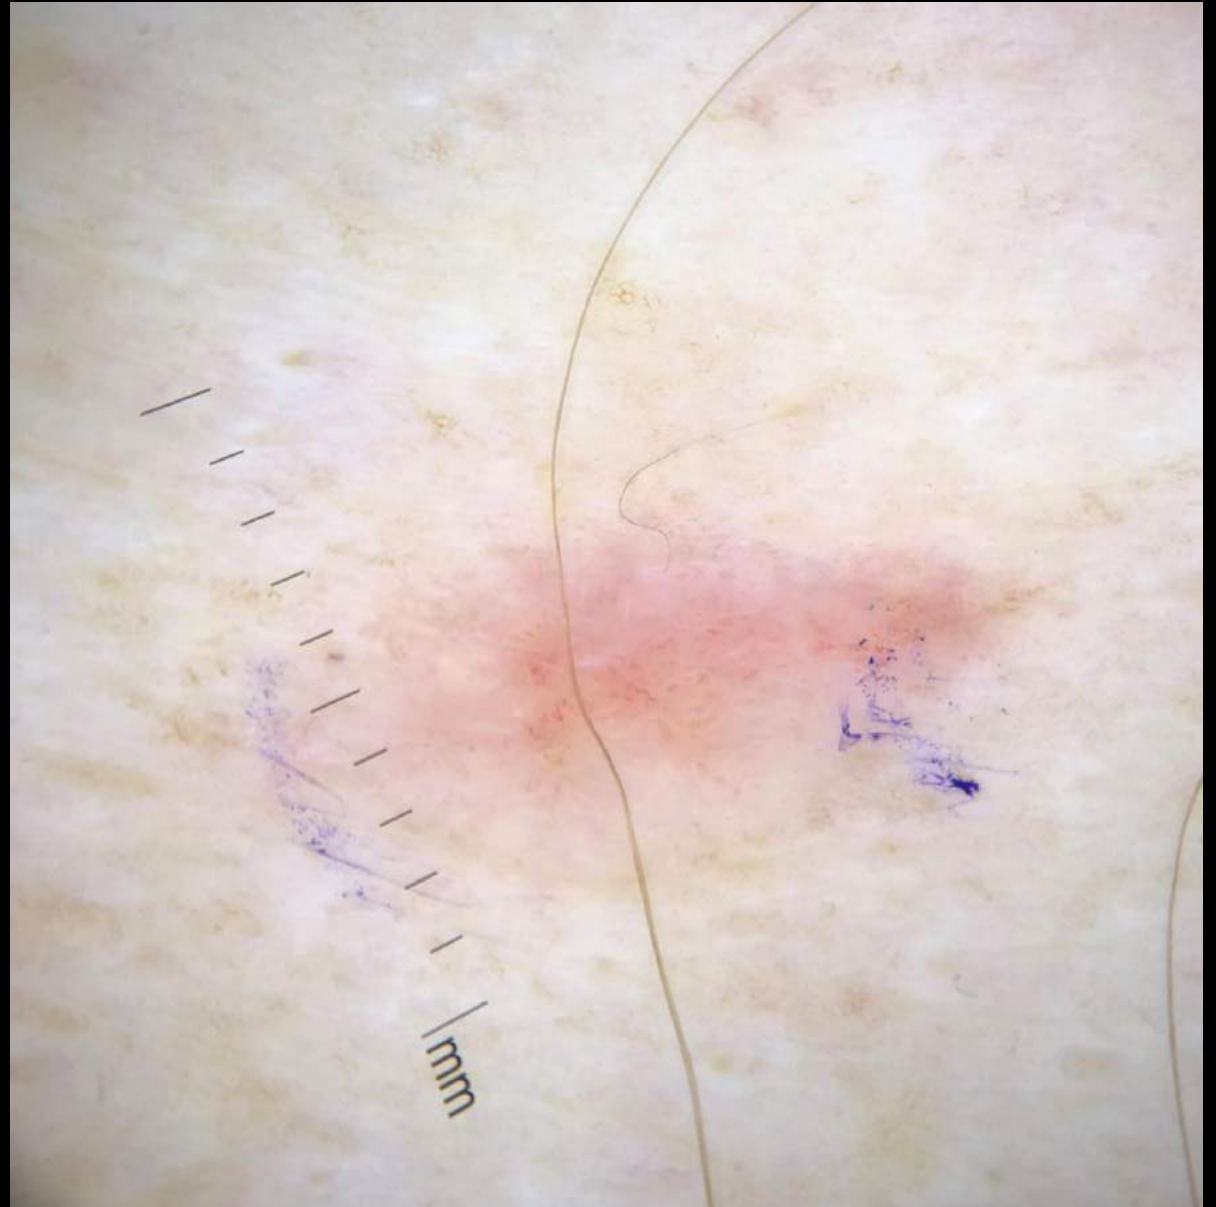

Case number 71



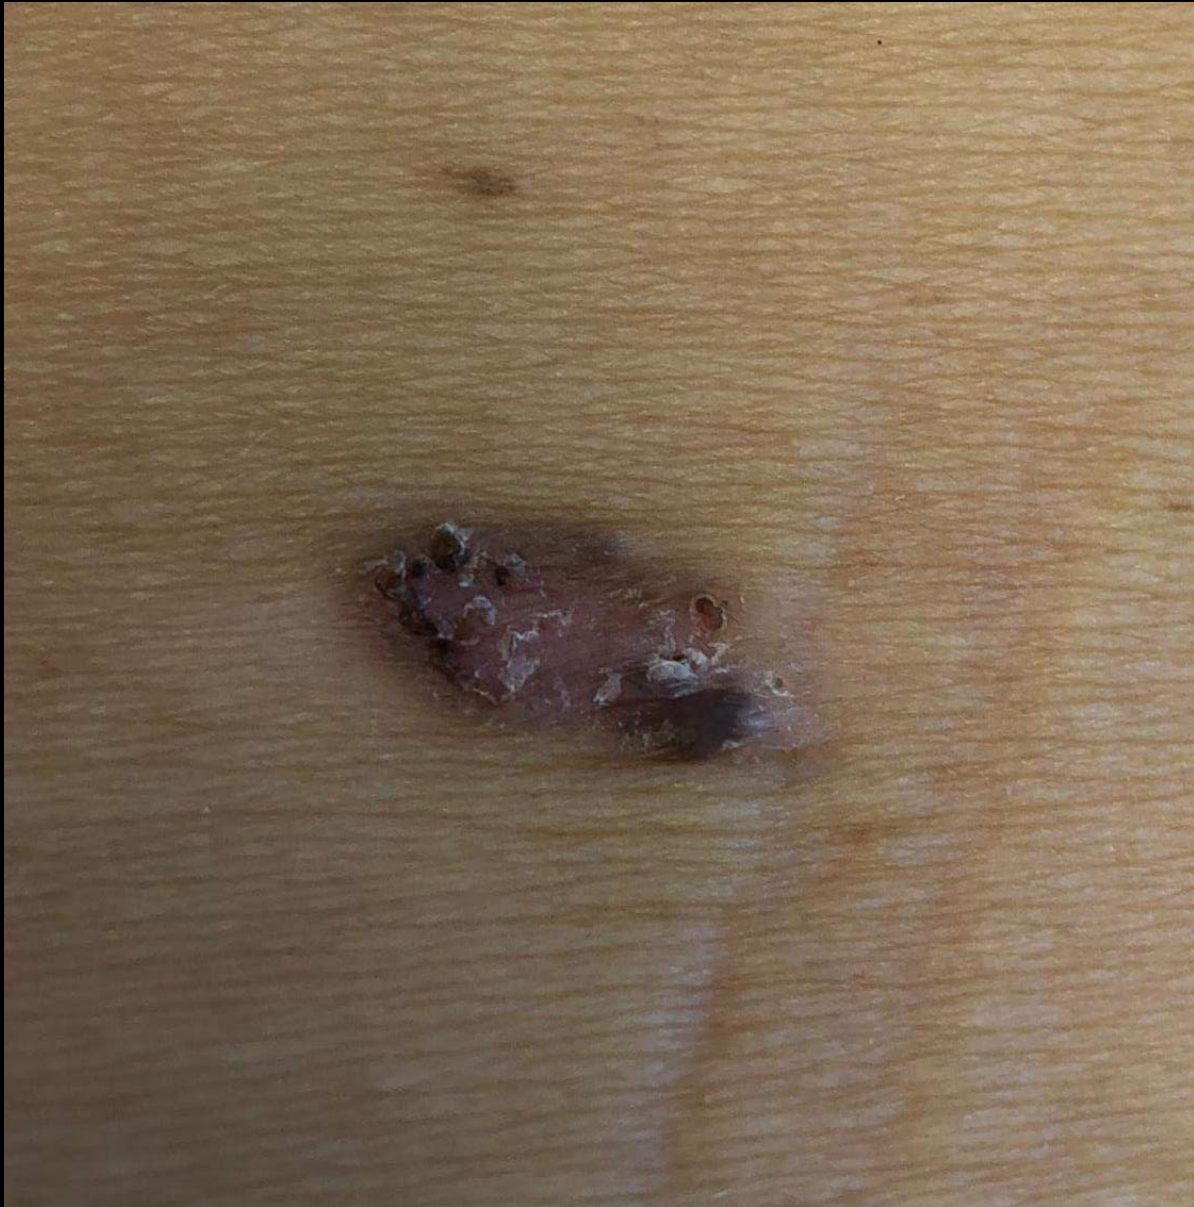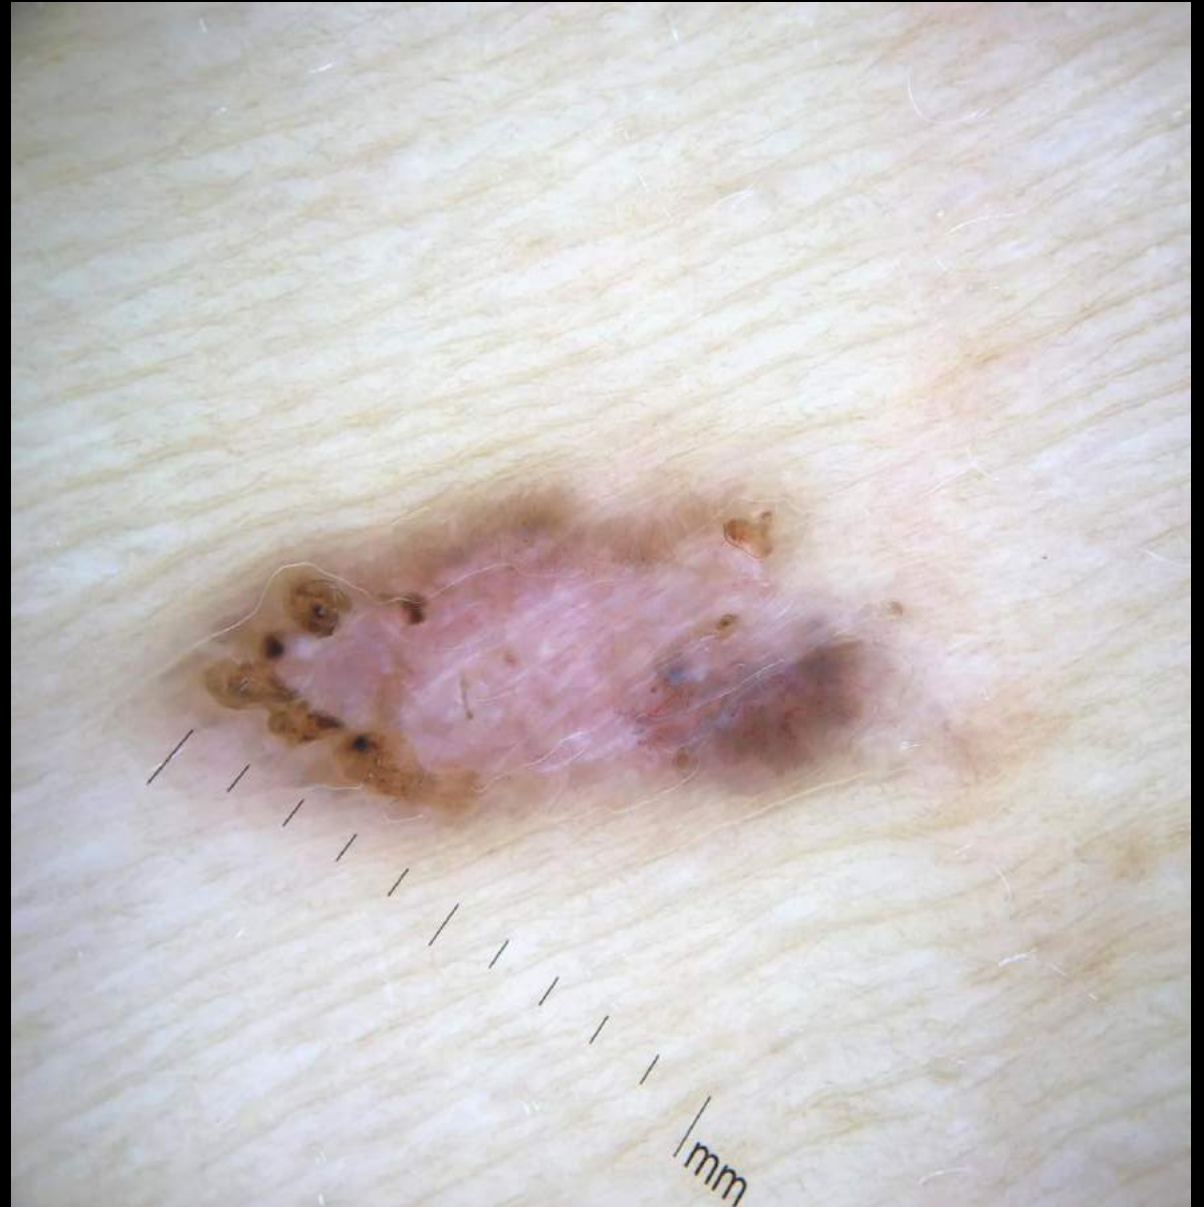

Case number 72



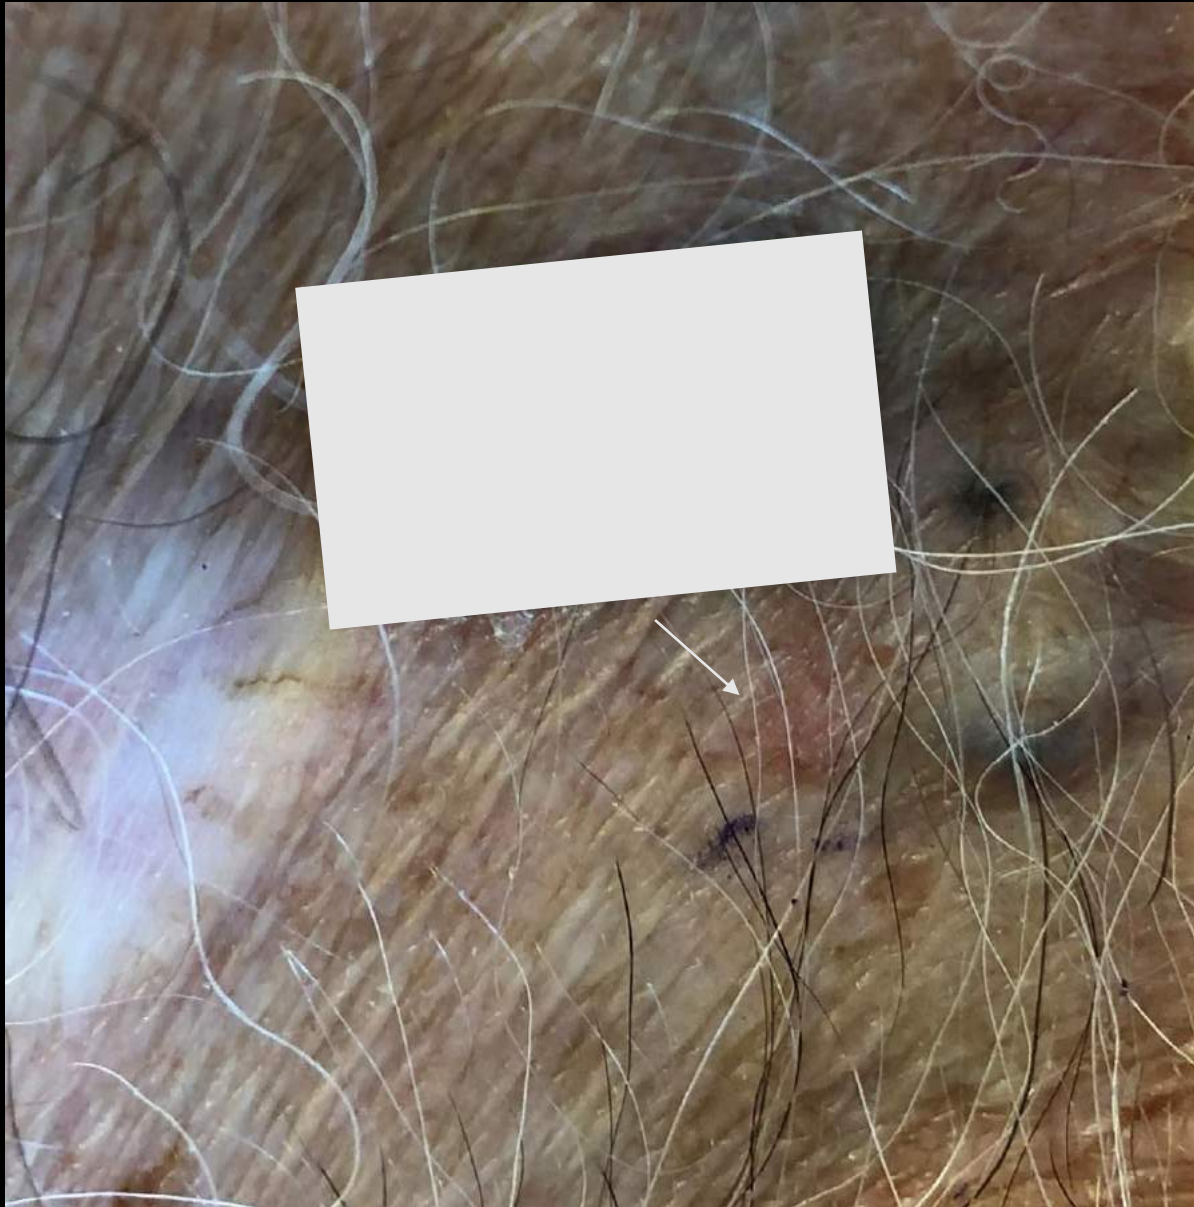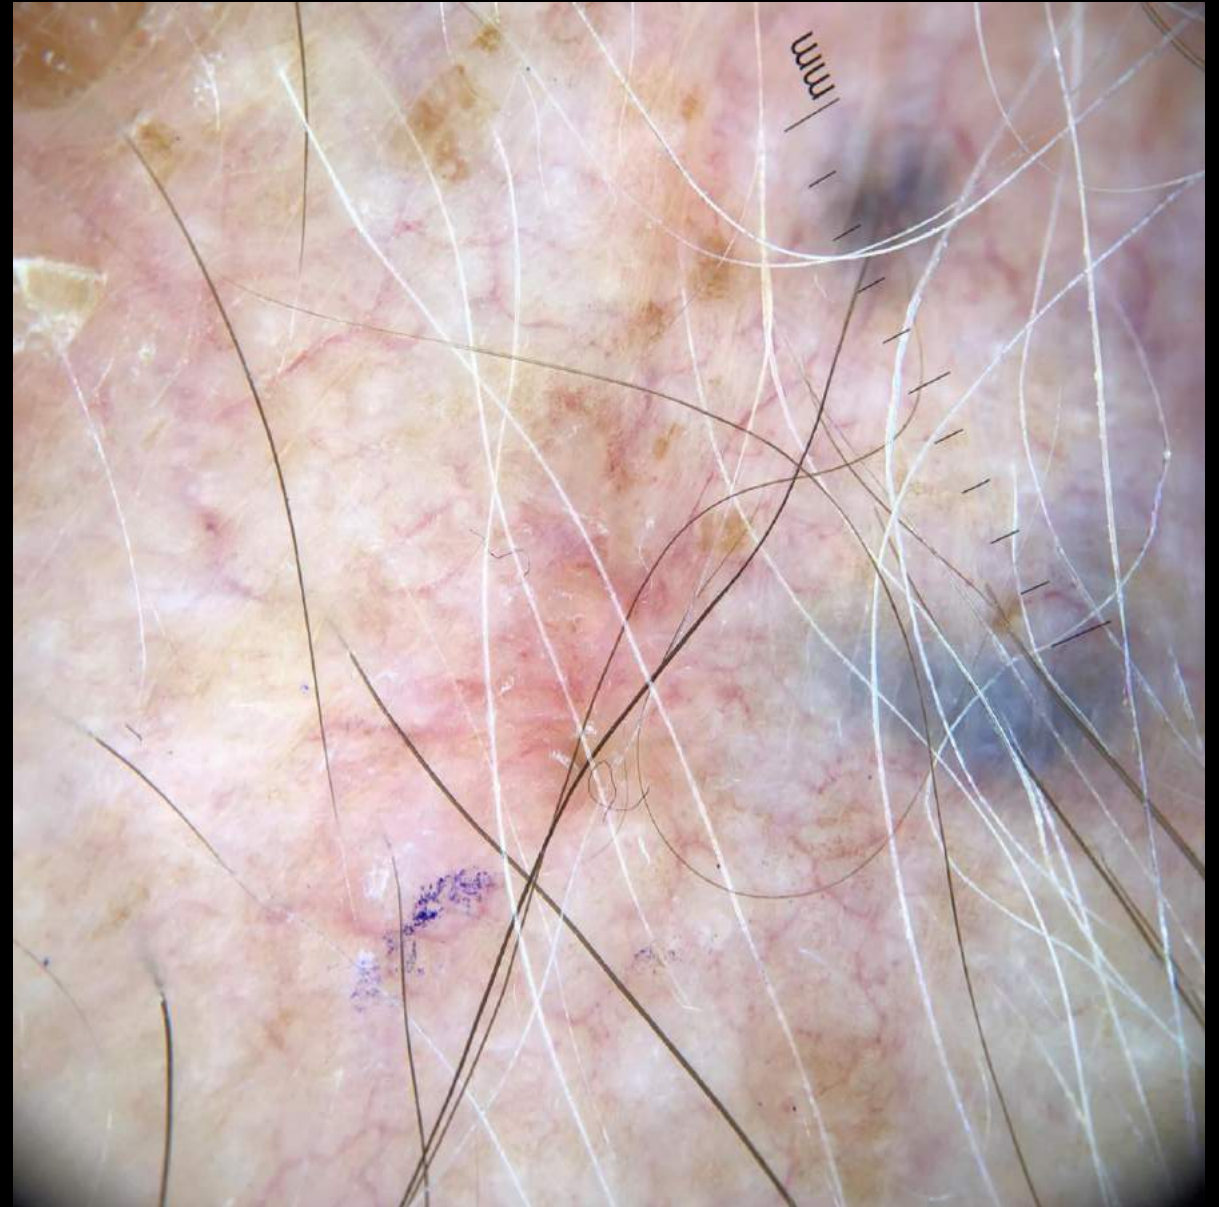

Case number 73



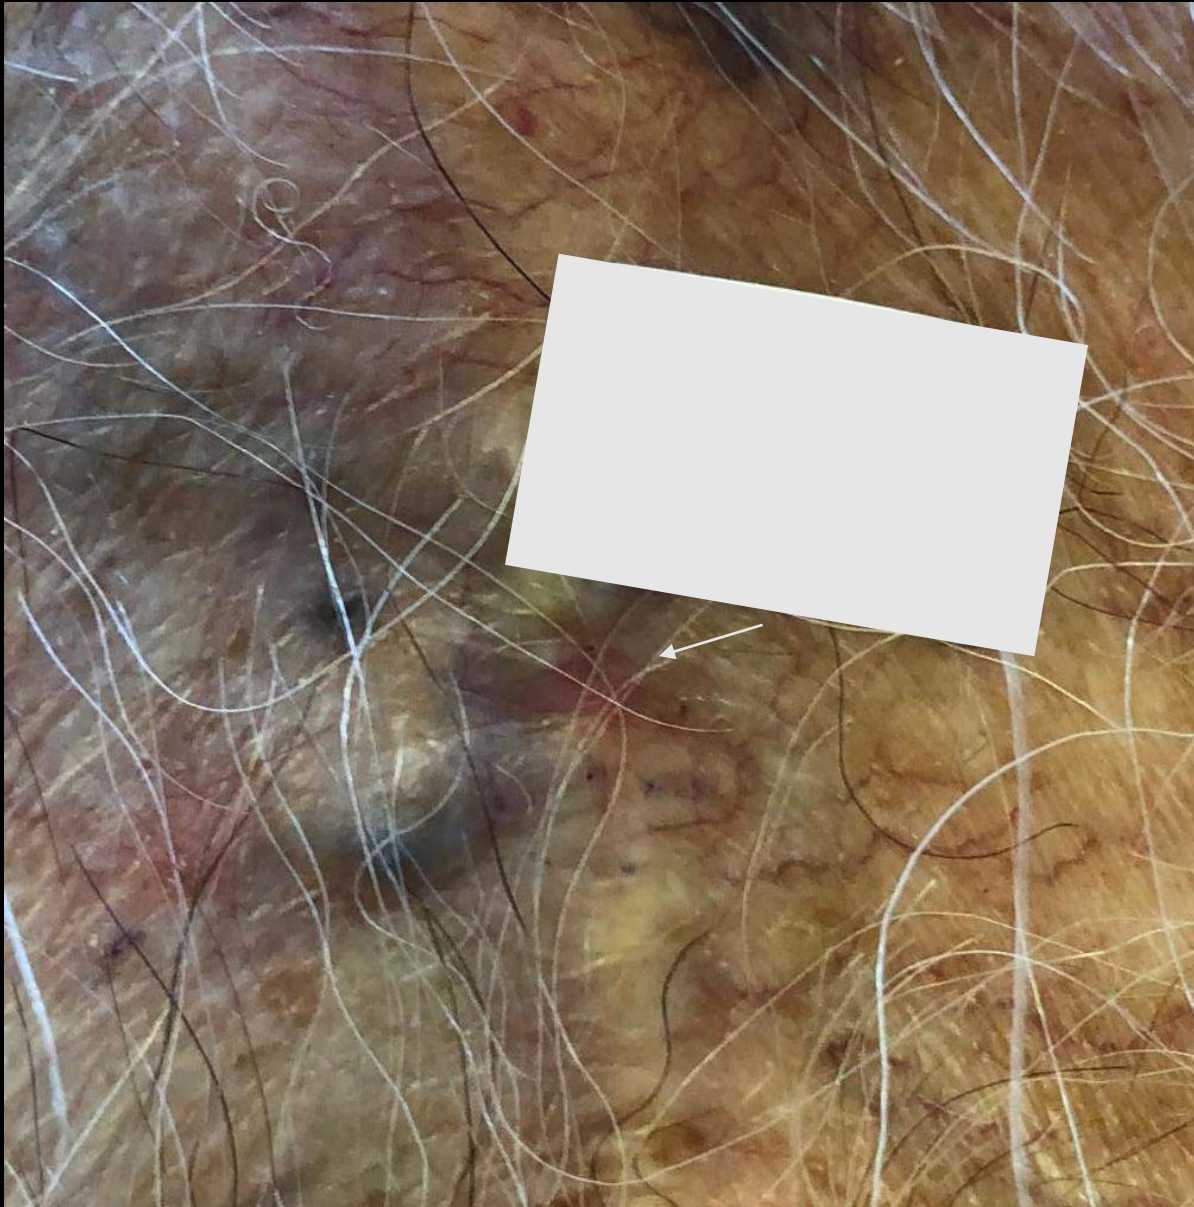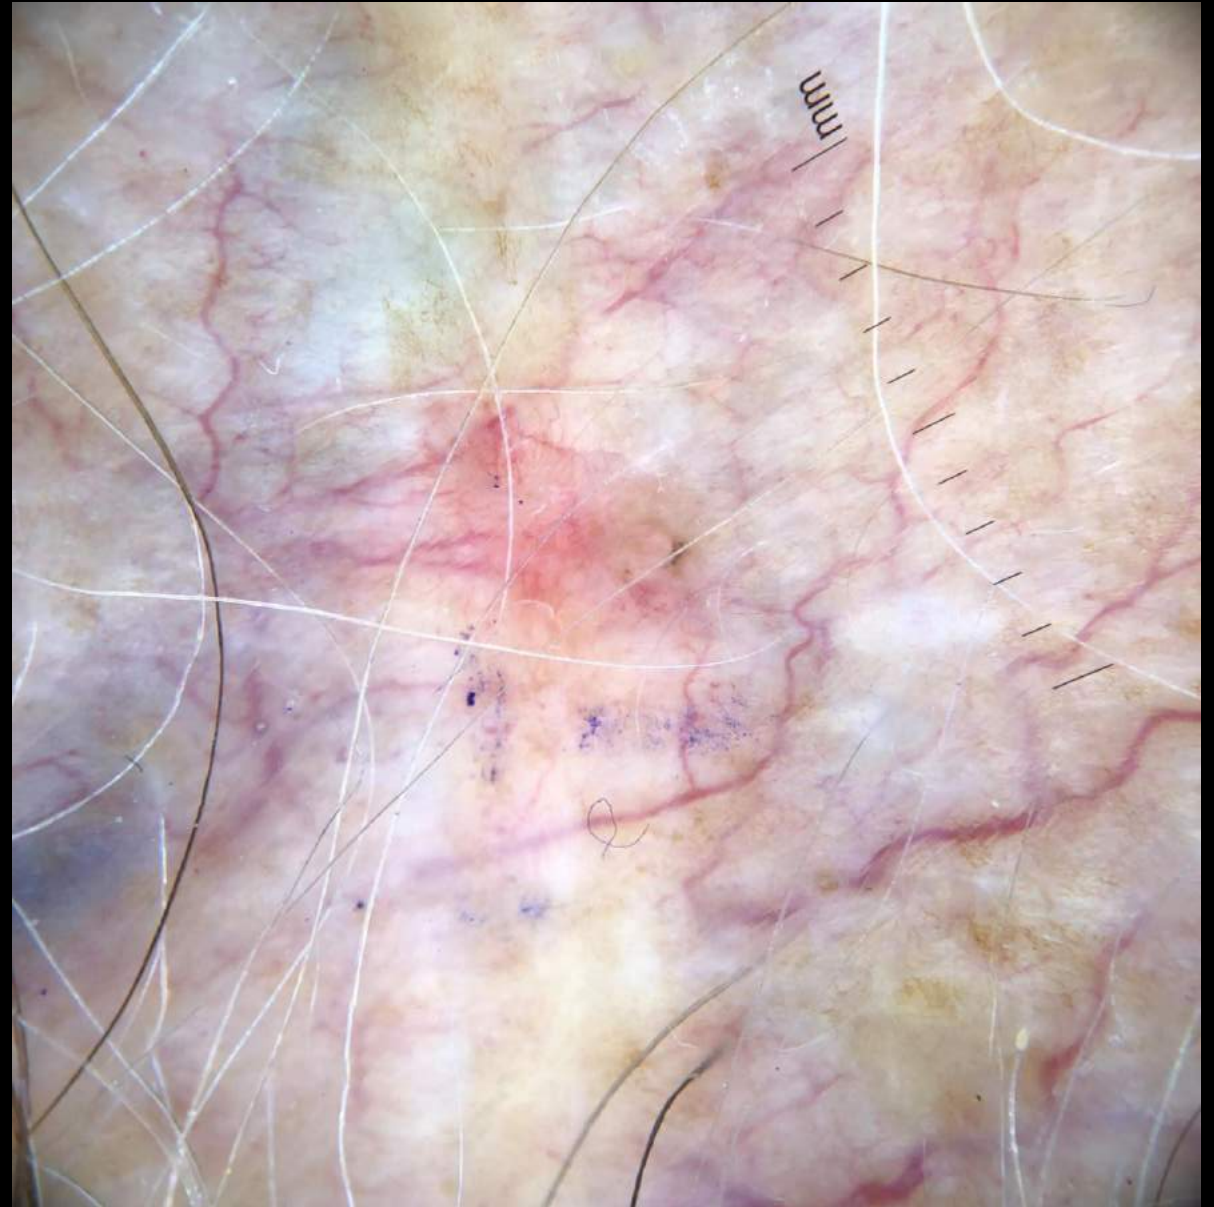

Case number 74



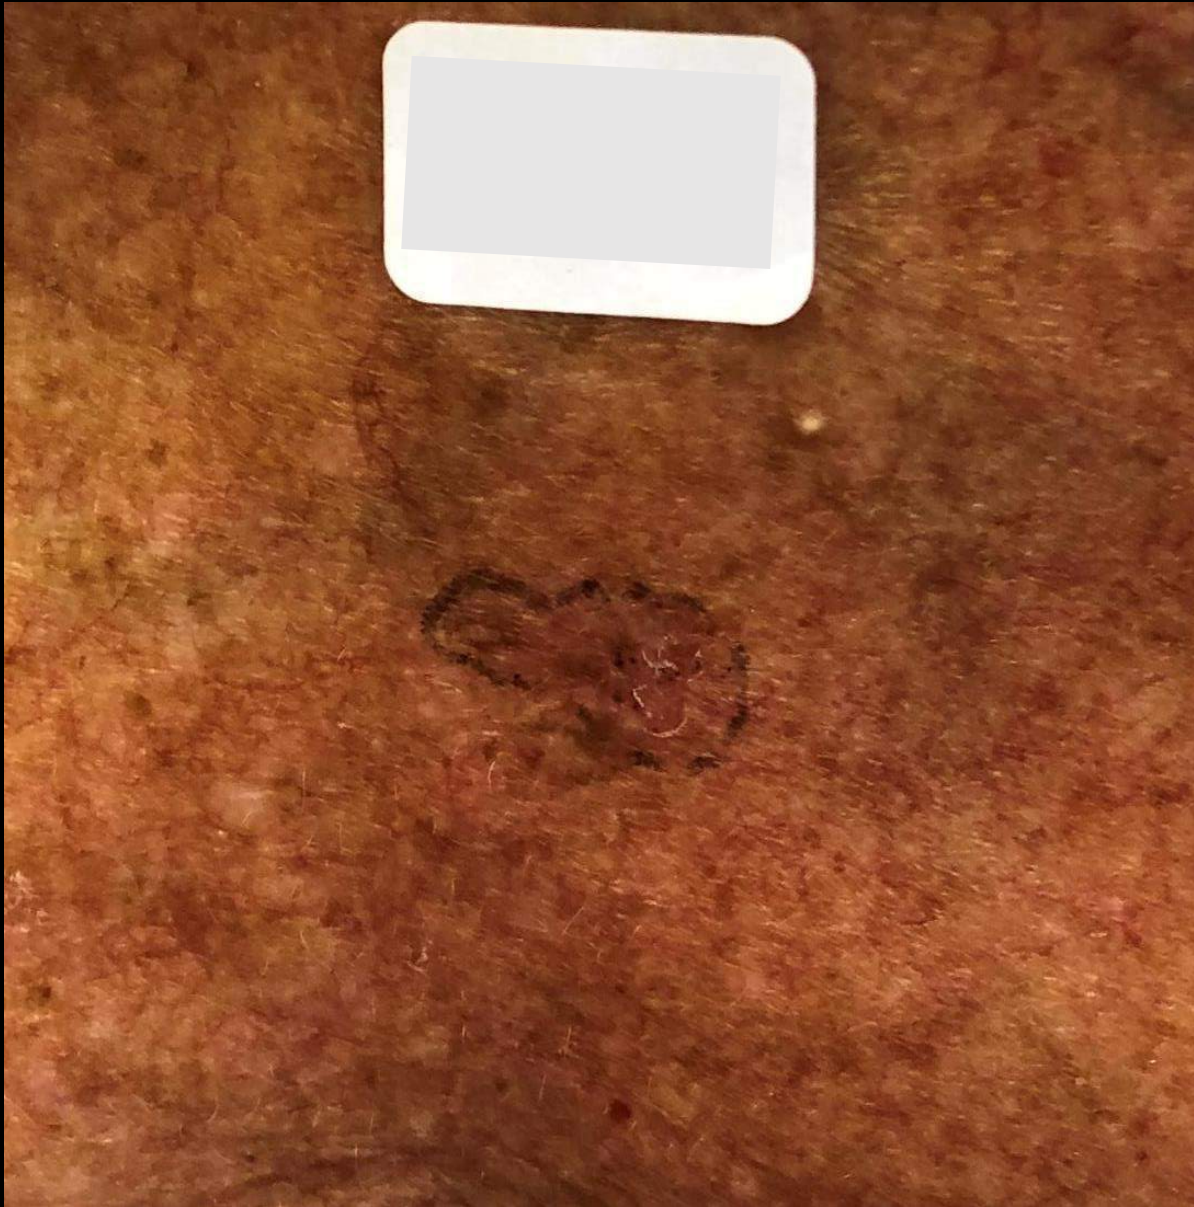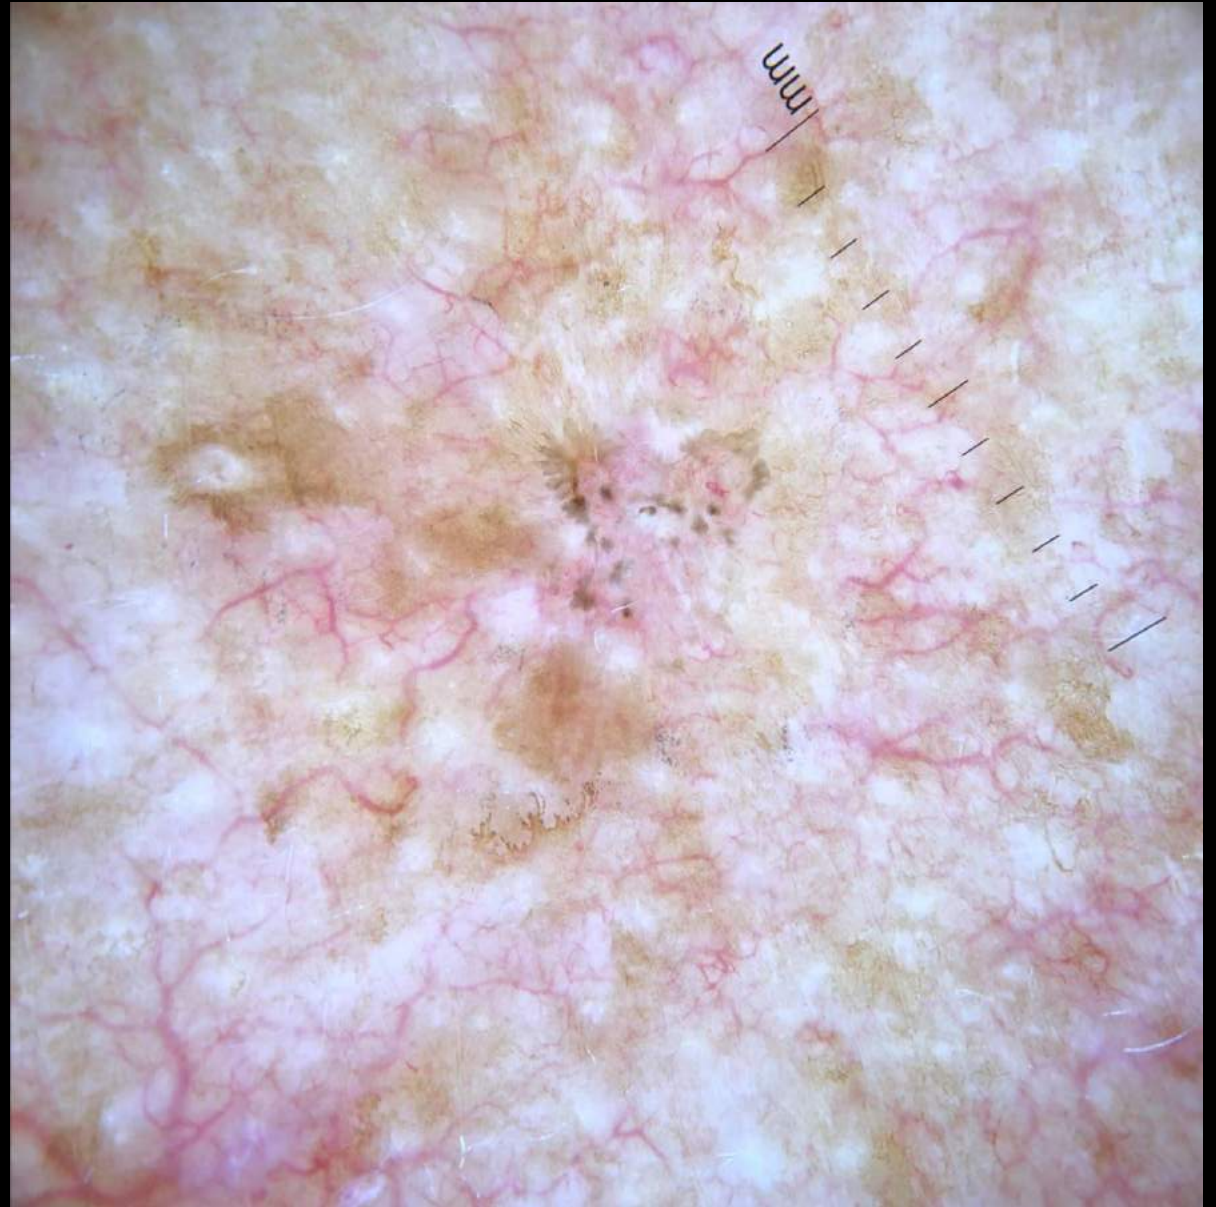

Case number 75



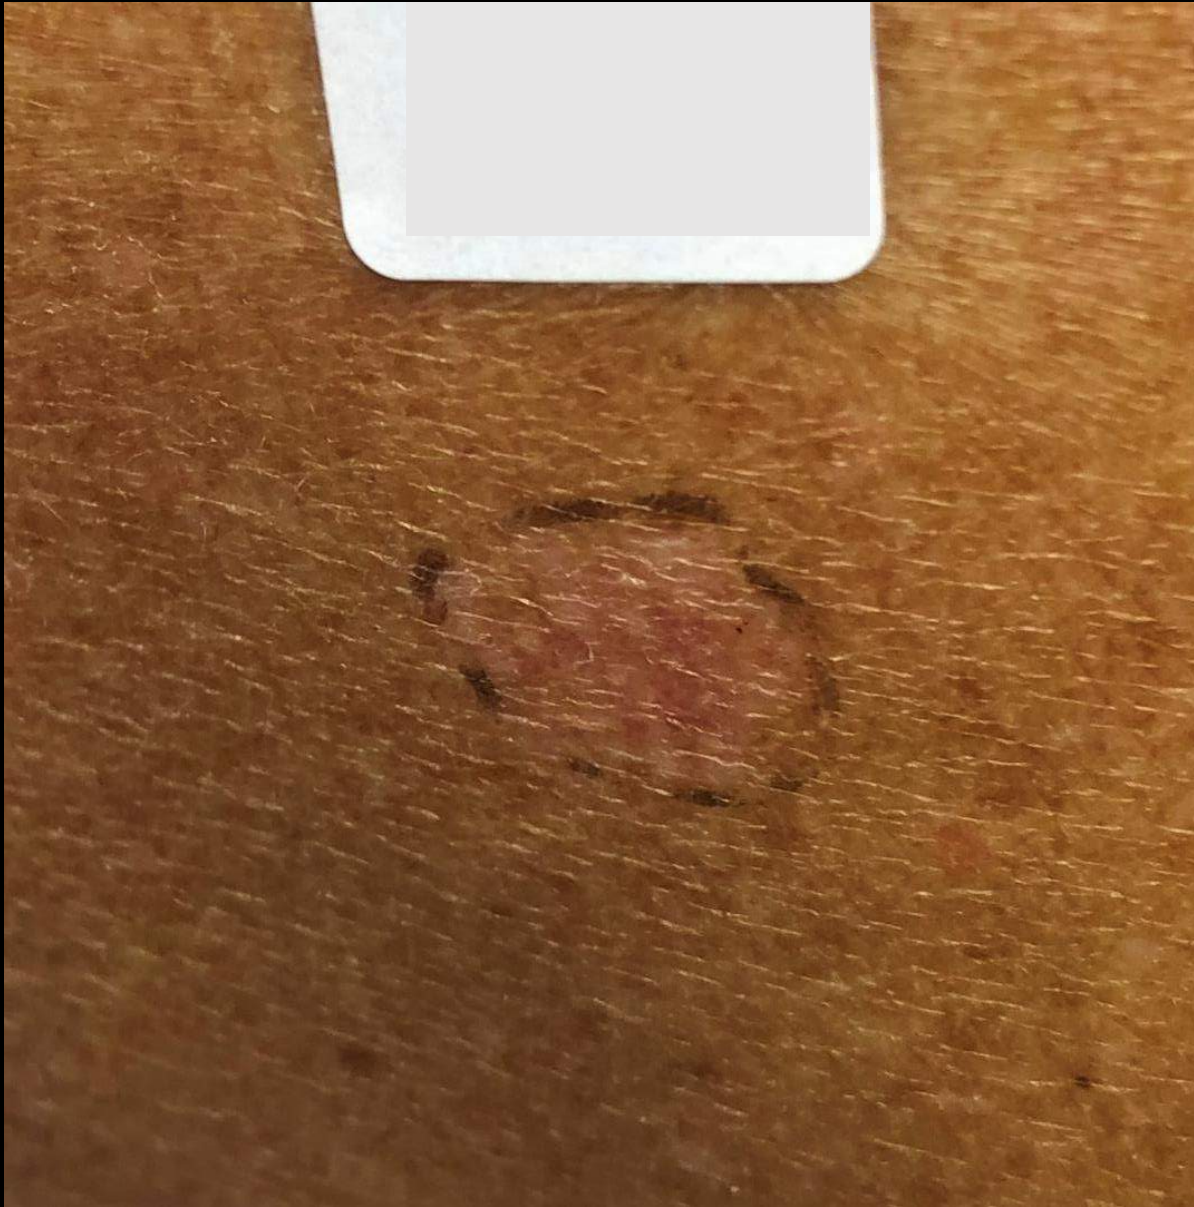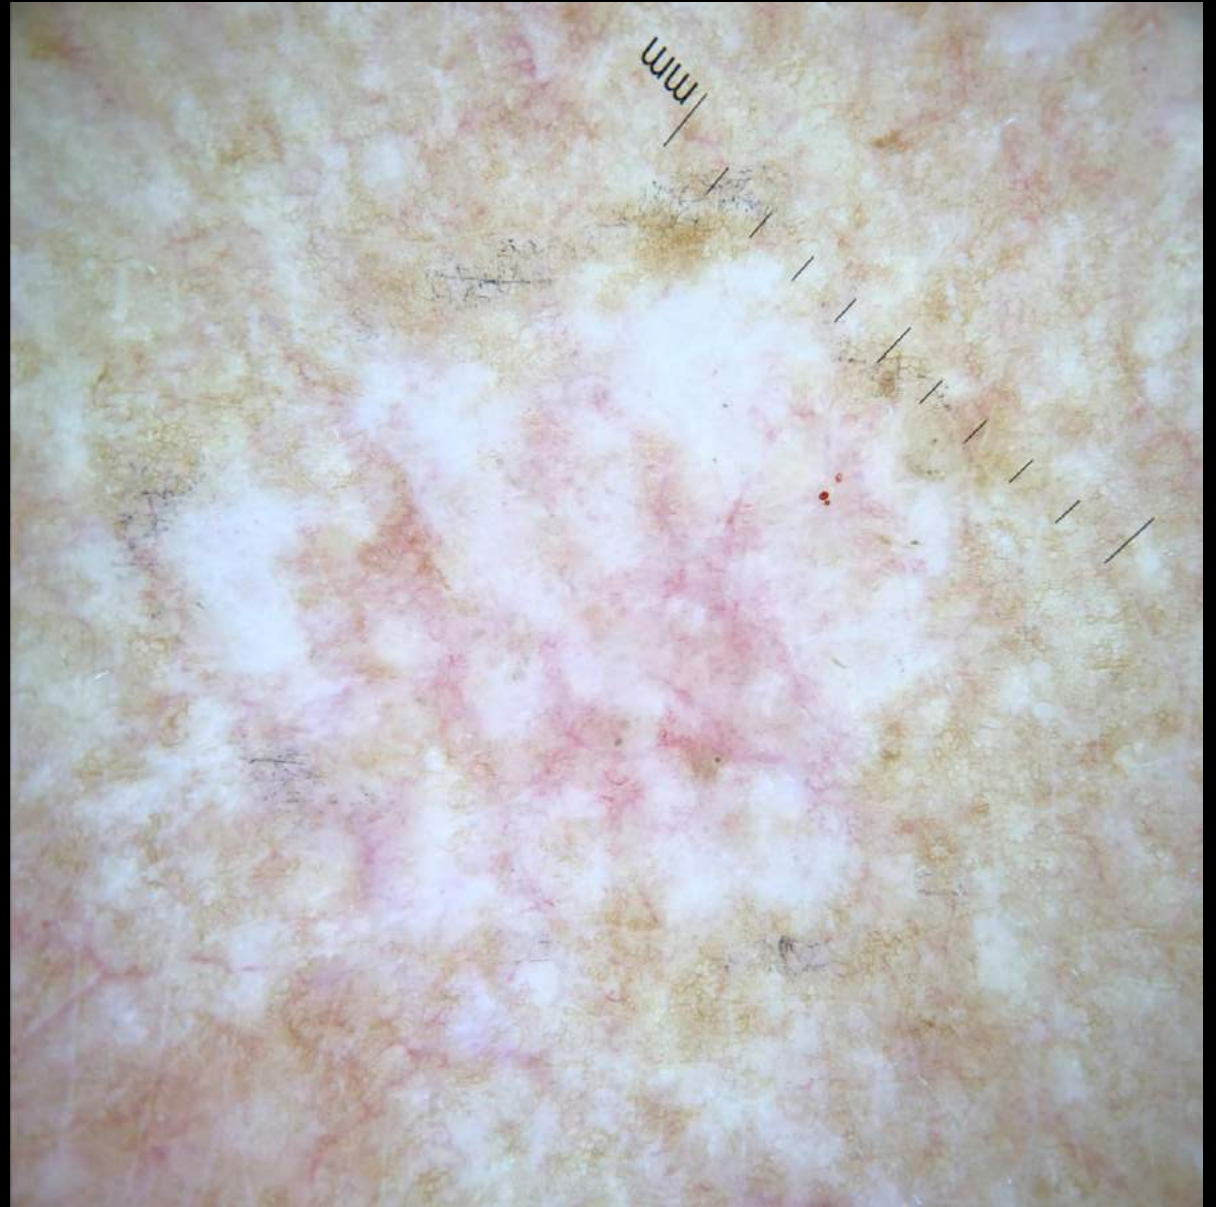

Case number 76



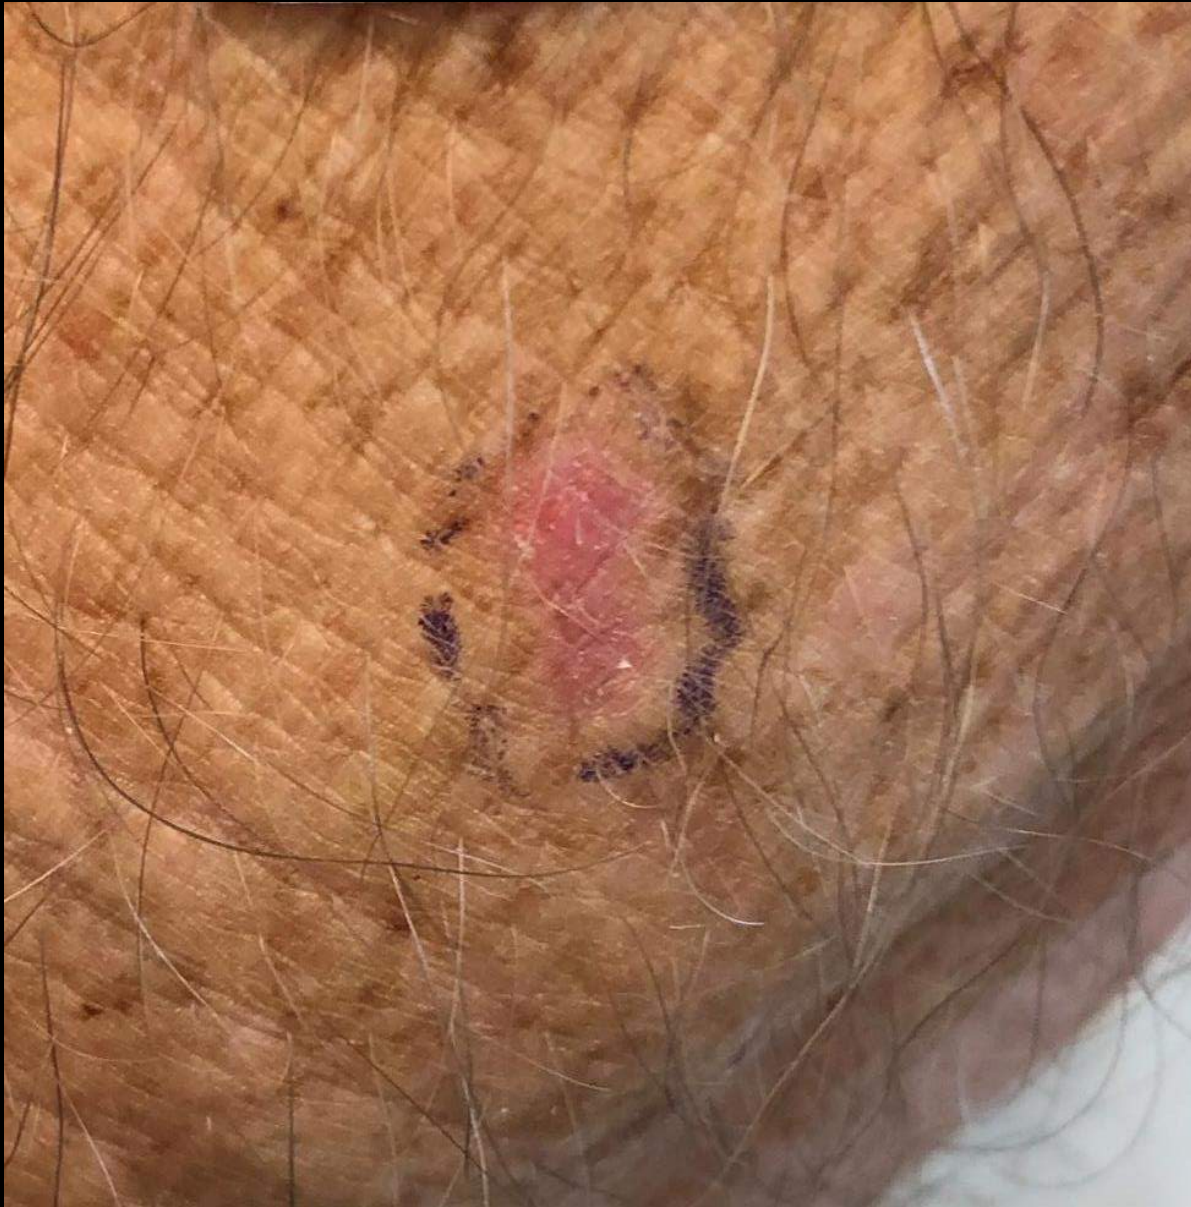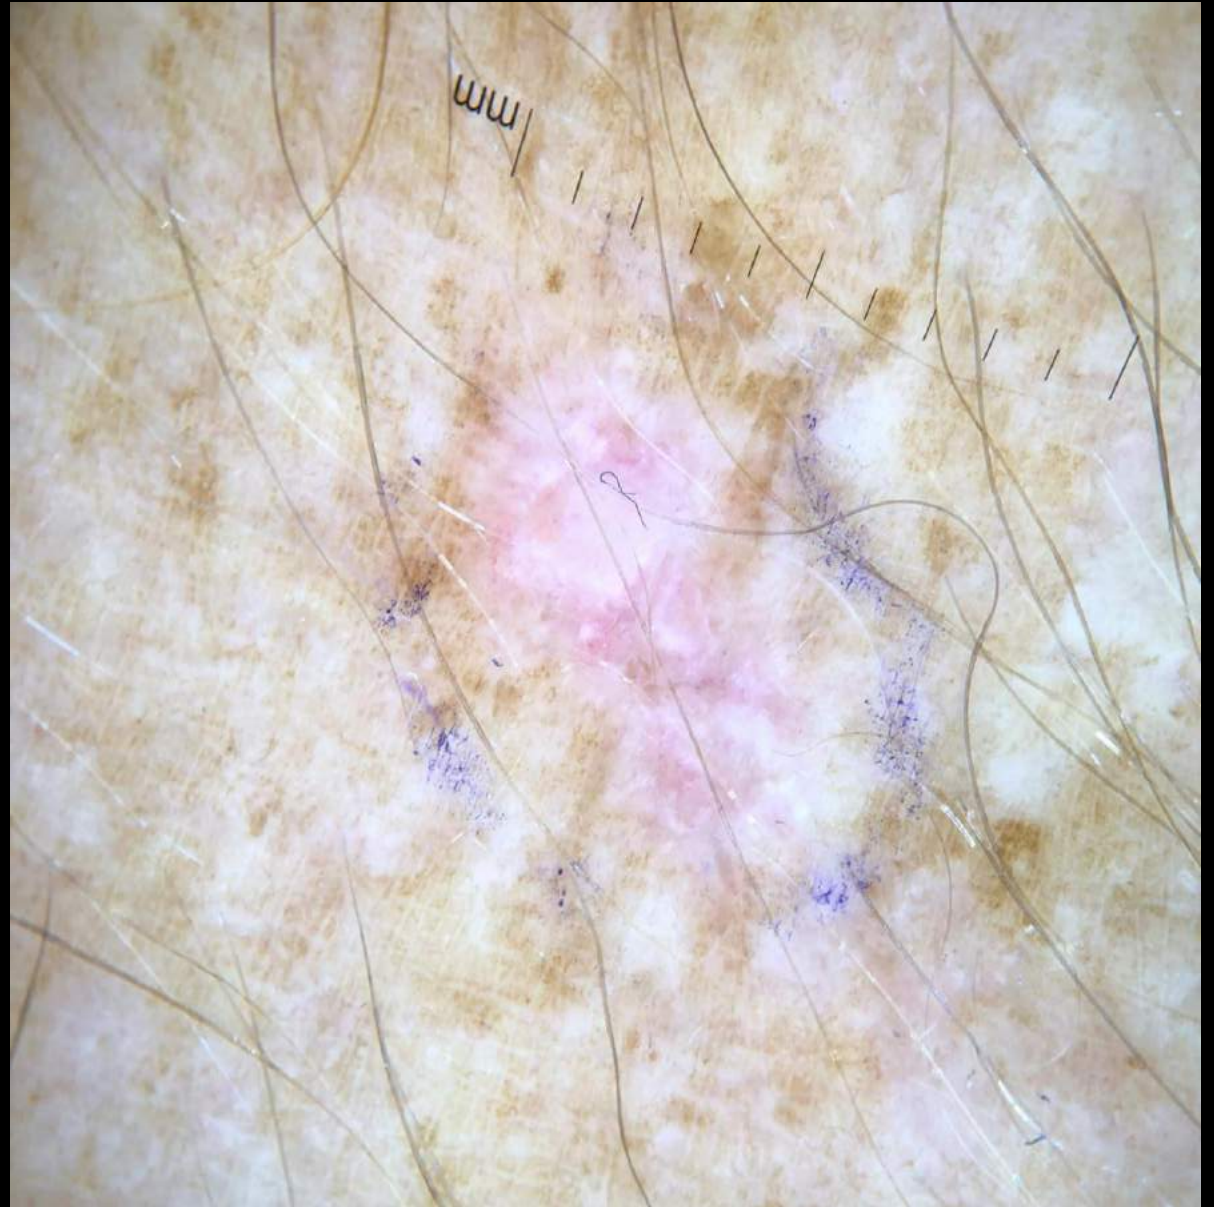

Case number 77



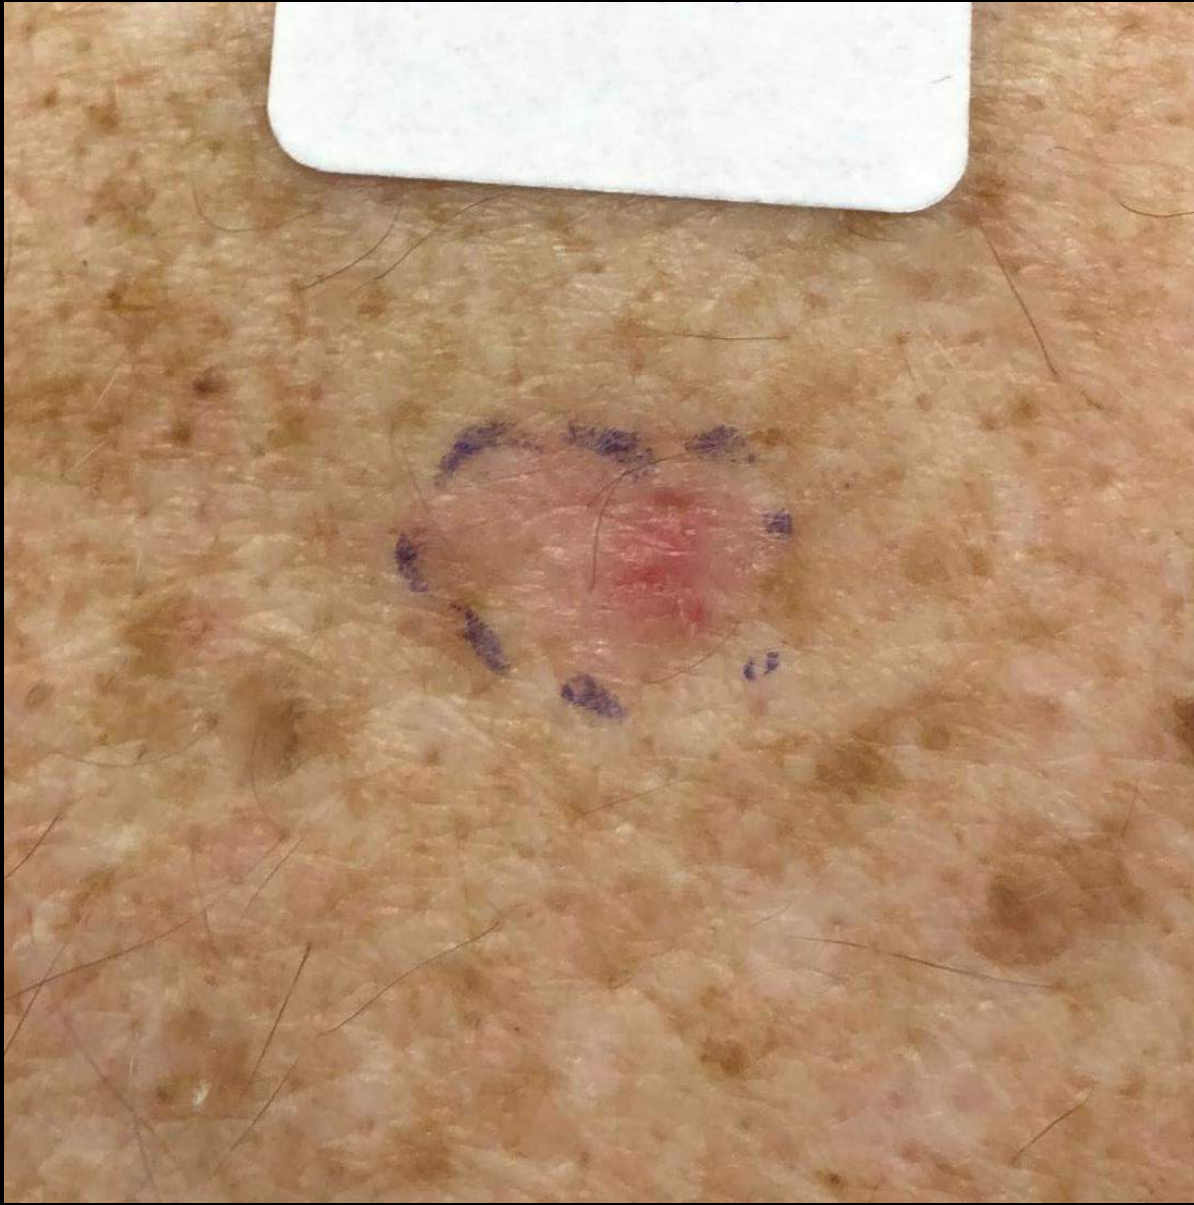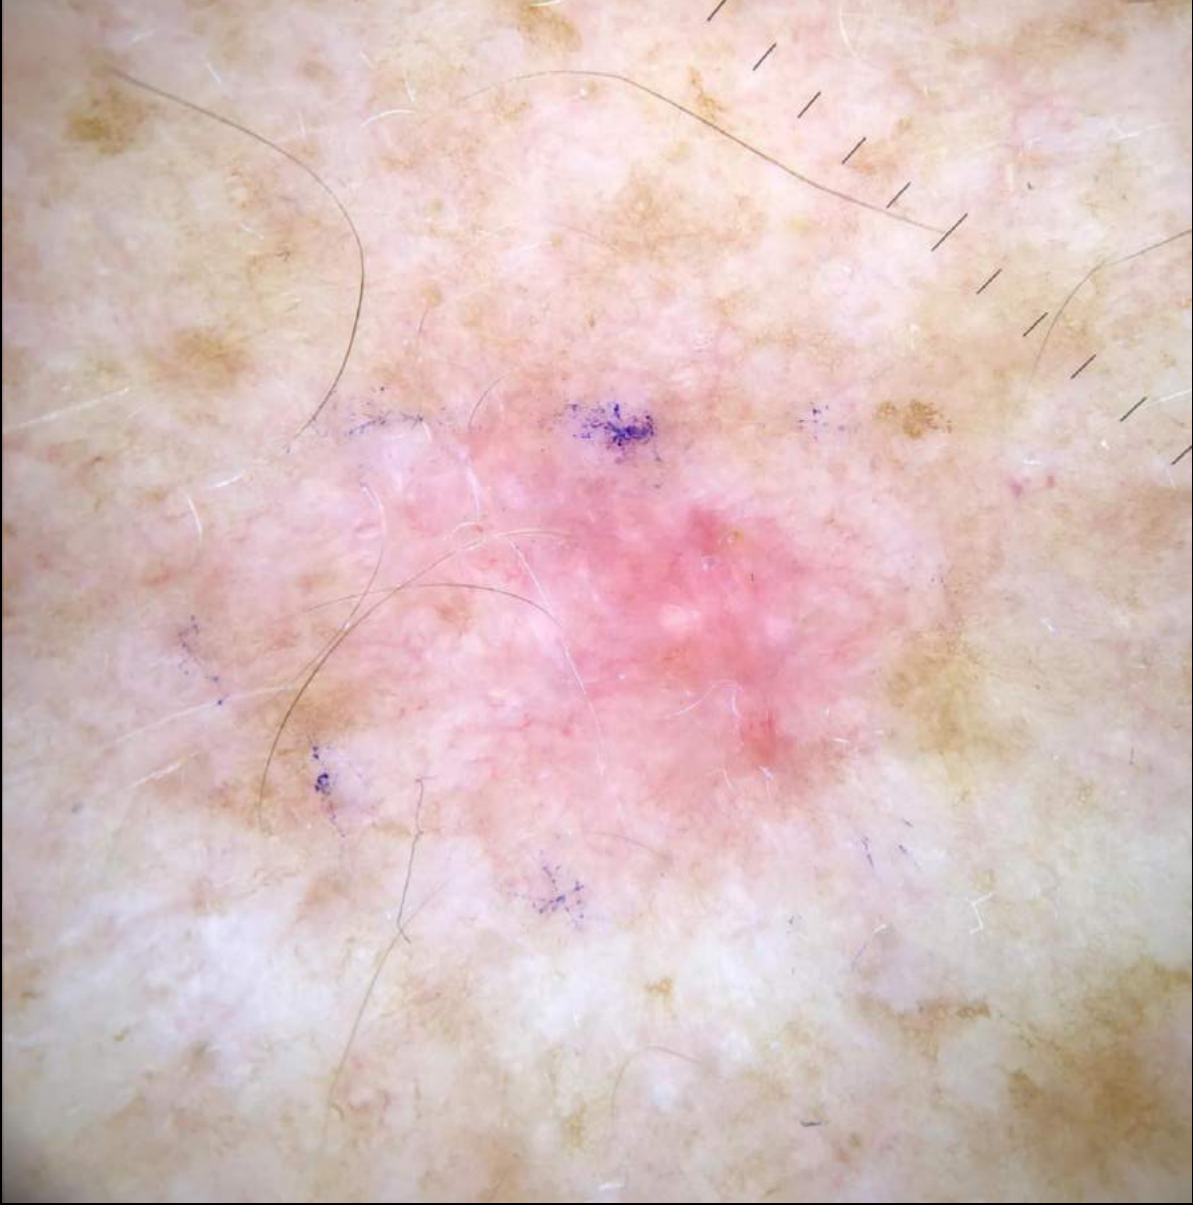

Case number 78



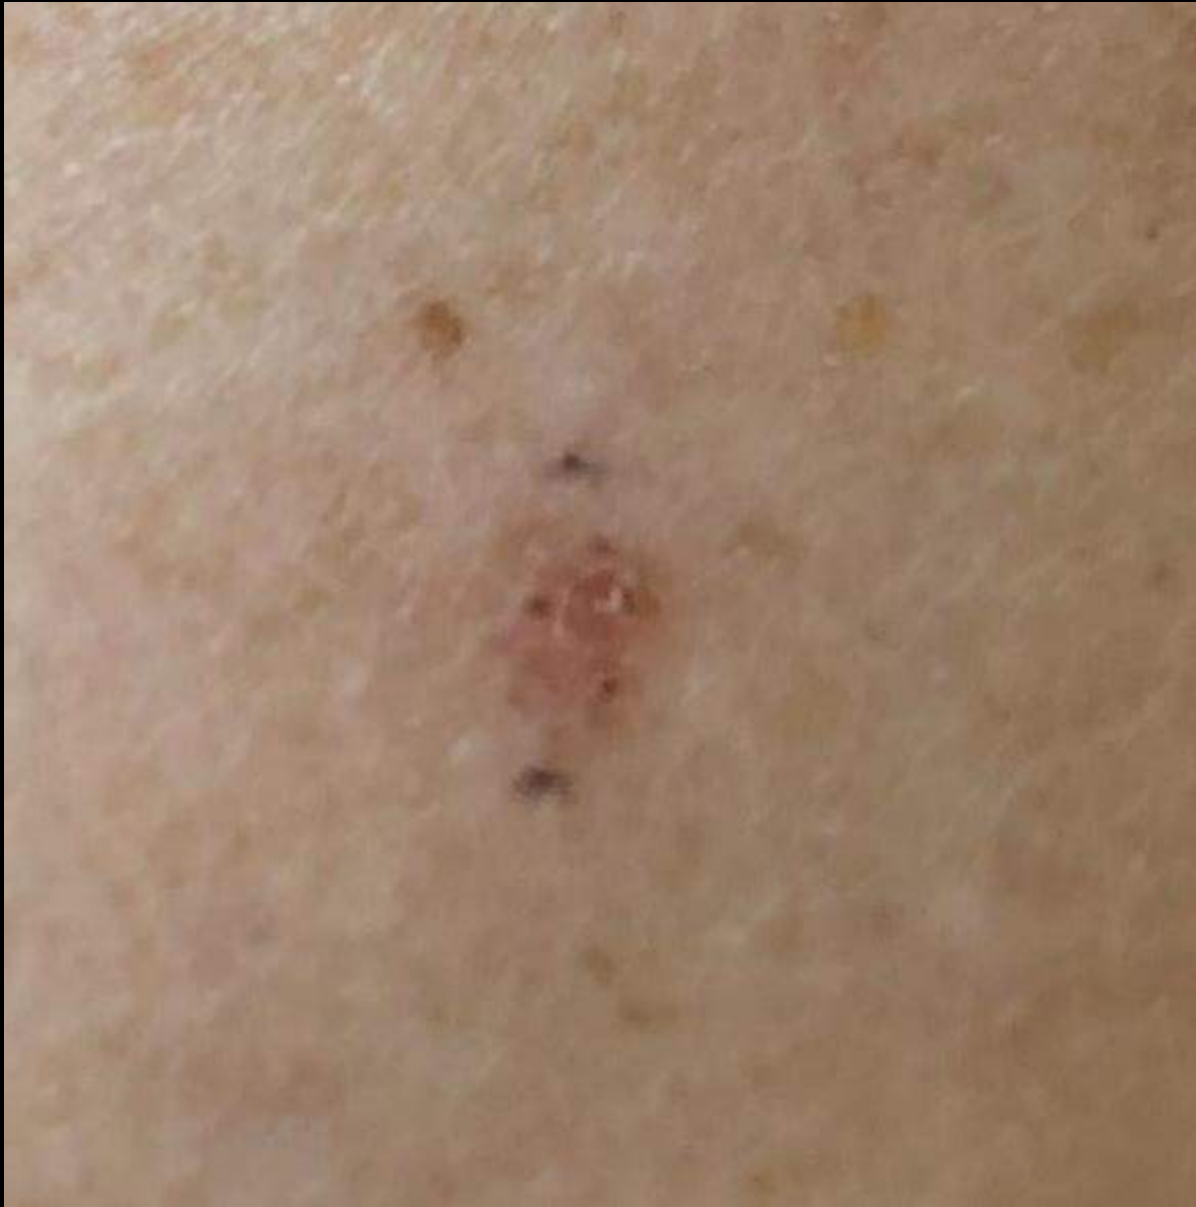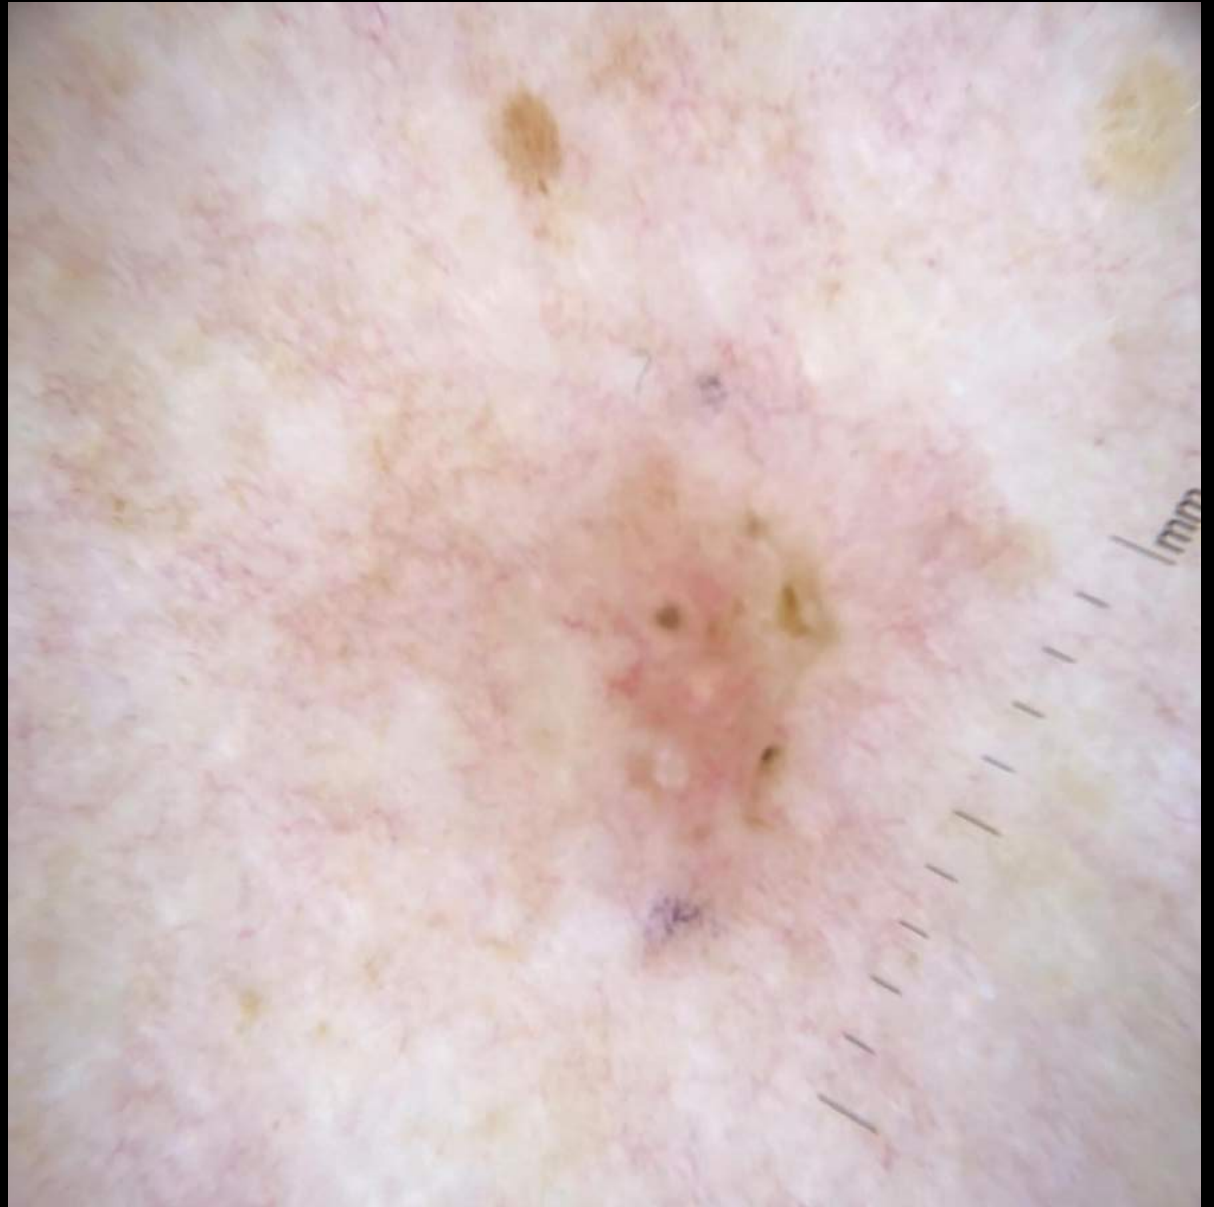

Case number 79



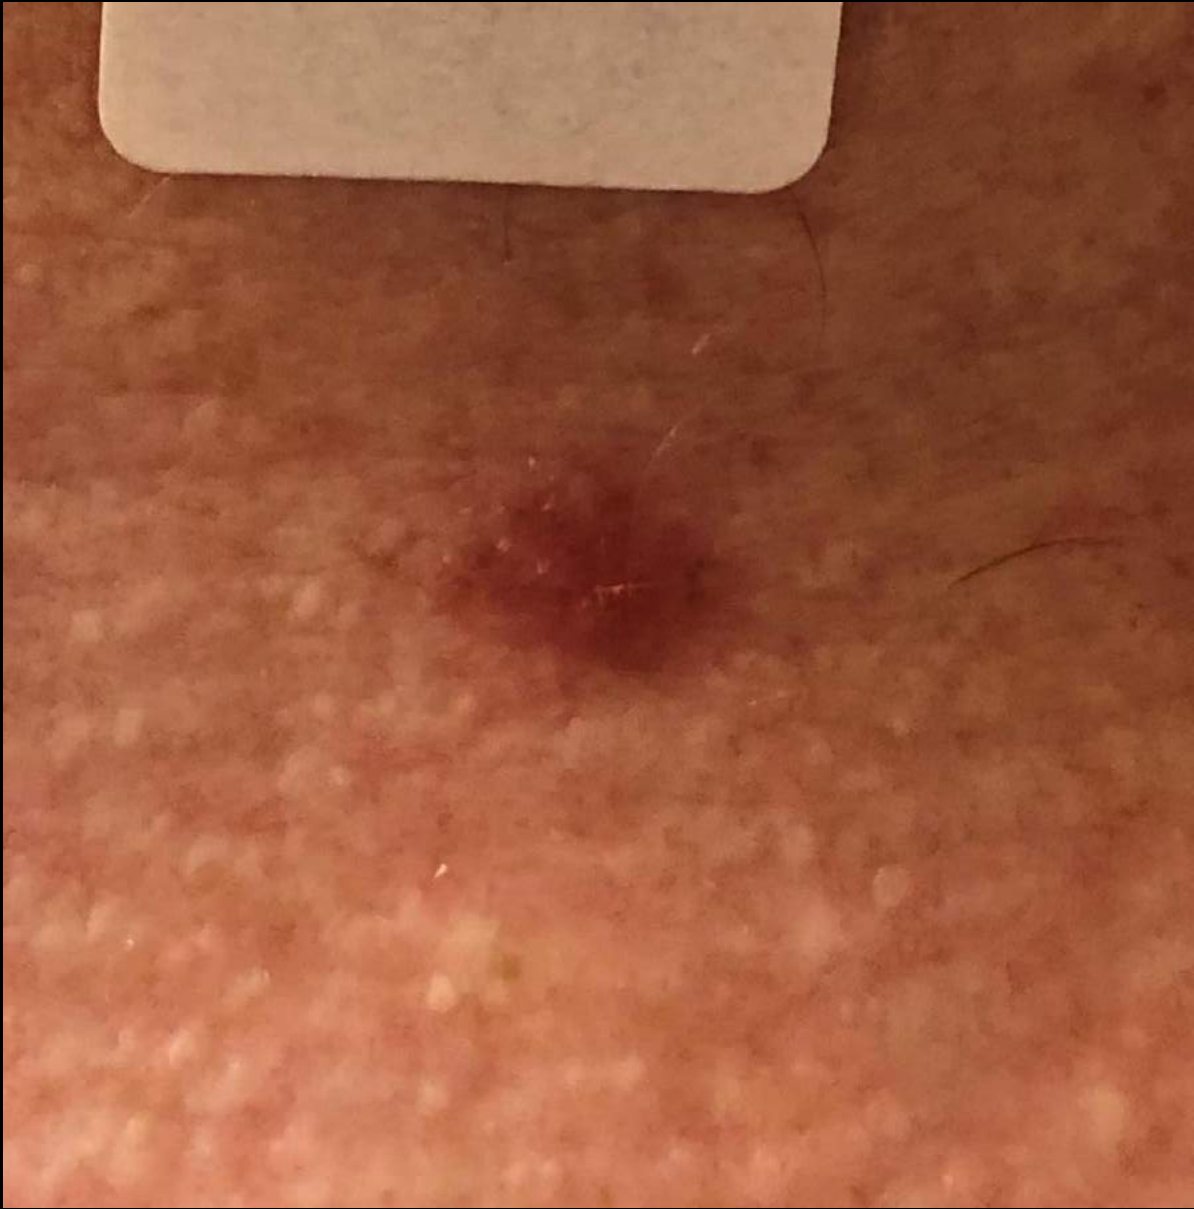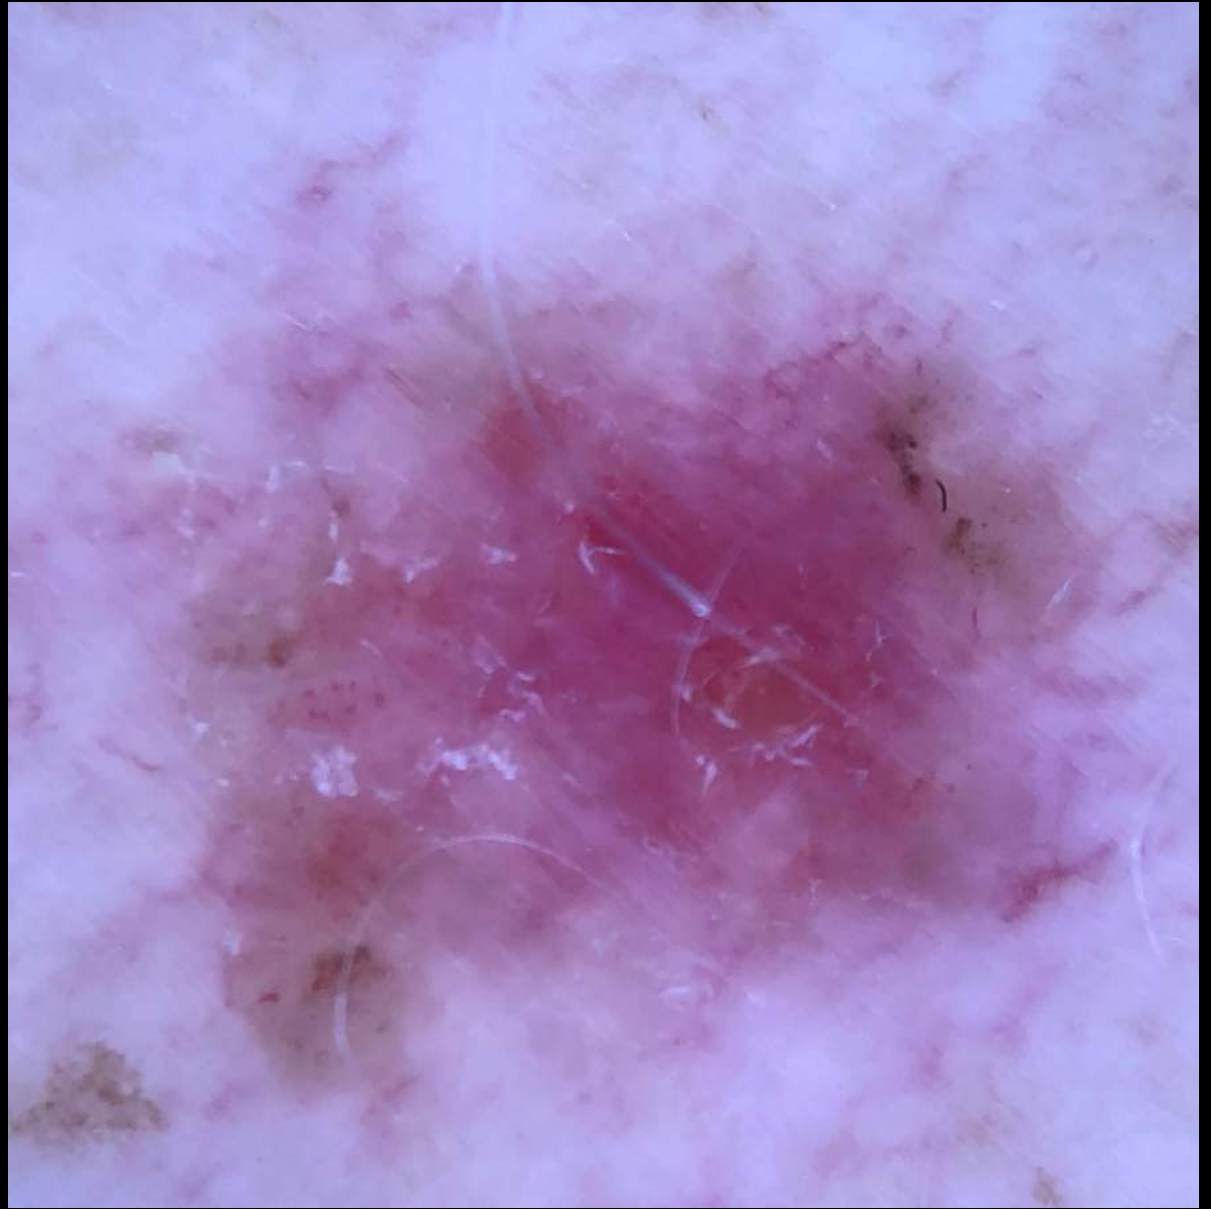

Case number 80



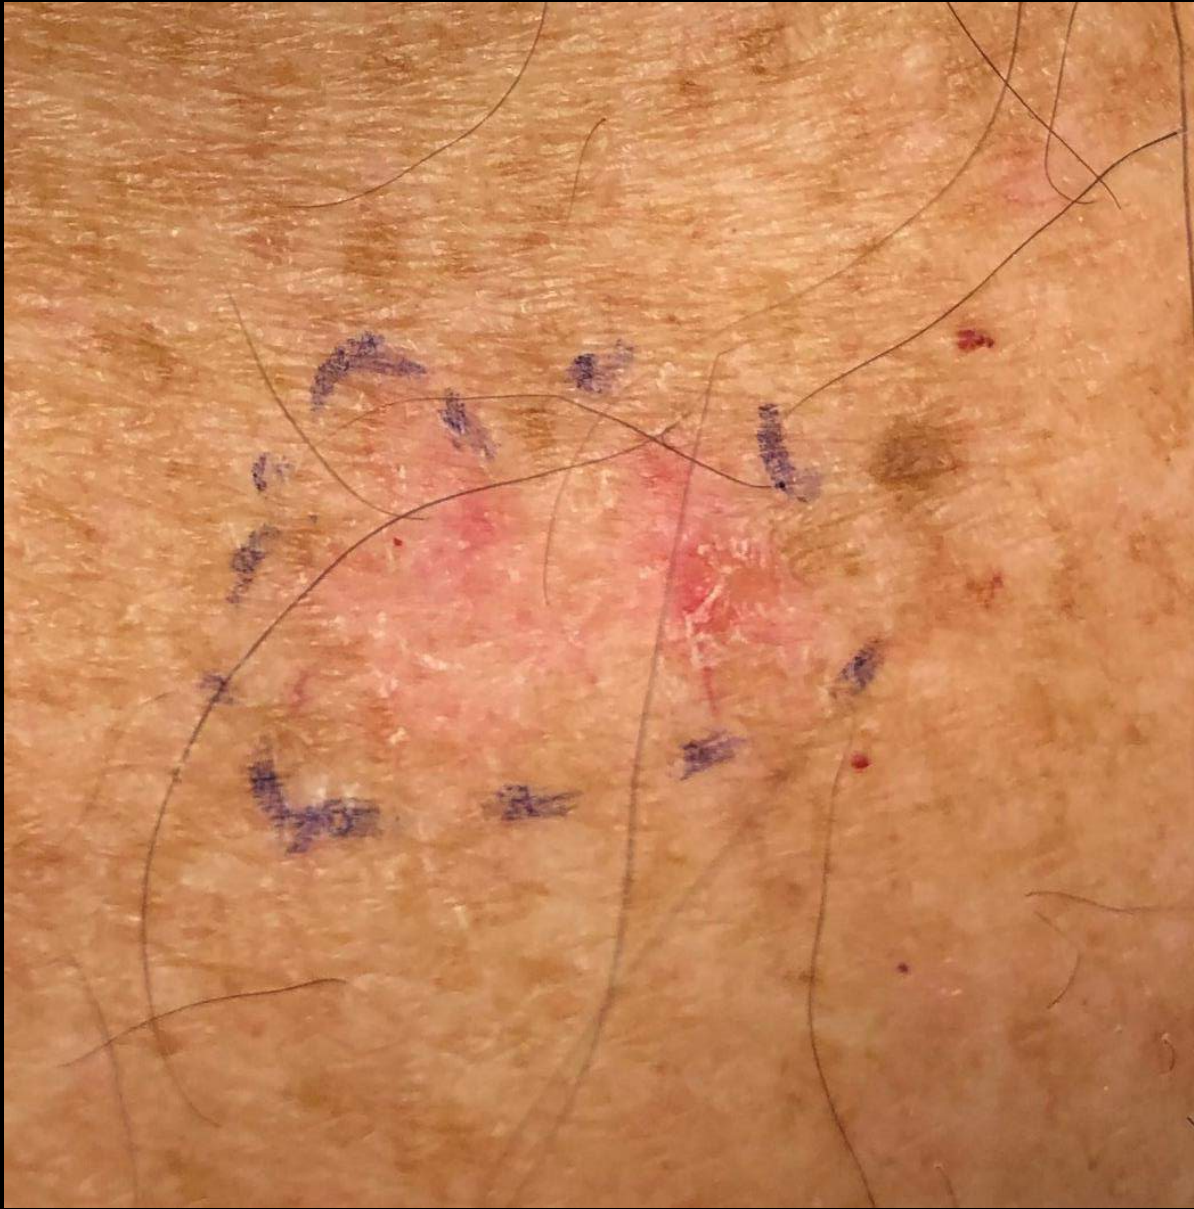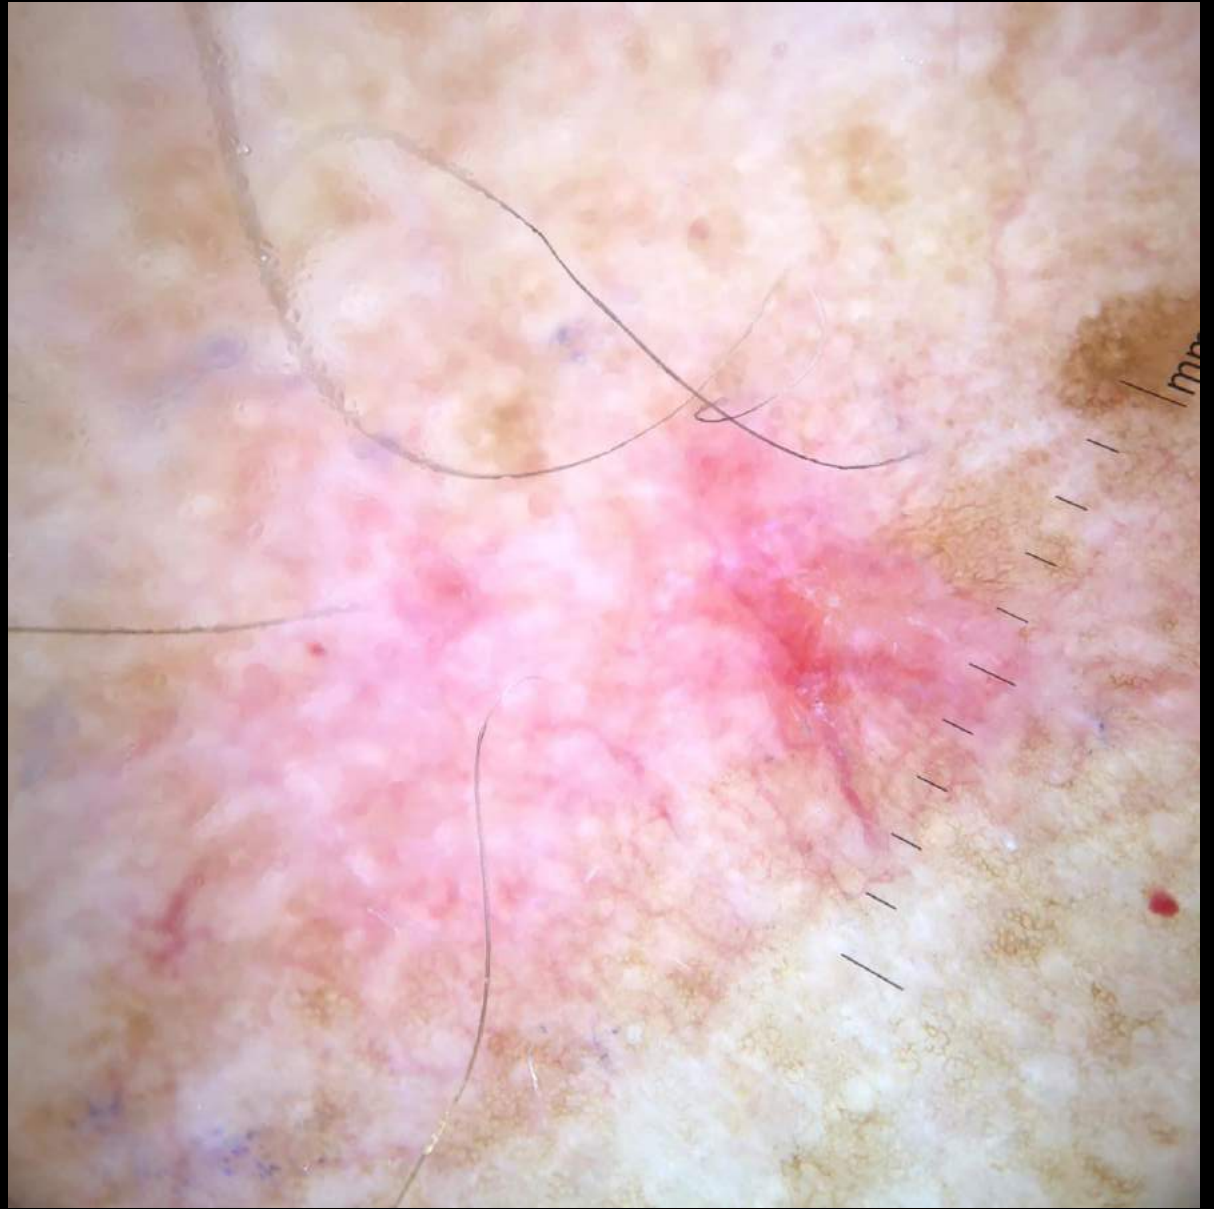

Case number 81



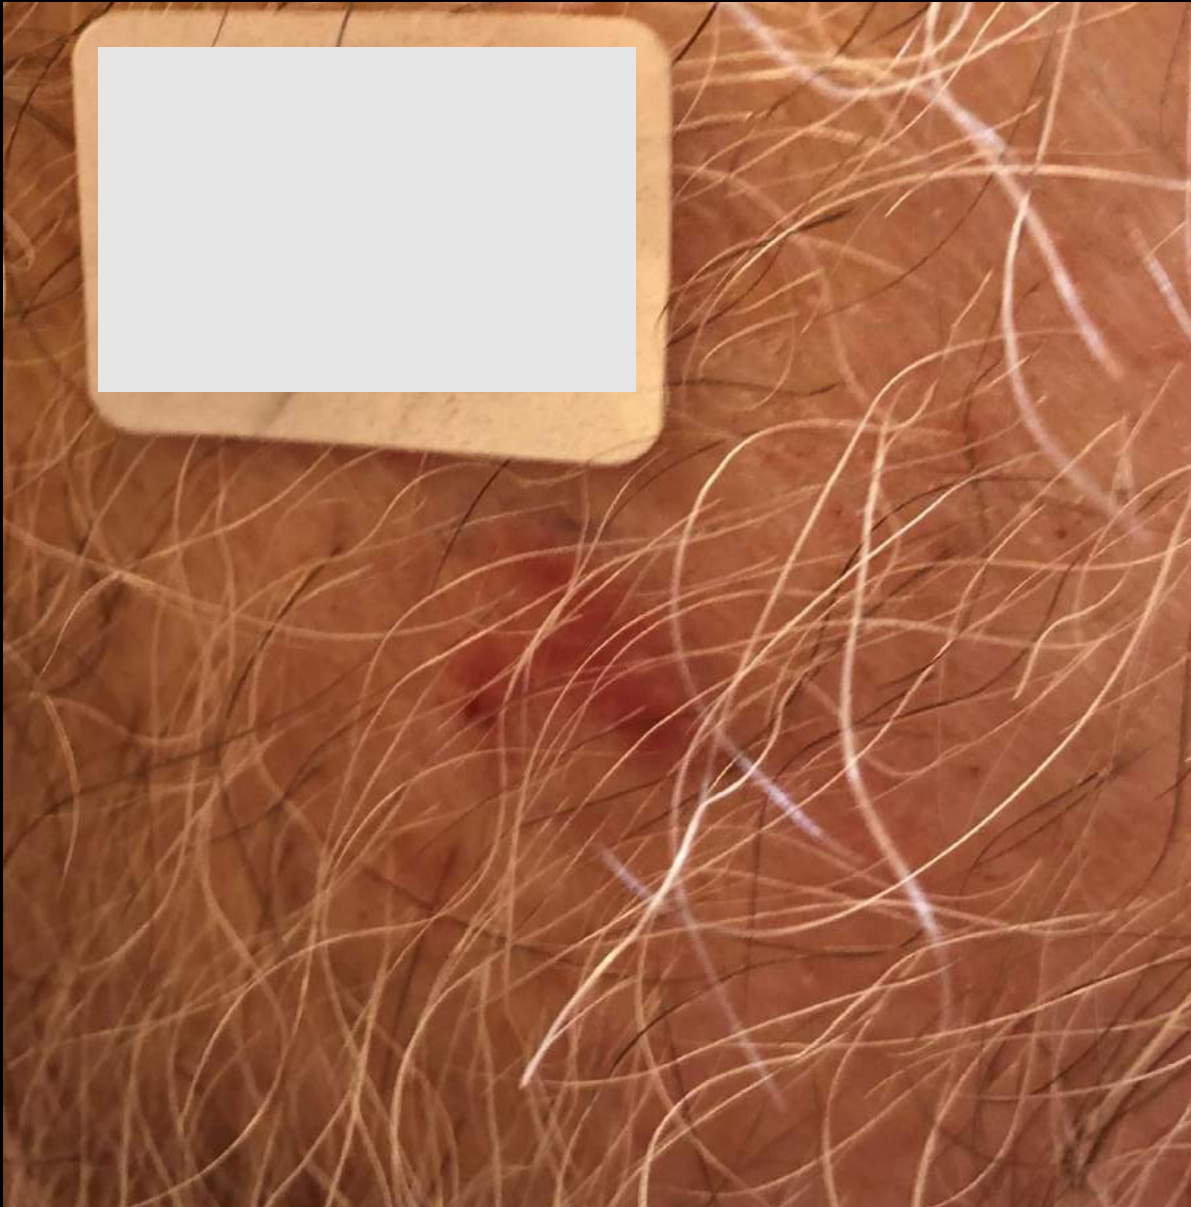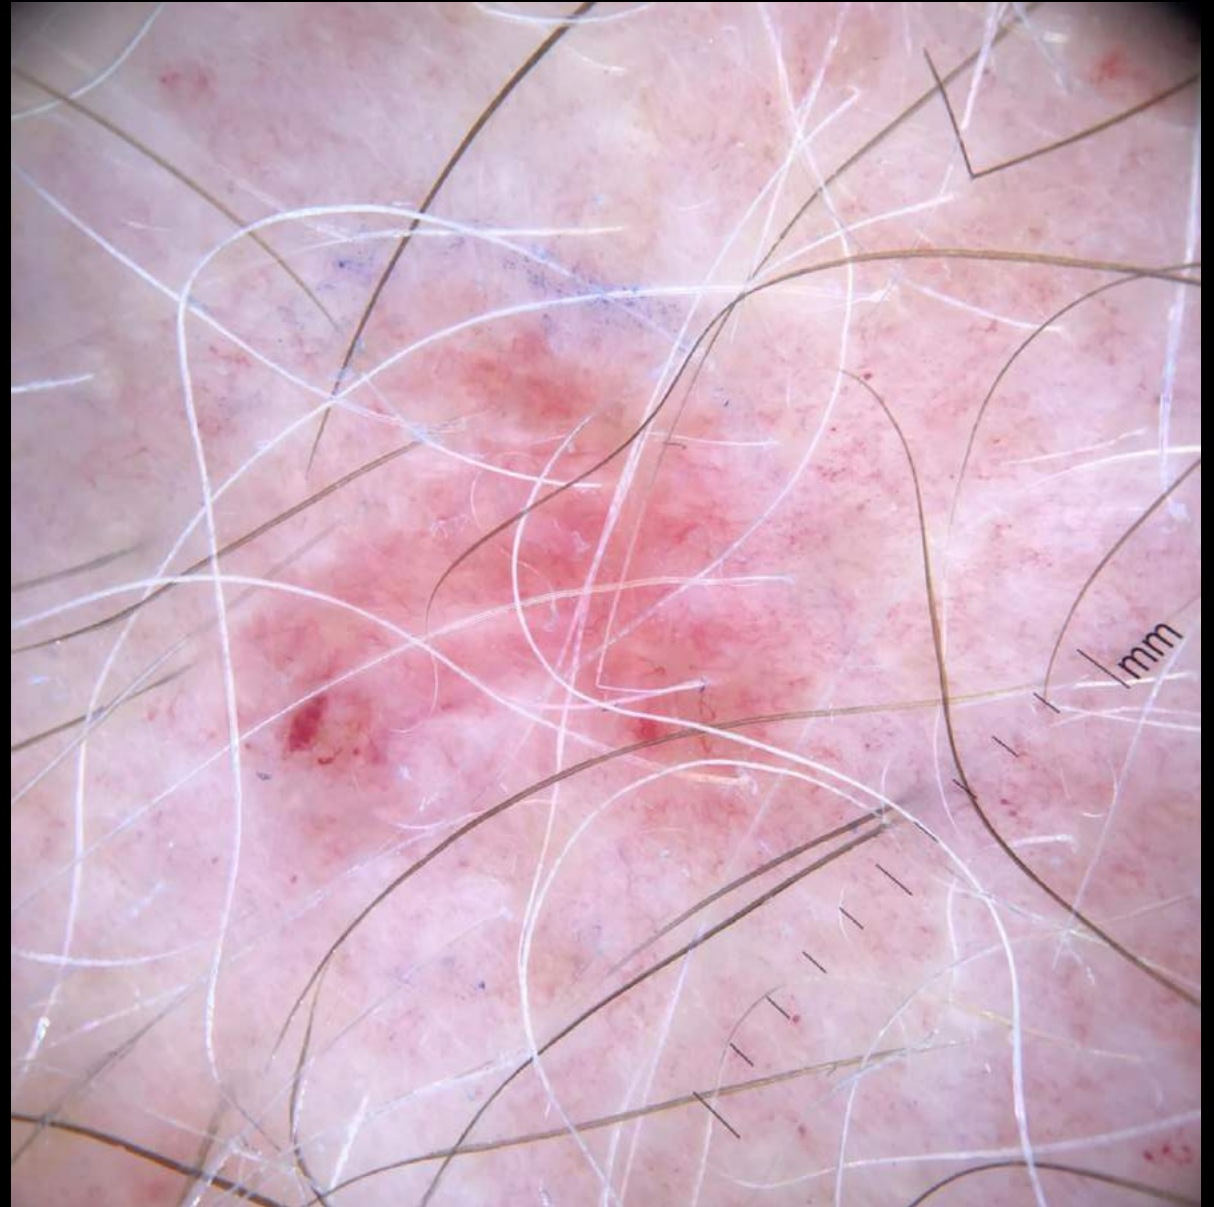

Case number 82



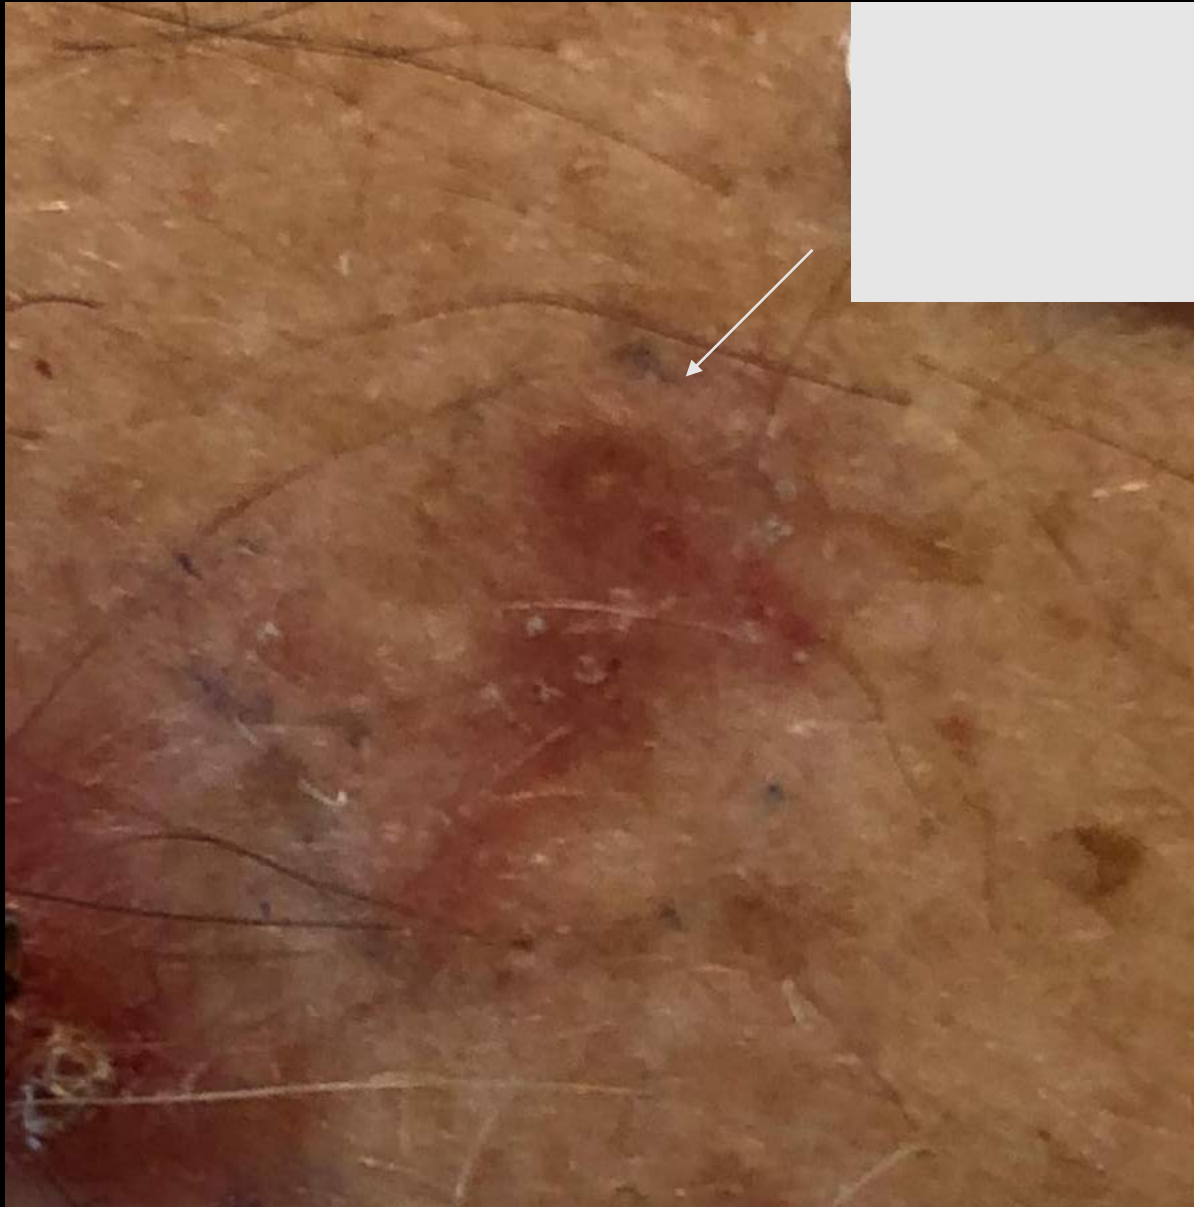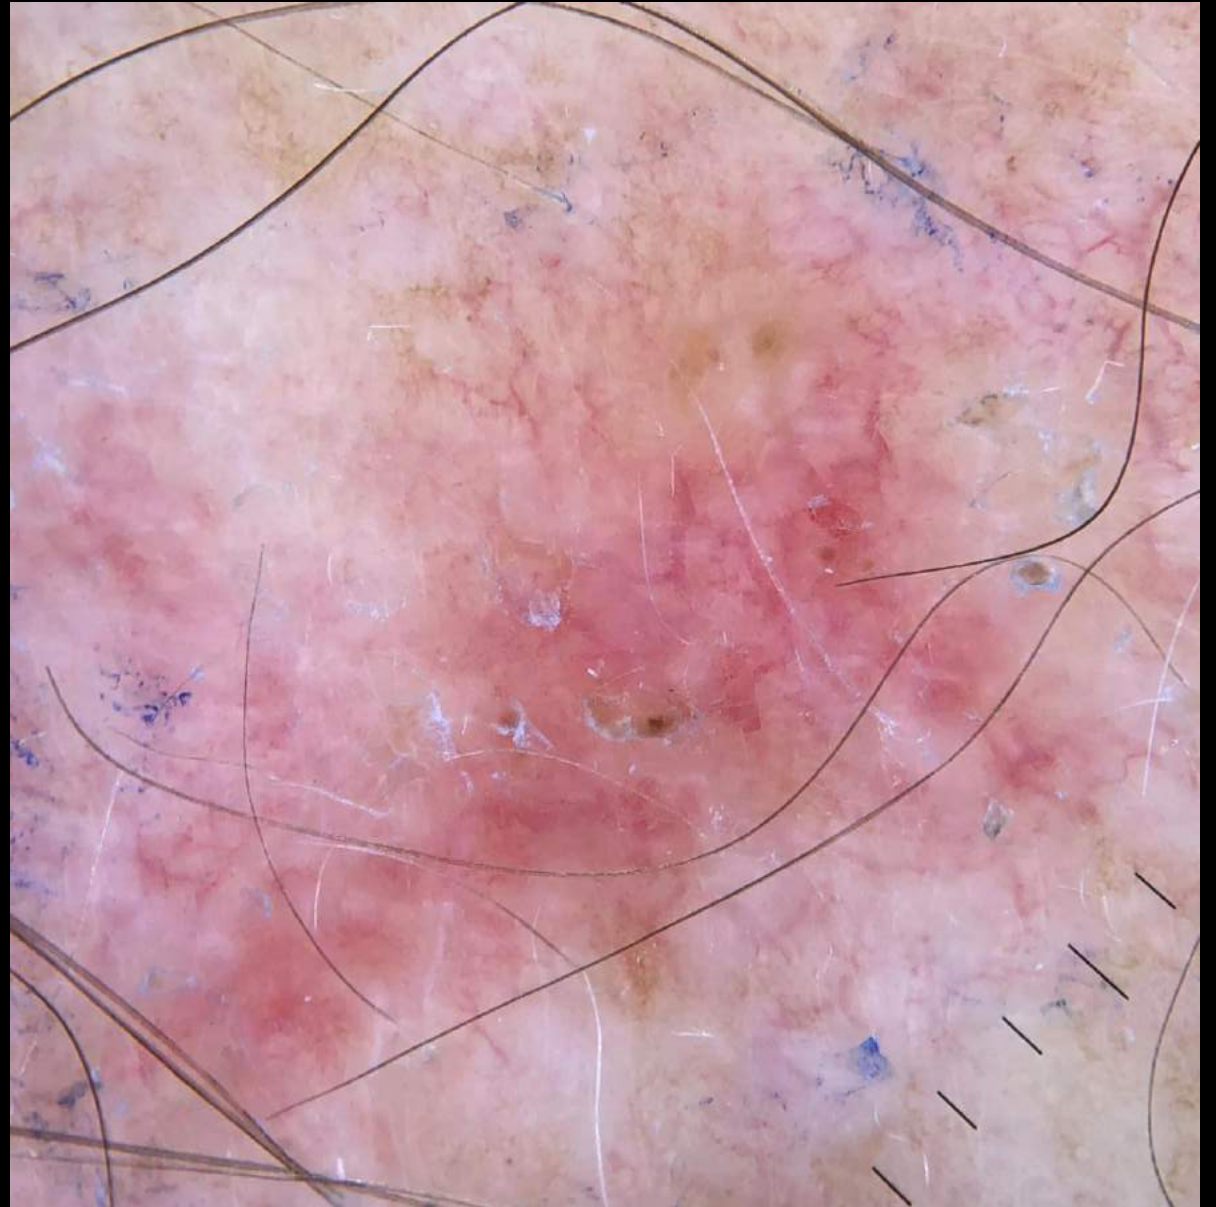

Case number 83



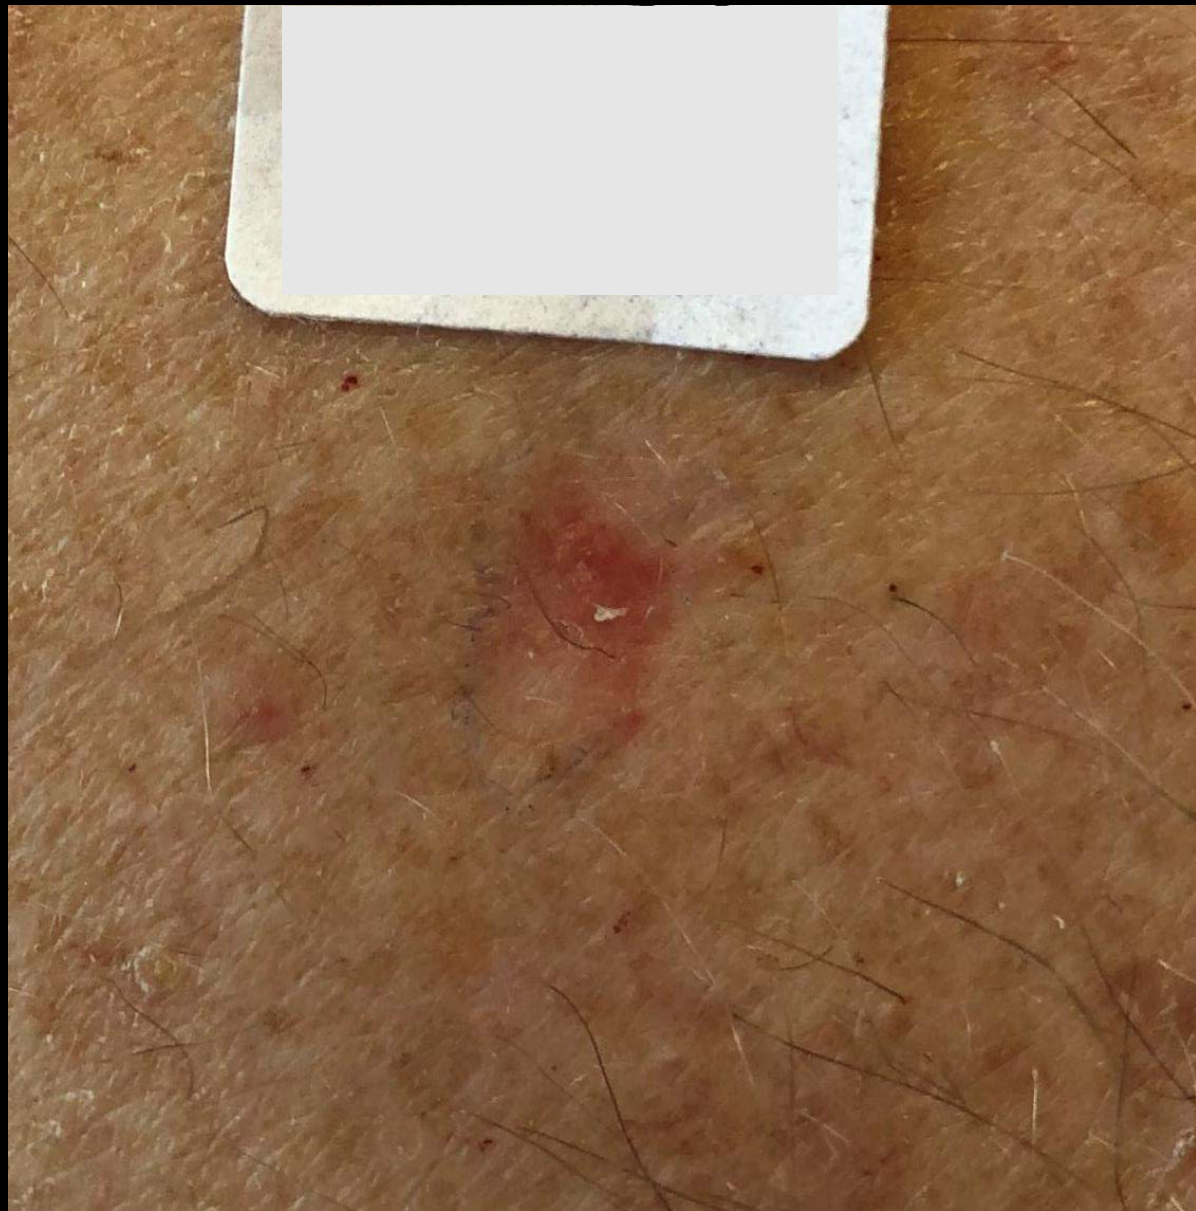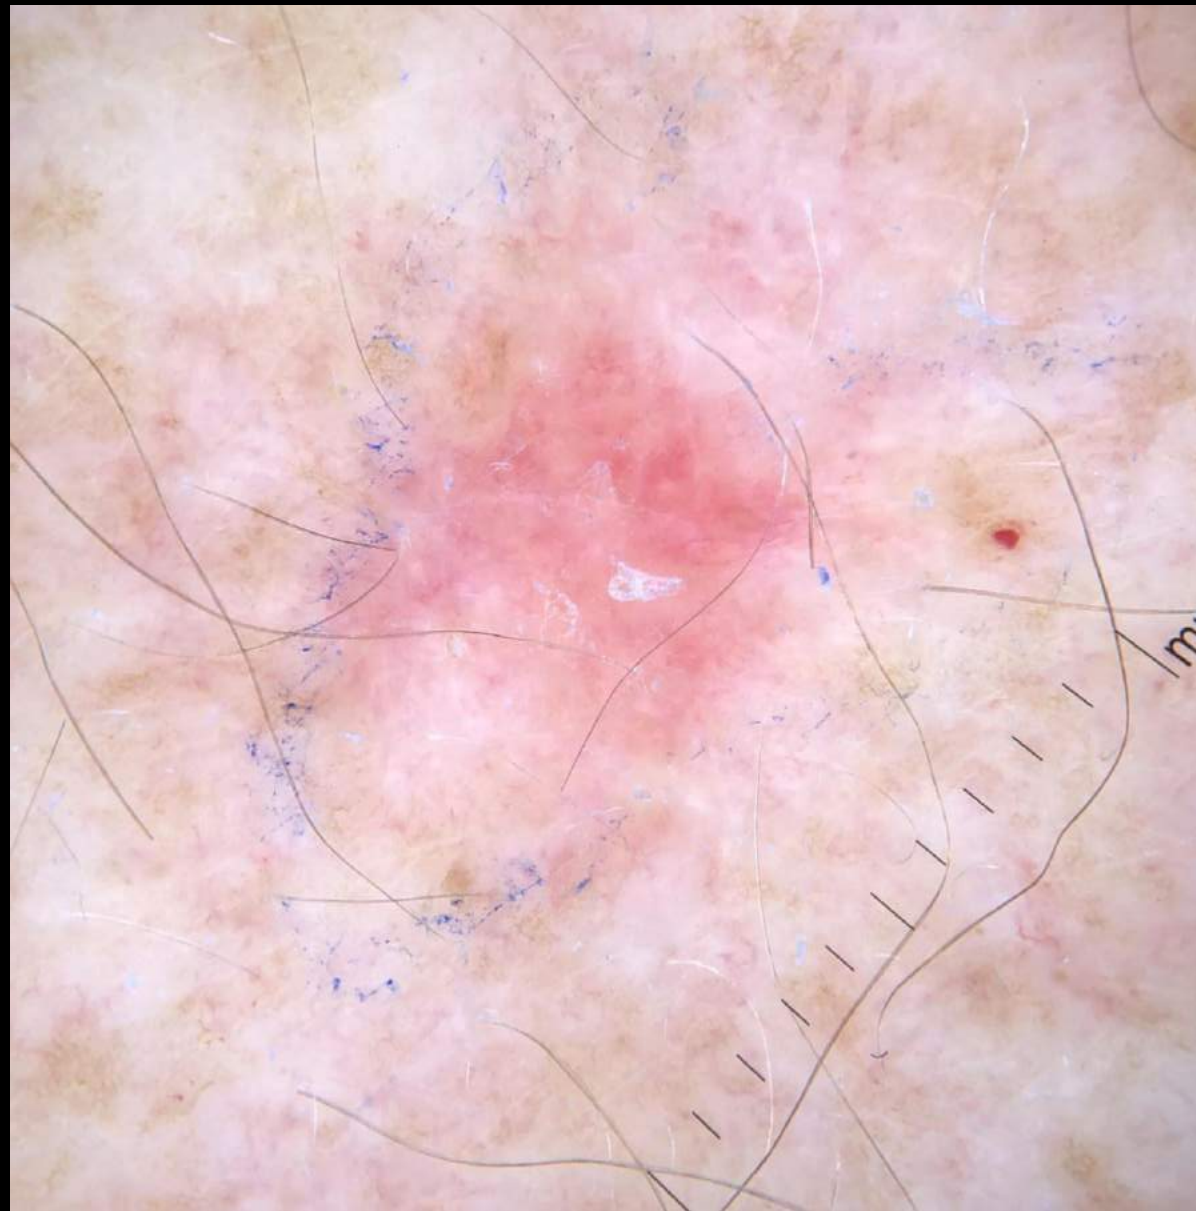

Case number 84



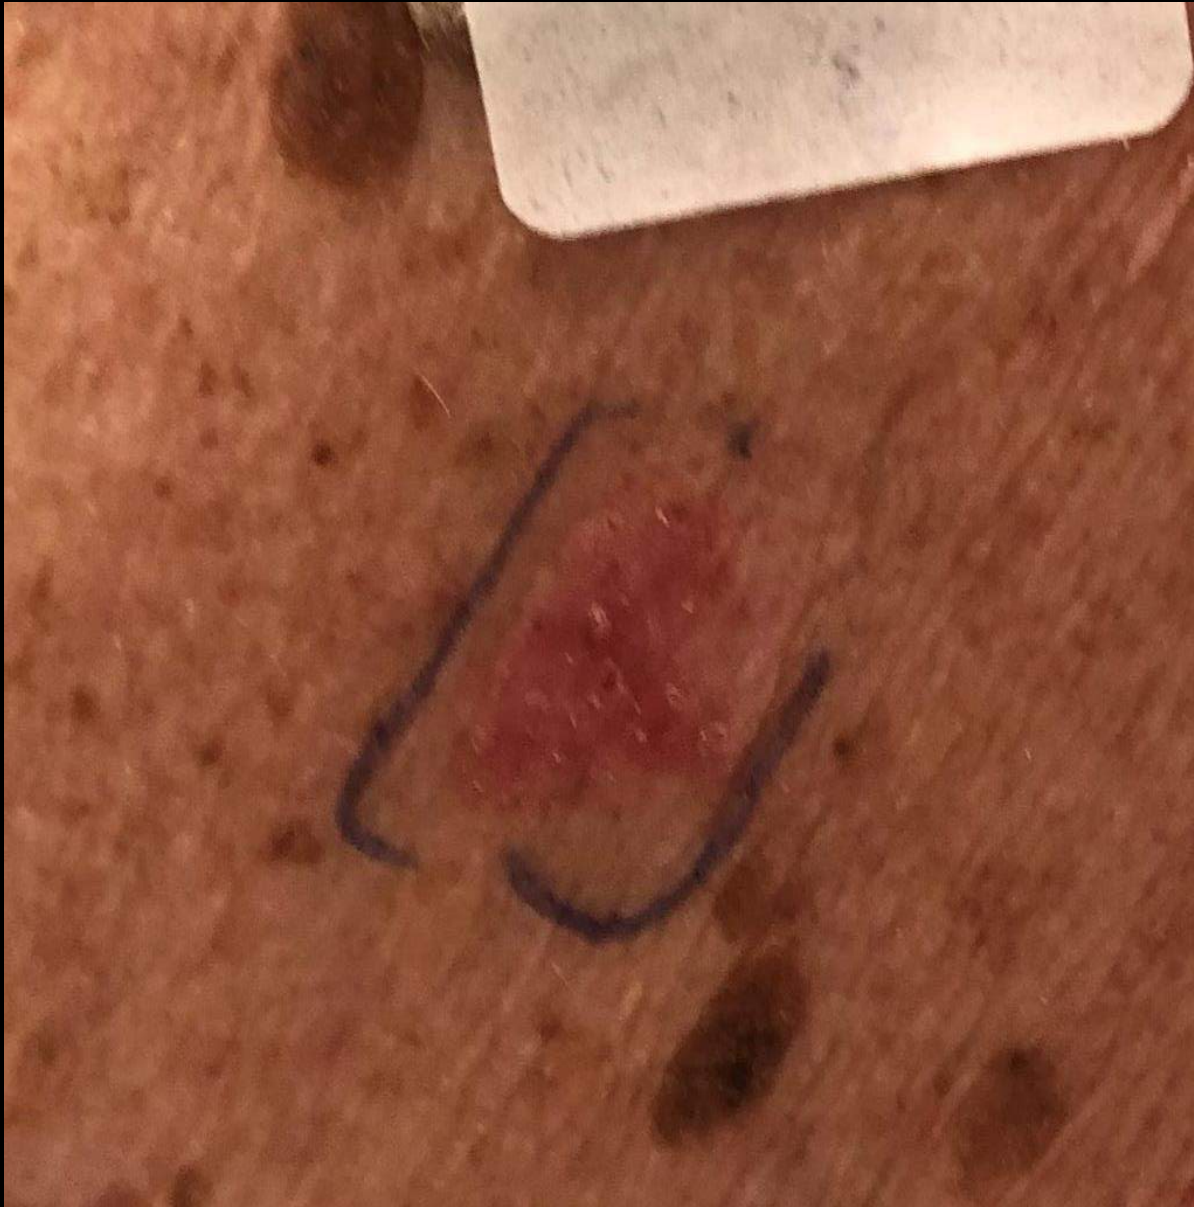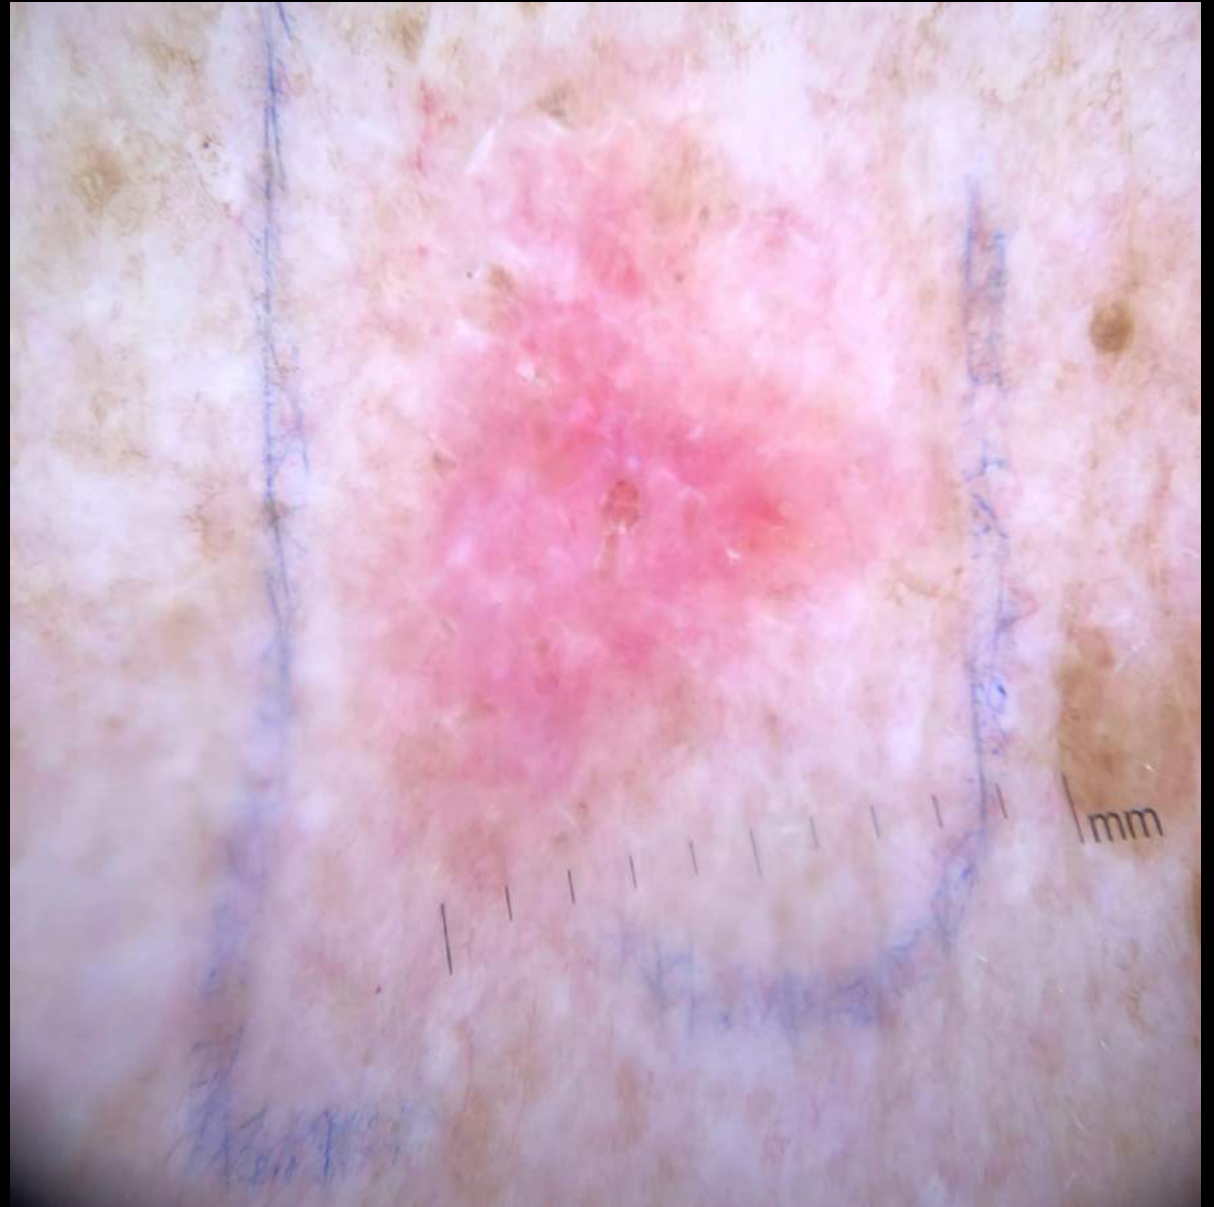

Case number 85



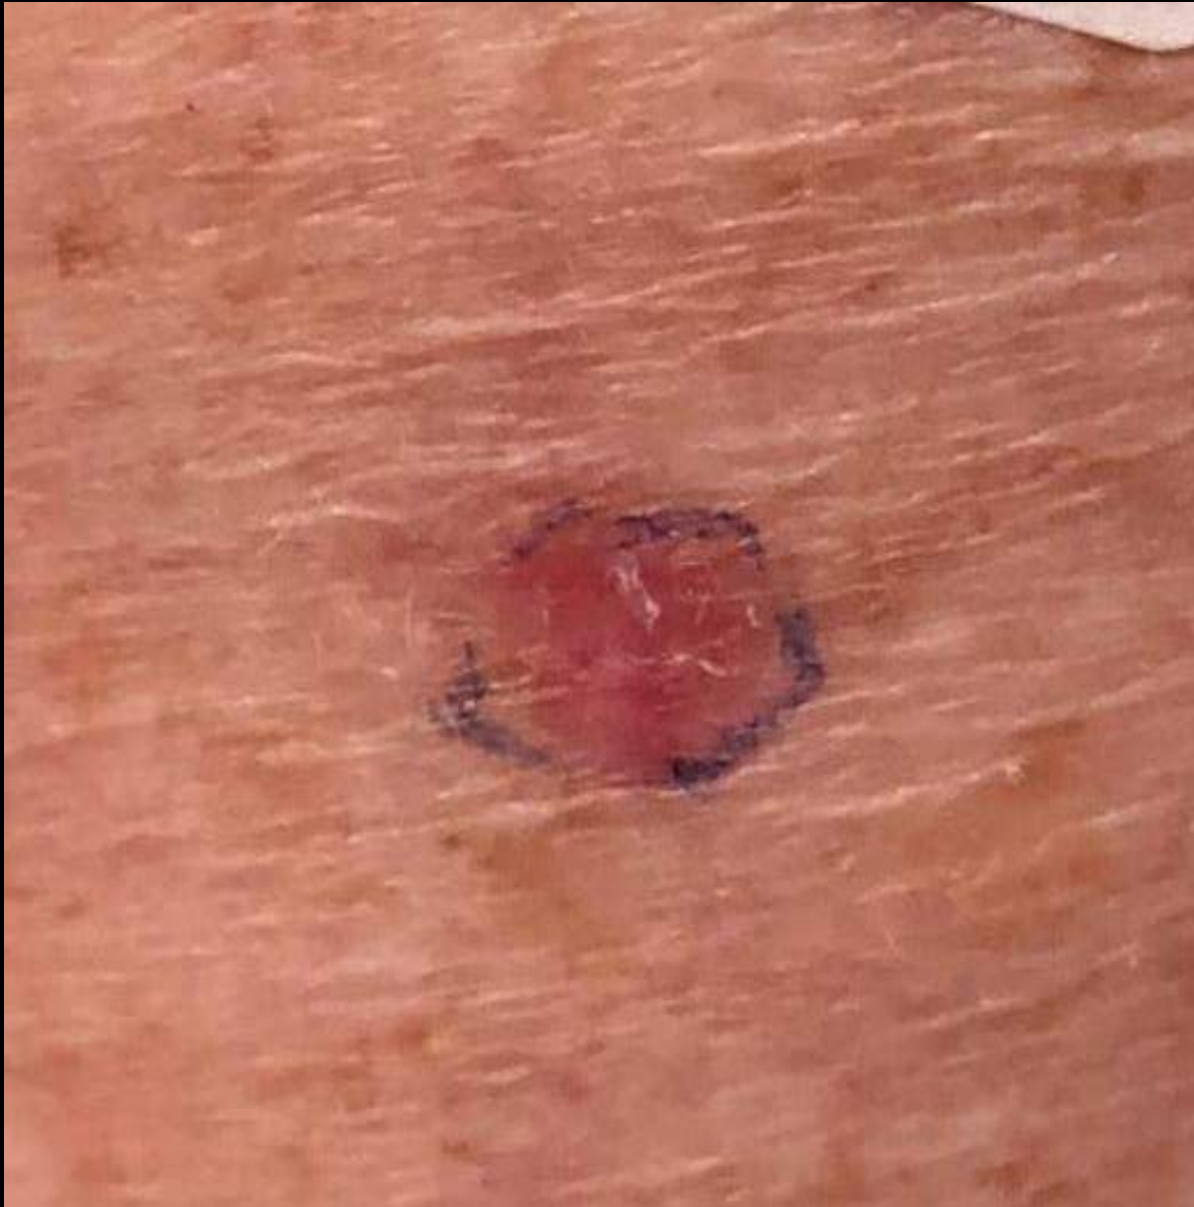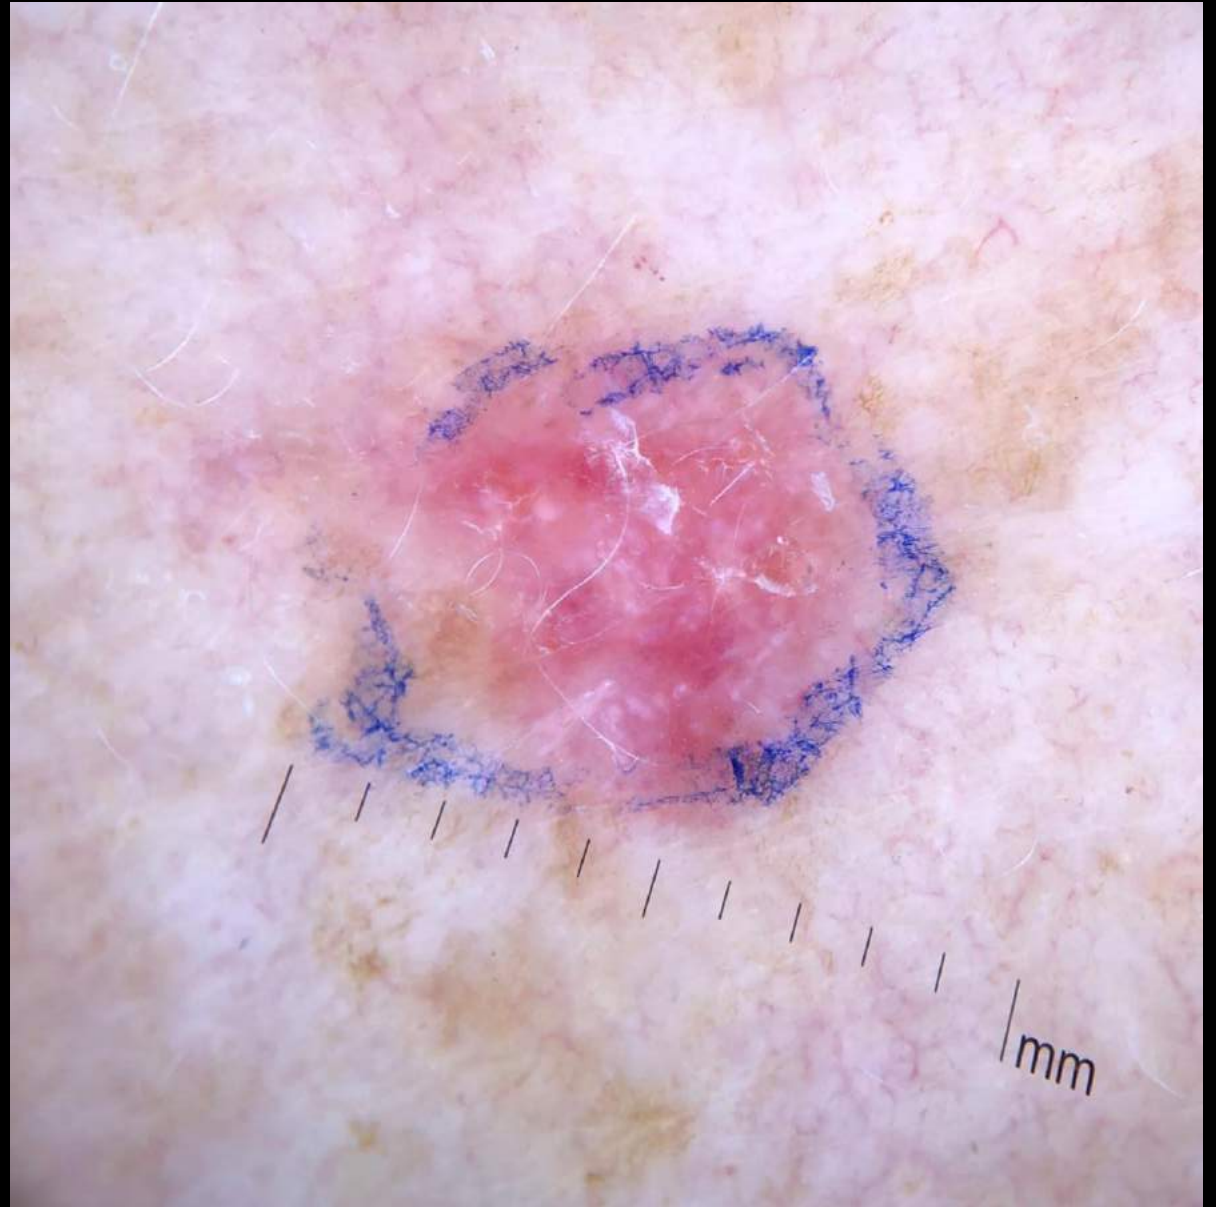

Case number 86
