# Supplementary material for: Curettage vs. cryosurgery for superficial basal cell carcinoma: a prospective, randomised and controlled trial
Source: PubMed Central journal article supplement — J Eur Acad Dermatol Venereol. 2022 May 21;36(10):1758–65. doi: 10.1111/jdv.18209 (PMC9544261; doi:10.1111/jdv.18209), 2022-05-21
Supplement: JDV-36-1758-s003.pdf [file JDV-36-1758-s003.pdf]

Inclusion

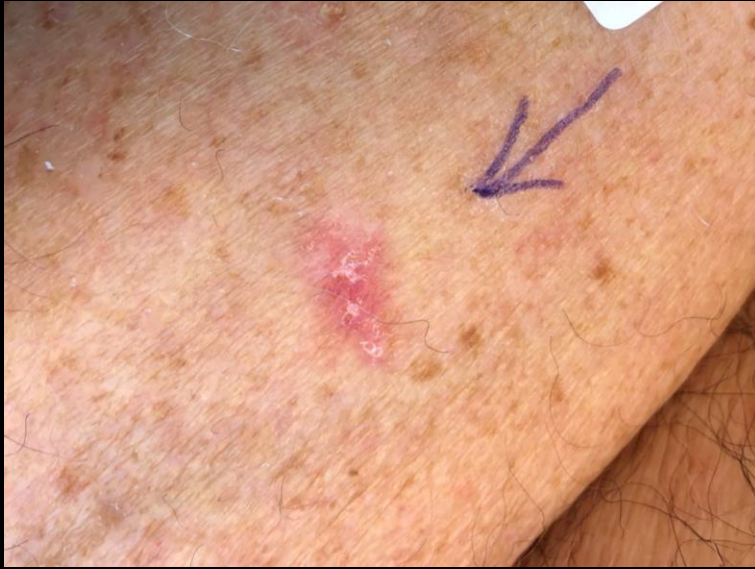

Follow up 3-6 months

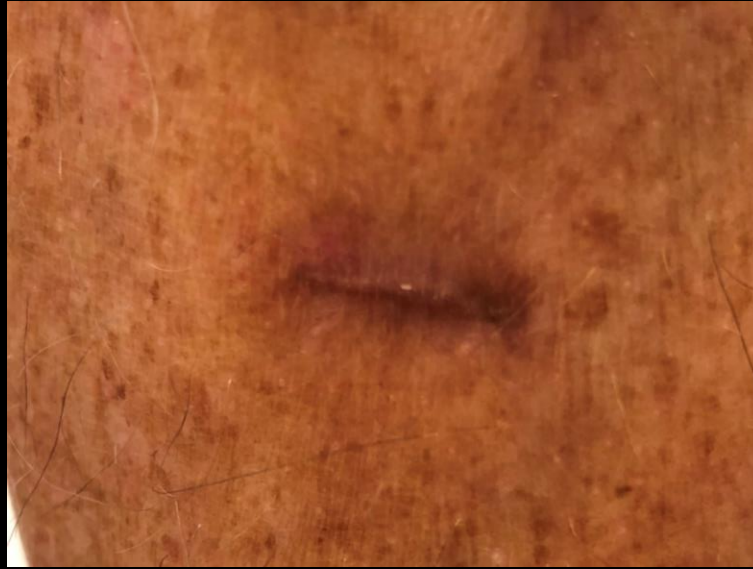

Follow up 12 months

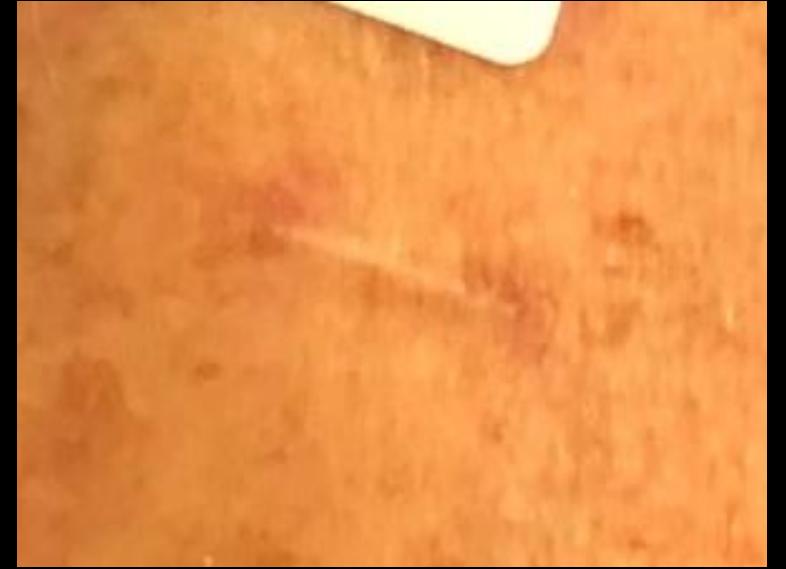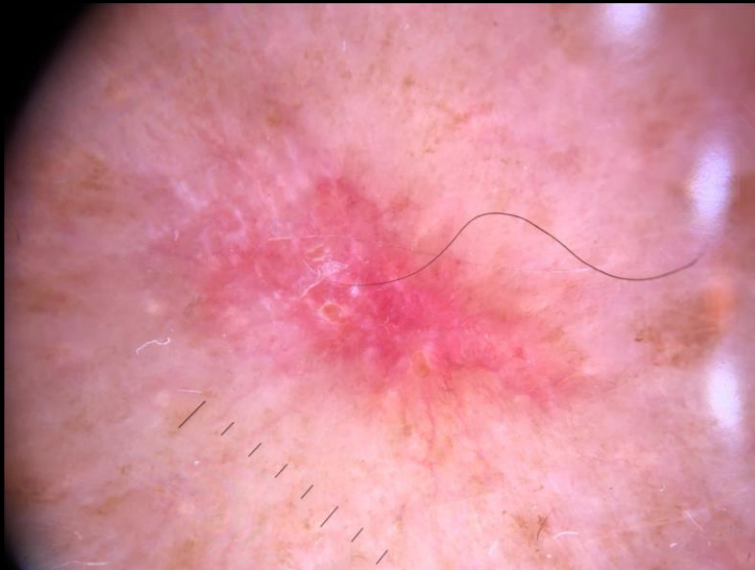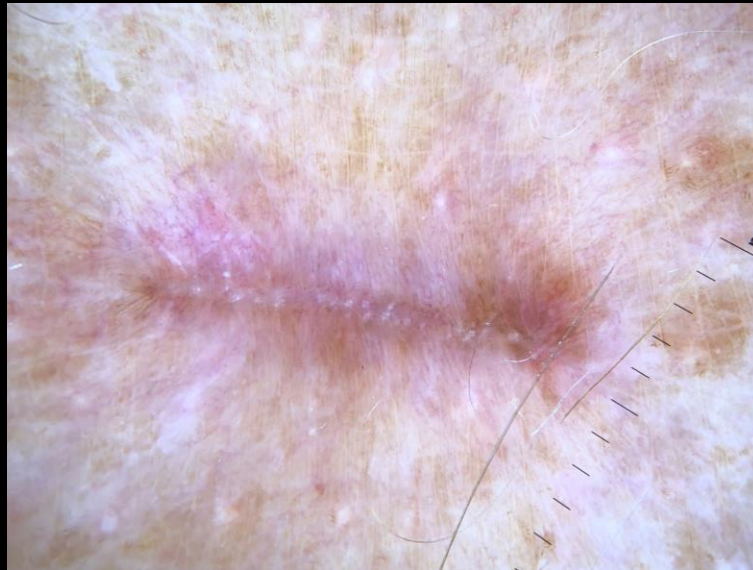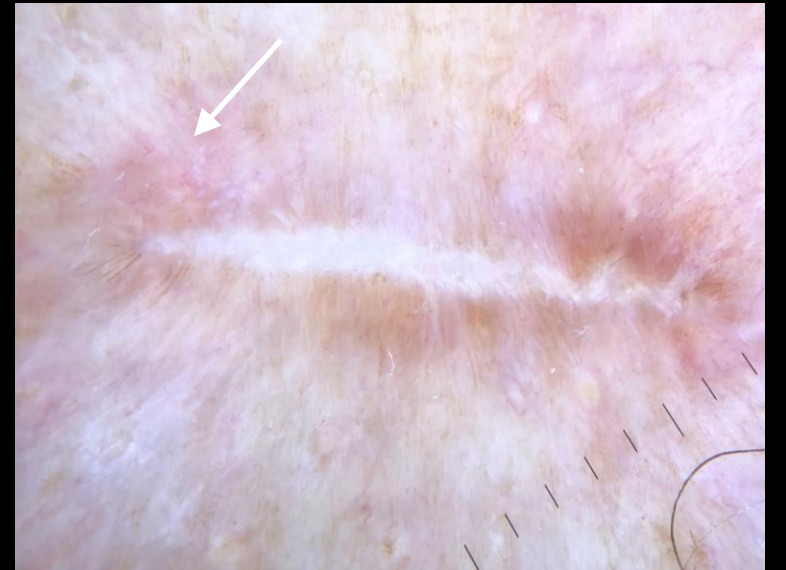



Inclusion

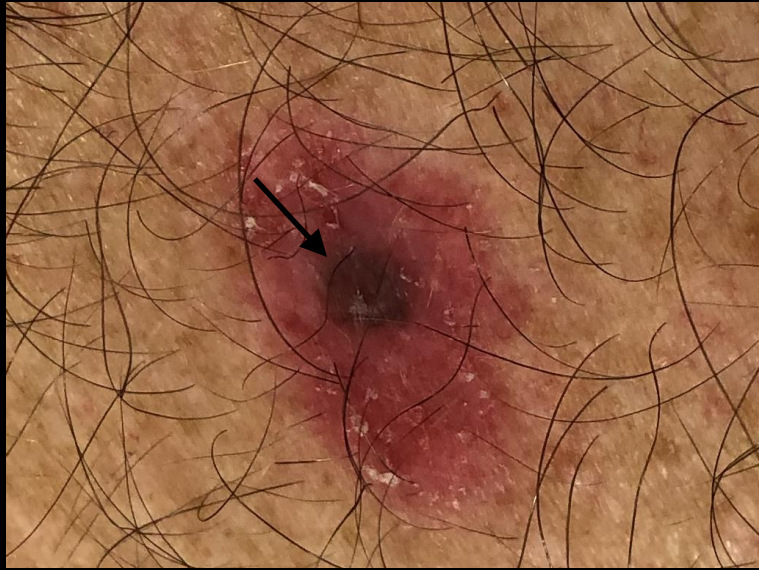

Follow up 3-6 months

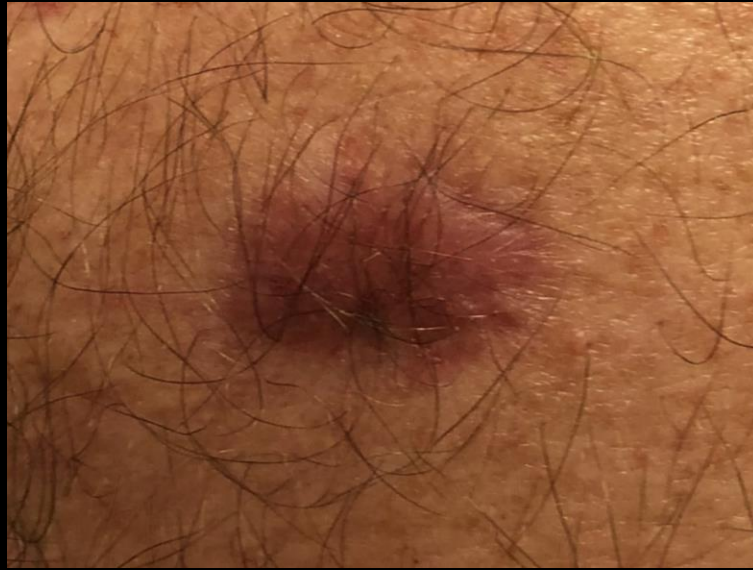

Follow up 12 months

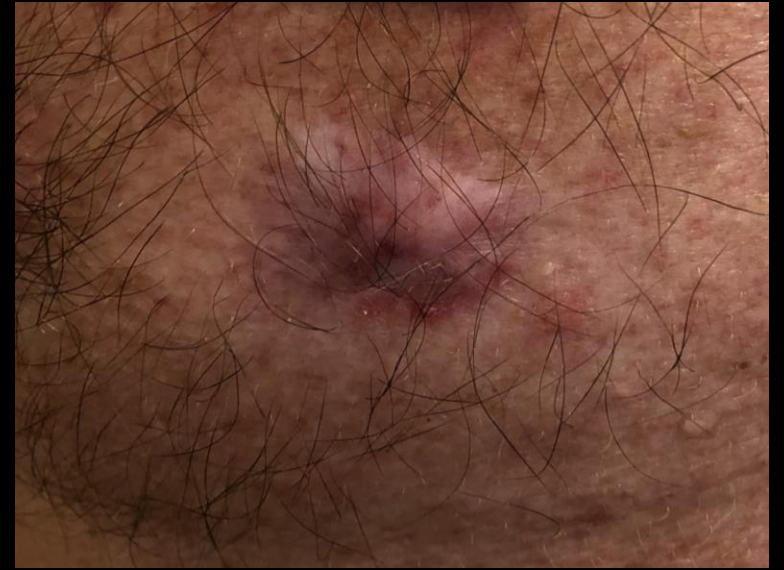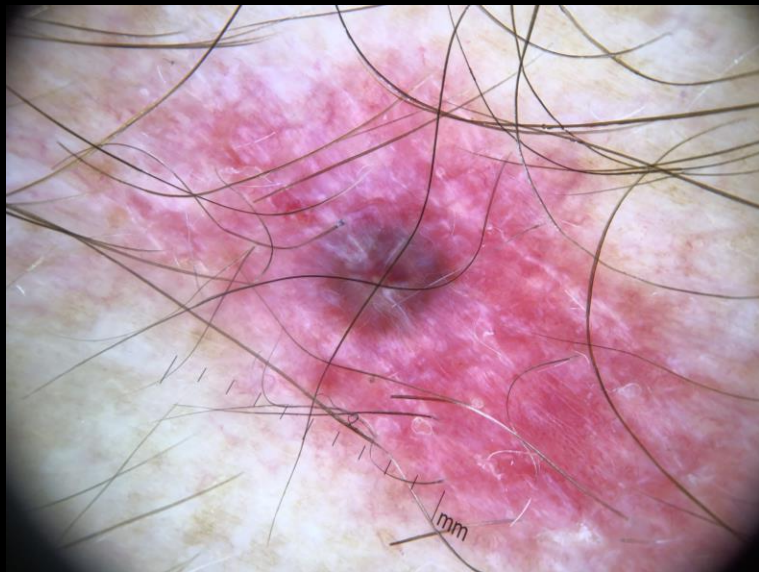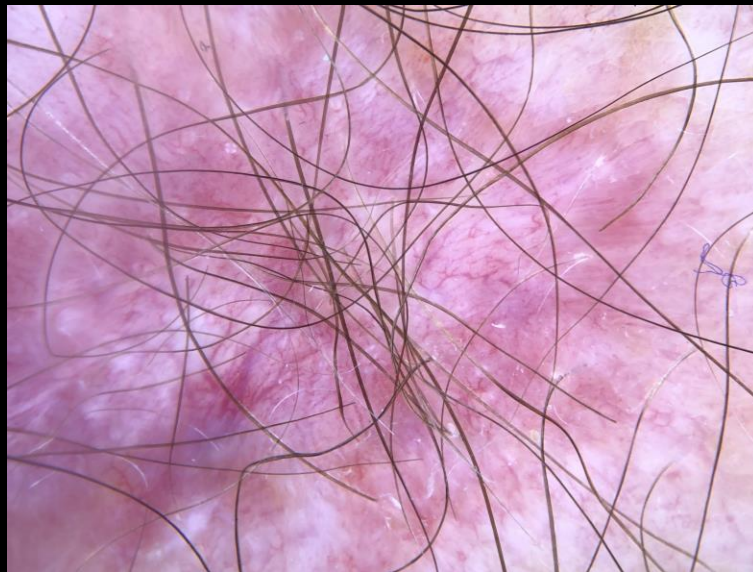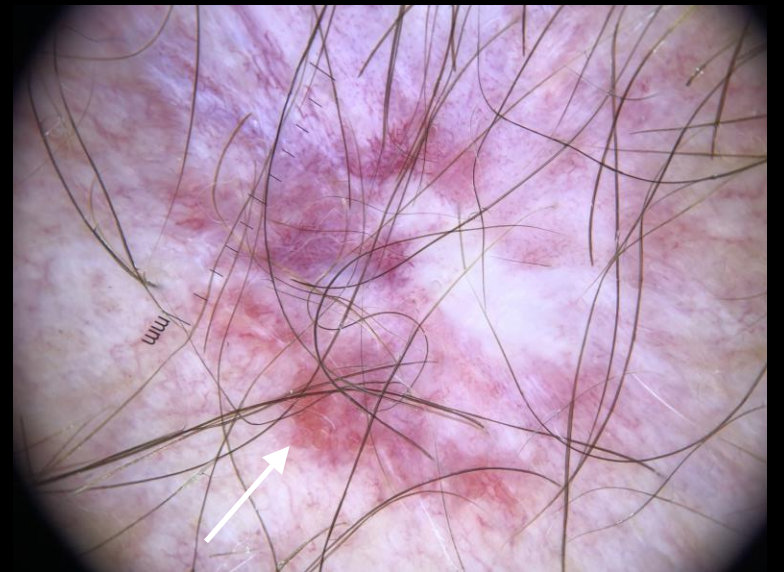



Inclusion

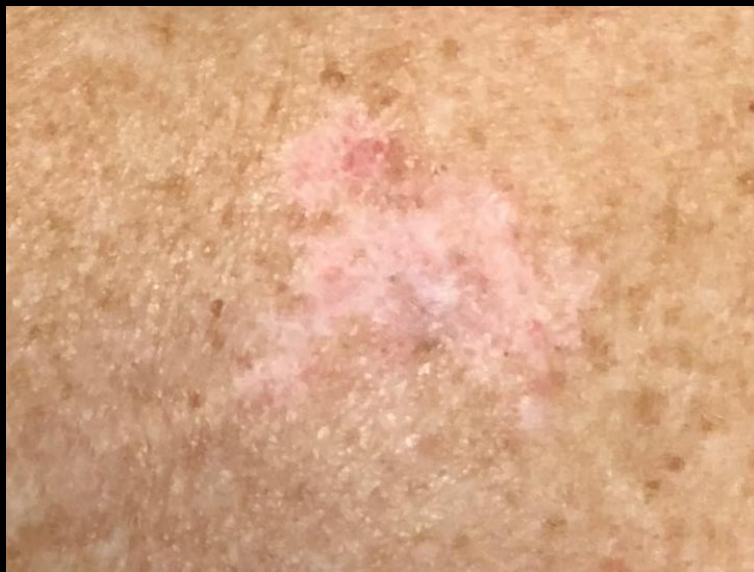

Follow up 3-6 months

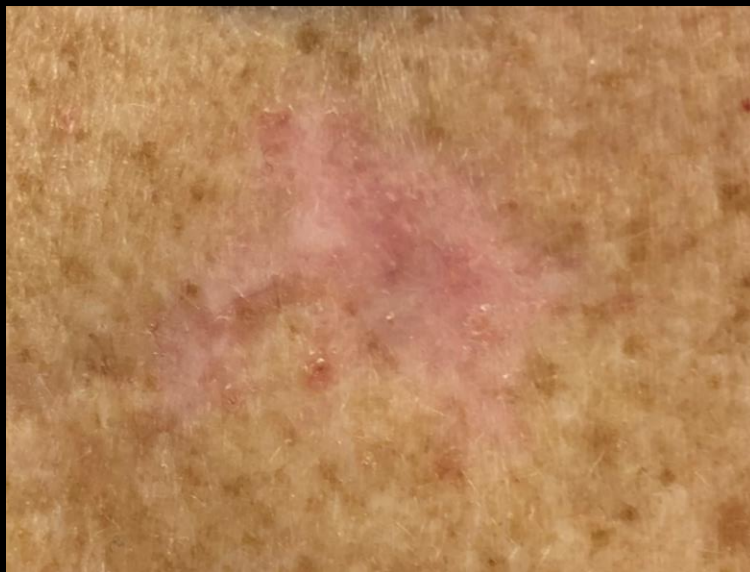

Follow up 12 months

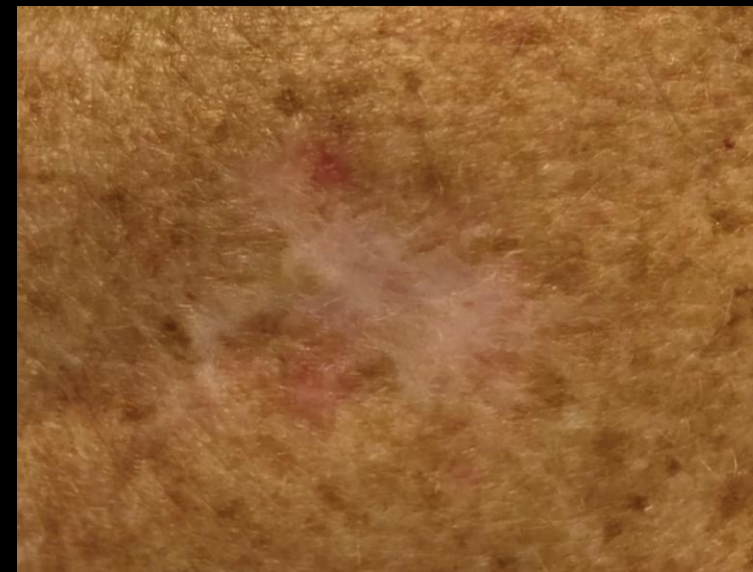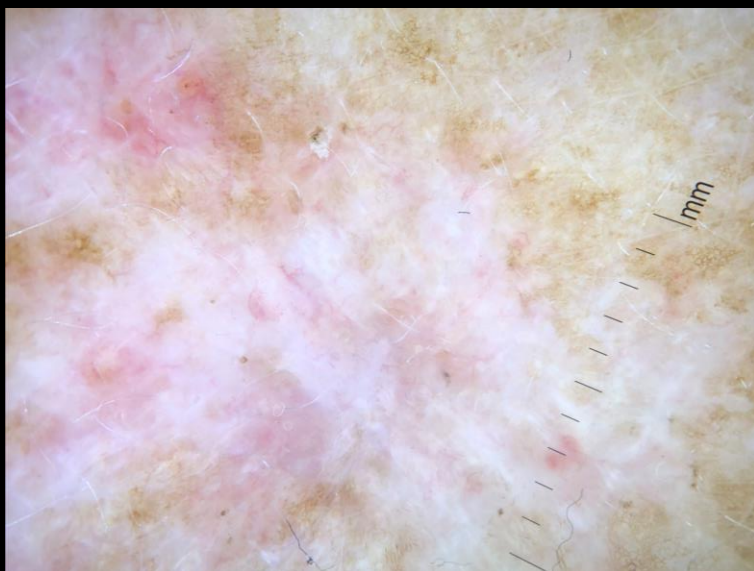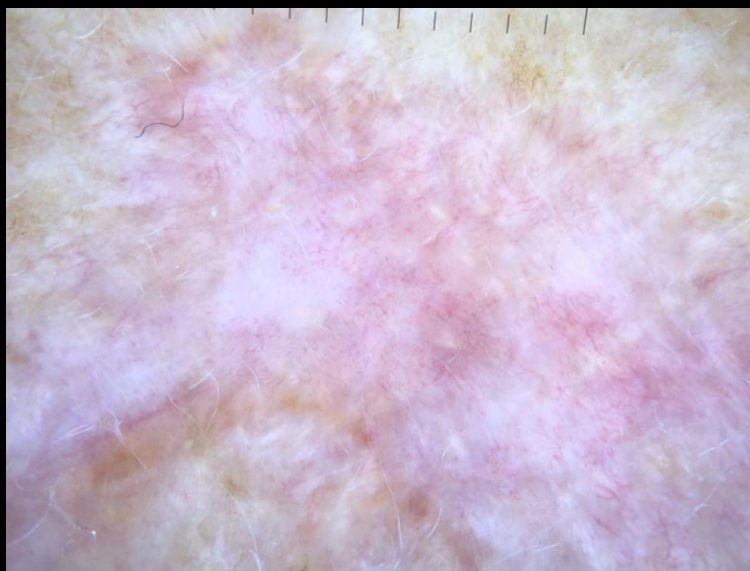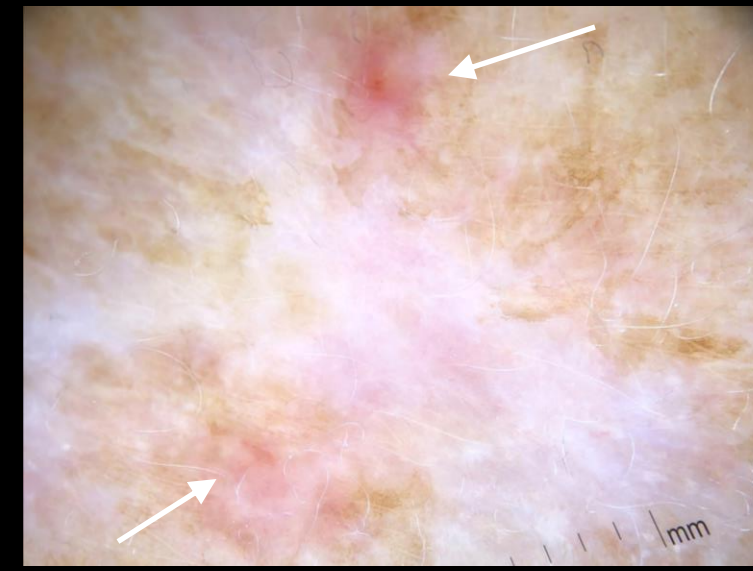



Inclusion

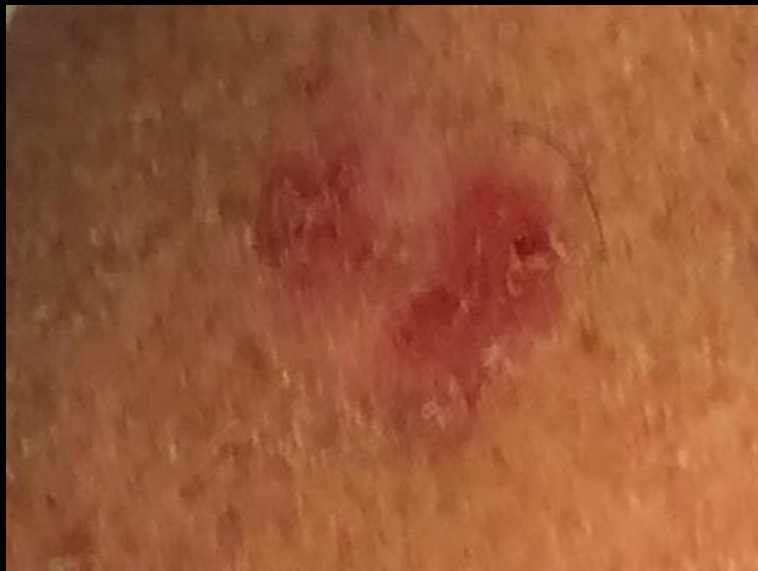

Follow up 3-6 months

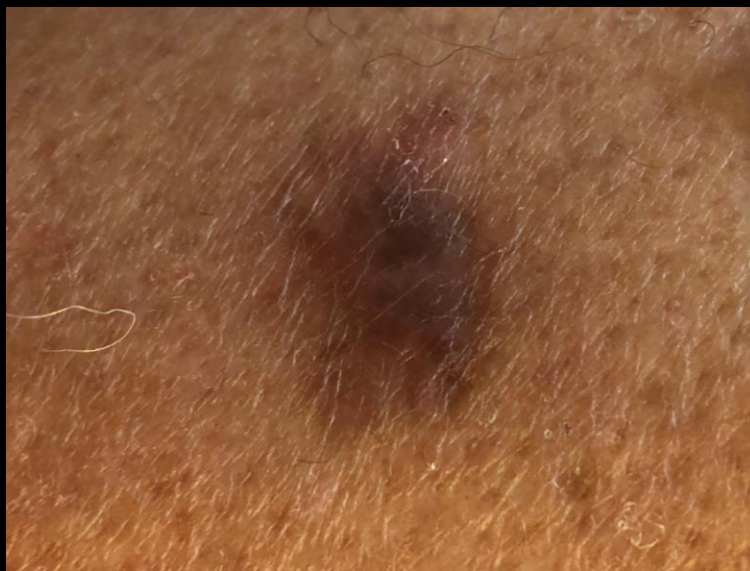

Follow up 12 months

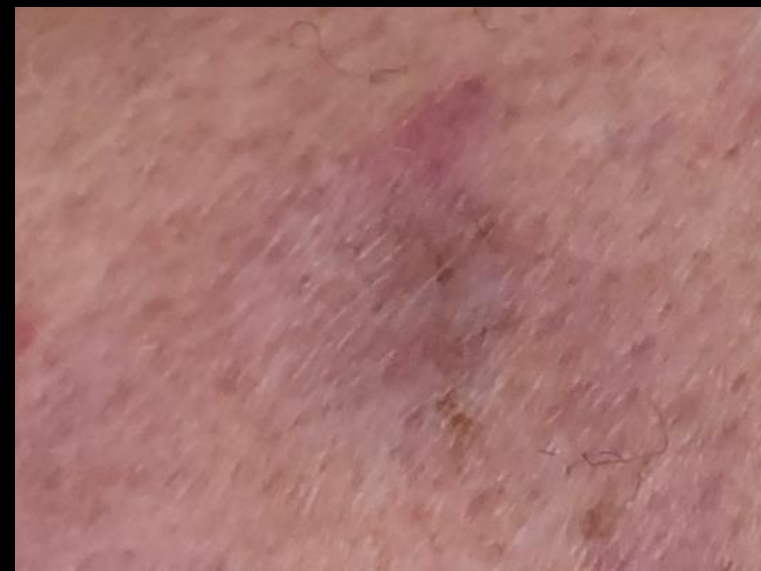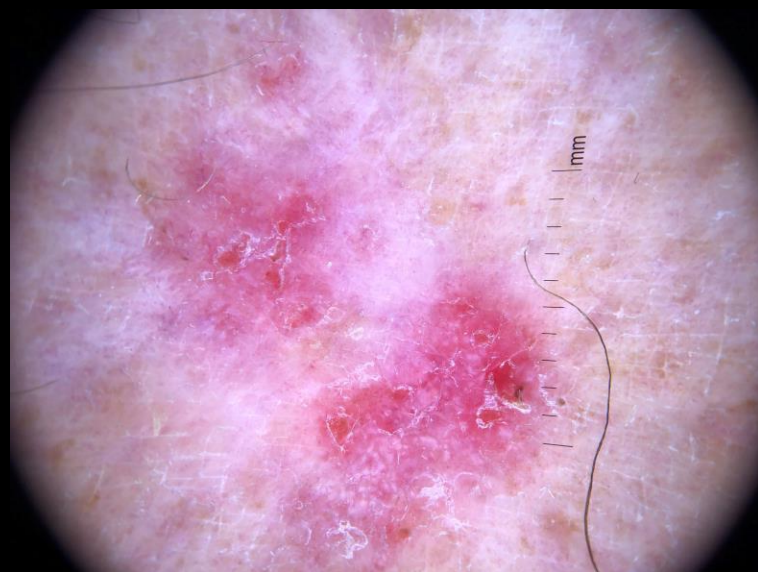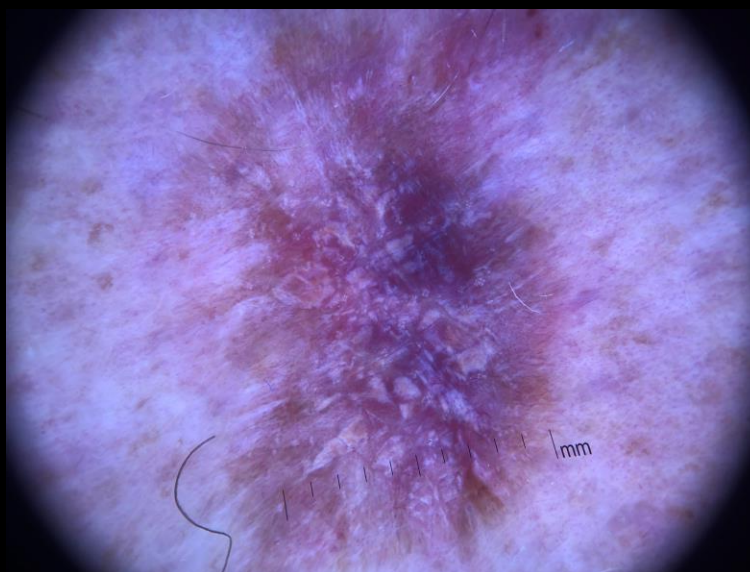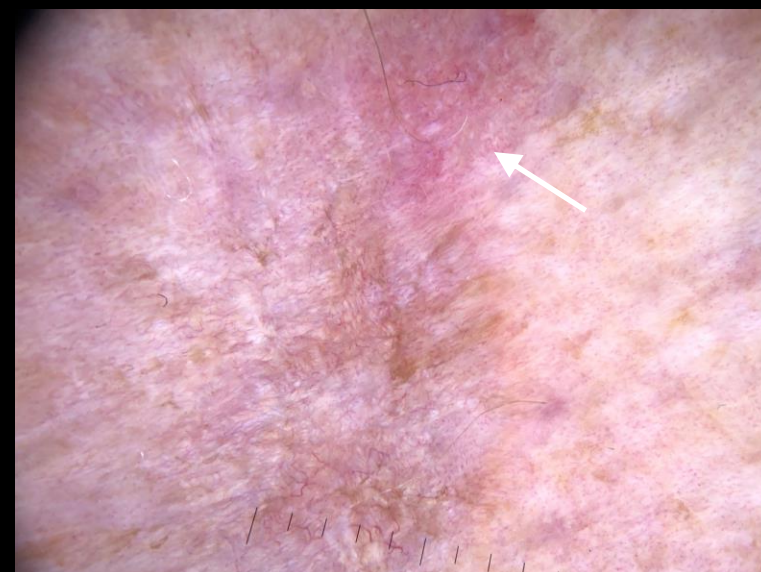



Inclusion

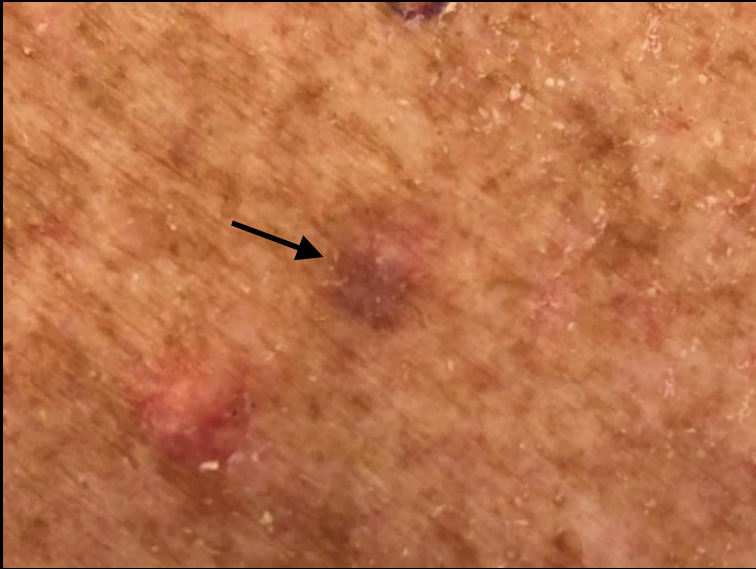

Follow up 3-6 months

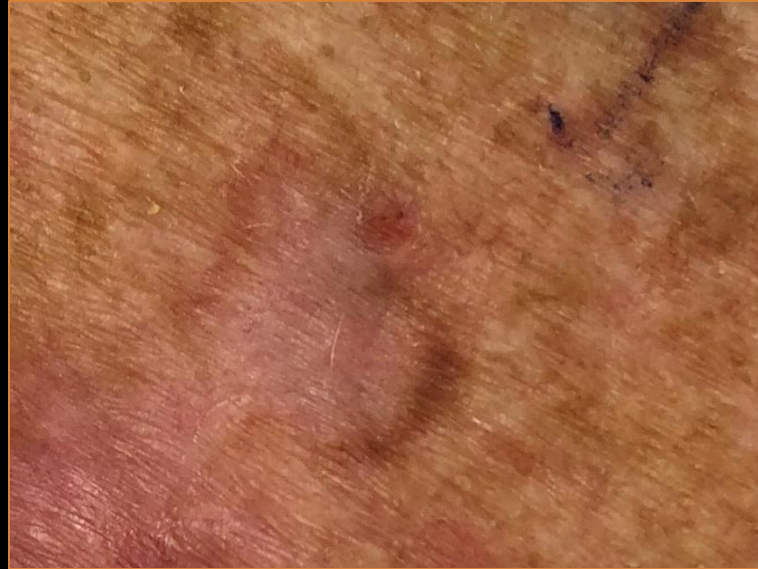

Follow up 12 months

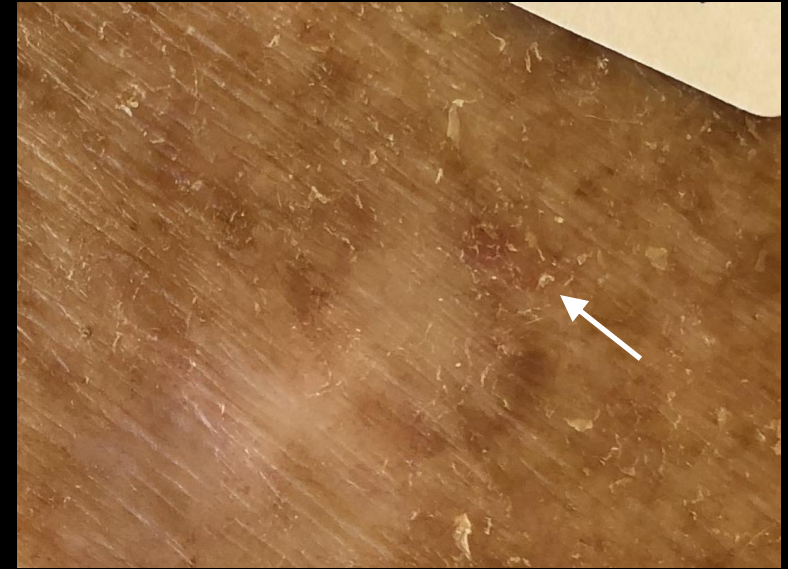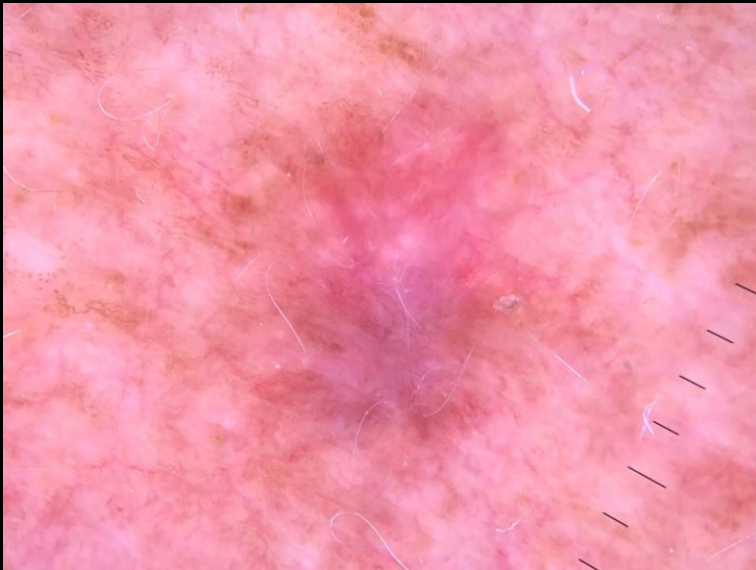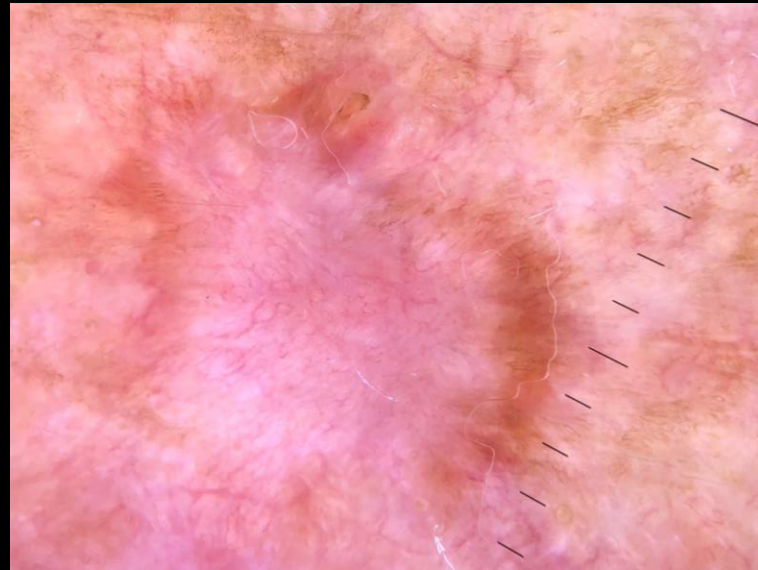

Dermoscopic picture  
12 months missing
